# Supplementary material for: Photocatalyst-free H2O-regulated and regiodivergent multicomponent hydrogenation/bifunctional sulfonylation of alkynes
Source: Royal Society of Chemistry journal article supplement (doi:10.1039/d3gc04960d), 2024-01-01
Supplement: d3gc04960d1.pdf [file d3gc04960d1.pdf]

## Supporting Information

### Photocatalyst-free H<sub>2</sub>O-regulated and regiodivergent

### multicomponent hydrogenation/bifunctional sulfonylation of alkynes

Jie Sun,<sup>a</sup> Chaodong Wang,<sup>a</sup> Chunlei Wu,<sup>b</sup> Wenjian Wang,<sup>a</sup> Yue Zeng,<sup>a</sup> Shengjie Song,<sup>a</sup> Zhiwei Chen<sup>\*a</sup> and Jianjun Li<sup>\*a,c</sup>

<sup>a</sup>Key Laboratory for Green Pharmaceutical Technologies and Related Equipment of Ministry of Education, College of Pharmaceutical Sciences, Zhejiang University of Technology, Hangzhou 310014, P. R. China

<sup>b</sup>Zhejiang Engineering Research Center of Fat-soluble Vitamin, Shaoxing University, Shaoxing 312000, P. R. China

<sup>c</sup>Key Laboratory of Pharmaceutical Engineering of Zhejiang Province. College of Pharmaceutical Sciences, Zhejiang University of Technology, Hangzhou 310014, P. R. China

E-mail: [chenzhiwei@zjut.edu.cn](mailto:chenzhiwei@zjut.edu.cn).

E-mail: [lijianjun@zjut.edu.cn](mailto:lijianjun@zjut.edu.cn).

### Table of Contents

|                                                                                                               |     |
|---------------------------------------------------------------------------------------------------------------|-----|
| 1. General information .....                                                                                  | S2  |
| 2. Light-promoted reaction equipment.....                                                                     | S2  |
| 3. General Procedure for Synthesis of Products <b>1</b> 、 <b>2</b> 、 <b>2'</b> 、 <b>3</b> and <b>4</b> . .... | S3  |
| 4. Optimization of reaction conditions.....                                                                   | S6  |
| 5. Mechanistic Studies .....                                                                                  | S8  |
| 6. References .....                                                                                           | S12 |
| 7. Characterization data for the products .....                                                               | S13 |
| 8. <sup>1</sup> H, <sup>13</sup> C and <sup>19</sup> F NMR spectra for products .....                         | S34 |
| 9. X-ray crystallography date of <b>3ac</b> and <b>4fa</b> .....                                              | S98 |

## 1. General information.

Unless otherwise specified, all reagents are obtained from commercial sources and can be used without further purification (including acetonitrile (AR, moisture  $\leq$  3000 ppm and moisture  $\leq$  30 ppm) and dimethyl sulfoxide (AR, moisture  $\leq$  1000 ppm and moisture  $\leq$  50 ppm)). Chromatographic purification of products was performed by flash column chromatography on silica gel (200–300 meshes). Thin-layer chromatography (TLC) was carried out on silica plates (TLC Silica GF254). Visualization of the compounds was accomplished by projecting UV light onto the developed plates. The experiments were conducted in sealed 10 mL or 100 mL Schlenk tube for gram-scale synthesis. The experiments under 460-465 nm light irradiation were performed using two 25 W JG LED lamps from Xuzhou Ai Jia Electronic Technology Co., Ltd. The distance from the light source to the irradiation vessel was approximate 2-3 cm, and no filter was used in our study. A fan was employed to ensure reactions remained at or near room temperature when using LED.  $^1\text{H}$  NMR (400/600 MHz),  $^{13}\text{C}$  NMR (100/150 MHz) and  $^{19}\text{F}$  NMR (376/565 MHz) spectra were recorded on a Varian spectrometer in  $\text{CDCl}_3$  or  $\text{DMSO}-d_6$  using tetramethylsilane (TMS) as internal standards. Data are reported as follows: Chemical shift (number of protons, multiplicity, coupling constants). Coupling constants were quoted to the nearest 0.1 Hz and multiplicity reported according to the following convention: s = singlet, d = doublet, t = triplet, q = quartet, m = multiplet, dd = doublet of doublets, dt = doublet of triplets, td = triplet of doublets, ddd = doublet of doublet of doublets, brs = broad singlet. HRMS spectra were recorded on a Bruker Impact II UHR-QTOF spectrometer using ESI on a TOF mass analyzer. UV-visible absorption experiments were performed on UV-2250 spectrophotometer. Fluorescence quenching experiments were performed on Hitachi F7000 FL Spectrophotometer. The cyclic voltammetry measurements were detected by using a CHI 600E electrochemical workstation.

## 2. Light-promoted reaction equipment.

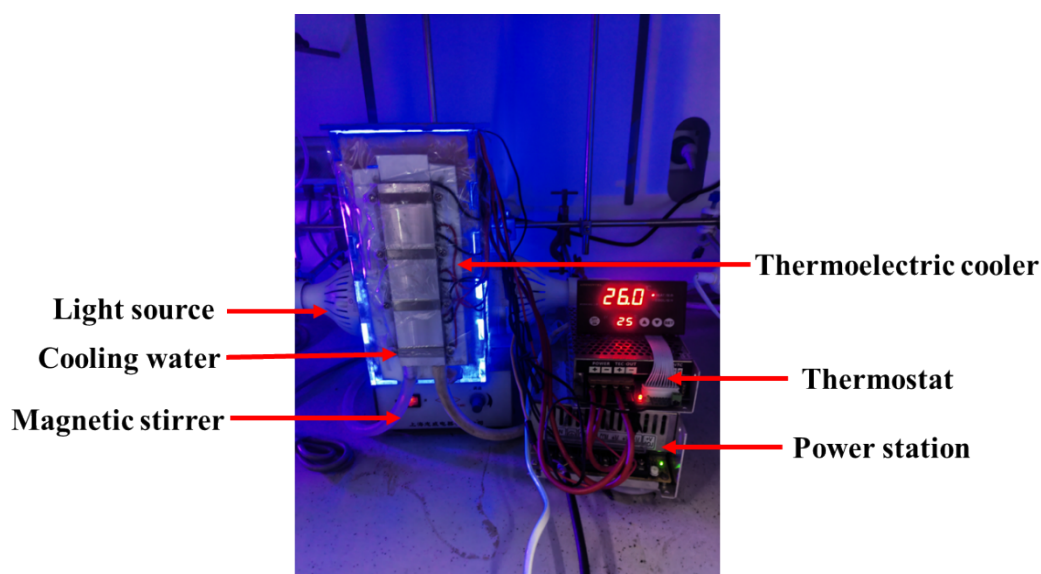

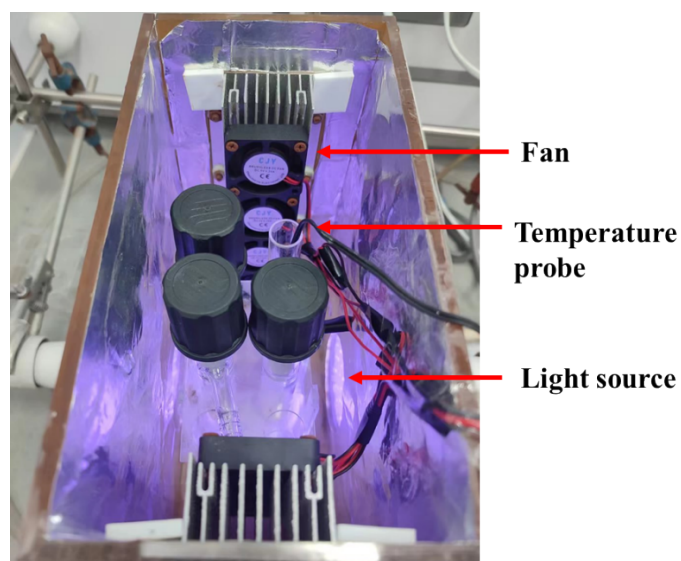

Light source details: The experiments under 460-465 nm light irradiation were performed using two 25 W JG LED lamps from Xuzhou Ai Jia Electronic Technology Co., Ltd. The distance between the light source and the irradiation glass vessel is 2-3 cm, and no filter was used in our study. A fan was employed to ensure reactions remained at or near room temperature when using LEDs.

### 3. General Procedure for Synthesis of Products 1、2、2'、3 and 4.

#### (1) General Procedure for the Synthesis of 1. <sup>[1]</sup>

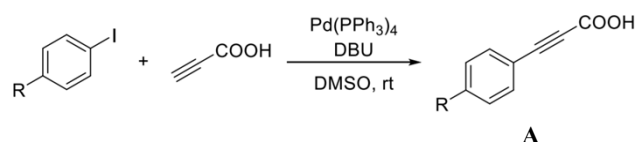

Arylpropionic acids were prepared using a modified procedure according to the reported literature.<sup>1</sup> To a solution of aryl iodide (5.0 mmol) in DMSO (6 mL) was added Pd(PPh<sub>3</sub>)<sub>4</sub> (144 mg, 2.5 mol%) and DBU (1.83 g, 12 mmol, 2.4 equiv.). The solution of propiolic acid (420 mg, 6.0 mmol, 1.2 equiv.) in DMSO (6 mL) was poured into the flask. The mixture was stirred at room temperature for 12 h before ethyl acetate (20 mL) was poured into the reaction mixture. The reaction mixture was extracted with saturated aqueous NaHCO<sub>3</sub> solution. The aqueous layer was separated, acidified to pH 2.0 by addition of cold HCl (1 N), and extracted with DCM. The combined organic layers were dried over Na<sub>2</sub>SO<sub>4</sub>, and concentrated in vacuo. The residue was purified by column chromatography on silica gel with petroleum ether/ethyl acetate to afford the desired product A.

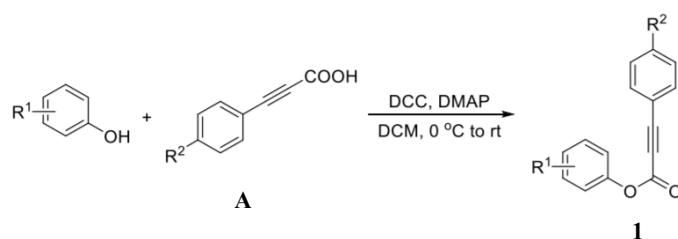

To a solution of the relative phenol **A** (3.0 mmol, 1.0 equiv.) in DCM (30 mL) was added arylpropionic acid (3.3 mmol, 1.1 equiv.) at 0 °C, then a mixture of DCC (929 mg, 4.5 mmol, 1.5 equiv.) and DMAP (37 mg, 0.3 mmol, 0.1 equiv.) in CH<sub>2</sub>Cl<sub>2</sub> (15 mL) was added dropwise. The mixture was stirred at room temperature for 12 h. Then, the crude mixture was filtered and washed with DCM and concentrated. The residue was purified by column chromatography on silica gel with petroleum ether/ethyl acetate to afford the desired product **1**.

## (2) General Procedure for the Synthesis of **2**.<sup>[2]</sup>

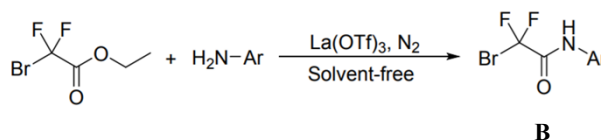

A 10 mL Schlenk bomb was charged with lanthanum trifluoromethanesulfonate La(OTf)<sub>3</sub>, 0.25 mmol, 5 mol%), ethyl bromodifluoroacetate (6.0 mmol) and amine (5.0 mmol) in an atmosphere of N<sub>2</sub> at the room temperature. The mixture was monitored by TLC. After the amine was exhausted, purification by chromatography on silica gel afforded the target amides **B**.

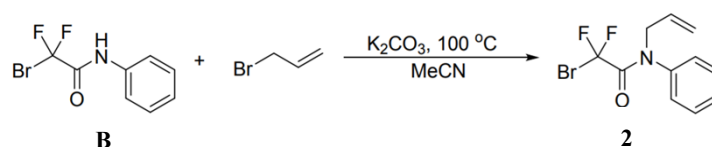

To a solution of the 2-bromo-2,2-difluoro-*N*-phenylacetamide **B** (1.25 g, 5.0 mmol) in CH<sub>3</sub>CN (25 mL), K<sub>2</sub>CO<sub>3</sub> (2.07 g, 15 mmol) and 3-bromopropene (1.21 g, 10 mmol) were added. The reaction mixture was stirred at 100 °C and monitored by TLC. After the amide was exhausted, the mixture was purified by silica gel column chromatography to give the desired product **2**.

## (3) General Procedure for the Synthesis of **2'**.<sup>[3]</sup>

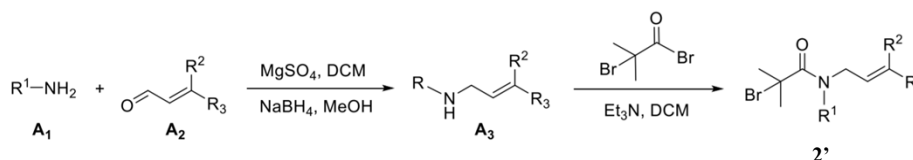

Appropriate amine **A**<sub>1</sub> (10 mmol, 1.0 equiv.), magnesium sulfate (1.81 g, 15.0 mmol) and 3-methyl-2-butenal **A**<sub>2</sub> (1.38 g, 10.0 mmol, 1.0 equiv.) suspended in DCM stirred 4 hours at room temperature. Filtered the mixture and concentrated the filtrate by evaporation. The residue was dissolved in methanol (10.00 mL) and cooled to 0 °C. Slowly added the sodium borohydride (0.19 g, 5.0 mmol), stirred reaction mixture at room temperature for 2 hours. Then, quenched the reaction system with saturated NH<sub>4</sub>Cl aqueous solution, extracted with EtOAc, washed with brine, and dried over Na<sub>2</sub>SO<sub>4</sub>. Final, the organic layer was evaporated under reduced pressure and residue was purified by column chromatography on silica to afford the **A**<sub>3</sub> (10/1 petroleum ether/EtOAc).

**A**<sub>3</sub> and Et<sub>3</sub>N (1.40 mL, 10.0 mmol, 2.0 equiv.) were suspended in DCM (20.00 mL) and cooled to 0 °C, subsequently, dropwise added 2-bromo-2-methylpropanoyl bromide (0.67 mL, 5.5 mmol, 1.1 equiv.) and stirred the reaction system at room temperature for 12 h. After that, NH<sub>4</sub>Cl aqueous solution was added, extracted with dichloromethane washed with saturated sodium bicarbonate,

dried with Na<sub>2</sub>SO<sub>4</sub>. Evaporated the organic layer and purified by column chromatography (10-20% EtOAc in petroleum ether) gave the **2**'

#### (4) General Procedure for the Synthesis of **4**.

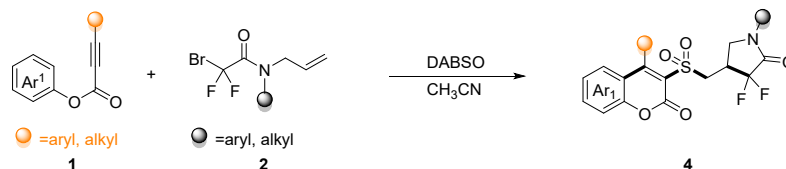

To a 10 mL schlenk-tube was charged with **1** (0.2 mmol, 1.0 equiv.), **2** (0.4 mmol, 2.0 equiv.), DABCO·(SO<sub>2</sub>)<sub>2</sub> (0.4 mmol, 2.0 equiv.) in dry CH<sub>3</sub>CN (2 mL, moisture ≤ 30 ppm) under nitrogen atmosphere. The mixture was irradiated with 25 W blue LEDs under vigorous stirring at room temperature for 12-16 h. After the reaction completed, the reaction mixture was diluted with H<sub>2</sub>O (15 mL) and extracted with CH<sub>2</sub>Cl<sub>2</sub> (20 mL × 4). The combined organic layers were washed with brine (30 mL), dried over anhydrous Na<sub>2</sub>SO<sub>4</sub>, and concentrated in vacuo. The residue was purified by column chromatography on silica gel with petroleum ether/ethyl acetate to afford the desired product **3**.

#### (5) General Procedure for the Synthesis of **3**.

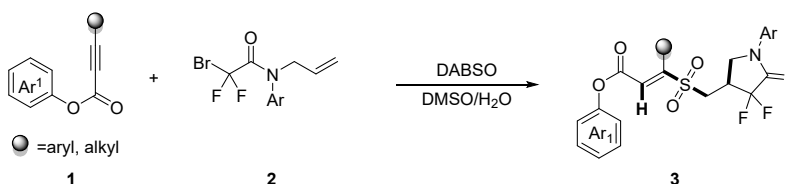

To a 10 mL schlenk-tube was charged with **1** (0.2 mmol, 1.0 equiv.), **2** (0.4 mmol, 2.0 equiv.), DABCO·(SO<sub>2</sub>)<sub>2</sub> (0.4 mmol, 2.0 equiv.) in DMSO/H<sub>2</sub>O (2 mL (v/v = 39:1)) under nitrogen atmosphere. The mixture was irradiated with 25 W blue LEDs under vigorous stirring at room temperature for 12-24 h. After the reaction completed, the reaction mixture was diluted with H<sub>2</sub>O (15 mL) and extracted with CH<sub>2</sub>Cl<sub>2</sub> (20 mL × 4). The combined organic layers were washed with brine (30 mL), dried over anhydrous Na<sub>2</sub>SO<sub>4</sub>, and concentrated in vacuo. The residue was purified by column chromatography on silica gel with petroleum ether/ethyl acetate to afford the desired product **4**.

#### (6) Gram Procedure for the Synthesis of **4aa** and **3aa**.

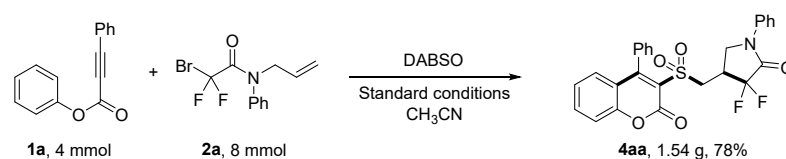

To a 100 mL schlenk-tube was charged with **1a** (4 mmol, 1.0 equiv.), **2a** (8 mmol, 2.0 equiv.), DABCO·(SO<sub>2</sub>)<sub>2</sub> (8 mmol, 2.0 equiv.) in dry CH<sub>3</sub>CN (40 mL, moisture ≤ 30 ppm) under nitrogen

atmosphere. The mixture was irradiated with 25 W blue LEDs under vigorous stirring at room temperature for 30 h. After the reaction completed, the reaction mixture was diluted with H<sub>2</sub>O (50 mL) and extracted with CH<sub>2</sub>Cl<sub>2</sub> (40 mL × 4). The combined organic layers were washed with brine (40 mL), dried over anhydrous Na<sub>2</sub>SO<sub>4</sub>, and concentrated in vacuo. The residue was purified by column chromatography on silica gel with petroleum ether/ethyl acetate (5:1) to afford the desired product **4aa**.

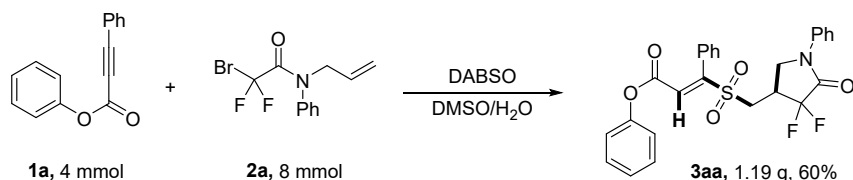

To a 100 mL schlenk-tube was charged with **1a** (4 mmol, 1.0 equiv.), **2a** (8 mmol, 2.0 equiv.), DABCO·(SO<sub>2</sub>)<sub>2</sub> (8 mmol, 2.0 equiv.) in DMSO/H<sub>2</sub>O (40 mL (v/v = 39:1)) under nitrogen atmosphere. The mixture was irradiated with 25 W blue LEDs under vigorous stirring at room temperature for 30 h. After the reaction completed, the reaction mixture was diluted with H<sub>2</sub>O (50 mL) and extracted with CH<sub>2</sub>Cl<sub>2</sub> (40 mL × 4). The combined organic layers were washed with brine (40 mL × 3), dried over anhydrous Na<sub>2</sub>SO<sub>4</sub>, and concentrated in vacuo. The residue was purified by column chromatography on silica gel with petroleum ether/ethyl acetate (10:1) to afford the desired product **3aa**.

## 4. Optimization of reaction conditions.

### 4.1 Effect of solvent ratio on reaction.<sup>a</sup>

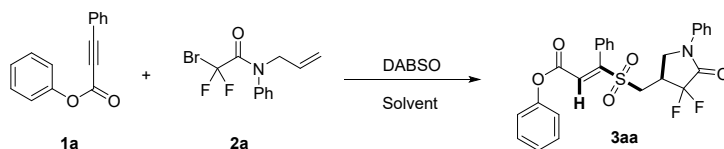

| Entry          | Solvent                                 | 4aa/Yield (%) <sup>b</sup> |
|----------------|-----------------------------------------|----------------------------|
| 1              | DMSO (2 mL)                             | 0                          |
| 2 <sup>c</sup> | DMSO (2 mL)                             | 14                         |
| 3              | DMSO/H <sub>2</sub> O (2 mL, v/v=199:1) | 27                         |
| 4              | DMSO/H <sub>2</sub> O (2 mL, v/v=99:1)  | 35                         |
| 5              | DMSO/H <sub>2</sub> O (2 mL, v/v=197:3) | 48                         |
| 6              | DMSO/H <sub>2</sub> O (2 mL, v/v=49:1)  | 66                         |
| 7              | DMSO/H <sub>2</sub> O (2 mL, v/v=39:1)  | 76                         |
| 8              | DMSO/H <sub>2</sub> O (2 mL, v/v=97:3)  | 68                         |
| 9              | DMSO/H <sub>2</sub> O (2 mL, v/v=19:1)  | 47                         |
| 10             | DMSO/H <sub>2</sub> O (2 mL, v/v=1:1)   | 0                          |

<sup>a</sup>Reaction conditions: **1** (0.2 mmol, 1.0 equiv.), **2** (0.4 mmol, 2.0 equiv.), DABSO (0.4 mmol, 2.0

equiv.), solvent (2 mL, (dry DMSO, moisture  $\leq 50$  ppm)), room temperature under  $N_2$ , irradiation with blue LEDs ( $25W \times 2$ , 460-465nm) for 12 h. <sup>b</sup>Isolated yields. <sup>c</sup>Solvent (2 mL, moisture  $\leq 1000$  ppm).

#### 4.2 Effect of temperature on reaction.<sup>a</sup>

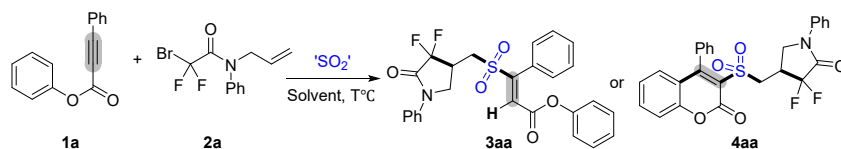

| Entry    | T/°C      | Solvent                    | 3aa/Yield (%) <sup>b</sup> | 4aa/Yield (%) <sup>b</sup> |
|----------|-----------|----------------------------|----------------------------|----------------------------|
| <b>1</b> | <b>25</b> | <b>DMSO/H<sub>2</sub>O</b> | <b>76</b>                  | <b>&lt;10</b>              |
| 2        | 20        | DMSO/H <sub>2</sub> O      | trace                      | N.D.                       |
| 3        | 30        | DMSO/H <sub>2</sub> O      | 72                         | <15                        |
| 4        | <b>25</b> | <b>CH<sub>3</sub>CN</b>    | <b>N.D.</b>                | <b>90</b>                  |
| 5        | 20        | CH <sub>3</sub> CN         | N.D.                       | 30                         |
| 6        | 30        | CH <sub>3</sub> CN         | N.D.                       | 82                         |

<sup>a</sup>Reaction conditions: **1a** (0.2 mmol, 1.0 equiv.), **2a** (0.4 mmol, 2.0 equiv.), DABSO (0.4 mmol, 2.0 equiv.), degassed solvent (2 mL, (CH<sub>3</sub>CN (moisture  $\leq 30$  ppm) and DMSO (moisture  $\leq 1000$  ppm)), room temperature under  $N_2$ , irradiation with blue LEDs ( $25W \times 2$ , 460-465nm) for 12-24 h.

<sup>b</sup>Isolated yields.

#### 4.3 Effect of solvent on reaction.<sup>[4] a</sup>

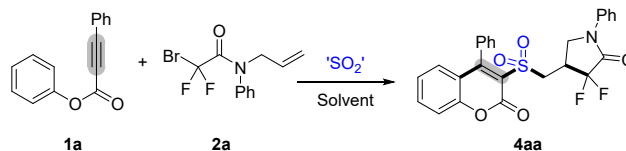

| Entry    | Solvent                     | 4aa/Yield (%) <sup>b</sup> |
|----------|-----------------------------|----------------------------|
| <b>1</b> | <b>CH<sub>3</sub>CN</b>     | <b>90</b>                  |
| 2        | MeOH                        | 31                         |
| 3        | 2-Methyltetrahydrofuran     | 49                         |
| 4        | Ethyl acetate               | 18                         |
| 5        | Acetone                     | 74                         |
| 6        | <i>N</i> -Methylpyrrolidone | N.D.                       |
| 7        | DCE                         | 45                         |

<sup>a</sup>Reaction conditions: **1a** (0.2 mmol, 1.0 equiv.), **2a** (0.4 mmol, 2.0 equiv.), DABSO (0.4 mmol, 2.0 equiv.), degassed solvent (2 mL), room temperature under  $N_2$ , irradiation with blue LEDs ( $25W \times 2$ , 460-465nm) for 12-31 h. <sup>b</sup>Isolated yields.

#### 4.4 Effect of light sources on reaction.<sup>a</sup>

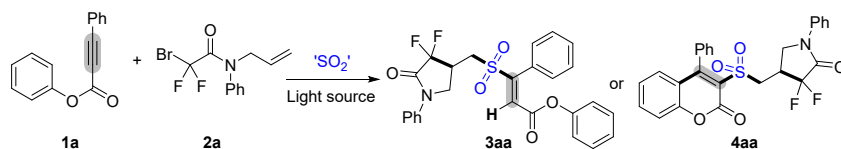

| Entry | Solvent               | Light source             | 3aa/Yield (%) <sup>b</sup> | 4aa/Yield (%) <sup>b</sup> |
|-------|-----------------------|--------------------------|----------------------------|----------------------------|
| 1     | DMSO/H <sub>2</sub> O | blue LEDs (460-465 nm)   | 76                         | <10                        |
| 2     | DMSO/H <sub>2</sub> O | green LEDs (520-530 nm)  | trace                      | N.D.                       |
| 3     | DMSO/H <sub>2</sub> O | violet LEDs (390-400 nm) | 61                         | <5                         |
| 4     | DMSO/H <sub>2</sub> O | white LEDs (400-800 nm)  | 24                         | trace                      |
| 5     | CH <sub>3</sub> CN    | blue LEDs (460-465 nm)   | N.D.                       | 90                         |
| 6     | CH <sub>3</sub> CN    | green LEDs (520-530 nm)  | N.D.                       | 24                         |
| 7     | CH <sub>3</sub> CN    | violet LEDs (390-400 nm) | N.D.                       | 78                         |
| 8     | CH <sub>3</sub> CN    | white LEDs (400-800 nm)  | N.D.                       | 43                         |

<sup>a</sup>Reaction conditions: **1a** (0.2 mmol, 1.0 equiv.), **2a** (0.4 mmol, 2.0 equiv.), DABSO (0.4 mmol, 2.0 equiv.), degassed solvent (2 mL, (CH<sub>3</sub>CN (moisture ≤ 30 ppm) and DMSO (moisture ≤ 1000 ppm)), room temperature under N<sub>2</sub>, irradiation with light sources (25W × 2) for 12-16 h. <sup>b</sup>Isolated yields.

## 5. Mechanistic Studies.

### (1) Radical trapping Experiment.

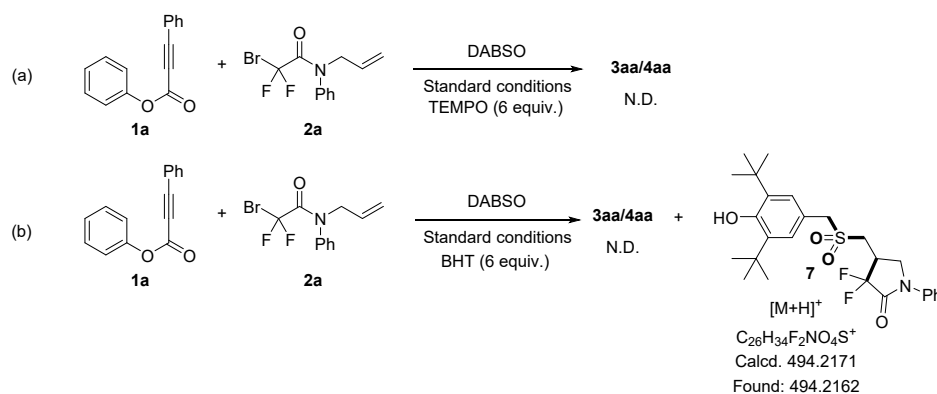

+MS, 0.3min #17

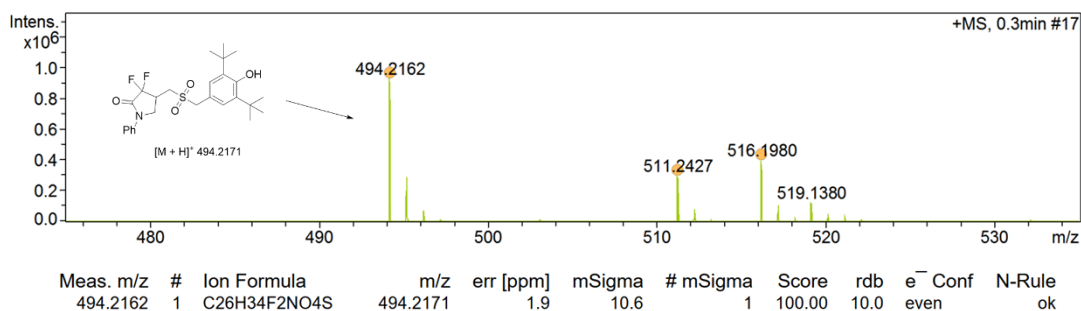

The radical trapping experiments were conducted with **1a** and **2a** under the standard conditions with two different trapping agents (TEMPO or BHT) to capture the radical intermediates. No desired product **3aa/4aa** were detected in the above two controlled experiments, indicating that the reaction was completely inhibited. Meanwhile, a trapping product **7** was detected by the HRMS.

**HRMS-ESI (m/z):** calcd for C<sub>26</sub>H<sub>34</sub>F<sub>2</sub>NO<sub>4</sub>S<sup>+</sup> [M + H]<sup>+</sup> 494.2171, found 494.2162.



## (2) Deuterium Experiment.

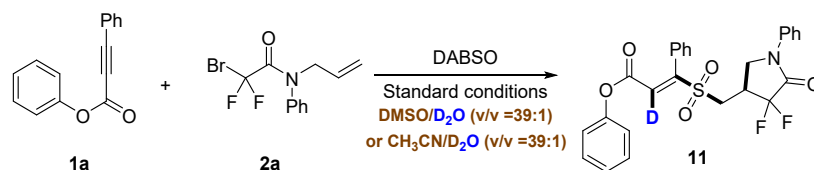

To a 10 mL schlenk-tube was charged with **1** (0.2 mmol, 1.0 equiv.), **2** (0.4 mmol, 2.0 equiv.), DABCO·(SO<sub>2</sub>)<sub>2</sub> (0.4 mmol, 2.0 equiv.) in DMSO/D<sub>2</sub>O or CH<sub>3</sub>CN/D<sub>2</sub>O (2 mL, v/v =39:1) under nitrogen atmosphere. The mixture was irradiated with 25 W blue LEDs under vigorous stirring at room temperature for 12 h. After the reaction completed, the reaction mixture was diluted with H<sub>2</sub>O (15 mL) and extracted with CH<sub>2</sub>Cl<sub>2</sub> (20 mL × 4). The combined organic layers were washed with brine (30 mL), dried over anhydrous Na<sub>2</sub>SO<sub>4</sub>, and concentrated in vacuo. The residue was purified by column chromatography on silica gel with petroleum ether/ethyl acetate to afford the desired product **11**.

<sup>1</sup>H NMR (400 MHz, DMSO-*d*<sub>6</sub>) δ 7.7–7.6 (m, 2H), 7.6–7.5 (m, 5H), 7.5–7.4 (m, 2H), 7.4–7.3 (m, 2H), 7.3 (t, *J* = 7.5 Hz, 1H), 7.2 (t, *J* = 7.4 Hz, 1H), 6.9 (d, *J* = 7.5 Hz, 2H), 4.1 (t, *J* = 10.0 Hz, 1H), 3.9 (t, *J* = 7.7 Hz, 1H), 3.7–3.6 (m, 1H), 3.6–3.5 (m, 2H).

HRMS-ESI (m/z): calcd for C<sub>26</sub>H<sub>20</sub>DF<sub>2</sub>NNaO<sub>5</sub>S<sup>+</sup> [M+Na]<sup>+</sup> 521.1063, found 521.1032.

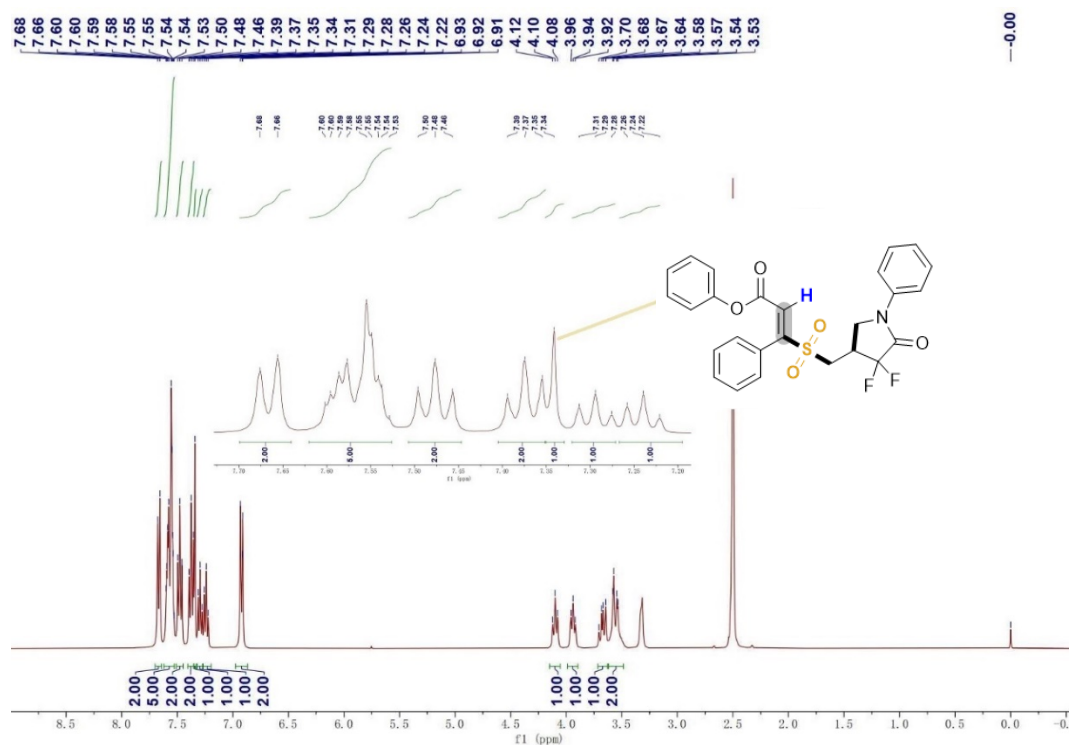

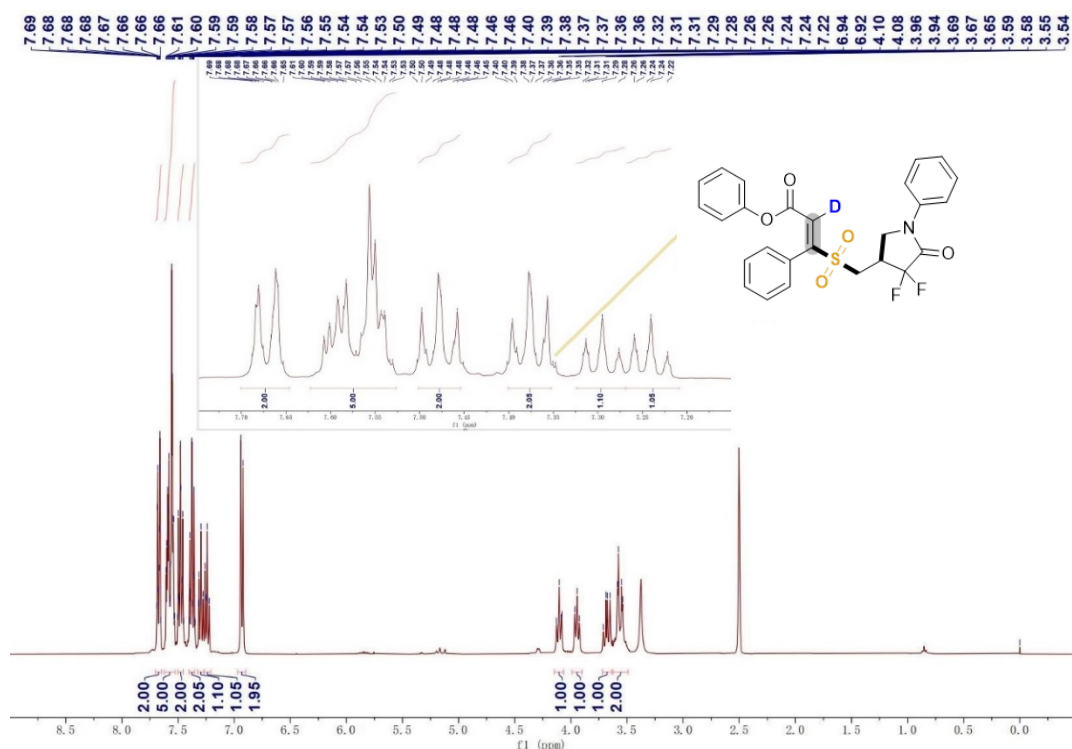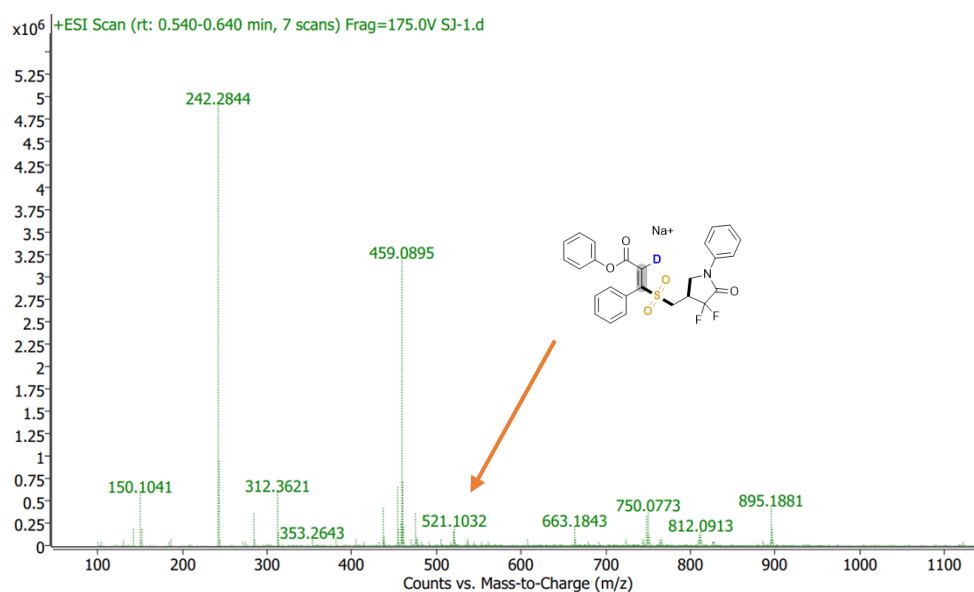

To a 10 mL schlenk-tube was charged with **1** (0.2 mmol, 1.0 equiv.), **2** (0.4 mmol, 2.0 equiv.), DABCO·(SO<sub>2</sub>)<sub>2</sub> (0.4 mmol, 2.0 equiv.) in CH<sub>3</sub>CN/CD<sub>3</sub>OD (2 mL, v/v =39:1) under nitrogen atmosphere. The mixture was irradiated with 25 W blue LEDs under vigorous stirring at room temperature for 12 h. After the reaction completed, the reaction mixture was diluted with H<sub>2</sub>O (15 mL) and extracted with CH<sub>2</sub>Cl<sub>2</sub> (20 mL × 4). The combined organic layers were washed with brine (30 mL), dried over anhydrous Na<sub>2</sub>SO<sub>4</sub>, and concentrated in vacuo. The residue was purified by column chromatography on silica gel with petroleum ether/ethyl acetate to afford the desired product **11**.

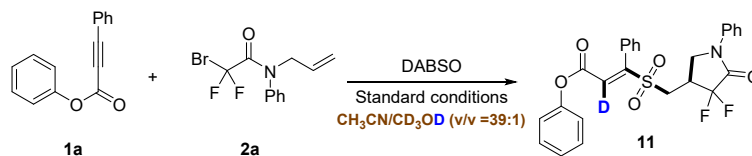

HRMS-ESI (m/z): calcd for  $[\text{C}_{26}\text{H}_{20}\text{DF}_2\text{NO}_5\text{S-K}]^+$  [M-K]<sup>+</sup> 459.0271 found 459.0273.

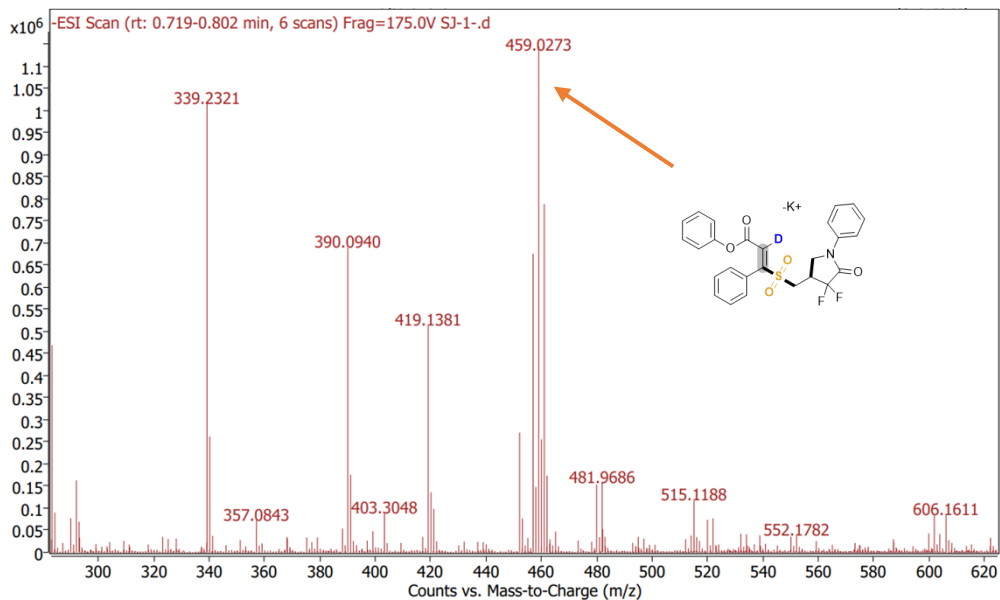

### (3) UV-vis absorption spectra.

UV-vis absorption spectra between **1a** (0.01 M), **2a** (0.01 M) and DABCO·(SO<sub>2</sub>)<sub>2</sub> (0.01 M) in 10 mL CH<sub>3</sub>CN were recorded in 1 cm path quartz cuvettes using a Shimadzu UV-2550 UV-vis spectrophotometer.

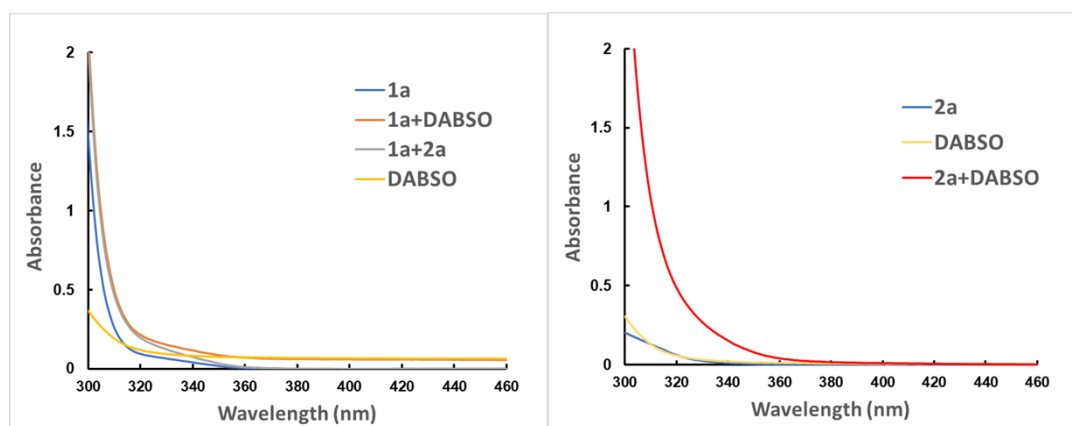

#### (4) On/off light experiments.

On/off experiments of model reaction in CH<sub>3</sub>CN (left) and DMSO/H<sub>2</sub>O (right).

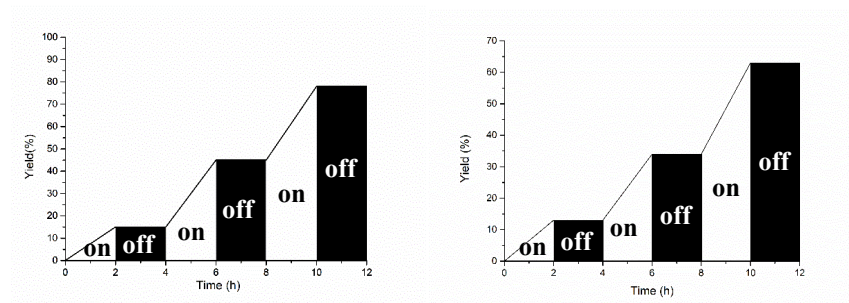

#### (5) Results for other substrates.

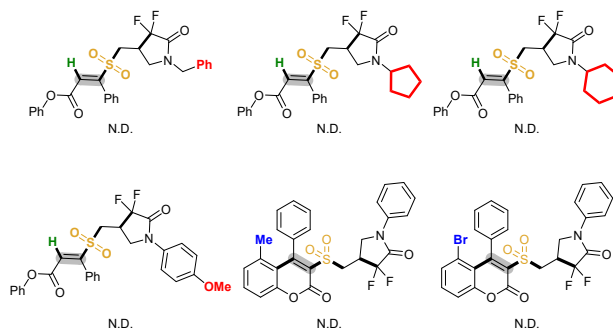

#### 6. References.

1. J. Meesin, P. Katrun, C. Pareseecharoen, M. Pohmakotr, V. Reutrakul, D. Soorukram, C. Kuhakarn, *J. Org. Chem.*, **2016**, 81, 2744-2752.
2. K. Sun, S. N. Wang, R. R. Feng, Y. X. Zhang, X. Wang, Z. G. Zhang, B. Zhang, *Org. Lett.*, **2019**, 21, 2052-2055.
3. X. Y. Gou, Y. Li, Y. Y. Luan, W. Y. Shi, Y. M. Liang, *ACS Catal.*, **2021**, 11, 4263-427.
4. (a) P. G. Jessop, *Green Chem.*, 2011, **13**, 1391-1398. (b) S. U. Hong, Y. Wang, L. S. Soh and W. F. Yong, *Green Chem.*, 2023, **25**, 4501-4512. (c) J. Pawlas, B. Antonic, M. Lundqvist, T. Svensson, J. Finnman and J. H. Rasmussen, *Green Chem.*, 2019, **21**, 2594-2600.

## 7. Characterization data for the products.

### (*E*)-phenyl-2-(((4,4-difluoro-5-oxo-1-phenylpyrrolidin-3-yl)methyl)sulfonyl)-3-phenylacrylate (**3aa**).

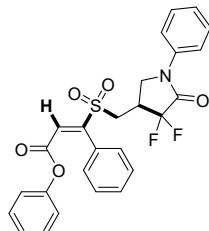

The product was purified by silica gel column chromatography with petroleum ether/ethyl acetate (12:1). White solid; m.p.: 230.3-233.1 °C; 76% yield;

<sup>1</sup>H NMR (400 MHz, DMSO-*d*<sub>6</sub>) δ 7.67 (d, *J* = 8.0 Hz, 2H), 7.63 – 7.50 (m, 5H), 7.48 (t, *J* = 7.8 Hz, 2H), 7.37 (t, *J* = 8.0 Hz, 2H), 7.34 (s, 1H), 7.29 (t, *J* = 7.4 Hz, 1H), 7.24 (t, *J* = 7.4 Hz, 1H), 6.92 (d, *J* = 8.2 Hz, 2H), 4.10 (t, *J* = 8.8 Hz, 1H), 3.94 (t, *J* = 7.8 Hz, 1H), 3.67 (dd, *J* = 14.8, 9.4 Hz, 1H), 3.61 – 3.52 (m, 2H).

<sup>13</sup>C NMR (101 MHz, DMSO) δ 161.8, 160.5 (t, *J*<sub>C-F</sub> = 32.2 Hz), 151.0, 149.6, 137.5, 130.3, 129.5, 129.4, 129.4, 129.2, 129.1, 128.6, 126.2, 126.1, 121.1, 120.2, 116.9 (t, *J*<sub>C-F</sub> = 249.4 Hz), 47.4 (d, *J*<sub>C-F</sub> = 5.9 Hz), 47.2 (d, *J*<sub>C-F</sub> = 7.0 Hz), 33.2 (t, *J*<sub>C-F</sub> = 20.2 Hz).

<sup>19</sup>F NMR (376 MHz, DMSO-*d*<sub>6</sub>) δ -107.73 (d, *J* = 262.9 Hz, 1F), -112.34 (d, *J* = 262.9 Hz, 1F).

HRMS-ESI (*m/z*): calcd for C<sub>26</sub>H<sub>22</sub>F<sub>2</sub>NO<sub>5</sub>S<sup>+</sup> [M+H]<sup>+</sup> 498.1181, found 498.1178.

### (*E*)-phenyl-2-(((4,4-difluoro-1-(4-fluorophenyl)-5-oxopyrrolidin-3-yl)methyl)sulfonyl)-3-phenyl-acrylate (**3ab**).

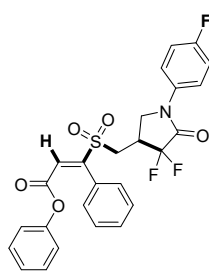

The product was purified by silica gel column chromatography with petroleum ether/ethyl acetate (12:1). White solid; m.p.: 168.1-169.7 °C; 54% yield;

<sup>1</sup>H NMR (400 MHz, DMSO-*d*<sub>6</sub>) δ 7.78 – 7.65 (m, 2H), 7.61 – 7.53 (m, 5H), 7.44 – 7.29 (m, 5H), 7.24 (t, *J* = 7.4 Hz, 1H), 6.92 (dd, *J* = 7.7, 1.6 Hz, 2H), 4.08 (t, *J* = 8.7 Hz, 1H), 3.93 (ddd, *J* = 9.7, 7.2, 2.1 Hz, 1H), 3.72 – 3.43 (m, 3H).

<sup>13</sup>C NMR (101 MHz, DMSO) δ 161.8, 160.4 (t, *J*<sub>C-F</sub> = 31.2 Hz), 158.5, 151.0, 149.5, 133.9 (d, *J*<sub>C-F</sub> = 2.9 Hz), 130.3, 129.5, 129.4 (d, *J*<sub>C-F</sub> = 5.6 Hz), 129.2, 128.6, 126.2, 122.6, 122.5, 121.1, 116.7 (t,

$J_{C-F} = 252.5$  Hz), 115.9 (d,  $J_{C-F} = 22.7$  Hz), 47.7 (d,  $J_{C-F} = 5.0$  Hz), 47.2 (d,  $J_{C-F} = 6.0$  Hz), 33.2 (t,  $J_{C-F} = 20.2$  Hz).

$^{19}\text{F}$  NMR (376 MHz, DMSO- $d_6$ )  $\delta$  -107.73 (d,  $J = 263.0$  Hz, 1F), -112.26 (d,  $J = 263.1$  Hz, 1F), -115.44 (s, 1F).

HRMS-ESI (m/z): calcd for  $\text{C}_{26}\text{H}_{21}\text{F}_3\text{NO}_5\text{S}^+ [\text{M}+\text{H}]^+ 516.1087$ , found 516.1081.

**(E)-phenyl-2-(((1-(4-chlorophenyl)-4,4-difluoro-5-oxopyrrolidin-3-yl)methyl)sulfonyl)-3-phenyl-acrylate (3ac).**

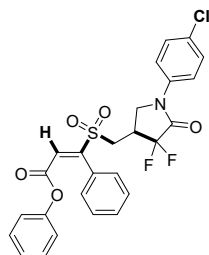

The product was purified by silica gel column chromatography with petroleum ether/ethyl acetate (12:1). White solid; m.p.: 179.0-180.7 °C; 58% yield;

$^1\text{H}$  NMR (400 MHz, DMSO- $d_6$ )  $\delta$  7.71 (d,  $J = 7.0$  Hz, 2H), 7.60 – 7.52 (m, 7H), 7.37 (q,  $J = 7.0$ , 6.2 Hz, 3H), 7.24 (t,  $J = 7.4$  Hz, 1H), 6.92 (d,  $J = 7.0$  Hz, 2H), 4.09 (t,  $J = 8.6$  Hz, 1H), 3.93 (t,  $J = 8.4$  Hz, 1H), 3.73 – 3.44 (m, 3H).

$^{13}\text{C}$  NMR (101 MHz, DMSO)  $\delta$  161.8, 160.5 (t,  $J_{C-F} = 31.2$  Hz), 151.0, 149.5, 136.4, 130.3, 130.0, 129.5, 129.4, 129.4, 129.2, 129.0, 128.6, 126.2, 121.8, 121.1, 116.8 (t,  $J_{C-F} = 250.4$  Hz), 47.4 (d,  $J_{C-F} = 5.0$  Hz), 47.2 (d,  $J_{C-F} = 7.0$  Hz), 33.1 (t,  $J_{C-F} = 20.2$  Hz).

$^{19}\text{F}$  NMR (376 MHz, DMSO- $d_6$ )  $\delta$  -107.77 (d,  $J = 263.2$  Hz, 1F), -112.20 (d,  $J = 263.2$  Hz, 1F).

HRMS-ESI (m/z): calcd for  $\text{C}_{26}\text{H}_{21}\text{ClF}_2\text{NO}_5\text{S}^+ [\text{M}+\text{H}]^+ 532.0792$ , found 532.0788.

**(E)-phenyl-2-(((1-(4-bromophenyl)-4,4-difluoro-5-oxopyrrolidin-3-yl)methyl)sulfonyl)-3-phenyl-acrylate (3ad).**

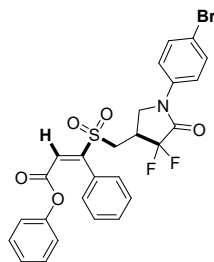

The product was purified by silica gel column chromatography with petroleum ether/ethyl acetate (12:1). White solid; m.p.: 173.2-175.9 °C; 67% yield;

$^1\text{H}$  NMR (400 MHz, DMSO- $d_6$ )  $\delta$  7.71 – 7.62 (m, 4H), 7.63 – 7.50 (m, 5H), 7.37 (dd,  $J = 15.4$ , 7.2 Hz, 3H), 7.24 (t,  $J = 7.4$  Hz, 1H), 6.92 (d,  $J = 7.6$  Hz, 2H), 4.10 (t,  $J = 9.0$  Hz, 1H), 3.93 (t,  $J = 7.4$  Hz, 1H), 3.78 – 3.46 (m, 3H).

$^{13}\text{C}$  NMR (101 MHz, DMSO)  $\delta$  161.8, 160.6 (t,  $J_{\text{C-F}} = 32.2$  Hz), 151.0, 149.5, 136.8, 131.9, 130.3, 129.5, 129.4, 129.4, 129.2, 128.6, 126.2, 122.1, 121.1, 118.3, 116.7 (t,  $J_{\text{C-F}} = 250.4$  Hz), 47.3 (d,  $J_{\text{C-F}} = 7.0$  Hz), 47.2 (d,  $J_{\text{C-F}} = 7.0$  Hz), 33.1 (t,  $J_{\text{C-F}} = 20.2$  Hz).

$^{19}\text{F}$  NMR (376 MHz, DMSO- $d_6$ )  $\delta$  -107.78 (d,  $J = 262.9$  Hz, 1F), -112.19 (d,  $J = 262.9$  Hz, 1F).

HRMS-ESI (m/z): calcd for  $\text{C}_{26}\text{H}_{21}\text{BrF}_2\text{NO}_5\text{S}^+ [\text{M}+\text{H}]^+ 576.0286$ , found 576.0280.

**(E)-phenyl-3-(((4,4-difluoro-5-oxo-1-(p-tolyl)pyrrolidin-3-yl)methyl)sulfonyl)-3-phenylacrylate (3ae).**

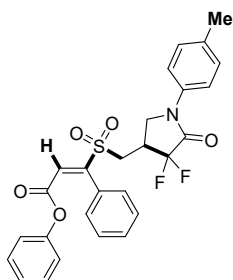

The product was purified by silica gel column chromatography with petroleum ether/ethyl acetate (12:1). White solid; m.p.: 183.0-185.1 °C; 61% yield;

$^1\text{H}$  NMR (600 MHz, DMSO- $d_6$ )  $\delta$  7.6 (dd,  $J = 7.0, 2.7$  Hz, 2H), 7.5 (d,  $J = 7.9$  Hz, 5H), 7.4 (t,  $J = 8.0$  Hz, 2H), 7.3 (s, 1H), 7.3 (d,  $J = 8.2$  Hz, 2H), 7.2 (t,  $J = 7.4$  Hz, 1H), 6.9 (d,  $J = 8.0$  Hz, 2H), 4.1 (t,  $J = 9.2$  Hz, 1H), 3.9 (t,  $J = 9.6$  Hz, 1H), 3.7 (dd,  $J = 14.8, 9.3$  Hz, 1H), 3.5 (dd,  $J = 14.9, 4.0$  Hz, 2H), 2.3 (s, 3H).

$^{13}\text{C}$  NMR (151 MHz, DMSO)  $\delta$  161.8, 160.4 (t,  $J_{\text{C-F}} = 31.2$  Hz), 151.0, 149.6, 135.5, 135.1, 130.3, 129.5, 129.4, 129.4, 129.2, 128.6, 126.2, 121.1, 120.1, 117.0 (t,  $J_{\text{C-F}} = 249.5$  Hz), 47.4 (d,  $J_{\text{C-F}} = 5.0$  Hz), 47.3 (d,  $J_{\text{C-F}} = 6.8$  Hz), 33.2 (t,  $J_{\text{C-F}} = 21.2$  Hz), 20.4.

$^{19}\text{F}$  NMR (565 MHz, DMSO- $d_6$ )  $\delta$  -107.64 (d,  $J = 262.8$  Hz, 1F), -112.18 (d,  $J = 262.4$  Hz, 1F).

HRMS-ESI (m/z): calcd for  $\text{C}_{27}\text{H}_{24}\text{F}_2\text{NO}_5\text{S}^+ [\text{M}+\text{H}]^+ 512.1338$ , found 512.1331.

**(E)-phenyl-2-(((1-(4-(tert-butyl)phenyl)-4,4-difluoro-5-oxopyrrolidin-3-yl)methyl)sulfonyl)-3-phenylacrylate (3af).**

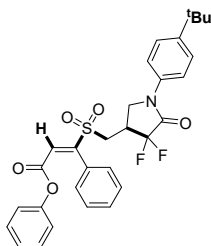

The product was purified by silica gel column chromatography with petroleum ether/ethyl acetate (12:1). White solid; m.p.: 193.4-194.7 °C; 59% yield;

$^1\text{H}$  NMR (400 MHz, DMSO- $d_6$ )  $\delta$  7.63 – 7.50 (m, 7H), 7.48 (d,  $J = 8.8$  Hz, 2H), 7.40 – 7.32 (m, 3H), 7.27 – 7.21 (m, 1H), 6.92 (d,  $J = 7.4$  Hz, 2H), 4.08 (t,  $J = 9.8$  Hz, 1H), 3.91 (ddd,  $J = 9.0, 6.9, 1.9$  Hz, 1H), 3.67 (dd,  $J = 14.8, 9.3$  Hz, 1H), 3.55 (dd,  $J = 14.9, 4.0$  Hz, 2H), 1.29 (s, 9H).

$^{13}\text{C}$  NMR (101 MHz, DMSO)  $\delta$  161.7, 160.3 (t,  $J_{\text{C-F}} = 31.2$  Hz), 151.0, 149.5, 148.7, 135.0, 130.2, 129.5, 129.4, 129.4, 129.2, 128.6, 126.2, 125.7, 121.1, 120.0, 116.9 (t,  $J_{\text{C-F}} = 249.4$  Hz), 47.4 (d,  $J_{\text{C-F}} = 5.9$  Hz), 47.3 (d,  $J_{\text{C-F}} = 7.0$  Hz), 34.2, 33.3 (t,  $J_{\text{C-F}} = 20.2$  Hz), 31.0.

$^{19}\text{F}$  NMR (376 MHz, DMSO- $d_6$ )  $\delta$  -107.69 (d,  $J = 262.9$  Hz, 1F), -112.35 (d,  $J = 262.8$  Hz, 1F).

HRMS-ESI (m/z): calcd for  $\text{C}_{30}\text{H}_{30}\text{F}_2\text{NO}_5\text{S}^+ [\text{M}+\text{H}]^+ 554.1807$ , found 554.1800.

**(E)-phenyl-2-(((1-(3-bromophenyl)-4,4-difluoro-5-oxopyrrolidin-3-yl)methyl)sulfonyl)-3-phenyl-acrylate (3ag).**

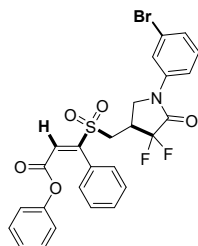

The product was purified by silica gel column chromatography with petroleum ether/ethyl acetate (12:1). White solid; m.p.: 160.7-164.3 °C; 70% yield;

$^1\text{H}$  NMR (400 MHz, DMSO- $d_6$ )  $\delta$  7.9 (s, 1H), 7.6 (d,  $J = 8.2$  Hz, 1H), 7.6 – 7.5 (m, 6H), 7.4 (t,  $J = 8.1$  Hz, 1H), 7.4 (t,  $J = 7.7$  Hz, 2H), 7.3 (s, 1H), 7.2 (t,  $J = 7.5$  Hz, 1H), 6.9 (d,  $J = 7.9$  Hz, 2H), 4.1 (t,  $J = 9.3$  Hz, 1H), 3.9 (t,  $J = 8.9$  Hz, 1H), 3.7 – 3.4 (m, 3H).

$^{13}\text{C}$  NMR (101 MHz, DMSO)  $\delta$  161.8, 160.8 (t,  $J_{\text{C-F}} = 33.2$  Hz), 150.9, 149.6, 148.5, 139.0, 131.1, 130.3, 129.6, 129.5, 129.2, 128.9, 128.7, 126.3, 122.8, 121.7, 121.1, 119.1, 117.0 (t,  $J_{\text{C-F}} = 249.5$  Hz), 47.4, 47.1, 33.2 (t,  $J_{\text{C-F}} = 20.2$  Hz).

$^{19}\text{F}$  NMR (376 MHz, DMSO- $d_6$ )  $\delta$  -107.9 (d,  $J = 263.2$  Hz, 1F), -112.3 (d,  $J = 263.1$  Hz, 1F).

HRMS-ESI (m/z): calcd for  $\text{C}_{26}\text{H}_{21}\text{BrF}_2\text{NO}_5\text{S}^+ [\text{M}+\text{H}]^+ 576.0286$ , found 576.0280.

**(E)-phenyl-2-(((1-(3,5-dimethylphenyl)-4,4-difluoro-5-oxopyrrolidin-3-yl)methyl)sulfonyl)-3-phenylacrylate (3ah).**

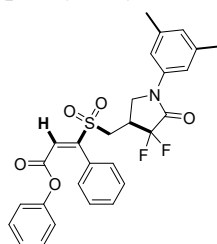

The product was purified by silica gel column chromatography with petroleum ether/ethyl acetate (12:1). White solid; m.p.: 145.2-148.1 °C; 74% yield;

$^1\text{H}$  NMR (400 MHz, DMSO- $d_6$ )  $\delta$  7.6 – 7.5 (m, 5H), 7.4 (t,  $J = 7.7$  Hz, 2H), 7.3 (d,  $J = 3.6$  Hz, 1H), 7.3 (s, 2H), 7.2 (t,  $J = 8.0$  Hz, 1H), 6.9 (d,  $J = 8.4$  Hz, 3H), 4.1 (t,  $J = 9.5$  Hz, 1H), 3.9 (t,  $J = 8.9$  Hz, 1H), 3.7 – 3.6 (m, 1H), 3.6 – 3.5 (m, 2H), 2.3 (s, 6H).

$^{13}\text{C}$  NMR (101 MHz, DMSO)  $\delta$  161.8, 160.4 (t,  $J_{\text{C-F}} = 31.2$  Hz), 151.0, 149.6, 147.1, 138.3, 137.5, 130.3, 129.6, 129.5, 129.3, 128.7, 127.6, 126.3, 121.2, 118.0, 117.0 (t,  $J_{\text{C-F}} = 254.5$  Hz), 47.6 (d,  $J_{\text{C-F}} = 5.9$  Hz), 47.2 (d,  $J_{\text{C-F}} = 7.0$  Hz), 33.2 (t,  $J_{\text{C-F}} = 20.2$  Hz), 21.0.



$^{19}\text{F}$  NMR (376 MHz, DMSO- $d_6$ )  $\delta$  -107.8 (d,  $J$  = 262.3 Hz, 1F), -112.4 (d,  $J$  = 262.5 Hz, 1F).

HRMS-ESI (m/z): calcd for  $\text{C}_{28}\text{H}_{26}\text{F}_2\text{NO}_5\text{S}^+$  [M+H] $^+$  526.1494, found 526.1488.

**(E)-phenyl2-(((4,4-difluoro-1-(naphthalen-2-yl)-5-oxopyrrolidin-3-yl)methyl)sulfonyl)-3-phenyl-acrylate (3ai).**

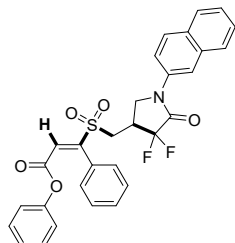

The product was purified by silica gel column chromatography with petroleum ether/ethyl acetate (12:1). White solid; m.p.: 167.3-169.0 °C; 47% yield;

$^1\text{H}$  NMR (400 MHz, DMSO- $d_6$ )  $\delta$  8.1 (s, 1H), 8.1 – 7.9 (m, 4H), 7.7 – 7.5 (m, 7H), 7.4 – 7.3 (m, 3H), 7.2 (t,  $J$  = 7.4 Hz, 1H), 6.9 (d,  $J$  = 7.9 Hz, 2H), 4.2 (t,  $J$  = 9.1 Hz, 1H), 4.1 (t,  $J$  = 8.8 Hz, 1H), 3.8 – 3.7 (m, 1H), 3.6 (d,  $J$  = 11.9 Hz, 2H).

$^{13}\text{C}$  NMR (101 MHz, DMSO)  $\delta$  161.8, 160.7 (t,  $J_{\text{C-F}}$  = 31.2 Hz), 151.0, 149.6, 135.3, 133.9, 132.8, 130.9, 130.3, 129.6, 129.5, 129.3, 128.8, 128.7, 127.9, 127.5, 126.9, 126.3, 126.1, 121.2, 119.4, 117.7, 117.0 (t,  $J_{\text{C-F}}$  = 247.5 Hz), 47.7 (d,  $J_{\text{C-F}}$  = 6.1 Hz), 47.3 (d,  $J_{\text{C-F}}$  = 7.1 Hz), 33.3 (t,  $J_{\text{C-F}}$  = 19.2 Hz).

$^{19}\text{F}$  NMR (376 MHz, DMSO- $d_6$ )  $\delta$  -107.7 (d,  $J$  = 262.9 Hz, 1F), -112.1 (d,  $J$  = 262.8 Hz, 1F).

HRMS-ESI (m/z): calcd for  $\text{C}_{30}\text{H}_{24}\text{F}_2\text{NO}_5\text{S}^+$  [M+H] $^+$  548.1338, found 548.1332.

**(E)-4-chlorophenyl-2-(((4,4-difluoro-5-oxo-1-phenylpyrrolidin-3-yl)methyl)sulfonyl)-3-phenyl-acrylate (3ba).**

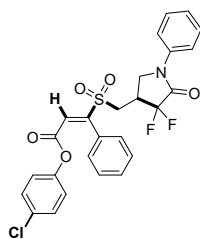

The product was purified by silica gel column chromatography with petroleum ether/ethyl acetate (12:1). White solid; m.p.: 71.2-174.0 °C; 61% yield;

$^1\text{H}$  NMR (400 MHz, DMSO- $d_6$ )  $\delta$  7.7 (d,  $J$  = 8.0 Hz, 2H), 7.6 – 7.5 (m, 5H), 7.5 – 7.4 (m, 4H), 7.3 (d,  $J$  = 6.3 Hz, 2H), 7.0 (d,  $J$  = 8.3 Hz, 2H), 4.1 (t,  $J$  = 9.1 Hz, 1H), 3.9 (t,  $J$  = 8.6 Hz, 1H), 3.7 (dd,  $J$  = 14.9, 9.4 Hz, 1H), 3.6 – 3.5 (m, 2H).

$^{13}\text{C}$  NMR (101 MHz, DMSO)  $\delta$  161.6, 160.5 (t,  $J_{\text{C-F}}$  = 30.2 Hz), 151.3, 148.3, 137.6, 130.5, 130.4, 130.0, 129.5, 129.5, 129.2, 129.1, 128.7, 126.2, 123.1, 120.2, 116.9 (t,  $J_{\text{C-F}}$  = 248.5 Hz), 47.4 (d,  $J_{\text{C-F}}$  = 7.1 Hz), 47.2 (d,  $J_{\text{C-F}}$  = 6.0 Hz), 33.2 (t,  $J_{\text{C-F}}$  = 21.2 Hz).

$^{19}\text{F}$  NMR (376 MHz, DMSO- $d_6$ )  $\delta$  -107.8 (d,  $J$  = 262.5 Hz, 1F), -112.3 (d,  $J$  = 262.8 Hz, 1F).

HRMS-ESI (m/z): calcd for  $\text{C}_{26}\text{H}_{21}\text{ClF}_2\text{NO}_5\text{S}^+$  [M+H] $^+$  532.0792, found 532.0788.

**(E)-4-(trifluoromethyl)phenyl-2-(((4,4-difluoro-5-oxo-1-phenylpyrrolidin-3-yl)methyl)sulfonyl)-3-phenylacrylate (3ca).**

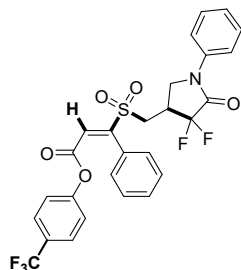

The product was purified by silica gel column chromatography with petroleum ether/ethyl acetate (12:1). White solid; m.p.: 273.8-276.3 °C; 53% yield;

**<sup>1</sup>H NMR** (400 MHz, DMSO-*d*<sub>6</sub>) δ 7.8 (d, *J* = 8.3 Hz, 2H), 7.7 (d, *J* = 8.0 Hz, 2H), 7.6 – 7.5 (m, 5H), 7.5 (t, *J* = 7.8 Hz, 2H), 7.4 – 7.3 (m, 2H), 7.2 (d, *J* = 8.3 Hz, 2H), 4.1 (t, *J* = 9.2 Hz, 1H), 3.9 (t, *J* = 8.5 Hz, 1H), 3.7 (dd, *J* = 14.9, 9.5 Hz, 2H), 3.5 (d, *J* = 15.0 Hz, 2H).

**<sup>13</sup>C NMR** (101 MHz, DMSO) δ 161.3, 160.5 (t, *J*<sub>C-F</sub> = 30.2 Hz), 152.5, 151.6, 137.6, 130.4, 129.5, 129.1, 129.0, 128.7, 127.1, 127.1, 126.2, 122.3, 120.2, 116.9 (t, *J*<sub>C-F</sub> = 257.5 Hz), 47.4 (d, *J*<sub>C-F</sub> = 6.1 Hz), 47.2 (d, *J*<sub>C-F</sub> = 7.1 Hz), 33.2 (t, *J*<sub>C-F</sub> = 21.2 Hz).

**<sup>19</sup>F NMR** (376 MHz, DMSO-*d*<sub>6</sub>) δ -60.8 (s, 3F), -107.8 (d, *J* = 262.7 Hz, 1F), -112.3 (d, *J* = 262.7 Hz, 1F).

**HRMS-ESI (m/z):** calcd for C<sub>27</sub>H<sub>21</sub>F<sub>5</sub>NO<sub>5</sub>S<sup>+</sup> [M+H]<sup>+</sup> 566.1055, found 566.1051.

**(E)-*p*-tolyl-2-(((4,4-difluoro-5-oxo-1-phenylpyrrolidin-3-yl)methyl)sulfonyl)-3-phenylacrylate (3da).**

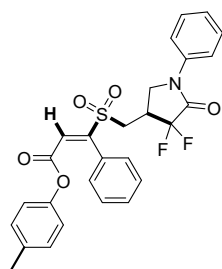

The product was purified by silica gel column chromatography with petroleum ether/ethyl acetate (12:1). White solid; m.p.: 251.9-254.5 °C; 48% yield;

**<sup>1</sup>H NMR** (400 MHz, DMSO-*d*<sub>6</sub>) δ 7.7 (d, *J* = 8.1 Hz, 2H), 7.6 (d, *J* = 8.3 Hz, 5H), 7.5 (t, *J* = 7.9 Hz, 2H), 7.3 (dd, *J* = 14.7, 5.4 Hz, 2H), 7.2 (d, *J* = 8.0 Hz, 2H), 6.8 (d, *J* = 8.3 Hz, 2H), 4.1 (t, *J* = 9.1 Hz, 1H), 3.9 (t, *J* = 8.6 Hz, 1H), 3.7 (dd, *J* = 14.9, 9.5 Hz, 1H), 3.5 (d, *J* = 14.9 Hz, 2H), 2.3 (s, 3H).

**<sup>13</sup>C NMR** (101 MHz, DMSO) δ 162.0, 160.5 (t, *J*<sub>C-F</sub> = 31.2 Hz), 150.8, 147.4, 137.6, 135.6, 130.3, 129.9, 129.6, 129.5, 129.3, 129.1, 128.7, 126.2, 120.8, 120.2, 116.9 (t, *J*<sub>C-F</sub> = 254.5 Hz), 47.4 (d, *J*<sub>C-F</sub> = 5.6 Hz), 47.2 (d, *J*<sub>C-F</sub> = 7.1 Hz), 33.2 (t, *J*<sub>C-F</sub> = 20.2 Hz), 20.3.

**<sup>19</sup>F NMR** (376 MHz, DMSO-*d*<sub>6</sub>) δ -107.8 (d, *J* = 262.3 Hz, 1F), -112.3 (d, *J* = 262.3 Hz, 1F).

**HRMS-ESI (m/z):** calcd for  $C_{27}H_{24}F_2NO_5S^+$  [M+H]<sup>+</sup> 512.1338, found 512.1331.

**(E)-4-methoxyphenyl-2-(((4,4-difluoro-5-oxo-1-phenylpyrrolidin-3-yl)methyl)sulfonyl)-3-phenyl-acrylate (3ea).**

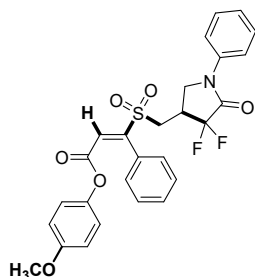

The product was purified by silica gel column chromatography with petroleum ether/ethyl acetate (12:1). White solid; m.p.: 179.7-181.1 °C; 49% yield;

**<sup>1</sup>H NMR** (400 MHz, DMSO-*d*<sub>6</sub>) δ 7.7 (d, *J* = 7.6 Hz, 2H), 7.6 – 7.5 (m, 5H), 7.5 (m, 2H), 7.3 – 7.3 (m, 2H), 6.9 (d, *J* = 9.2 Hz, 2H), 6.8 (d, *J* = 9.1 Hz, 2H), 4.1 (ddd, *J* = 9.9, 8.2, 1.8 Hz, 1H), 3.9 (td, *J* = 7.6, 3.8 Hz, 1H), 3.7 (s, 3H), 3.7 – 3.6 (m, 1H), 3.6 – 3.5 (m, 2H).

**<sup>13</sup>C NMR** (101 MHz, DMSO) δ 162.2, 160.5 (t, *J*<sub>C-F</sub> = 30.2 Hz), 157.1, 150.7, 142.9, 137.6, 130.3, 129.6, 129.5, 129.3, 129.1, 128.7, 126.2, 122.0, 120.2, 117.0 (t, *J*<sub>C-F</sub> = 249.5 Hz), 114.5, 55.4, 47.4 (d, *J*<sub>C-F</sub> = 6.6 Hz), 47.2 (d, *J*<sub>C-F</sub> = 7.4 Hz), 33.2 (t, *J*<sub>C-F</sub> = 21.2 Hz).

**<sup>19</sup>F NMR** (376 MHz, DMSO-*d*<sub>6</sub>) δ -107.8 (d, *J* = 262.8 Hz, 1F), -112.3 (d, *J* = 262.8 Hz, 1F).

**HRMS-ESI (m/z):** calcd for  $C_{27}H_{24}F_2NO_6S^+$  [M+H]<sup>+</sup> 528.1287, found 528.1283.

**(E)-3-chlorophenyl-2-(((4,4-difluoro-5-oxo-1-phenylpyrrolidin-3-yl)methyl)sulfonyl)-3-phenyl-acrylate (3fa).**

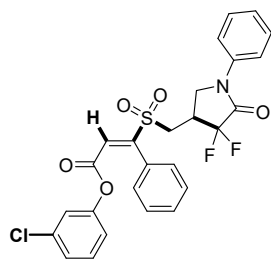

The product was purified by silica gel column chromatography with petroleum ether/ethyl acetate (12:1). White solid; m.p.: 152.1-154.5 °C; 60% yield;

**<sup>1</sup>H NMR** (400 MHz, DMSO-*d*<sub>6</sub>) δ 7.7 (d, *J* = 8.0 Hz, 2H), 7.6 – 7.5 (m, 5H), 7.5 (t, *J* = 7.7 Hz, 2H), 7.4 (t, *J* = 8.3 Hz, 1H), 7.4 – 7.2 (m, 3H), 7.1 (s, 1H), 6.9 (d, *J* = 8.1 Hz, 1H), 4.1 (t, *J* = 9.2 Hz, 1H), 3.9 (t, *J* = 8.6 Hz, 1H), 3.7 (dd, *J* = 14.9, 9.4 Hz, 1H), 3.6 (d, *J* = 14.8 Hz, 2H).

**<sup>13</sup>C NMR** (101 MHz, DMSO) δ 161.5, 160.5 (t, *J*<sub>C-F</sub> = 29.2 Hz), 151.5, 150.2, 137.6, 133.3, 131.1, 130.4, 129.5, 129.2, 129.1, 129.0, 128.7, 126.5, 126.2, 122.4, 121.6, 120.2, 116.9 (t, *J*<sub>C-F</sub> = 249.5 Hz), 47.4 (d, *J*<sub>C-F</sub> = 6.1 Hz), 47.2 (d, *J*<sub>C-F</sub> = 7.1 Hz), 33.2 (t, *J*<sub>C-F</sub> = 20.2 Hz).

**<sup>19</sup>F NMR** (376 MHz, DMSO-*d*<sub>6</sub>) δ -107.7 (d, *J* = 262.8 Hz, 1F), -112.3 (d, *J* = 262.4 Hz, 1F).

**HRMS-ESI (m/z):** calcd for  $C_{26}H_{21}ClF_2NO_5S^+$   $[M+H]^+$  532.0792, found 532.0788.

**4-(2-hydrosulfonylpropan-2-yl)-3,3-dimethyl-1-phenylpyrrolidin-2-one (3ap).**

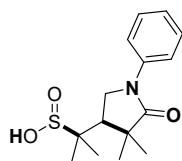

The product was purified by silica gel column chromatography with petroleum ether/ethyl acetate (12:1). Yellow solid; m.p.: 89.9-92.7 °C; 35% yield;

**<sup>1</sup>H NMR** (400 MHz, DMSO-*d*<sub>6</sub>) δ 7.7 – 7.7 (m, 2H), 7.4 (dd, *J* = 8.6, 7.3 Hz, 2H), 7.2 – 7.1 (m, 1H), 3.8 (t, *J* = 9.9 Hz, 1H), 3.7 (dd, *J* = 9.7, 7.9 Hz, 1H), 2.1 (dd, *J* = 10.2, 7.9 Hz, 1H), 1.3 (d, *J* = 6.2 Hz, 6H), 1.2 (s, 3H), 1.1 (s, 3H).

**<sup>13</sup>C NMR** (101 MHz, DMSO) δ 178.4, 139.8, 128.6, 123.8, 119.3, 69.7, 51.7, 46.3, 44.7, 30.3, 29.0, 26.5, 20.4.

**HRMS-ESI (m/z):** calcd for  $C_{15}H_{22}NO_3S^+$   $[M+H]^+$  296.1315, found 296.1310.

**3,3-difluoro-4-(hydrosulfonylmethyl)-1-phenylpyrrolidin-2-one (3ma).**

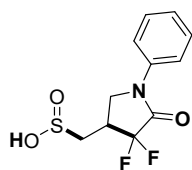

The product was purified by silica gel column chromatography with petroleum ether/ethyl acetate (12:1). Light yellow oil; 43% yield;

**<sup>1</sup>H NMR** (400 MHz, DMSO-*d*<sub>6</sub>) δ 7.7 (dd, *J* = 8.7, 1.2 Hz, 2H), 7.6 – 7.4 (m, 2H), 7.4 – 7.3 (m, 1H), 4.7 (ddd, *J* = 15.2, 5.8, 4.5 Hz, 1H), 4.5 (dt, *J* = 15.6, 8.1 Hz, 1H), 4.1 (ddd, *J* = 10.3, 8.6, 2.0 Hz, 1H), 3.9 (ddd, *J* = 10.0, 7.7, 2.4 Hz, 1H), 3.7 (m, 1H).

**<sup>13</sup>C NMR** (101 MHz, DMSO) δ 160.5 (t, *J*<sub>C-F</sub> = 30.2 Hz), 137.5, 129.2, 126.3, 120.3, 116.6 (t, *J*<sub>C-F</sub> = 250.5 Hz), 46.9 (d, *J*<sub>C-F</sub> = 6.3 Hz), 46.2 (dd, *J*<sub>C-F</sub> = 16.8, 9.1 Hz), 34.2 (t, *J*<sub>C-F</sub> = 19.2 Hz).

**<sup>19</sup>F NMR** (376 MHz, DMSO-*d*<sub>6</sub>) δ -107.6 (dd, *J* = 264.5, 3.4 Hz, 1F), -112.5 (dd, *J* = 264.5, 4.3 Hz, 1F).

**HRMS-ESI (m/z):** calcd for  $C_{11}H_{12}F_2NO_3S^+$   $[M+H]^+$  276.0500, found 276.0496.

**3,3-difluoro-4-(((2-oxo-4-phenyl-2H-chromen-3-yl)sulfonyl)methyl)-1-phenylpyrrolidin-2-one (4aa).**

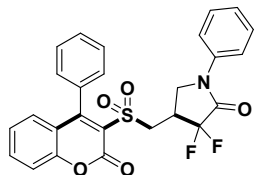

The product was purified by silica gel column chromatography with petroleum ether/ethyl acetate (8:1). White solid; m.p.: 203.0-206.7 °C; 90% yield;

**<sup>1</sup>H NMR** (400 MHz, DMSO-*d*<sub>6</sub>) δ 7.8 (t, *J* = 7.0 Hz, 1H), 7.6 (d, *J* = 7.7 Hz, 3H), 7.6 – 7.4 (m, 5H), 7.4 – 7.3 (m, 3H), 7.3 (t, *J* = 7.4 Hz, 1H), 6.9 (d, *J* = 8.2 Hz, 1H), 4.2 (dd, *J* = 14.6, 4.2 Hz, 1H), 3.9 (t, *J* = 8.4 Hz, 1H), 3.9 – 3.8 (m, 2H), 3.7 – 3.5 (m, 1H).

**<sup>13</sup>C NMR** (101 MHz, DMSO) δ 160.6 (t, *J*<sub>C-F</sub> = 30.3 Hz), 160.5, 156.5, 153.2, 137.5, 135.2, 132.2, 129.3, 129.1, 128.9, 128.0, 127.8, 127.6, 127.0, 126.2, 125.2, 123.2, 120.2, 120.2, 117.1 (t, *J*<sub>C-F</sub> = 256.5 Hz), 116.7, 50.7 (d, *J*<sub>C-F</sub> = 6.0 Hz), 47.6 (d, *J*<sub>C-F</sub> = 6.0 Hz), 33.6 (t, *J*<sub>C-F</sub> = 21.2 Hz).

**<sup>19</sup>F NMR** (376 MHz, DMSO-*d*<sub>6</sub>) δ -108.3 (d, *J* = 261.8 Hz, 1F), -112.8 (d, *J* = 261.8 Hz, 1F).

**HRMS-ESI (m/z):** calcd for C<sub>26</sub>H<sub>20</sub>F<sub>2</sub>NO<sub>5</sub>S<sup>+</sup> [M+H]<sup>+</sup> 496.1025, found 496.1020.

**3,3-difluoro-1-(4-fluorophenyl)-4-(((2-oxo-4-phenyl-2H-chromen-3-yl)sulfonyl)methyl)pyrrolidin-2-one (4ab).**

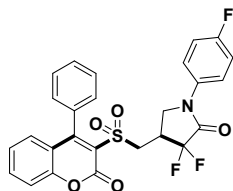

The product was purified by silica gel column chromatography with petroleum ether/ethyl acetate (8:1). White solid; m.p.: 224.2-226.8 °C; 60% yield;

**<sup>1</sup>H NMR** (400 MHz, DMSO-*d*<sub>6</sub>) δ 7.8 (ddd, *J* = 8.6, 7.3, 1.6 Hz, 1H), 7.7 – 7.6 (m, 3H), 7.6 – 7.4 (m, 3H), 7.4 – 7.3 (m, 5H), 6.9 (dd, *J* = 8.1, 1.5 Hz, 1H), 4.2 (dd, *J* = 14.6, 4.2 Hz, 1H), 4.0 – 3.8 (m, 3H), 3.7 – 3.5 (m, 1H).

**<sup>13</sup>C NMR** (101 MHz, DMSO) δ 160.9, 160.5 (t, *J*<sub>C-F</sub> = 29.3 Hz), 160.5, 158.5, 156.4, 153.2, 133.9 (d, *J*<sub>C-F</sub> = 3.0 Hz), 133.7 (d, *J*<sub>C-F</sub> = 311.1 Hz), 129.3, 128.8, 127.9, 127.8, 127.6, 127.0, 125.2, 123.2, 122.7 (d, *J*<sub>C-F</sub> = 8.1 Hz), 120.1, 117.0 (t, *J*<sub>C-F</sub> = 246.4 Hz), 116.6, 115.8 (d, *J*<sub>C-F</sub> = 23.2 Hz), 50.7 (d, *J*<sub>C-F</sub> = 7.0 Hz), 47.9 (d, *J*<sub>C-F</sub> = 6.0 Hz), 33.6 (t, *J*<sub>C-F</sub> = 21.2 Hz).

**<sup>19</sup>F NMR** (376 MHz, DMSO-*d*<sub>6</sub>) δ -108.3 (d, *J* = 261.9 Hz, 1F), -112.7 (d, *J* = 262.1 Hz, 1F), -115.4 (s, 1F).

**HRMS-ESI (m/z):** calcd for C<sub>26</sub>H<sub>19</sub>F<sub>3</sub>NO<sub>5</sub>S<sup>+</sup> [M+H]<sup>+</sup> 514.0931, found 514.0928.

**1-(4-chlorophenyl)-3,3-difluoro-4-(((2-oxo-4-phenyl-2H-chromen-3-yl)sulfonyl)methyl)pyrrolidin-2-one (4ac).**

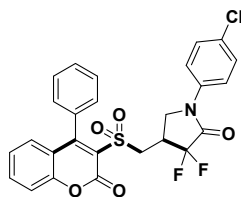

The product was purified by silica gel column chromatography with petroleum ether/ethyl acetate (8:1). White solid; m.p.: 261.7-263.8 °C; 71% yield;

**<sup>1</sup>H NMR** (400 MHz, DMSO-*d*<sub>6</sub>) δ 7.8 (ddd, *J* = 8.6, 7.3, 1.6 Hz, 1H), 7.7 – 7.6 (m, 3H), 7.6 – 7.4 (m, 5H), 7.4 – 7.3 (m, 3H), 6.9 (dd, *J* = 8.2, 1.5 Hz, 1H), 4.2 (dd, *J* = 14.6, 4.2 Hz, 1H), 4.0 – 3.7 (m, 3H), 3.7 – 3.5 (m, 1H).

**<sup>13</sup>C NMR** (101 MHz, DMSO) δ 160.6 (t, *J*<sub>C-F</sub> = 30.3 Hz), 160.5, 156.4, 153.2, 136.4, 135.2, 132.1, 130.0, 129.3, 129.0, 128.8, 127.9, 127.8, 127.6, 127.0, 125.2, 123.2, 121.8, 120.1, 117.1 (t, *J*<sub>C-F</sub> = 255.4 Hz), 116.6, 50.6 (d, *J*<sub>C-F</sub> = 7.0 Hz), 47.5 (d, *J*<sub>C-F</sub> = 6.0 Hz), 33.4 (t, *J*<sub>C-F</sub> = 21.2 Hz).

**<sup>19</sup>F NMR** (376 MHz, DMSO-*d*<sub>6</sub>) δ -108.3 (d, *J* = 262.3 Hz, 1F), -112.7 (d, *J* = 262.2 Hz, 1F).

**HRMS-ESI (m/z):** calcd for C<sub>26</sub>H<sub>19</sub>ClF<sub>2</sub>NO<sub>5</sub>S<sup>+</sup> [M+H]<sup>+</sup> 530.0635, found 530.0633.

**1-(4-bromophenyl)-3,3-difluoro-4-(((2-oxo-4-phenyl-2H-chromen-3-yl)sulfonyl)methyl)pyrrolidin-2-one (4ad).**

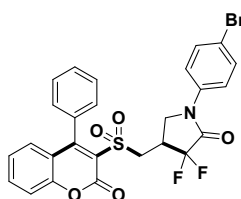

The product was purified by silica gel column chromatography with petroleum ether/ethyl acetate (8:1). White solid; m.p.: 245.3-248.0 °C; 78% yield;

**<sup>1</sup>H NMR** (400 MHz, DMSO-*d*<sub>6</sub>) δ 7.8 (t, *J* = 7.0 Hz, 1H), 7.7 (d, *J* = 8.9 Hz, 2H), 7.6 (t, *J* = 7.9 Hz, 3H), 7.6 – 7.5 (m, 3H), 7.4 – 7.3 (m, 3H), 6.9 (dd, *J* = 8.1, 1.6 Hz, 1H), 4.2 (dd, *J* = 14.5, 4.1 Hz, 1H), 4.0 – 3.8 (m, 3H), 3.7 – 3.5 (m, 1H).

**<sup>13</sup>C NMR** (101 MHz, DMSO) δ 160.6 (t, *J*<sub>C-F</sub> = 31.3 Hz), 160.5, 156.4, 153.2, 136.8, 135.2, 132.1, 131.9, 129.3, 128.8, 127.9, 127.8, 127.6, 127.0, 125.2, 123.2, 122.0, 120.1, 118.3, 117.0 (t, *J*<sub>C-F</sub> = 250.4 Hz), 116.6, 50.6 (d, *J*<sub>C-F</sub> = 7.0 Hz), 47.4 (d, *J*<sub>C-F</sub> = 5.0 Hz), 33.4 (t, *J*<sub>C-F</sub> = 20.2 Hz).

**<sup>19</sup>F NMR** (376 MHz, DMSO-*d*<sub>6</sub>) δ -108.3 (d, *J* = 262.4 Hz, 1F), -112.7 (d, *J* = 262.3 Hz, 1F).

**HRMS-ESI (m/z):** calcd for C<sub>26</sub>H<sub>19</sub>BrF<sub>2</sub>NO<sub>5</sub>S<sup>+</sup> [M+H]<sup>+</sup> 574.0130, found 574.0126.

**3,3-difluoro-4-(((2-oxo-4-phenyl-2H-chromen-3-yl)sulfonyl)methyl)-1-(p-tolyl)pyrrolidin-2-one (4ae).**

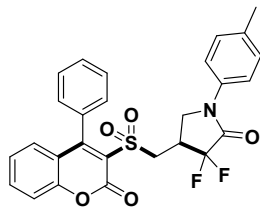

The product was purified by silica gel column chromatography with petroleum ether/ethyl acetate (8:1). White solid; m.p.: 205.1-206.7 °C; 68% yield;

**<sup>1</sup>H NMR** (400 MHz, DMSO-*d*<sub>6</sub>) δ 7.8 (t, *J* = 7.9 Hz, 1H), 7.6 (d, *J* = 8.3 Hz, 1H), 7.5 (dd, *J* = 11.8, 6.4 Hz, 5H), 7.4 (d, *J* = 6.9 Hz, 3H), 7.3 (d, *J* = 8.1 Hz, 2H), 6.9 (d, *J* = 8.1 Hz, 1H), 4.2 (dd, *J* = 14.5, 3.9 Hz, 1H), 4.0 – 3.7 (m, 3H), 3.6 – 3.5 (m, 1H), 2.3 (s, 3H).

**<sup>13</sup>C NMR** (101 MHz, DMSO) δ 160.6, 160.4 (t, *J*<sub>C-F</sub> = 31.3 Hz), 156.5, 153.2, 135.5, 135.3, 135.1, 132.2, 129.5, 129.3, 128.9, 128.0, 127.8, 127.7, 127.0, 125.3, 123.1, 120.2, 120.1, 117.2 (t, *J*<sub>C-F</sub> = 256.4 Hz), 116.7, 50.6 (d, *J*<sub>C-F</sub> = 7.0 Hz), 47.6 (d, *J*<sub>C-F</sub> = 6.0 Hz), 33.5 (t, *J*<sub>C-F</sub> = 21.2 Hz), 20.5.

**<sup>19</sup>F NMR** (376 MHz, DMSO-*d*<sub>6</sub>) δ -108.3 (d, *J* = 261.6 Hz, 1F), -112.7 (d, *J* = 261.6 Hz, 1F).

**HRMS-ESI (m/z)**: calcd for C<sub>27</sub>H<sub>22</sub>F<sub>2</sub>NO<sub>5</sub>S<sup>+</sup> [M+H]<sup>+</sup> 510.1181, found 510.1178.

**1-(4-(tert-butyl)phenyl)-3,3-difluoro-4-(((2-oxo-4-phenyl-2H-chromen-3-yl)sulfonyl)methyl)pyrrolidin-2-one (4af).**

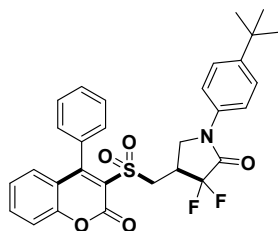

The product was purified by silica gel column chromatography with petroleum ether/ethyl acetate (8:1). White solid; m.p.: 230.3-232.3 °C; 66% yield;

**<sup>1</sup>H NMR** (400 MHz, DMSO-*d*<sub>6</sub>) δ 7.8 (ddd, *J* = 8.7, 7.3, 1.6 Hz, 1H), 7.6 (dd, *J* = 8.4, 1.1 Hz, 1H), 7.6 – 7.5 (m, 7H), 7.4 – 7.3 (m, 3H), 6.9 (dd, *J* = 8.2, 1.5 Hz, 1H), 4.2 (dd, *J* = 14.5, 4.2 Hz, 1H), 3.9 (t, *J* = 9.3 Hz, 1H), 3.9 – 3.8 (m, 2H), 3.7 – 3.5 (m, 1H), 1.3 (s, 9H).

**<sup>13</sup>C NMR** (101 MHz, DMSO) δ 160.5, 160.4 (t, *J*<sub>C-F</sub> = 30.3 Hz), 156.4, 153.2, 148.7, 135.2, 135.0, 132.1, 129.3, 128.8, 127.9, 127.8, 127.6, 127.0, 125.7, 125.2, 123.2, 120.1, 120.0, 117.1 (t, *J*<sub>C-F</sub> = 249.4 Hz), 116.6, 50.7 (d, *J*<sub>C-F</sub> = 7.0 Hz), 47.6 (d, *J*<sub>C-F</sub> = 6.0 Hz), 34.2, 33.3 (t, *J*<sub>C-F</sub> = 20.2 Hz), 31.0.

**<sup>19</sup>F NMR** (376 MHz, DMSO-*d*<sub>6</sub>) δ -108.2 (d, *J* = 261.8 Hz, 1F), -112.7 (d, *J* = 262.1 Hz, 1F).

**HRMS-ESI (m/z)**: calcd for C<sub>30</sub>H<sub>28</sub>F<sub>2</sub>NO<sub>5</sub>S<sup>+</sup> [M+H]<sup>+</sup> 552.1651, found 552.1647.

**1-(4-(benzyloxy)phenyl)-3,3-difluoro-4-(((2-oxo-4-phenyl-2H-chromen-3-yl)sulfonyl)methyl)pyrrolidin-2-one (4ag).**

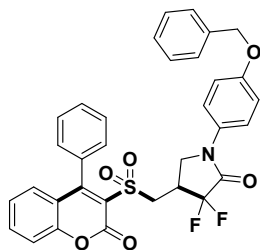

The product was purified by silica gel column chromatography with petroleum ether/ethyl acetate (10:1). White solid; m.p.: 200.1-202.0 °C; 61% yield;

**<sup>1</sup>H NMR** (400 MHz, DMSO-*d*<sub>6</sub>) δ 7.8 (t, *J* = 7.8 Hz, 1H), 7.6 (d, *J* = 8.4 Hz, 1H), 7.5 (d, *J* = 7.5 Hz, 4H), 7.5 (d, *J* = 7.2 Hz, 3H), 7.4 – 7.3 (m, 6H), 7.1 (d, *J* = 8.5 Hz, 2H), 6.9 (d, *J* = 8.3 Hz, 1H), 5.1 (s, 2H), 4.2 – 4.0 (m, 1H), 3.9 – 3.7 (m, 2H), 3.6 – 3.4 (m, 1H).

**<sup>13</sup>C NMR** (101 MHz, DMSO) δ 160.6, 160.5 (t, *J*<sub>C-F</sub> = 30.3 Hz), 156.5, 156.3, 153.2, 136.8, 135.3, 132.2, 130.7, 129.4, 128.9, 128.4, 128.0, 127.9, 127.8, 127.7, 127.7, 127.0, 125.2, 123.2, 122.1, 120.2, 117.3 (t, *J*<sub>C-F</sub> = 251.4 Hz), 116.7, 115.2, 69.4, 50.7, 47.9, 33.6 (t, *J*<sub>C-F</sub> = 21.2 Hz).

**<sup>19</sup>F NMR** (376 MHz, DMSO-*d*<sub>6</sub>) δ -108.2 (d, *J* = 261.6 Hz, 1F), -112.6 (d, *J* = 261.7 Hz, 1F).

**HRMS-ESI (m/z)**: calcd for C<sub>33</sub>H<sub>26</sub>F<sub>2</sub>NO<sub>6</sub>S<sup>+</sup> [M+H]<sup>+</sup> 602.1443, found 602.1440.

**1-(3-bromophenyl)-3,3-difluoro-4-(((2-oxo-4-phenyl-2H-chromen-3-yl)sulfonyl)methyl)pyrrolidin-2-one (4ah).**

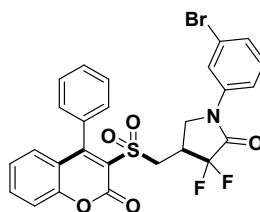

The product was purified by silica gel column chromatography with petroleum ether/ethyl acetate (8:1). White solid; m.p.: 265.7-268.2 °C; 55% yield;

**<sup>1</sup>H NMR** (400 MHz, DMSO-*d*<sub>6</sub>) δ 7.9 (s, 1H), 7.8 (t, *J* = 7.9 Hz, 1H), 7.6 (t, *J* = 8.2 Hz, 2H), 7.5 – 7.4 (m, 5H), 7.4 (d, *J* = 6.8 Hz, 3H), 6.9 (d, *J* = 8.1 Hz, 1H), 4.2 (dd, *J* = 14.6, 4.2 Hz, 1H), 3.9 (ddd, *J* = 33.2, 14.4, 9.3 Hz, 3H), 3.7 – 3.5 (m, 1H).

**<sup>13</sup>C NMR** (101 MHz, DMSO) δ 160.9 (t, *J*<sub>C-F</sub> = 29.3 Hz), 160.6, 156.5, 153.2, 139.0, 135.3, 132.2, 131.1, 129.4, 128.9, 128.9, 128.0, 127.9, 127.7, 127.1, 125.3, 123.2, 122.8, 121.8, 120.2, 119.1, 117.0 (t, *J*<sub>C-F</sub> = 258.4 Hz), 116.7, 50.6 (d, *J*<sub>C-F</sub> = 7.0 Hz), 47.5 (d, *J*<sub>C-F</sub> = 6.0 Hz), 33.5 (t, *J*<sub>C-F</sub> = 20.2 Hz).

**<sup>19</sup>F NMR** (376 MHz, DMSO-*d*<sub>6</sub>) δ -108.4 (d, *J* = 262.3 Hz, 1F), -112.8 (d, *J* = 262.3 Hz, 1F).

**HRMS-ESI (m/z)**: calcd for C<sub>26</sub>H<sub>19</sub>BrF<sub>2</sub>NO<sub>5</sub>S<sup>+</sup> [M+H]<sup>+</sup> 574.0130, found 574.0126.

**3,3-difluoro-4-(((2-oxo-4-phenyl-2H-chromen-3-yl)sulfonyl)methyl)-1-(*m*-tolyl)pyrrolidin-2-one (4ai).**



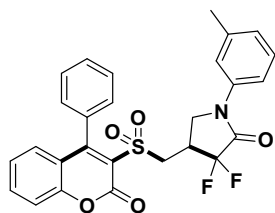

The product was purified by silica gel column chromatography with petroleum ether/ethyl acetate (6:1). White solid; m.p.: 210.1-212.8 °C; 68% yield;

**<sup>1</sup>H NMR** (400 MHz, DMSO-*d*<sub>6</sub>) δ 7.8 (t, *J* = 7.9 Hz, 1H), 7.6 (d, *J* = 8.3 Hz, 1H), 7.5 (t, *J* = 4.2 Hz, 2H), 7.5 – 7.3 (m, 7H), 7.1 (d, *J* = 7.5 Hz, 1H), 6.9 (d, *J* = 8.1 Hz, 1H), 4.2 (dd, *J* = 14.6, 4.1 Hz, 1H), 4.0 – 3.7 (m, 3H), 3.7 – 3.5 (m, 1H), 2.3 (s, 3H).

**<sup>13</sup>C NMR** (101 MHz, DMSO) δ 160.6, 160.6 (t, *J*<sub>C-F</sub> = 30.3 Hz), 156.5, 153.2, 138.6, 137.5, 135.3, 132.2, 129.4, 129.0, 128.9, 128.1, 127.8, 127.7, 127.0, 126.9, 125.3, 123.2, 120.7, 120.2, 117.5 (t, *J*<sub>C-F</sub> = 256.4 Hz), 117.2, 116.7, 50.6 (d, *J*<sub>C-F</sub> = 6.0 Hz), 47.7 (d, *J*<sub>C-F</sub> = 6.0 Hz), 33.6 (t, *J*<sub>C-F</sub> = 21.2 Hz), 21.1.

**<sup>19</sup>F NMR** (376 MHz, DMSO-*d*<sub>6</sub>) δ -108.4 (d, *J* = 261.6 Hz, 1F), -112.9 (d, *J* = 261.7 Hz, 1F).

**HRMS-ESI (m/z)**: calcd for C<sub>27</sub>H<sub>22</sub>F<sub>2</sub>NO<sub>5</sub>S<sup>+</sup> [M+H]<sup>+</sup> 510.1181, found 510.1178.

**3,3-difluoro-1-(3-methoxyphenyl)-4-(((2-oxo-4-phenyl-2H-chromen-3-yl)sulfonyl)methyl)pyrrolidin-2-one (4aj).**

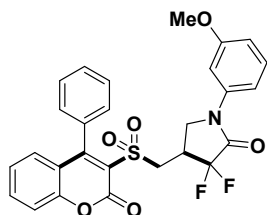

The product was purified by silica gel column chromatography with petroleum ether/ethyl acetate (8:1). White solid; m.p.: 254.1-255.2 °C; 86% yield;

**<sup>1</sup>H NMR** (400 MHz, DMSO-*d*<sub>6</sub>) δ 7.8 (t, *J* = 7.9 Hz, 1H), 7.6 (d, *J* = 8.3 Hz, 1H), 7.5 – 7.4 (m, 3H), 7.3 (d, *J* = 7.7 Hz, 4H), 7.2 (s, 1H), 7.1 (d, *J* = 8.2 Hz, 1H), 6.9 (dd, *J* = 14.9, 8.3 Hz, 2H), 4.2 (dd, *J* = 14.8, 4.2 Hz, 1H), 3.9 – 3.8 (m, 3H), 3.7 (s, 3H), 3.6 – 3.4 (m, 1H).

**<sup>13</sup>C NMR** (101 MHz, DMSO) δ 160.7 (t, *J*<sub>C-F</sub> = 31.3 Hz), 160.6, 159.6, 156.5, 153.2, 138.7, 135.3, 132.2, 130.0, 129.4, 128.9, 128.0, 127.8, 127.7, 127.1, 125.3, 123.2, 120.2, 117.1 (t, *J*<sub>C-F</sub> = 256.4 Hz), 116.7, 112.3, 111.6, 106.4, 55.3, 50.6 (d, *J*<sub>C-F</sub> = 7.0 Hz), 47.7 (d, *J*<sub>C-F</sub> = 6.0 Hz), 33.5 (t, *J*<sub>C-F</sub> = 20.2 Hz).

**<sup>19</sup>F NMR** (376 MHz, DMSO-*d*<sub>6</sub>) δ -108.3 (d, *J* = 261.8 Hz, 1F), -112.8 (d, *J* = 261.7 Hz, 1F).

**HRMS-ESI (m/z)**: calcd for C<sub>27</sub>H<sub>22</sub>F<sub>2</sub>NO<sub>6</sub>S<sup>+</sup> [M+H]<sup>+</sup> 526.1130, found 526.1125.

**3,3-difluoro-4-(((2-oxo-4-phenyl-2H-chromen-3-yl)sulfonyl)methyl)-1-(3-(trifluoromethyl)phenyl)pyrrolidin-2-one (4ak).**

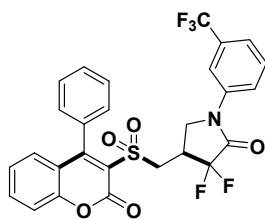

The product was purified by silica gel column chromatography with petroleum ether/ethyl acetate (8:1). White solid; m.p.: 232.8-236.7 °C; 62% yield;

**<sup>1</sup>H NMR** (400 MHz, DMSO-*d*<sub>6</sub>) δ 8.0 (s, 1H), 7.9 – 7.8 (m, 2H), 7.7 (t, *J* = 8.0 Hz, 1H), 7.7 (d, *J* = 7.8 Hz, 1H), 7.6 (dd, *J* = 8.4, 1.1 Hz, 1H), 7.6 – 7.5 (m, 2H), 7.5 – 7.4 (m, 1H), 7.4 – 7.3 (m, 3H), 6.9 (dd, *J* = 8.1, 1.5 Hz, 1H), 4.2 (dd, *J* = 14.6, 4.3 Hz, 1H), 4.0 – 3.9 (m, 2H), 3.8 (dd, *J* = 14.6, 9.4 Hz, 1H), 3.7 – 3.5 (m, 1H).

**<sup>13</sup>C NMR** (101 MHz, DMSO) δ 161.1 (t, *J*<sub>C-F</sub> = 30.3 Hz), 160.6, 156.5, 153.2, 138.2, 135.3, 132.2, 130.5, 129.5 (q, *J*<sub>C-F</sub> = 32.3 Hz), 129.4, 128.9, 128.0, 127.8, 127.6, 127.1, 125.3, 125.2, 124.0, 123.2, 122.6 (q, *J*<sub>C-F</sub> = 4.0 Hz), 122.4, 120.2, 117.0 (t, *J*<sub>C-F</sub> = 246.4 Hz), 116.7 (q, *J*<sub>C-F</sub> = 4.0 Hz), 50.6 (d, *J*<sub>C-F</sub> = 7.0 Hz), 47.6 (d, *J*<sub>C-F</sub> = 6.0 Hz), 33.6 (t, *J*<sub>C-F</sub> = 20.2 Hz).

**<sup>19</sup>F NMR** (376 MHz, DMSO-*d*<sub>6</sub>) δ -61.3 (s, 3F), -108.4 (d, *J* = 262.3 Hz, 1F), -112.8 (d, *J* = 262.6 Hz, 1F).

**HRMS-ESI (m/z)**: calcd for C<sub>27</sub>H<sub>19</sub>F<sub>5</sub>NO<sub>5</sub>S<sup>+</sup> [M+H]<sup>+</sup> 564.0899, found 564.0893.

**1-(3,5-dimethylphenyl)-3,3-difluoro-4-(((2-oxo-4-phenyl-2H-chromen-3-yl)sulfonyl)methyl)pyrrolidin-2-one (4al).**

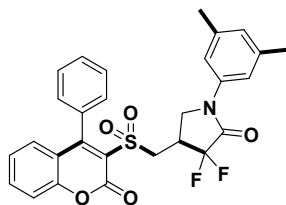

The product was purified by silica gel column chromatography with petroleum ether/ethyl acetate (8:1). White solid; m.p.: 198.9-201.6 °C; 87% yield;

**<sup>1</sup>H NMR** (400 MHz, DMSO-*d*<sub>6</sub>) δ 7.8 (t, *J* = 7.8 Hz, 1H), 7.6 (d, *J* = 8.2 Hz, 1H), 7.5 (t, *J* = 4.2 Hz, 2H), 7.5 (d, *J* = 6.3 Hz, 1H), 7.4 (dd, *J* = 7.5, 4.4 Hz, 3H), 7.2 (s, 2H), 7.0 – 6.9 (m, 2H), 4.2 (dd, *J* = 14.6, 4.2 Hz, 1H), 3.9 (t, *J* = 9.4 Hz, 1H), 3.8 – 3.7 (m, 3H), 2.3 (s, 6H).

**<sup>13</sup>C NMR** (101 MHz, DMSO) δ 161.1, 160.8 (t, *J*<sub>C-F</sub> = 30.3 Hz), 156.9, 153.5, 138.7, 137.7, 135.7, 132.4, 129.7, 129.3, 128.3, 128.2, 128.1, 128.0, 127.3, 125.6, 123.3, 120.4, 118.3, 117.5 (t, *J*<sub>C-F</sub> = 251.4 Hz), 117.0, 50.9 (d, *J*<sub>C-F</sub> = 7.0 Hz), 48.0 (d, *J*<sub>C-F</sub> = 6.0 Hz), 33.7 (t, *J*<sub>C-F</sub> = 20.2 Hz), 21.3.

**<sup>19</sup>F NMR** (376 MHz, DMSO-*d*<sub>6</sub>) δ -108.3 (d, *J* = 261.6 Hz, 1F), -112.9 (d, *J* = 261.6 Hz, 1F).

**HRMS-ESI (m/z)**: calcd for C<sub>28</sub>H<sub>24</sub>F<sub>2</sub>NO<sub>5</sub>S<sup>+</sup> [M+H]<sup>+</sup> 524.1338, found 524.1334.

**1-(4-chloro-3-methoxyphenyl)-3,3-difluoro-4-(((2-oxo-4-phenyl-2H-chromen-3-yl)sulfonyl)methyl)pyrrolidin-2-one (4am).**

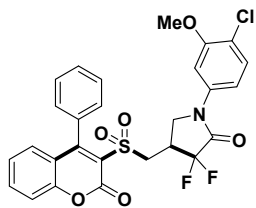

The product was purified by silica gel column chromatography with petroleum ether/ethyl acetate (8:1). White solid; m.p.: 281.2-283.0 °C; 64% yield;

**<sup>1</sup>H NMR** (400 MHz, CDCl<sub>3</sub>) δ 7.6 (ddd, *J* = 8.6, 7.2, 1.6 Hz, 1H), 7.5 (d, *J* = 2.5 Hz, 1H), 7.5 – 7.4 (m, 3H), 7.4 (d, *J* = 8.4 Hz, 1H), 7.3 (dd, *J* = 8.1, 4.3 Hz, 2H), 7.2 – 7.2 (m, 2H), 7.0 (dd, *J* = 8.2, 1.6 Hz, 1H), 6.8 (dd, *J* = 8.6, 2.5 Hz, 1H), 4.0 (t, *J* = 3.3 Hz, 1H), 4.0 (dd, *J* = 14.0, 3.3 Hz, 1H), 3.8 (s, 3H), 3.8 – 3.7 (m, 2H), 3.3 – 3.1 (m, 1H).

**<sup>13</sup>C NMR** (101 MHz, CDCl<sub>3</sub>) δ 161.4, 160.8 (t, *J*<sub>C-F</sub> = 30.3 Hz), 156.7, 155.2, 153.7, 137.1, 135.6, 131.4, 130.1, 130.1, 129.7, 128.3, 128.1, 128.0, 127.0, 125.4, 123.7, 120.1, 119.7, 117.1, 116.4 (t, *J*<sub>C-F</sub> = 251.4 Hz), 111.8, 104.7, 56.3, 51.8 (d, *J*<sub>C-F</sub> = 7.0 Hz), 48.0 (d, *J*<sub>C-F</sub> = 6.0 Hz), 34.5 (t, *J*<sub>C-F</sub> = 21.2 Hz).

**<sup>19</sup>F NMR** (376 MHz, CDCl<sub>3</sub>) δ -109.9 (d, *J* = 266.4 Hz, 1F), -114.5 (d, *J* = 266.4 Hz, 1F).

**HRMS-ESI (m/z)**: calcd for C<sub>27</sub>H<sub>21</sub>ClF<sub>2</sub>NO<sub>6</sub>S<sup>+</sup> [M+H]<sup>+</sup> 560.0741, found 560.0738.

**3,3-difluoro-1-(naphthalen-2-yl)-4-(((2-oxo-4-phenyl-2H-chromen-3-yl)sulfonyl)methyl)pyrrolidin-2-one (4an).**

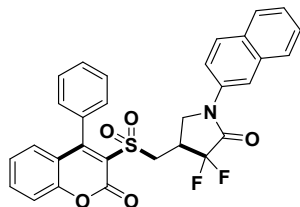

The product was purified by silica gel column chromatography with petroleum ether/ethyl acetate (8:1). White solid; m.p.: 259.6-261.4 °C; 47% yield;

**<sup>1</sup>H NMR** (400 MHz, DMSO-*d*<sub>6</sub>) δ 8.0 (d, *J* = 7.2 Hz, 2H), 8.0 (t, *J* = 8.4 Hz, 2H), 7.9 (d, *J* = 9.2 Hz, 1H), 7.8 (t, *J* = 7.9 Hz, 1H), 7.6 (d, *J* = 8.4 Hz, 1H), 7.5 (dd, *J* = 15.4, 7.2 Hz, 4H), 7.5 (d, *J* = 4.1 Hz, 1H), 7.4 (t, *J* = 6.7 Hz, 2H), 6.9 (d, *J* = 8.1 Hz, 2H), 4.2 (dd, *J* = 14.5, 4.0 Hz, 1H), 4.1 (t, *J* = 9.4 Hz, 1H), 4.0 (t, *J* = 9.0 Hz, 1H), 3.9 (dd, *J* = 14.5, 9.6 Hz, 1H), 3.7 – 3.6 (m, 1H).

**<sup>13</sup>C NMR** (101 MHz, DMSO) δ 161.1, 160.6, 156.5, 153.2, 135.3, 135.3, 132.8, 132.2, 130.9, 129.4, 128.9, 128.9, 128.0, 127.9, 127.8, 127.7, 127.6, 127.1, 127.0, 126.2, 125.3, 123.2, 120.2, 119.4, 117.8, 117.3 (t, *J*<sub>C-F</sub> = 258.4 Hz), 116.7, 50.6, 47.9, 33.4 (t, *J*<sub>C-F</sub> = 20.2 Hz).

**<sup>19</sup>F NMR** (376 MHz, DMSO-*d*<sub>6</sub>) δ -108.2 (d, *J* = 261.8 Hz, 1F), -112.6 (d, *J* = 261.8 Hz, 1F).

**HRMS-ESI (m/z)**: calcd for C<sub>30</sub>H<sub>22</sub>F<sub>2</sub>NO<sub>5</sub>S<sup>+</sup> [M+H]<sup>+</sup> 546.1181, found 546.1177.

**1-cyclopentyl-3,3-difluoro-4-(((2-oxo-4-phenyl-2H-chromen-3-yl)sulfonyl)methyl)pyrrolidin-2-one (4ao).**

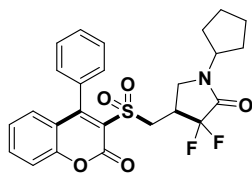

The product was purified by silica gel column chromatography with petroleum ether/ethyl acetate (8:1). White solid; m.p.: 192.1-193.4 °C; 51% yield;

<sup>1</sup>H NMR (400 MHz, DMSO-*d*<sub>6</sub>) δ 7.8 (t, *J* = 7.8 Hz, 1H), 7.6 (d, *J* = 8.3 Hz, 1H), 7.5 (d, *J* = 4.6 Hz, 3H), 7.4 (t, *J* = 6.7 Hz, 3H), 6.9 (d, *J* = 8.1 Hz, 1H), 4.3 (t, *J* = 7.5 Hz, 1H), 4.1 (d, *J* = 14.4 Hz, 1H), 3.7 (dd, *J* = 14.6, 9.2 Hz, 1H), 3.4 (d, *J* = 7.7 Hz, 2H), 3.3 (d, *J* = 6.9 Hz, 1H), 1.9 – 1.7 (m, 2H), 1.7 – 1.4 (m, 6H).

<sup>13</sup>C NMR (101 MHz, DMSO) δ 161.1 (t, *J*<sub>C-F</sub> = 30.3 Hz), 160.7, 156.5, 153.2, 135.2, 132.3, 129.4, 128.8, 128.1, 127.8, 127.5, 126.8, 125.2, 122.9, 120.3, 117.7 (t, *J*<sub>C-F</sub> = 255.4 Hz), 116.7, 52.7, 50.5, (d, *J*<sub>C-F</sub> = 7.0 Hz), 42.7 (d, *J*<sub>C-F</sub> = 7.0 Hz), 34.0 (t, *J*<sub>C-F</sub> = 21.2 Hz), 28.4, 28.3, 24.2, 24.1.

<sup>19</sup>F NMR (376 MHz, DMSO-*d*<sub>6</sub>) δ -110.1 (d, *J* = 260.7 Hz, 1F), -113.5 (d, *J* = 260.3 Hz, 1F).

HRMS-ESI (*m/z*): calcd for C<sub>25</sub>H<sub>24</sub>F<sub>2</sub>NO<sub>5</sub>S<sup>+</sup> [M+H]<sup>+</sup> 488.1338, found 488.1335.

**3,3-difluoro-4-(((7-fluoro-2-oxo-4-phenyl-2H-chromen-3-yl)sulfonyl)methyl)-1-phenylpyrrolidin-2-one (4ba).**

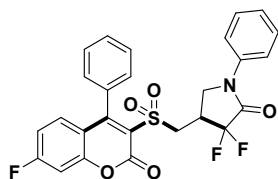

The product was purified by silica gel column chromatography with petroleum ether/ethyl acetate (5:1). White solid; m.p.: 293.7-297.0 °C; 52% yield;

<sup>1</sup>H NMR (400 MHz, DMSO-*d*<sub>6</sub>) δ 7.7 (d, *J* = 8.0 Hz, 1H), 7.6 (s, 1H), 7.5 (t, *J* = 7.6 Hz, 1H), 7.3 – 7.3 (m, 1H), 7.2 (t, *J* = 8.8 Hz, 1H), 7.0 – 6.9 (m, 1H), 4.1 (t, *J* = 8.9 Hz, 1H), 3.9 (t, *J* = 8.4 Hz, 1H), 3.7 (dd, *J* = 14.8, 9.4 Hz, 1H), 3.5 (d, *J* = 14.2 Hz, 1H).

<sup>13</sup>C NMR (101 MHz, DMSO) δ 162.3, 161.5, 151.6, 146.1 (d, *J*<sub>C-F</sub> = 2.0 Hz), 139.9, 138.0, 130.8, 129.9, 129.7, 129.7, 129.6, 129.2, 126.6, 123.6, 123.5, 120.7, 117.4 (t, *J*<sub>C-F</sub> = 255.5 Hz), 116.9, 116.6, 47.9, 47.6, 33.9 (t, *J*<sub>C-F</sub> = 21.2 Hz).

<sup>19</sup>F NMR (376 MHz, DMSO-*d*<sub>6</sub>) δ -107.8 (d, *J* = 263.0 Hz, 1F), -112.3 (d, *J* = 262.6 Hz, 1F), -116.4 (s, 1F).

HRMS-ESI (*m/z*): calcd for C<sub>26</sub>H<sub>19</sub>F<sub>3</sub>NO<sub>5</sub>S<sup>+</sup> [M+H]<sup>+</sup> 514.0931, found 514.0928.

**4-(((7-chloro-2-oxo-4-phenyl-2H-chromen-3-yl)sulfonyl)methyl)-3,3-difluoro-1-phenylpyrrolidin-2-one (4ca).**

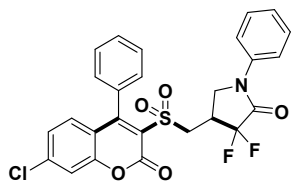

The product was purified by silica gel column chromatography with petroleum ether/ethyl acetate (8:1). White solid; m.p.: 259.1-261.3 °C; 65% yield;

<sup>1</sup>H NMR (400 MHz, DMSO-*d*<sub>6</sub>) δ 7.9 (s, 1H), 7.6 (d, *J* = 8.1 Hz, 2H), 7.6 – 7.4 (m, 6H), 7.4 (s, 2H), 7.3 (t, *J* = 7.5 Hz, 1H), 6.9 (d, *J* = 8.7 Hz, 1H), 4.2 (dd, *J* = 14.5, 4.1 Hz, 1H), 3.9 (ddd, *J* = 23.0, 14.9, 9.6 Hz, 3H), 3.7 – 3.4 (m, 1H).

<sup>13</sup>C NMR (101 MHz, DMSO) δ 160.6 (t, *J*<sub>C-F</sub> = 31.3 Hz), 159.9, 156.2, 153.5, 139.6, 137.5, 131.9, 130.7, 129.1, 129.0, 128.0, 127.9, 127.8, 127.0, 126.2, 125.6, 123.3, 120.2, 119.4, 117.1 (t, *J*<sub>C-F</sub> = 256.5 Hz), 116.8, 50.7 (d, *J*<sub>C-F</sub> = 6.0 Hz), 47.6 (d, *J*<sub>C-F</sub> = 6.0 Hz), 33.5 (t, *J*<sub>C-F</sub> = 20.2 Hz).

<sup>19</sup>F NMR (376 MHz, DMSO-*d*<sub>6</sub>) δ -108.2 (d, *J* = 262.0 Hz, 1F), -112.8 (d, *J* = 261.8 Hz, 1F).

HRMS-ESI (m/z): calcd for C<sub>26</sub>H<sub>19</sub>ClF<sub>2</sub>NO<sub>5</sub>S<sup>+</sup> [M+H]<sup>+</sup> 530.0635, found 530.0633.

**3,3-difluoro-4-(((2-oxo-4-phenyl-7-(trifluoromethyl)-2H-chromen-3-yl)sulfonyl)methyl)-1-phenylpyrrolidin-2-one (4da).**

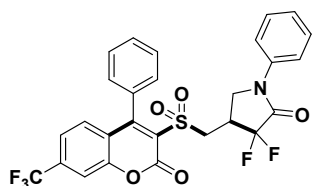

The product was purified by silica gel column chromatography with petroleum ether/ethyl acetate (8:1). White solid; m.p.: 203.7-206.4 °C; 69% yield;

<sup>1</sup>H NMR (400 MHz, DMSO-*d*<sub>6</sub>) δ 8.1 (s, 1H), 7.7 (d, *J* = 8.6 Hz, 1H), 7.6 (d, *J* = 8.1 Hz, 2H), 7.6 – 7.4 (m, 5H), 7.4 (d, *J* = 7.7 Hz, 2H), 7.3 (t, *J* = 7.5 Hz, 1H), 7.1 (d, *J* = 8.4 Hz, 1H), 4.2 (dd, *J* = 14.7, 4.1 Hz, 1H), 4.0 – 3.8 (m, 3H), 3.7 – 3.5 (m, 1H).

<sup>13</sup>C NMR (101 MHz, DMSO) δ 160.6 (t, *J*<sub>C-F</sub> = 29.3 Hz), 159.2, 156.1, 153.0, 137.5, 133.8 (q, *J*<sub>C-F</sub> = 33.3 Hz), 131.7, 130.7, 129.2, 129.1, 128.1, 128.0, 127.9, 127.1, 126.2, 125.4, 124.4, 123.6, 121.4, 120.2, 117.1 (t, *J*<sub>C-F</sub> = 241.5 Hz), 114.2, 50.7 (d, *J*<sub>C-F</sub> = 7.0 Hz), 47.5 (d, *J*<sub>C-F</sub> = 6.0 Hz), 33.5 (t, *J*<sub>C-F</sub> = 20.2 Hz).

<sup>19</sup>F NMR (376 MHz, DMSO-*d*<sub>6</sub>) δ -61.6 (s, 3F), -108.2 (d, *J* = 262.2 Hz, 1F), -112.8 (d, *J* = 261.9 Hz, 1F).

HRMS-ESI (m/z): calcd for C<sub>27</sub>H<sub>19</sub>F<sub>5</sub>NO<sub>5</sub>S<sup>+</sup> [M+H]<sup>+</sup> 564.0899, found 564.0893.

**3,3-difluoro-4-(((7-methyl-2-oxo-4-phenyl-2H-chromen-3-yl)sulfonyl)methyl)-1-phenylpyrrolidin-2-one (4ea).**

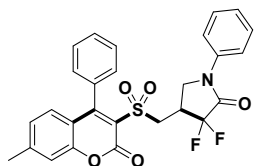

The product was purified by silica gel column chromatography with petroleum ether/ethyl acetate (8:1). White solid; m.p.: 261.4-261.7 °C; 87% yield;

**<sup>1</sup>H NMR** (400 MHz, DMSO-*d*<sub>6</sub>) δ 7.6 (d, *J* = 8.1 Hz, 2H), 7.5 – 7.4 (m, 6H), 7.3 (d, *J* = 6.7 Hz, 2H), 7.3 (t, *J* = 7.5 Hz, 1H), 7.2 (d, *J* = 8.4 Hz, 1H), 6.8 (d, *J* = 8.3 Hz, 1H), 4.2 (dd, *J* = 14.5, 3.9 Hz, 1H), 3.9 (ddd, *J* = 29.6, 21.5, 12.3 Hz, 3H), 3.7 – 3.4 (m, 1H), 2.4 (s, 3H).

**<sup>13</sup>C NMR** (101 MHz, DMSO) δ 160.6, 160.6 (t, *J*<sub>C-F</sub> = 31.3 Hz), 156.7, 153.3, 147.0, 137.6, 132.3, 129.1, 129.1, 128.8, 128.0, 127.8, 127.6, 127.0, 126.4, 126.2, 121.9, 120.2, 117.8, 117.2 (t, *J*<sub>C-F</sub> = 252.5 Hz), 116.6, 50.6 (d, *J*<sub>C-F</sub> = 7.0 Hz), 47.6 (d, *J*<sub>C-F</sub> = 6.0 Hz), 33.6 (t, *J*<sub>C-F</sub> = 20.2 Hz), 21.3.

**<sup>19</sup>F NMR** (376 MHz, DMSO-*d*<sub>6</sub>) δ -108.3 (d, *J* = 261.9 Hz, 1F), -112.8 (d, *J* = 261.8 Hz, 1F).

**HRMS-ESI (m/z):** calcd for C<sub>27</sub>H<sub>22</sub>F<sub>2</sub>NO<sub>5</sub>S<sup>+</sup> [M+H]<sup>+</sup> 510.1181, found 510.1178.

**3,3-difluoro-4-(((7-methoxy-2-oxo-4-phenyl-2H-chromen-3-yl)sulfonyl)methyl)-1-phenylpyrrolidin-2-one (4fa).**

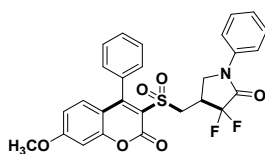

The product was purified by silica gel column chromatography with petroleum ether/ethyl acetate (8:1). White solid; m.p.: 248.3-251.8 °C; 80% yield;

**<sup>1</sup>H NMR** (400 MHz, DMSO-*d*<sub>6</sub>) δ 7.6 (d, *J* = 7.4 Hz, 1H), 7.5 (m, 5H), 7.4 – 7.3 (m, 2H), 7.3 (t, *J* = 7.4 Hz, 1H), 7.2 (d, *J* = 2.5 Hz, 1H), 7.0 (dd, *J* = 9.1, 2.5 Hz, 1H), 6.8 (d, *J* = 9.1 Hz, 1H), 4.2 (dd, *J* = 14.5, 4.2 Hz, 1H), 3.9 (s, 3H), 3.9 – 3.7 (m, 2H), 3.6 – 3.4 (m, 1H).

**<sup>13</sup>C NMR** (101 MHz, DMSO) δ 165.2, 160.8, 160.6 (t, *J*<sub>C-F</sub> = 30.3 Hz), 156.9, 155.6, 137.6, 132.6, 130.7, 129.1, 128.8, 127.9, 127.8, 127.6, 127.0, 126.1, 120.2, 119.4, 117.2 (t, *J*<sub>C-F</sub> = 249.5 Hz), 113.8, 113.5, 100.6, 56.5, 50.4 (d, *J*<sub>C-F</sub> = 7.0 Hz), 47.6 (d, *J*<sub>C-F</sub> = 6.0 Hz), 33.7 (t, *J*<sub>C-F</sub> = 21.2 Hz).

**<sup>19</sup>F NMR** (376 MHz, DMSO-*d*<sub>6</sub>) δ -108.4 (d, *J* = 261.8 Hz, 1F), -112.8 (d, *J* = 261.9 Hz, 1F).

**HRMS-ESI (m/z):** calcd for C<sub>27</sub>H<sub>22</sub>F<sub>2</sub>NO<sub>6</sub>S<sup>+</sup> [M+H]<sup>+</sup> 526.1130, found 526.1125.

**4-(((7-(tert-butyl)-2-oxo-4-phenyl-2H-chromen-3-yl)sulfonyl)methyl)-3,3-difluoro-1-phenylpyrrolidin-2-one (4ga).**

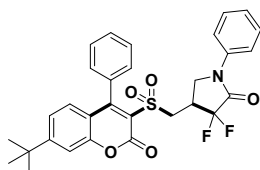

The product was purified by silica gel column chromatography with petroleum ether/ethyl acetate (8:1). White solid; m.p.: 263.8-265.3 °C; 88% yield;

**<sup>1</sup>H NMR** (400 MHz, DMSO-*d*<sub>6</sub>) δ 7.6 (d, *J* = 8.5 Hz, 3H), 7.5 – 7.4 (m, 6H), 7.4 (d, *J* = 7.6 Hz, 2H), 7.3 (t, *J* = 7.4 Hz, 1H), 6.8 (d, *J* = 8.5 Hz, 1H), 4.2 (dd, *J* = 14.6, 4.0 Hz, 1H), 3.8 (ddd, *J* = 34.4, 14.9, 9.3 Hz, 3H), 3.7 – 3.4 (m, 1H), 1.3 (s, 9H).

**<sup>13</sup>C NMR** (101 MHz, DMSO) δ 160.6, 160.6 (t, *J*<sub>C-F</sub> = 30.3 Hz), 159.6, 156.7, 153.3, 137.6, 132.4, 129.1, 129.0, 128.8, 128.0, 127.8, 127.6, 126.9, 126.1, 122.8, 122.0, 120.2, 117.8, 117.1 (t, *J*<sub>C-F</sub> = 253.5 Hz), 113.4, 50.5 (d, *J*<sub>C-F</sub> = 7.0 Hz), 47.6 (d, *J*<sub>C-F</sub> = 6.0 Hz), 35.3, 33.7 (t, *J*<sub>C-F</sub> = 21.2 Hz), 30.5.

**<sup>19</sup>F NMR** (376 MHz, DMSO-*d*<sub>6</sub>) δ -108.4 (d, *J* = 261.7 Hz, 1F), -112.9 (d, *J* = 261.8 Hz, 1F).

**HRMS-ESI (m/z):** calcd for C<sub>30</sub>H<sub>28</sub>F<sub>2</sub>NO<sub>5</sub>S<sup>+</sup> [M+H]<sup>+</sup> 552.1651, found 552.1647.

**3,3-difluoro-4-(((2-oxo-4,7-diphenyl-2*H*-chromen-3-yl)sulfonyl)methyl)-1-phenylpyrrolidin-2-one (4ha).**

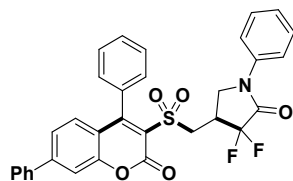

The product was purified by silica gel column chromatography with petroleum ether/ethyl acetate (8:1). White solid; m.p.: 305.2-306.7 °C; 51% yield;

**<sup>1</sup>H NMR** (400 MHz, DMSO-*d*<sub>6</sub>) δ 8.0 (s, 1H), 7.8 (d, *J* = 7.4 Hz, 2H), 7.7 (d, *J* = 8.6 Hz, 1H), 7.6 (d, *J* = 8.1 Hz, 2H), 7.6 – 7.4 (m, 8H), 7.4 (d, *J* = 6.8 Hz, 2H), 7.3 (t, *J* = 7.5 Hz, 1H), 7.0 (d, *J* = 8.4 Hz, 1H), 4.2 (dd, *J* = 14.6, 4.0 Hz, 1H), 3.9 (ddd, *J* = 24.5, 16.1, 9.4 Hz, 3H), 3.7 – 3.5 (m, 1H).

**<sup>13</sup>C NMR** (101 MHz, DMSO) δ 160.6 (t, *J*<sub>C-F</sub> = 30.3 Hz), 160.4, 156.7, 153.8, 146.7, 137.6, 137.4, 132.3, 129.9, 129.4, 129.2, 129.1, 128.9, 128.0, 127.9, 127.7, 127.3, 127.0, 126.2, 123.5, 122.5, 120.2, 119.2, 117.1 (t, *J*<sub>C-F</sub> = 253.5 Hz), 114.1, 50.6 (d, *J*<sub>C-F</sub> = 7.0 Hz), 47.6 (d, *J*<sub>C-F</sub> = 6.0 Hz), 33.6 (t, *J*<sub>C-F</sub> = 21.2 Hz).

**<sup>19</sup>F NMR** (376 MHz, DMSO-*d*<sub>6</sub>) δ -108.3 (d, *J* = 262.0 Hz, 1F), -112.8 (d, *J* = 261.9 Hz, 1F).

**HRMS-ESI (m/z):** calcd for C<sub>32</sub>H<sub>24</sub>F<sub>2</sub>NO<sub>5</sub>S<sup>+</sup> [M+H]<sup>+</sup> 572.1338, found 572.1338.

**3,3-difluoro-4-(((4-(4-fluorophenyl)-2-oxo-2*H*-chromen-3-yl)sulfonyl)methyl)-1-phenylpyrrolidin-2-one (4ia).**

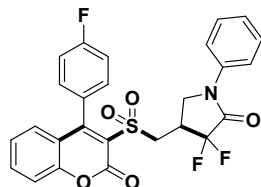

The product was purified by silica gel column chromatography with petroleum ether/ethyl acetate (6:1). White solid; m.p.: 188.1-190.6 °C; 66% yield;

**<sup>1</sup>H NMR** (400 MHz, DMSO-*d*<sub>6</sub>) δ 7.8 (t, *J* = 7.9 Hz, 1H), 7.6 (d, *J* = 8.1 Hz, 3H), 7.5 – 7.2 (m, 8H), 7.0 (d, *J* = 8.1 Hz, 1H), 4.2 (dd, *J* = 14.6, 4.1 Hz, 1H), 3.9 (ddd, *J* = 21.4, 17.2, 9.9 Hz, 3H), 3.7 – 3.4 (m, 1H).

<sup>13</sup>C NMR (101 MHz, DMSO) δ 163.6, 161.2, 160.6 (t,  $J_{C-F}$  = 30.2 Hz), 159.8, 156.5, 153.2, 137.6, 135.3, 130.4 (d,  $J_{C-F}$  = 8.6 Hz), 129.5 (d,  $J_{C-F}$  = 8.3 Hz), 129.4, 129.3, 129.1, 128.4 (d,  $J_{C-F}$  = 3.2 Hz), 126.2, 125.3, 123.6, 120.2, 120.2, 117.2 (t,  $J_{C-F}$  = 249.5 Hz), 116.7, 115.0 (dd,  $J_{C-F}$  = 22.0, 11.9 Hz), 50.6 (d,  $J_{C-F}$  = 7.0 Hz), 47.6 (d,  $J_{C-F}$  = 6.3 Hz), 33.5 (t,  $J_{C-F}$  = 21.2 Hz).

<sup>19</sup>F NMR (376 MHz, DMSO-*d*<sub>6</sub>) δ -108.1 (d,  $J$  = 262.0 Hz, 1F), -112.7 (d,  $J$  = 261.7 Hz, 1F), -112.8(s, 1F).

HRMS-ESI (m/z): calcd for C<sub>26</sub>H<sub>19</sub>F<sub>3</sub>NO<sub>5</sub>S<sup>+</sup> [M+H]<sup>+</sup> 514.0931, found 514.0928.

#### 4-(((4-(4-chlorophenyl)-2-oxo-2H-chromen-3-yl)sulfonyl)methyl)-3,3-difluoro-1-phenylpyrrolidin-2-one (4ja).

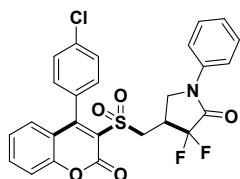

The product was purified by silica gel column chromatography with petroleum ether/ethyl acetate (6:1). White solid; m.p.: 297.3-299.9 °C; 65% yield;

<sup>1</sup>H NMR (400 MHz, DMSO-*d*<sub>6</sub>) δ 7.8 (t,  $J$  = 7.9 Hz, 1H), 7.6 (d,  $J$  = 7.9 Hz, 4H), 7.5 (d,  $J$  = 8.4 Hz, 1H), 7.5 (t,  $J$  = 7.8 Hz, 2H), 7.4 (d,  $J$  = 8.1 Hz, 2H), 7.4 (d,  $J$  = 7.7 Hz, 1H), 7.3 (t,  $J$  = 7.5 Hz, 1H), 7.0 (d,  $J$  = 8.1 Hz, 1H), 4.2 (dd,  $J$  = 14.6, 4.2 Hz, 1H), 4.0 – 3.8 (m, 3H), 3.7 – 3.5 (m, 1H).

<sup>13</sup>C NMR (101 MHz, DMSO) δ 160.6 (t,  $J_{C-F}$  = 30.2 Hz), 159.5, 156.4, 153.2, 137.5, 135.4, 133.8, 131.1, 130.0, 129.3, 129.1, 129.1, 128.0, 127.9, 126.2, 125.4, 123.5, 120.2, 120.0, 117.1 (t,  $J_{C-F}$  = 253.5 Hz), 116.7, 50.6 (d,  $J_{C-F}$  = 7.1 Hz), 47.6 (d,  $J_{C-F}$  = 6.0 Hz), 33.5 (t,  $J_{C-F}$  = 20.2 Hz).

<sup>19</sup>F NMR (376 MHz, DMSO-*d*<sub>6</sub>) δ -108.1 (d,  $J$  = 261.6 Hz, 1F), -112.7 (d,  $J$  = 261.9 Hz, 1F).

HRMS-ESI (m/z): calcd for C<sub>26</sub>H<sub>19</sub>ClF<sub>2</sub>NO<sub>5</sub>S<sup>+</sup> [M+H]<sup>+</sup> 530.0635, found 530.0633.

#### 3,3-difluoro-4-(((2-oxo-4-(p-tolyl)-2H-chromen-3-yl)sulfonyl)methyl)-1-phenylpyrrolidin-2-one (4ka).

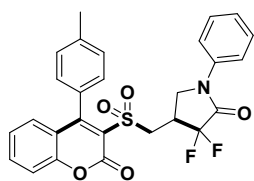

The product was purified by silica gel column chromatography with petroleum ether/ethyl acetate (8:1). White solid; m.p.: 210.2-212.7 °C; 48% yield;

<sup>1</sup>H NMR (400 MHz, DMSO-*d*<sub>6</sub>) δ 7.6 (d,  $J$  = 8.0 Hz, 2H), 7.5 (dd,  $J$  = 15.6, 6.7 Hz, 6H), 7.3 (d,  $J$  = 6.7 Hz, 2H), 7.3 (t,  $J$  = 7.5 Hz, 1H), 7.2 (d,  $J$  = 8.4 Hz, 1H), 6.8 (d,  $J$  = 8.2 Hz, 1H), 4.2 (dd,  $J$  = 14.6, 4.1 Hz, 1H), 3.9 (t,  $J$  = 9.4 Hz, 1H), 3.8 (dd,  $J$  = 14.4, 9.0 Hz, 1H), 3.8 (d,  $J$  = 10.3 Hz, 1H), 3.6 – 3.4 (m, 1H).



$^{13}\text{C}$  NMR (101 MHz, DMSO)  $\delta$  161.4, 161.1, 157.2, 153.8, 147.5, 138.1, 132.8, 129.6, 129.6, 129.3, 128.3 (t,  $J_{\text{C-F}} = 19.2$  Hz), 127.5, 126.9, 126.7, 122.4, 120.7, 118.3, 117.7 (t,  $J_{\text{C-F}} = 246.4$  Hz), 117.1, 51.0 (d,  $J_{\text{C-F}} = 7.0$  Hz), 48.1 (d,  $J_{\text{C-F}} = 6.3$  Hz), 34.1 (t,  $J_{\text{C-F}} = 20.2$  Hz), 21.8.

$^{19}\text{F}$  NMR (376 MHz, DMSO- $d_6$ )  $\delta$  -108.3 (d,  $J = 261.6$  Hz, 1F), -112.8 (d,  $J = 261.9$  Hz, 1F).

HRMS-ESI (m/z): calcd for  $\text{C}_{27}\text{H}_{22}\text{F}_2\text{NO}_5\text{S}^+ [\text{M}+\text{H}]^+ 510.1181$ , found 510.1178.

**4-(((6-chloro-2-oxo-4-phenyl-2H-chromen-3-yl)sulfonyl)methyl)-3,3-difluoro-1-phenylpyrrolidin-2-one (4la) and 4-(((8-chloro-2-oxo-4-phenyl-2H-chromen-3-yl)sulfonyl)methyl)-3,3-difluoro-1-phenylpyrrolidin-2-one (4l'a).**

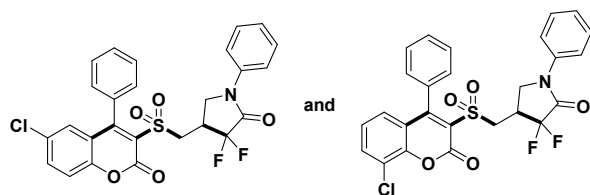

The product was purified by silica gel column chromatography with petroleum ether/ethyl acetate (8:1). White solid; m.p.: 211.9-213.4 °C; 75% yield;

$^1\text{H}$  NMR (400 MHz, DMSO- $d_6$ )  $\delta$  8.0 (d,  $J = 8.0$  Hz, 0.27H), 7.9 (d,  $J = 9.0$  Hz, 0.73H), 7.7 (d,  $J = 8.9$  Hz, 1H), 7.6 (d,  $J = 8.1$  Hz, 2H), 7.6 – 7.4 (m, 5H), 7.4 (d,  $J = 6.7$  Hz, 2H), 7.3 (t,  $J = 7.5$  Hz, 1H), 6.9 (d,  $J = 8.2$  Hz, 0.27H), 6.8 (d,  $J = 2.4$  Hz, 0.73H), 4.2 (dd,  $J = 14.8, 4.5$  Hz, 1H), 4.0 – 3.8 (m, 3H), 3.7 – 3.5 (m, 1H).

$^{13}\text{C}$  NMR (101 MHz, DMSO)  $\delta$  160.6 (t,  $J_{\text{C-F}} = 31.3$  Hz), 160.2, 159.2, 156.2, 155.8, 151.9, 148.7, 137.5, 134.8, 134.7, 132.0, 131.6, 129.2, 129.1, 129.1, 129.0, 128.4, 128.0, 127.9, 127.7, 127.1, 127.0, 126.2, 125.5, 124.4, 124.0, 122.0, 121.8, 120.2, 119.0, 117.1 (t,  $J_{\text{C-F}} = 253.5$  Hz), 50.7 (d,  $J_{\text{C-F}} = 7.0$  Hz), 47.6 (d,  $J_{\text{C-F}} = 5.0$  Hz), 33.5 (t,  $J_{\text{C-F}} = 20.2$  Hz).

$^{19}\text{F}$  NMR (376 MHz, DMSO- $d_6$ )  $\delta$  -108.2 (d,  $J = 261.6$  Hz, 1F), -112.8 (d,  $J = 261.9$  Hz, 1F).

HRMS-ESI (m/z): calcd for  $\text{C}_{26}\text{H}_{19}\text{ClF}_2\text{NO}_5\text{S}^+ [\text{M}+\text{H}]^+ 530.0635$ , found 530.0633.

**3,3-difluoro-4-(((4-methyl-2-oxo-2H-chromen-3-yl)sulfonyl)methyl)-1-phenylpyrrolidin-2-one (4ma).**

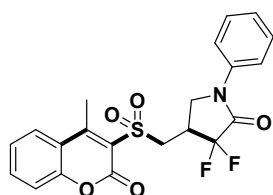

The product was purified by silica gel column chromatography with petroleum ether/ethyl acetate (10:1). White solid; m.p.: 197.1-199.5 °C; 33% yield;

$^1\text{H}$  NMR (400 MHz, DMSO- $d_6$ )  $\delta$  8.1 (dd,  $J = 8.1, 1.5$  Hz, 1H), 7.8 (ddd,  $J = 8.6, 7.2, 1.5$  Hz, 1H), 7.7 (d,  $J = 7.6$  Hz, 2H), 7.5 (d,  $J = 8.6$  Hz, 1H), 7.5 (t,  $J = 8.0$  Hz, 2H), 7.3 (t,  $J = 7.4$  Hz, 1H), 4.2 (dd,  $J = 14.6, 5.0$  Hz, 1H), 4.1 (ddd,  $J = 10.2, 8.6, 1.7$  Hz, 1H), 4.0 – 4.0 (m, 1H), 3.9 (dd,  $J = 14.6, 8.4$  Hz, 1H), 3.7 – 3.5 (m, 1H), 3.0 (s, 3H).

**<sup>13</sup>C NMR** (101 MHz, DMSO)  $\delta$  160.9, 160.7 (t,  $J_{\text{C-F}} = 30.2$  Hz), 156.2, 152.6, 137.6, 135.2, 129.1, 127.6, 126.2, 125.3, 123.1, 120.3, 119.5, 117.2 (t,  $J_{\text{C-F}} = 249.5$  Hz), 116.7, 51.1 (d,  $J_{\text{C-F}} = 7.0$  Hz), 47.6 (d,  $J_{\text{C-F}} = 7.0$  Hz), 33.7 (t,  $J_{\text{C-F}} = 21.2$  Hz), 14.7.

**<sup>19</sup>F NMR** (376 MHz, DMSO-*d*<sub>6</sub>)  $\delta$  -107.8 (d,  $J = 262.3$  Hz, 1F), -112.6 (d,  $J = 262.2$  Hz, 1F).

**HRMS-ESI (m/z)**: calcd for C<sub>21</sub>H<sub>18</sub>F<sub>2</sub>NO<sub>5</sub>S<sup>+</sup> [M+H]<sup>+</sup> 434.0868, found 434.0864.

## 8. $^1\text{H}$ , $^{13}\text{C}$ and $^{19}\text{F}$ NMR spectra for products.

$^1\text{H}$  NMR-spectrum (400 MHz,  $\text{DMSO-d}_6$ ) of **3aa**

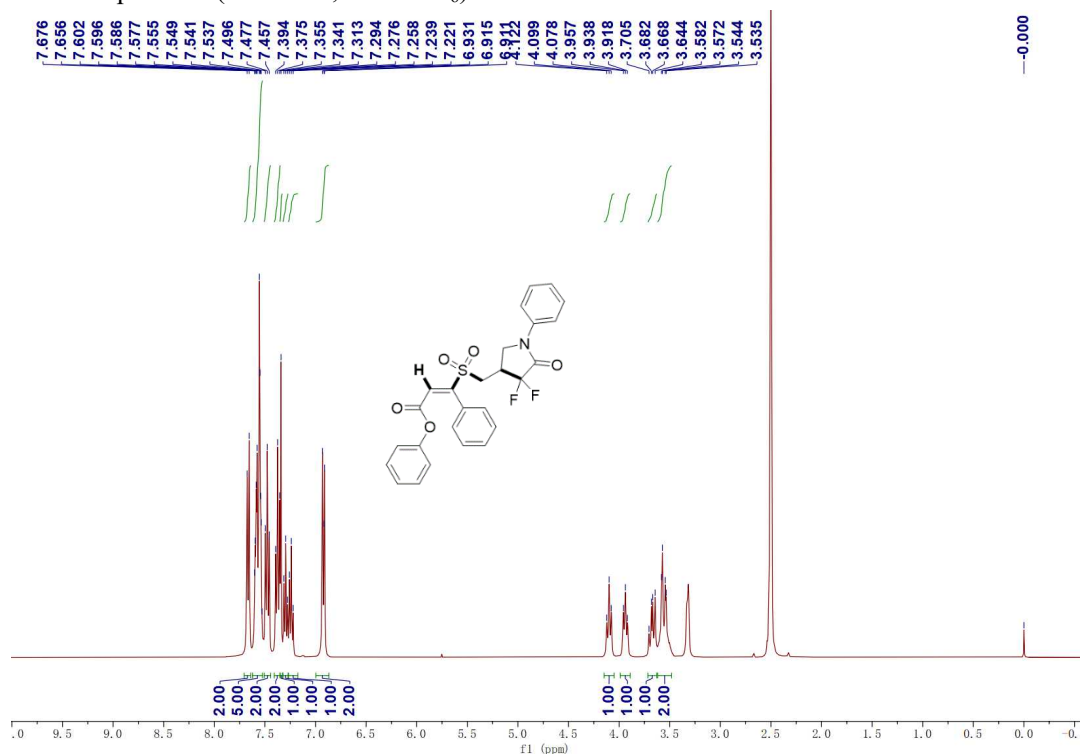

$^{13}\text{C}$  NMR-spectrum (101 MHz,  $\text{DMSO-d}_6$ ) of **3aa**

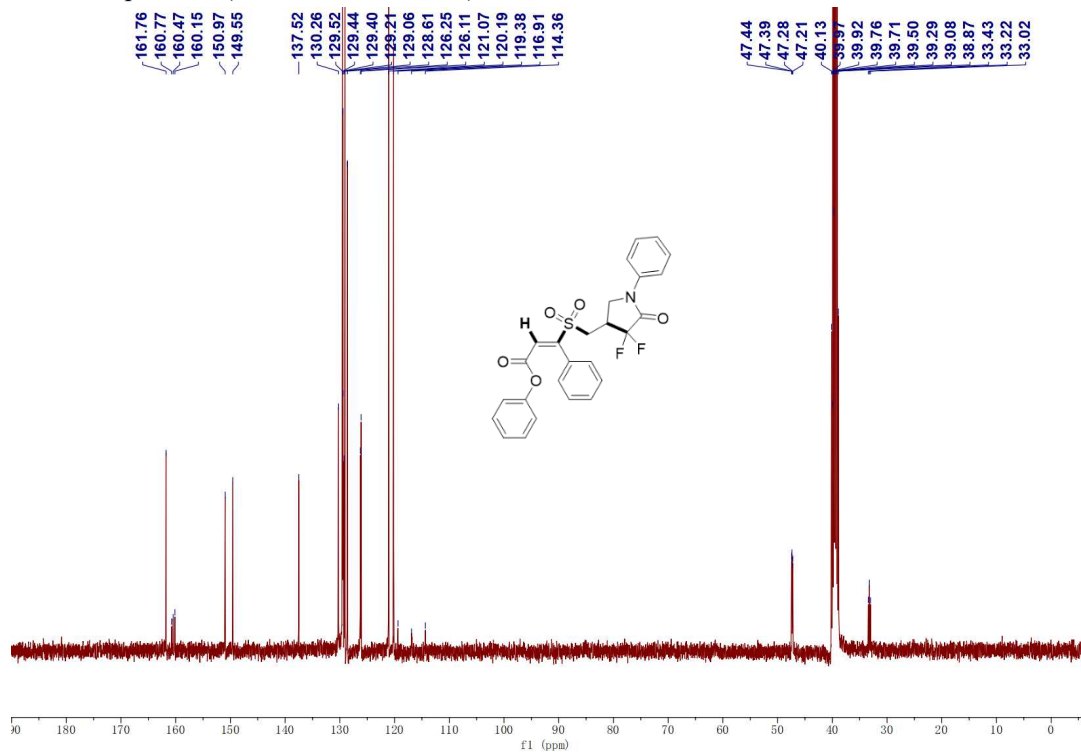

<sup>19</sup>F NMR-spectrum (376 MHz, DMSO-*d*<sub>6</sub>) of **3aa**

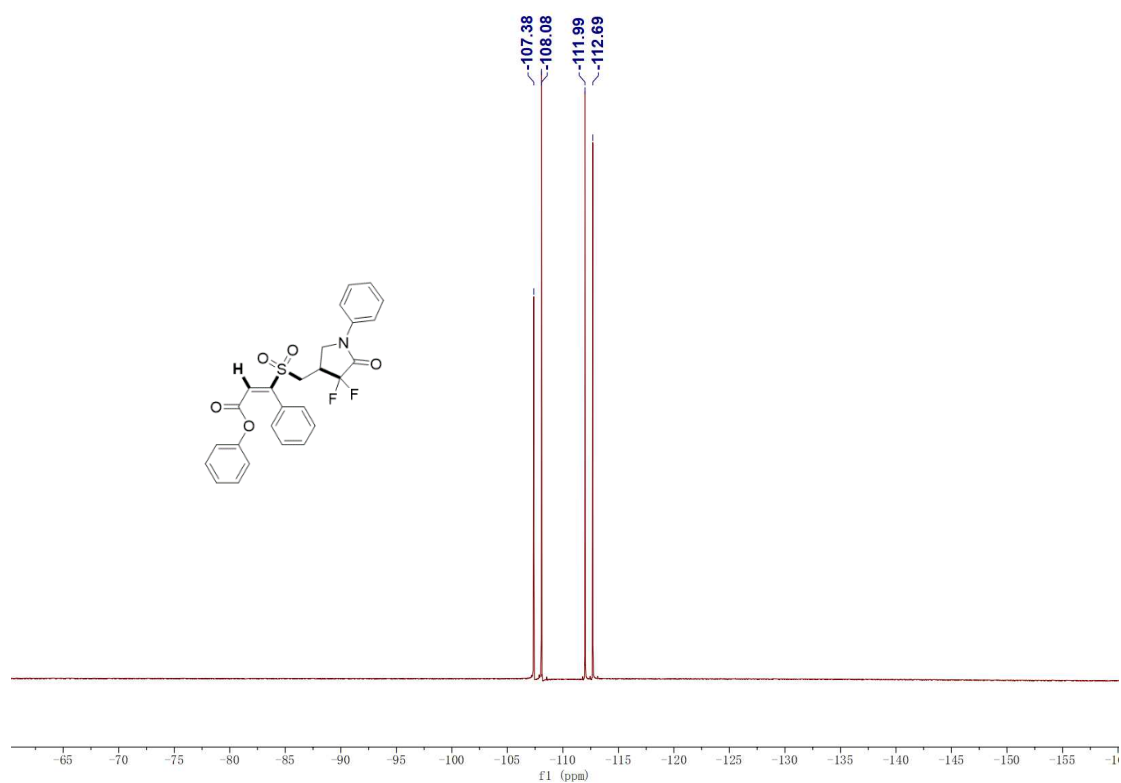

<sup>1</sup>H NMR-spectrum (400 MHz, DMSO-*d*<sub>6</sub>) of **3ab**

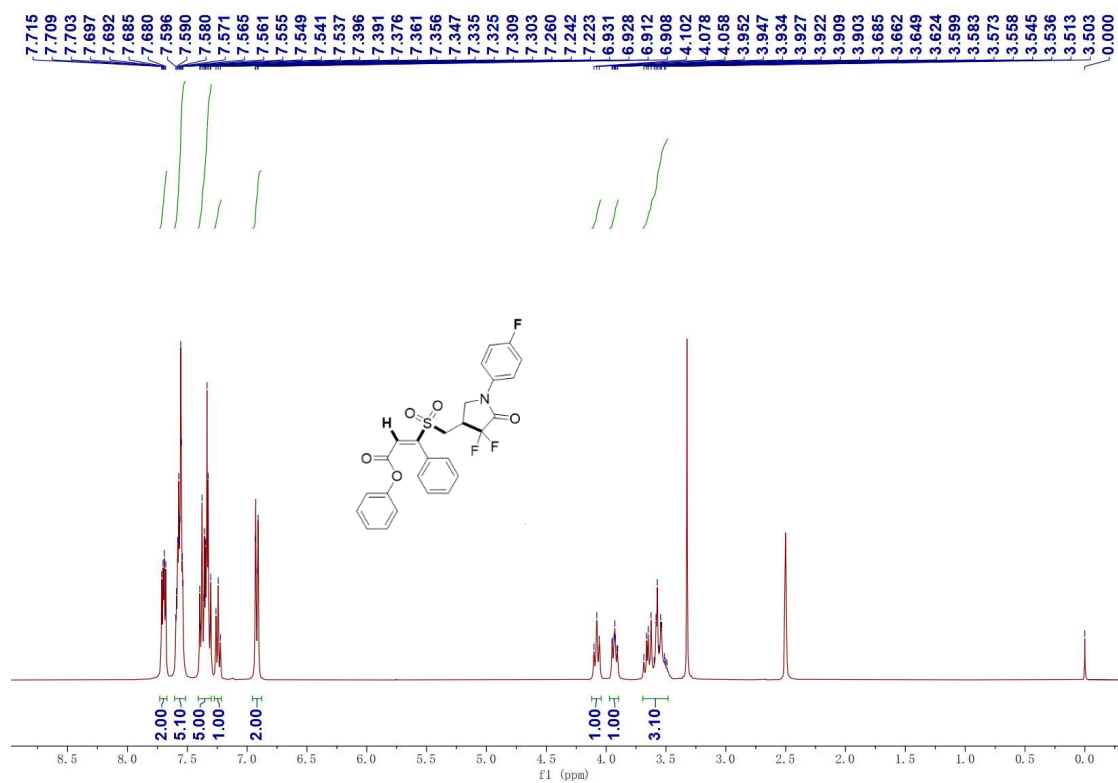

<sup>13</sup>C NMR-spectrum (101MHz, DMSO-*d*<sub>6</sub>) of **3ab**

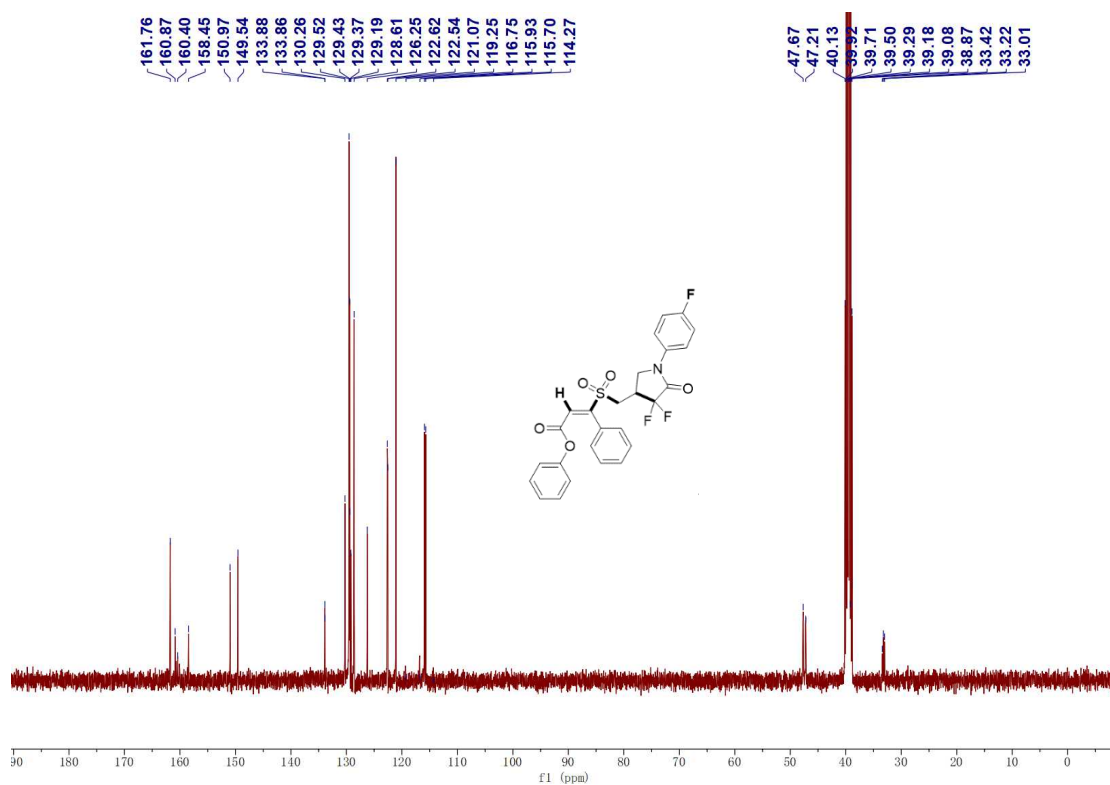

<sup>19</sup>F NMR-spectrum (376 MHz, DMSO-*d*<sub>6</sub>) of **3ab**

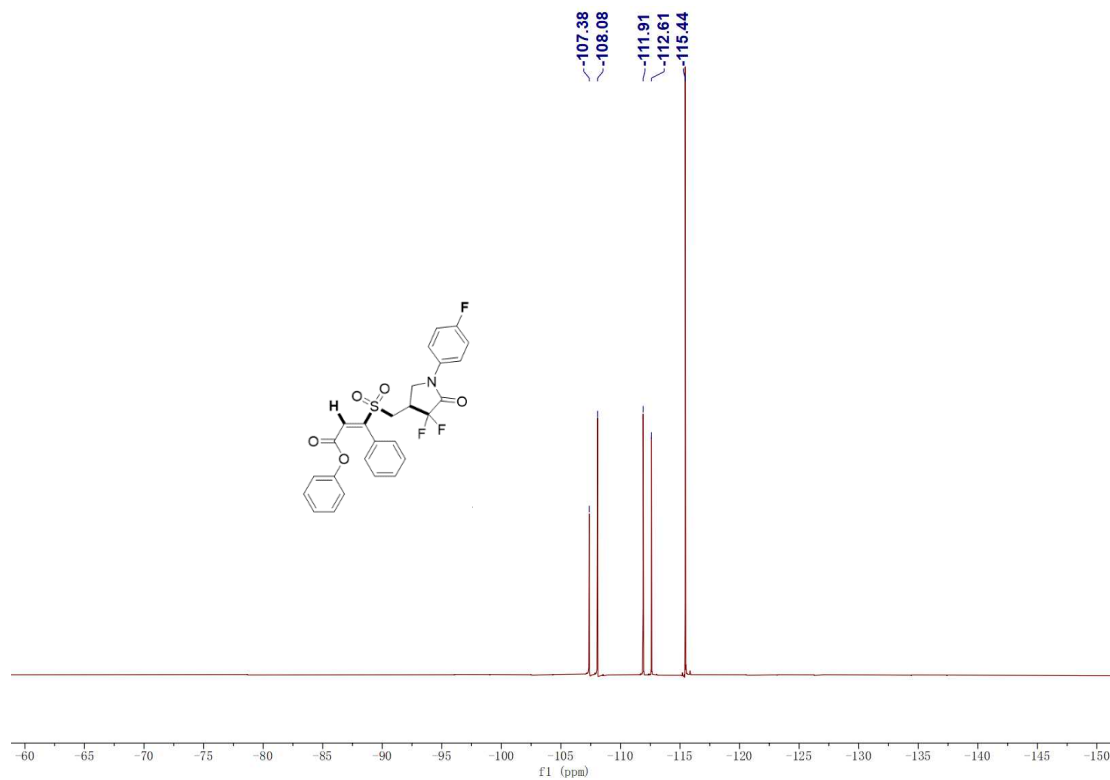

<sup>1</sup>H NMR-spectrum (400 MHz, DMSO-d<sub>6</sub>) of 3ac

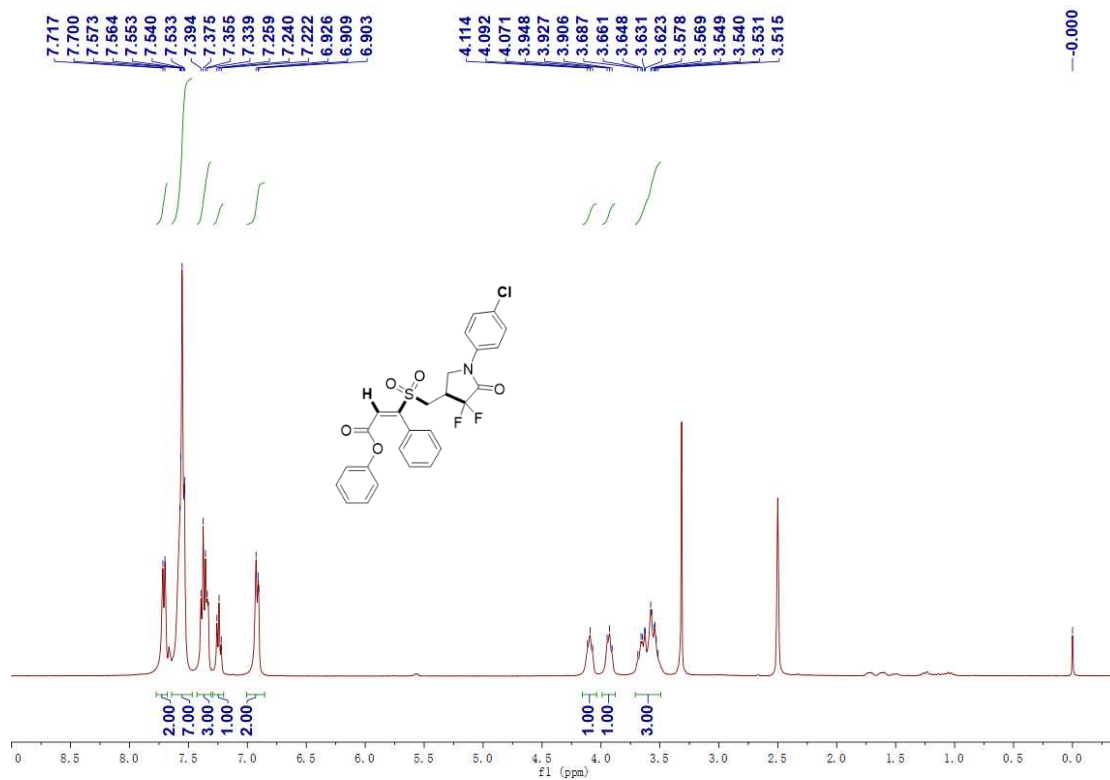

<sup>13</sup>C NMR-spectrum (101 MHz, DMSO-d<sub>6</sub>) of 3ac

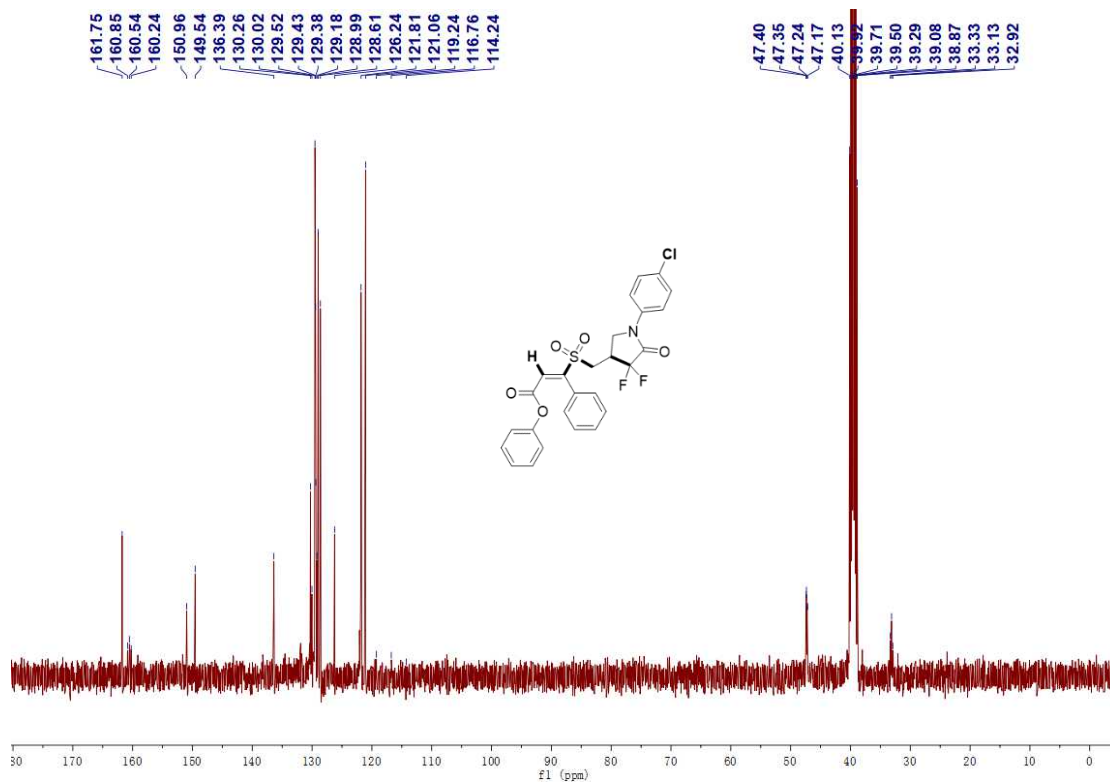

<sup>19</sup>F NMR-spectrum (376 MHz, DMSO-*d*<sub>6</sub>) of **3ac**

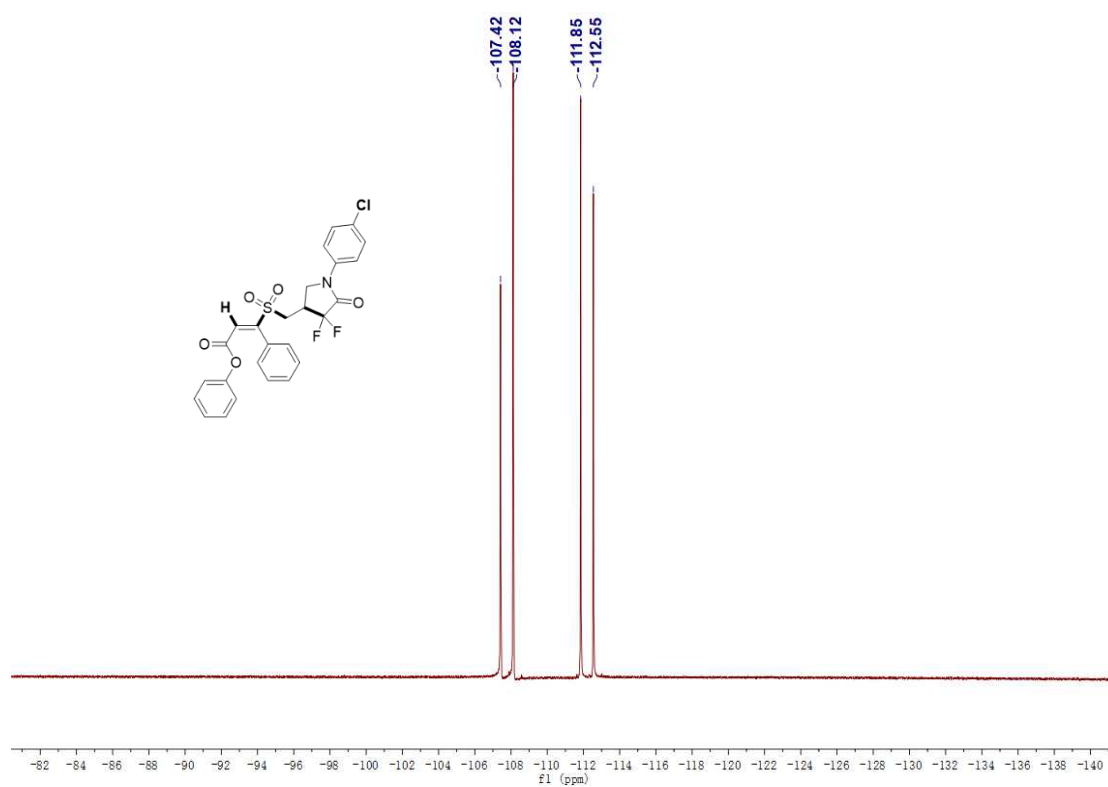

<sup>1</sup>H NMR-spectrum (400 MHz, DMSO-*d*<sub>6</sub>) of **3ad**

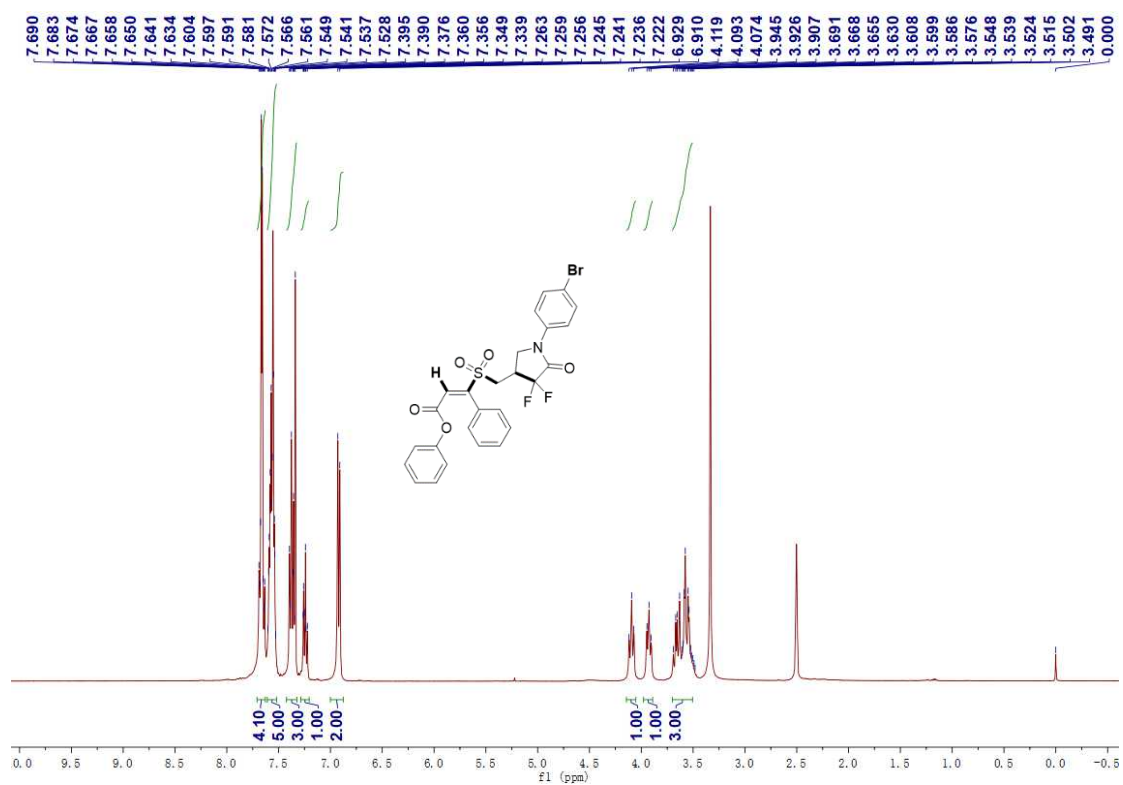

<sup>13</sup>C NMR-spectrum (101 MHz, DMSO-*d*<sub>6</sub>) of **3ad**

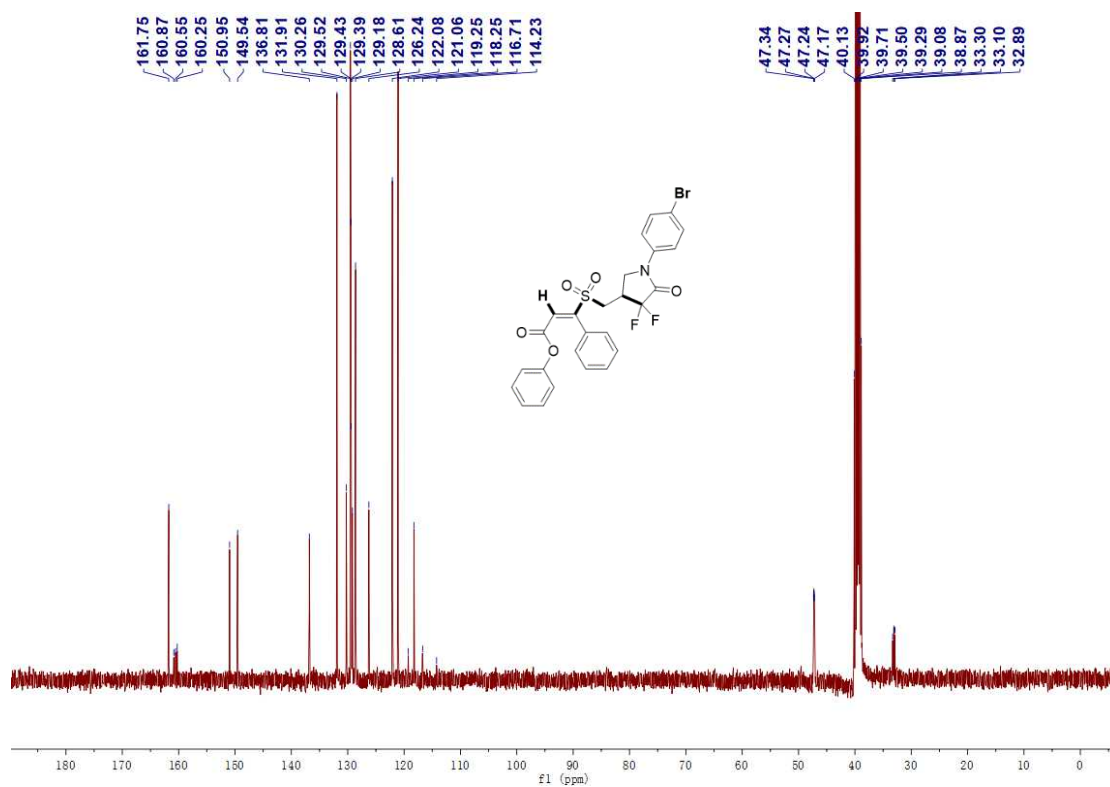

<sup>19</sup>F NMR-spectrum (376 MHz, DMSO-*d*<sub>6</sub>) of **3ad**

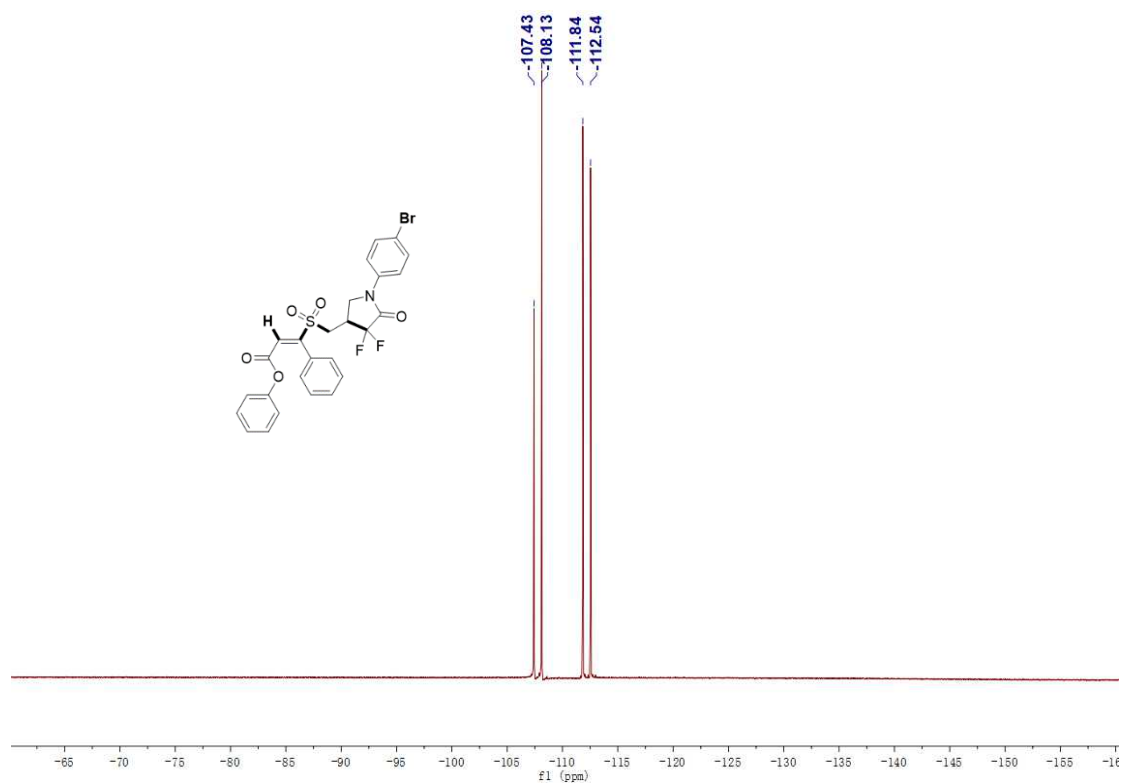



<sup>1</sup>H NMR-spectrum (600 MHz, DMSO-d<sub>6</sub>) of **3ae**

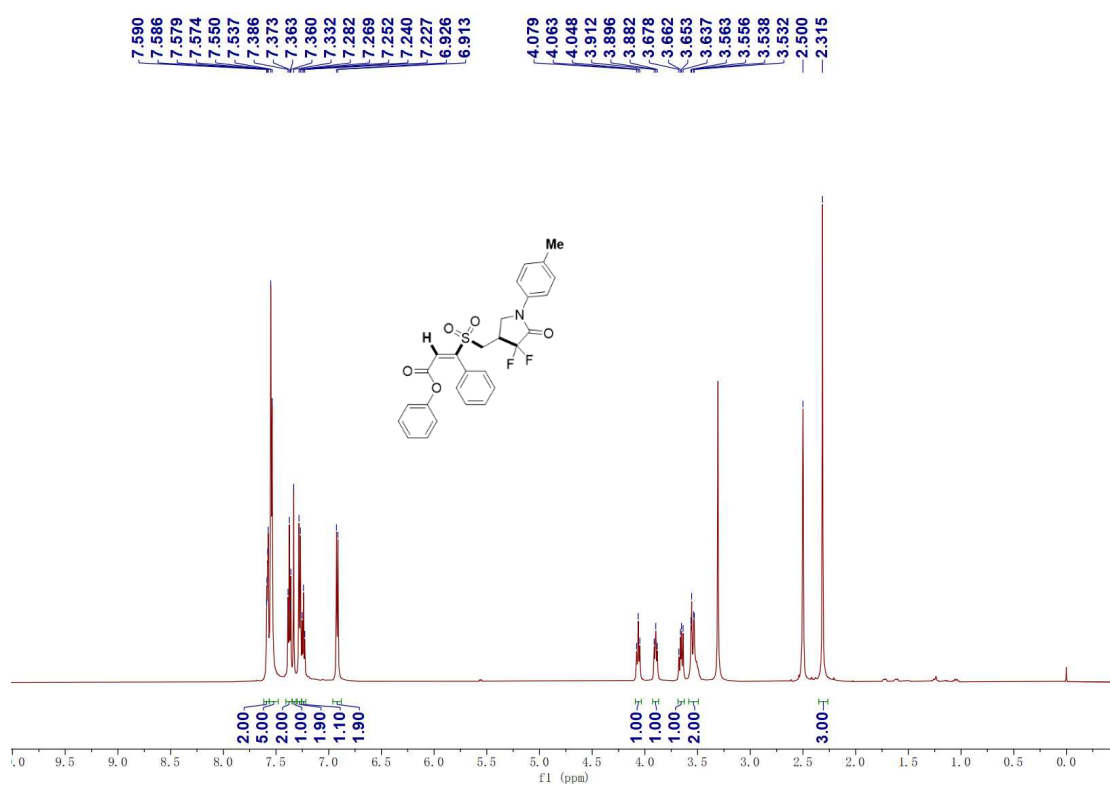

<sup>13</sup>C NMR-spectrum (151 MHz, DMSO-d<sub>6</sub>) of **3ae**

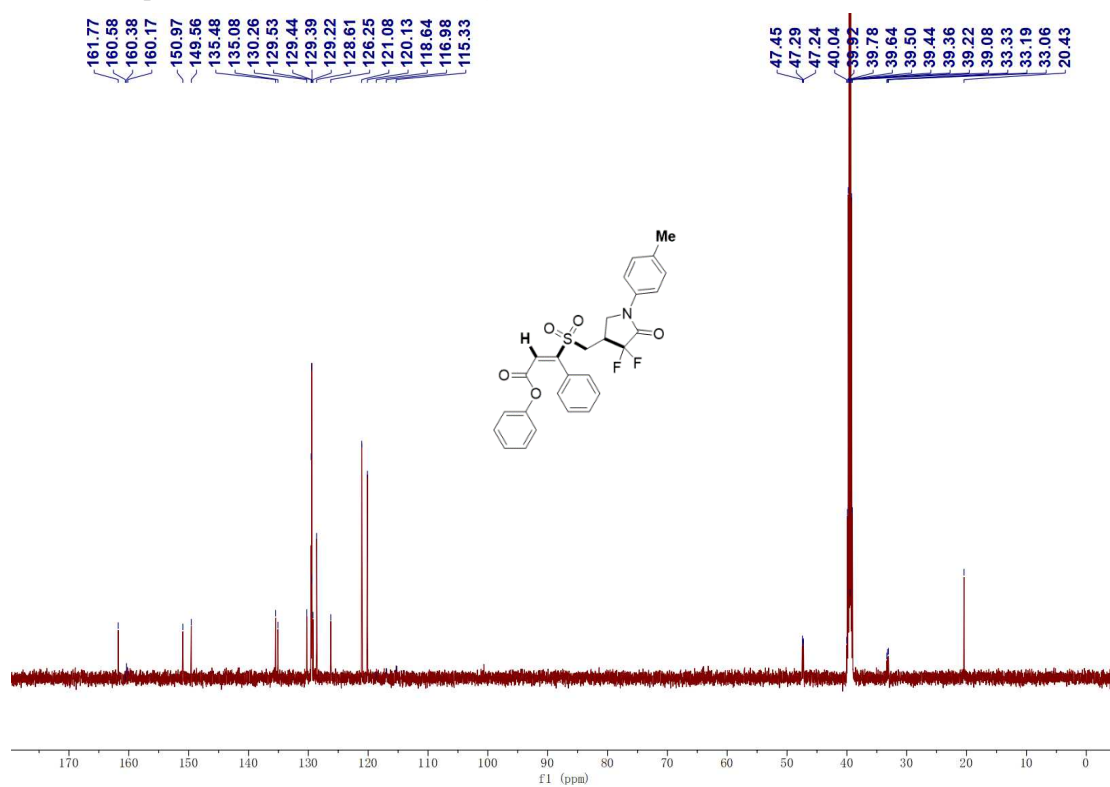

$^{19}\text{F}$  NMR-spectrum (565 MHz,  $\text{DMSO-}d_6$ ) of **3ae**

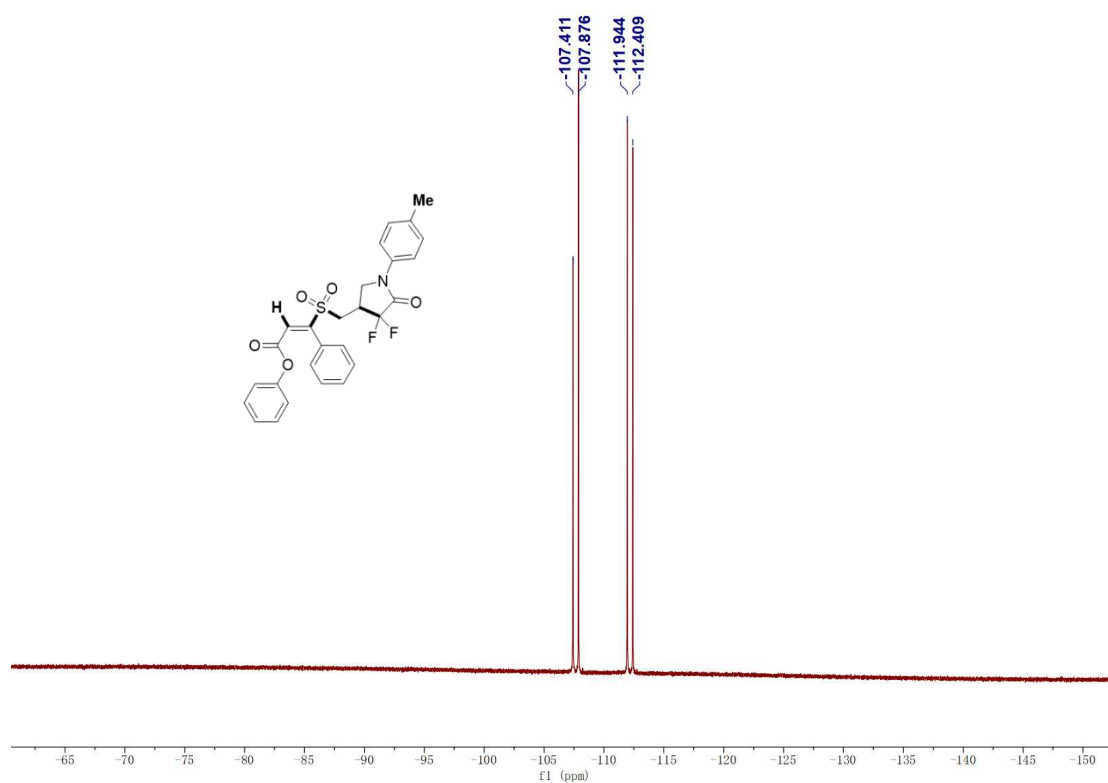

$^1\text{H}$  NMR-spectrum (400 MHz,  $\text{DMSO-}d_6$ ) of **3af**

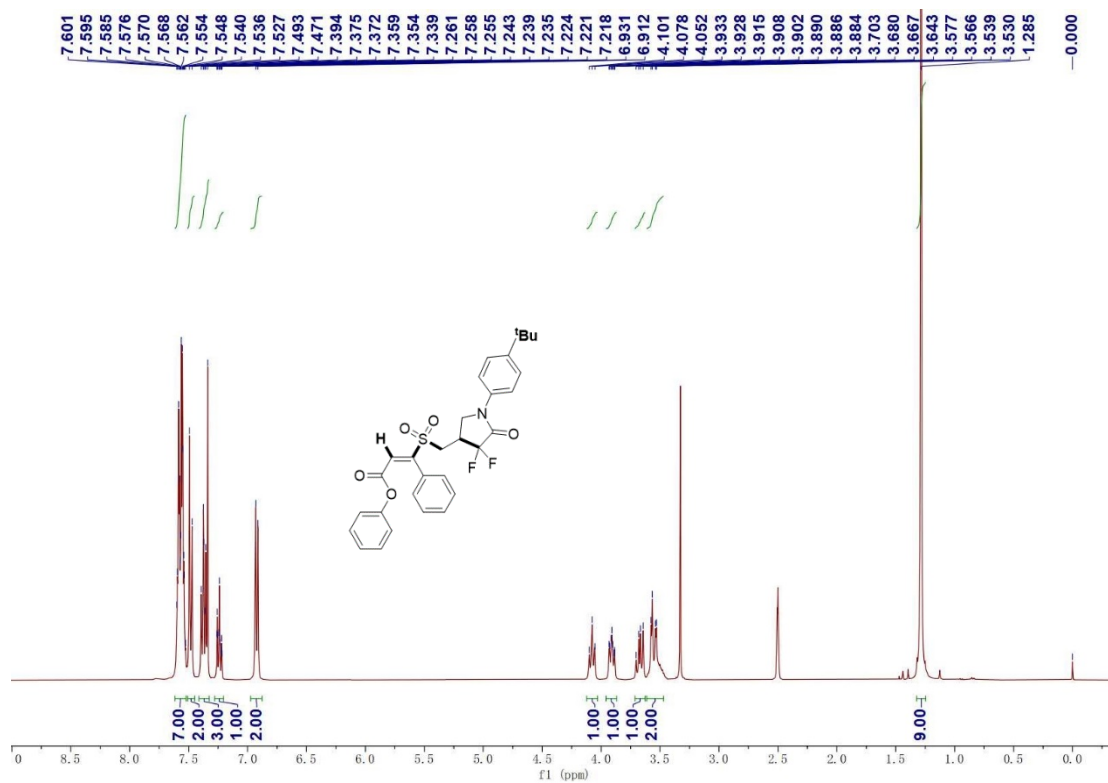

<sup>13</sup>C NMR-spectrum (101 MHz, DMSO-*d*<sub>6</sub>) of **3af**

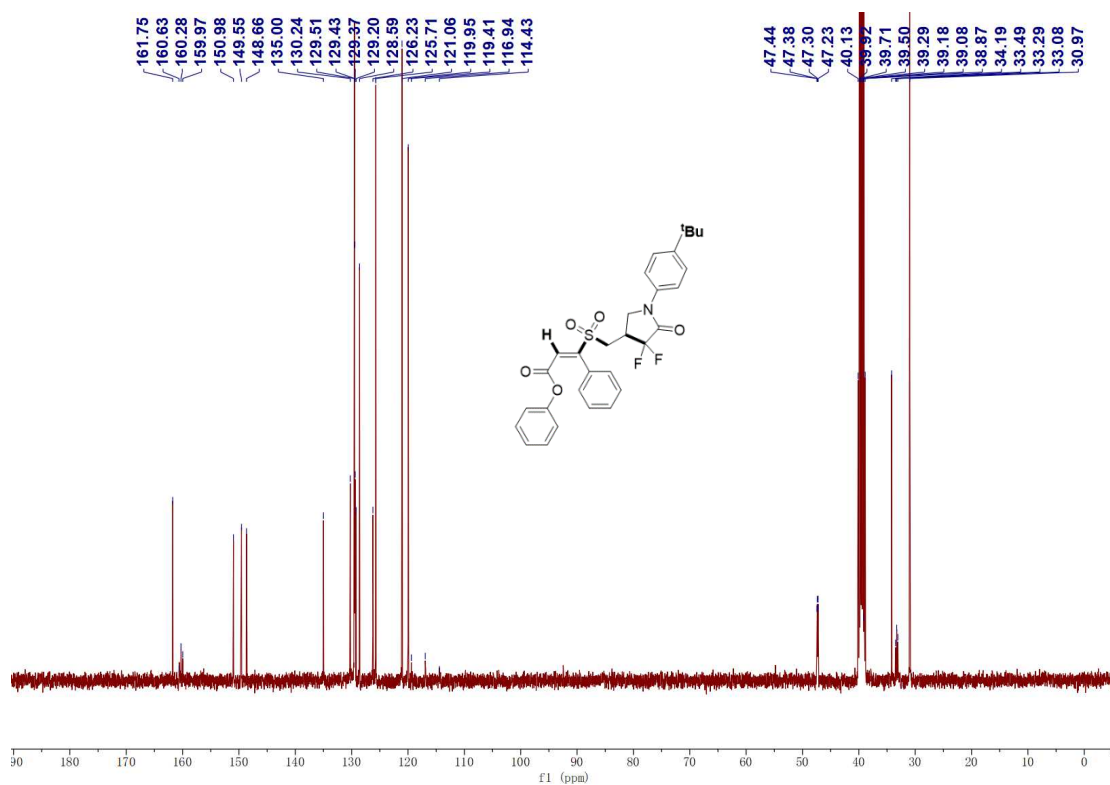

<sup>19</sup>F NMR-spectrum (376 MHz, DMSO-*d*<sub>6</sub>) of **3af**

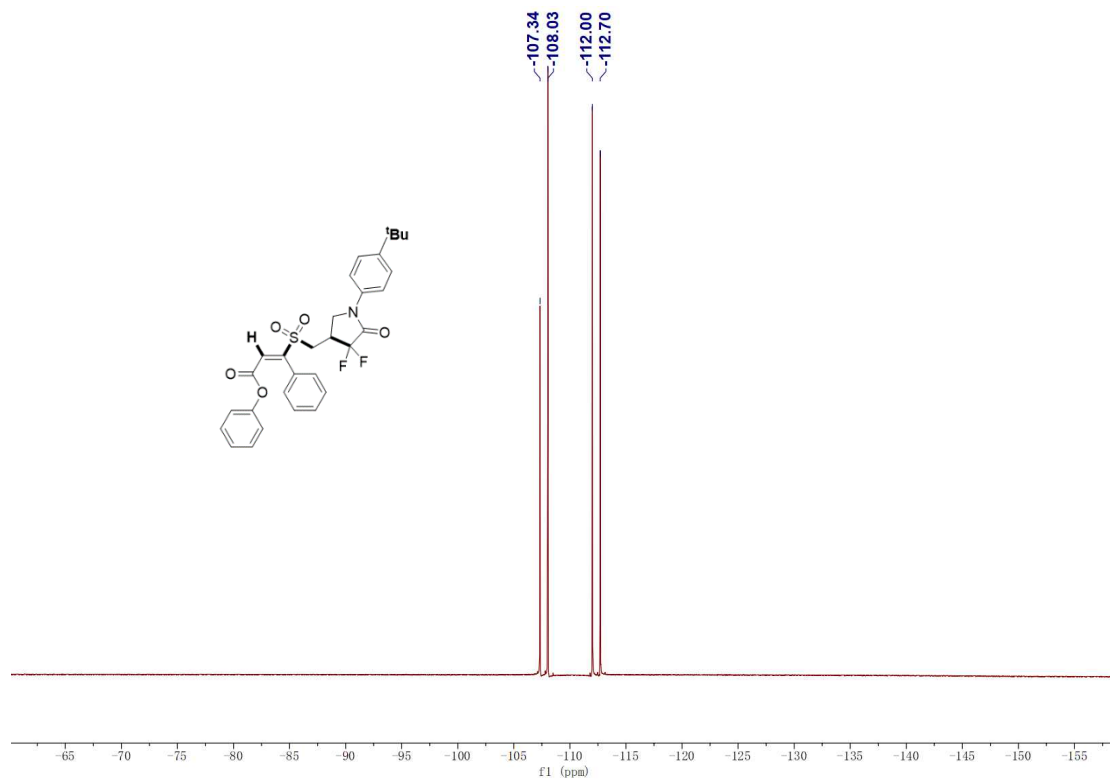

<sup>1</sup>H NMR-spectrum (400 MHz, DMSO-*d*<sub>6</sub>) of **3ag**

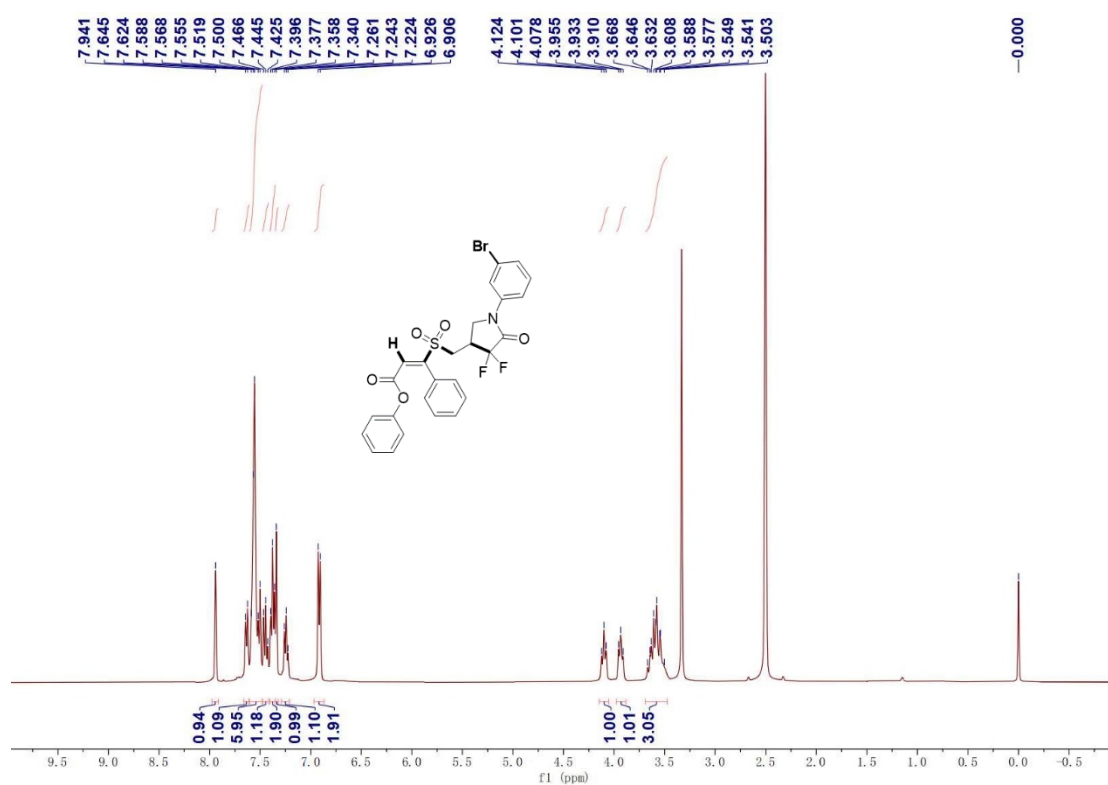

<sup>13</sup>C NMR-spectrum (101 MHz, DMSO-*d*<sub>6</sub>) of **3ag**

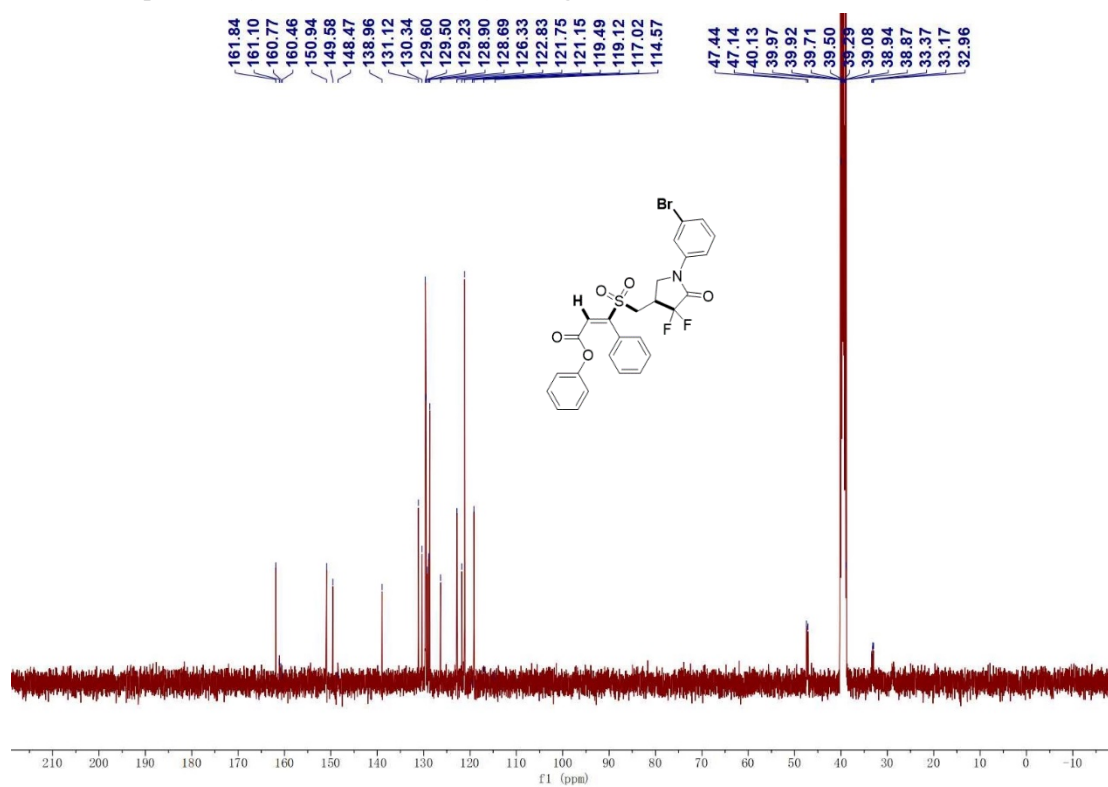

<sup>19</sup>F NMR-spectrum (376 MHz, DMSO-*d*<sub>6</sub>) of **3ag**

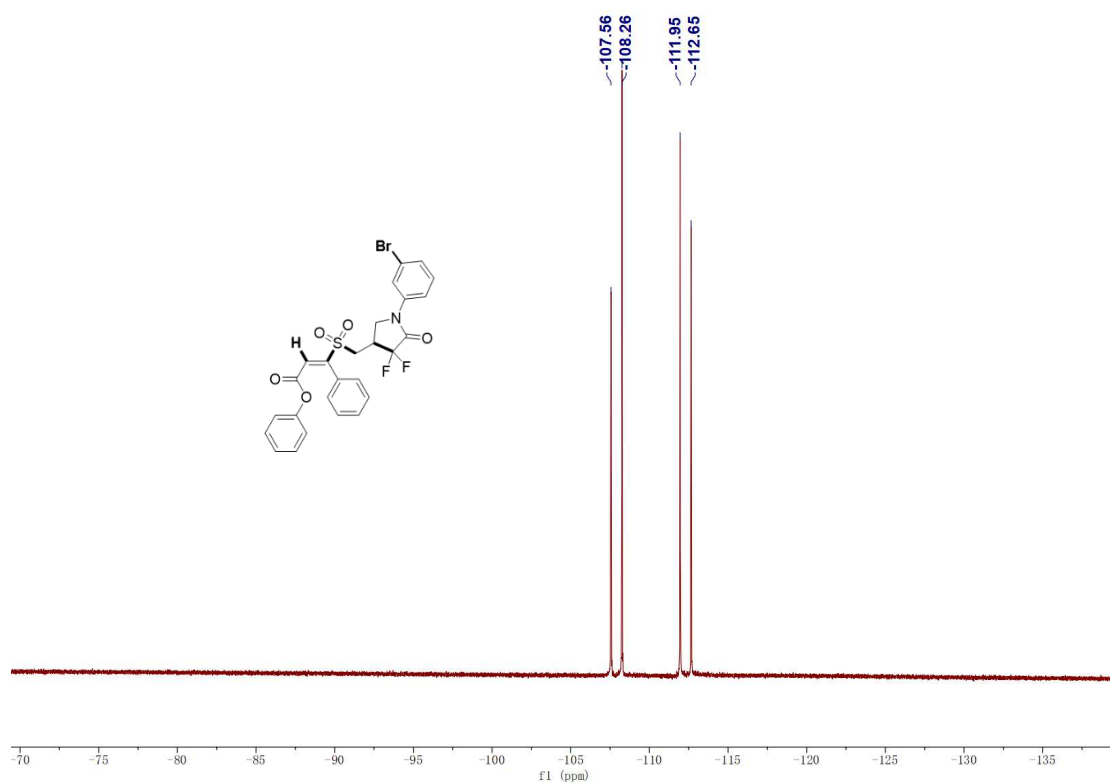

<sup>1</sup>H NMR-spectrum (400 MHz, DMSO-*d*<sub>6</sub>) of **3ah**

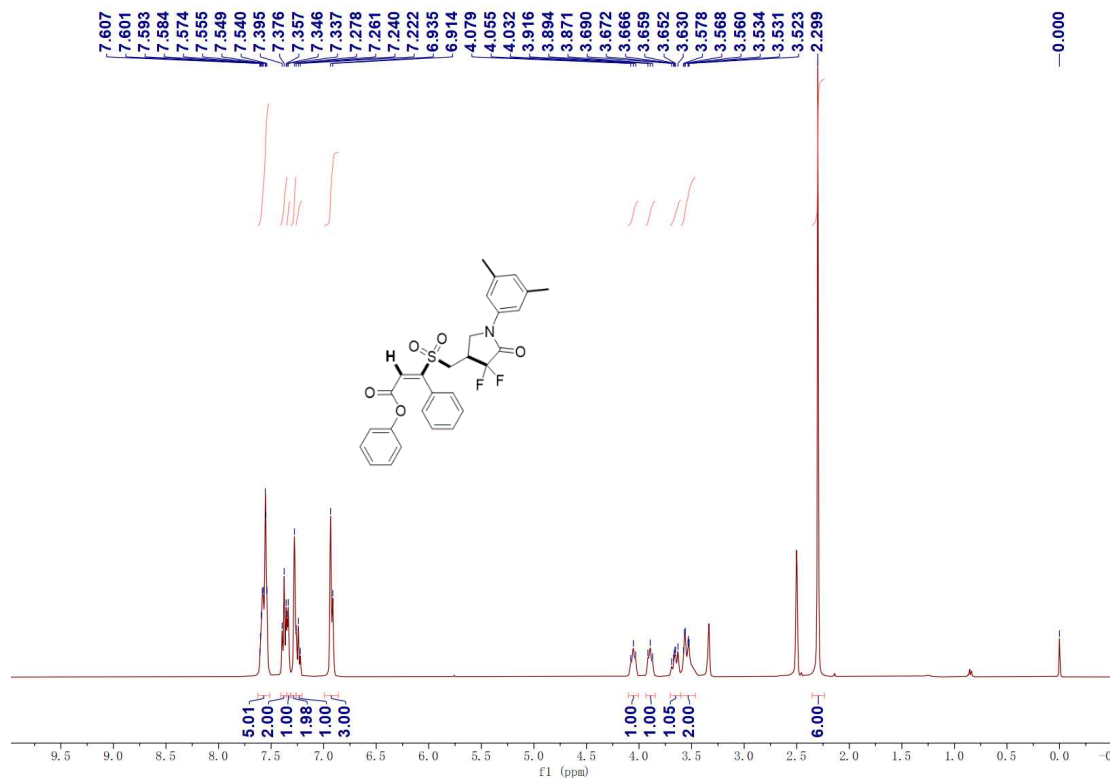

<sup>13</sup>C NMR-spectrum (101 MHz, DMSO-*d*<sub>6</sub>) of **3ah**

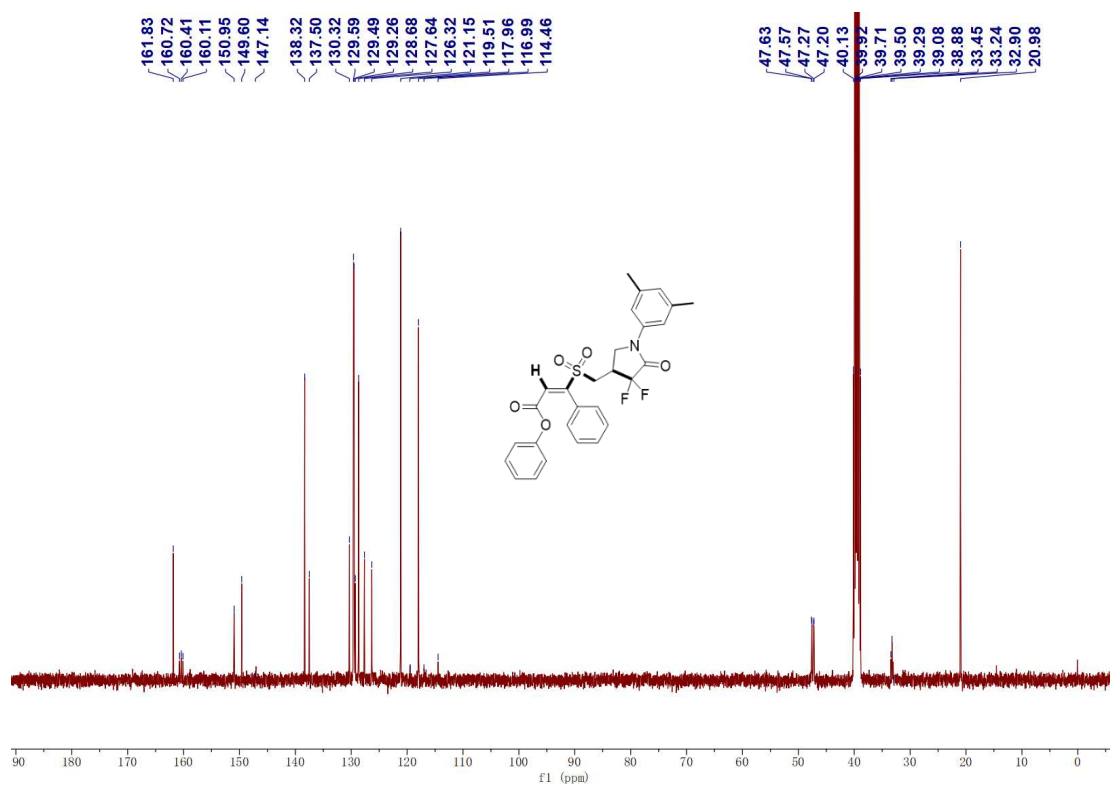

<sup>19</sup>F NMR-spectrum (376 MHz, DMSO-*d*<sub>6</sub>) of **3ah**

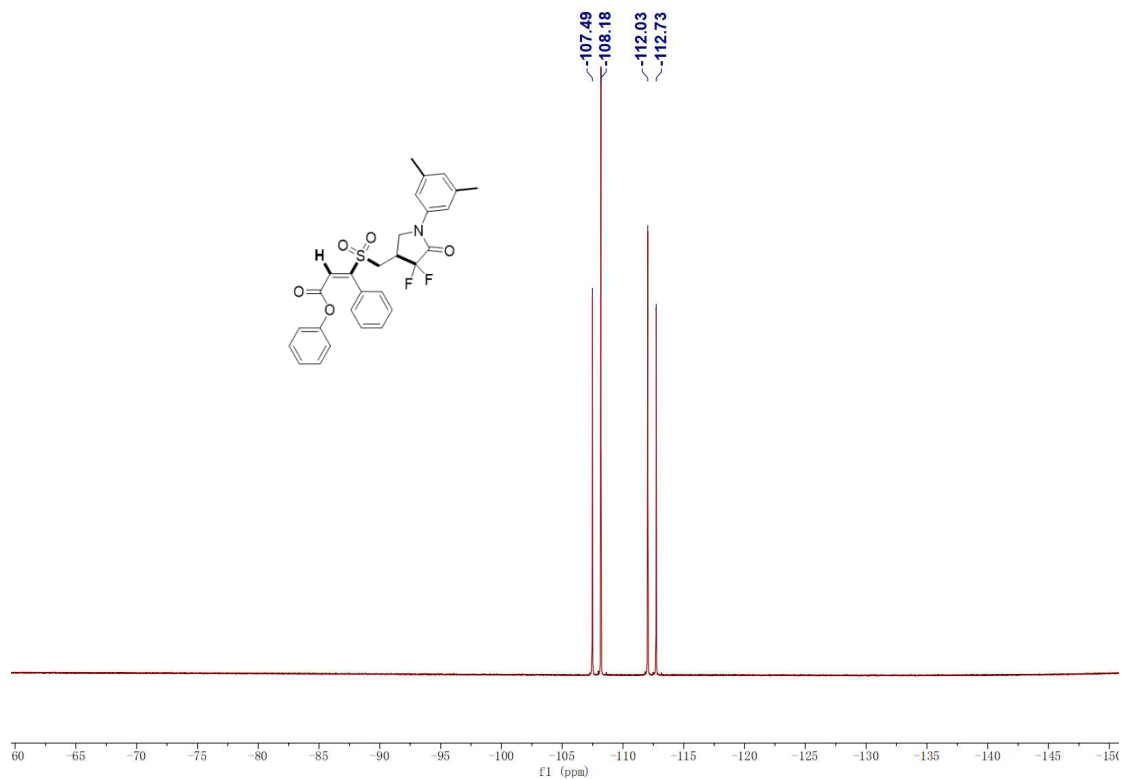

<sup>1</sup>H NMR-spectrum (400 MHz, DMSO-d<sub>6</sub>) of **3ai**

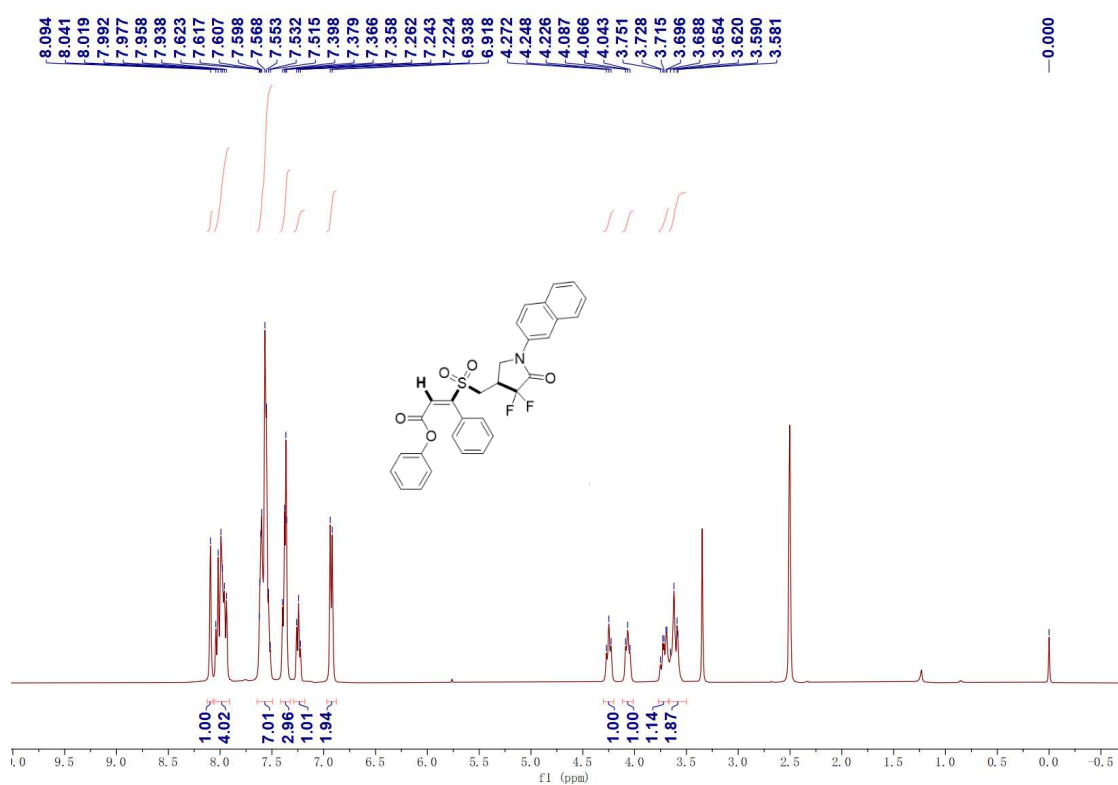

<sup>13</sup>C NMR-spectrum (101 MHz, DMSO-d<sub>6</sub>) of **3ai**

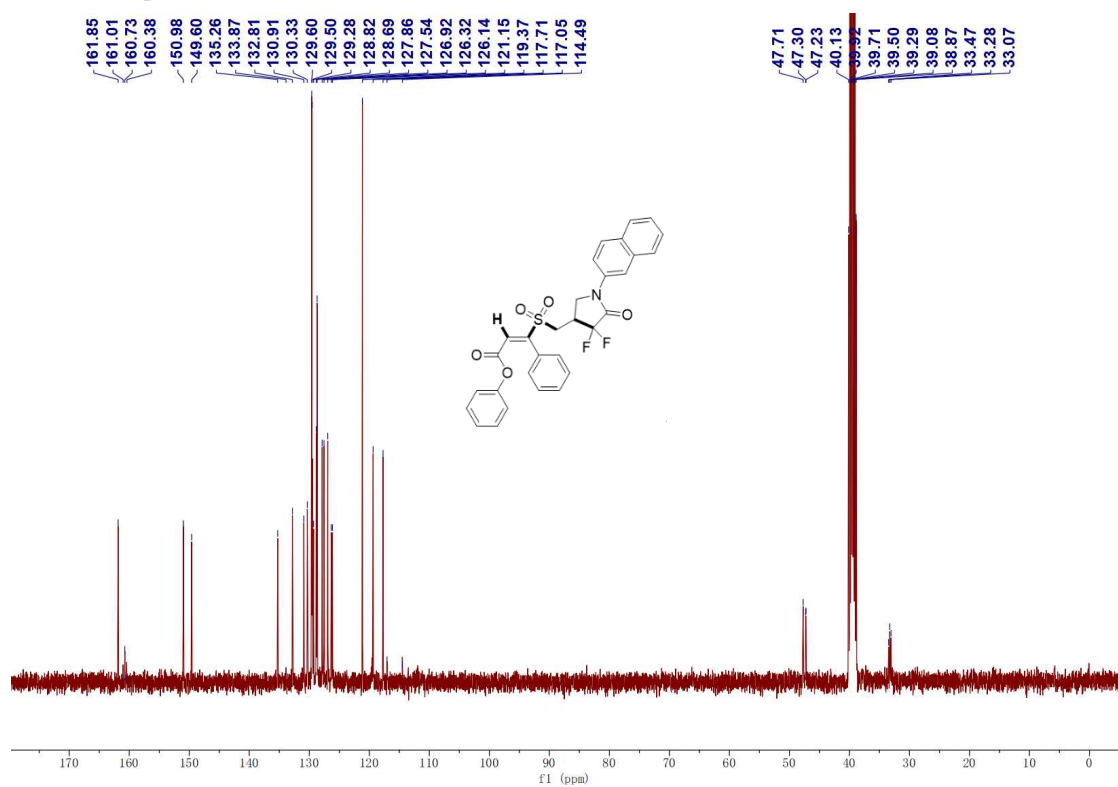

<sup>19</sup>F NMR-spectrum (101 MHz, DMSO-*d*<sub>6</sub>) of **3ai**

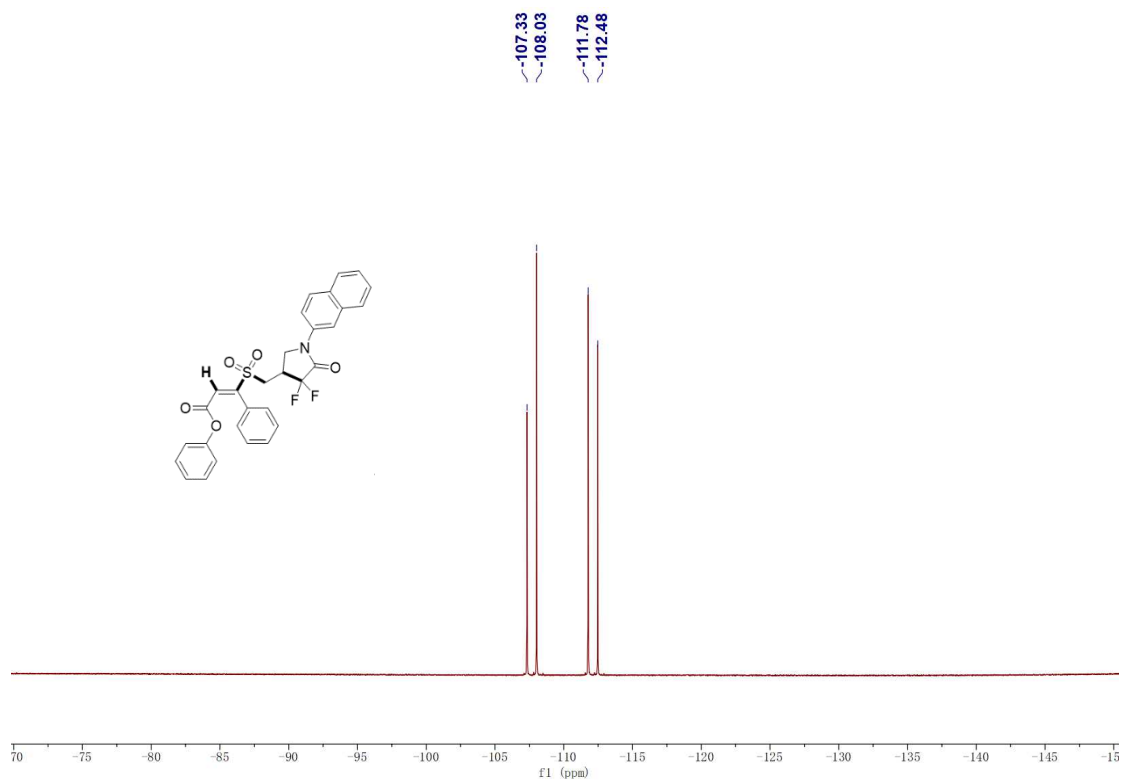

<sup>1</sup>H NMR-spectrum (400 MHz, DMSO-*d*<sub>6</sub>) of **3ba**

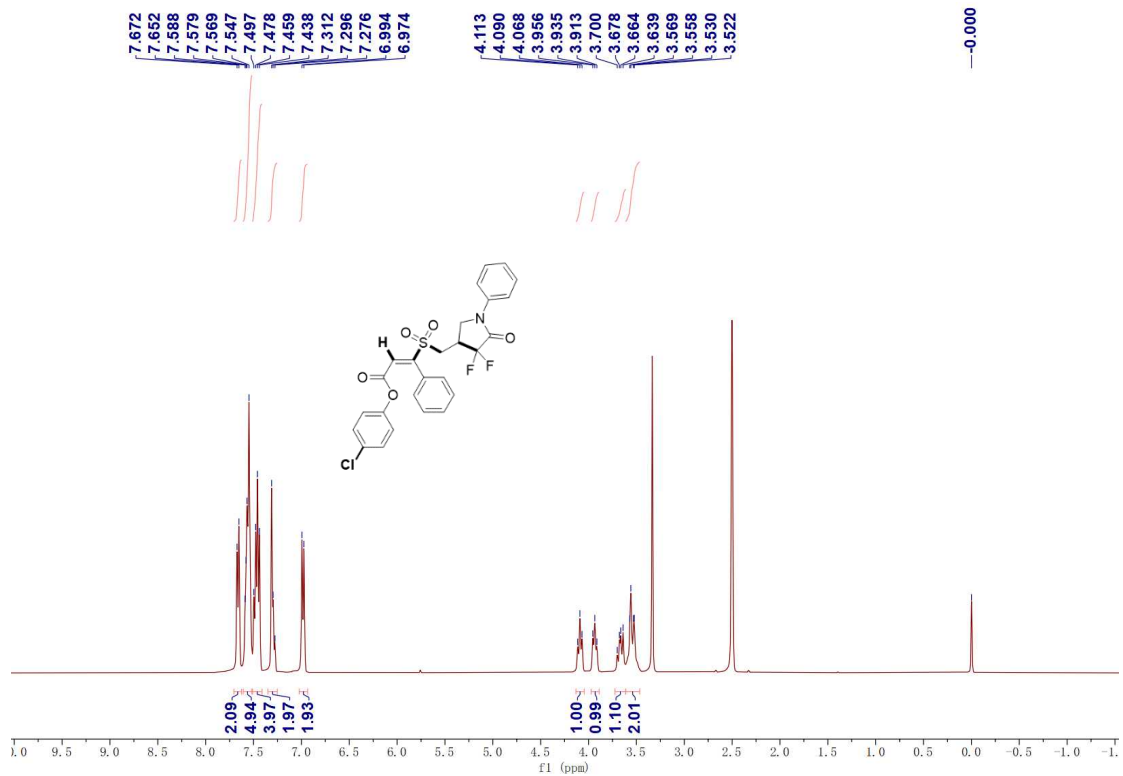



<sup>13</sup>C NMR-spectrum (101 MHz, DMSO-*d*<sub>6</sub>) of **3ba**

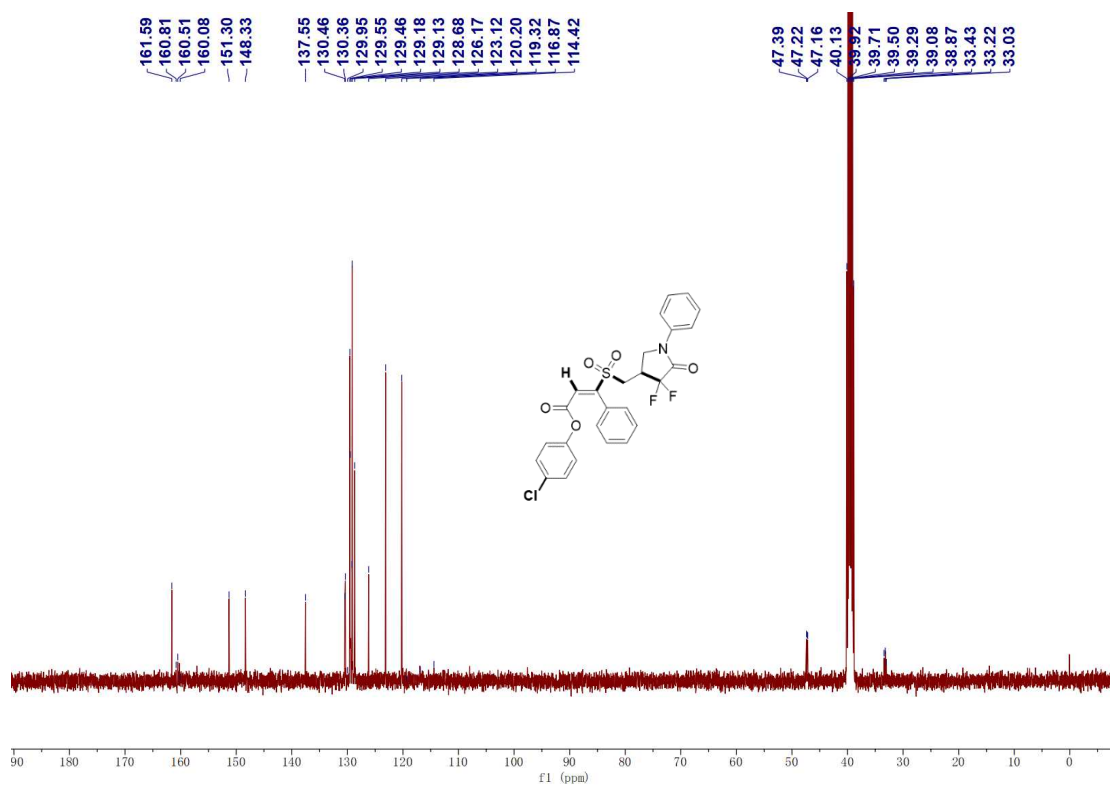

<sup>19</sup>F NMR-spectrum (376 MHz, DMSO-*d*<sub>6</sub>) of **3ba**

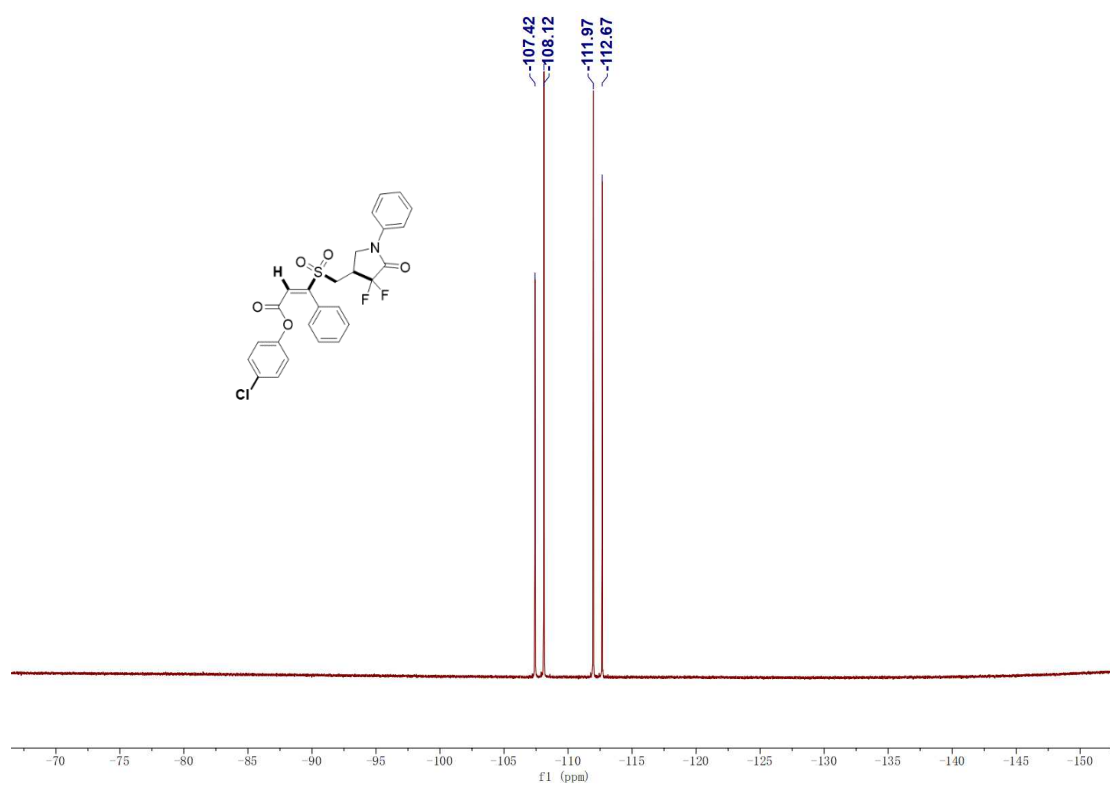

<sup>1</sup>H NMR-spectrum (400 MHz, DMSO-d<sub>6</sub>) of **3ca**

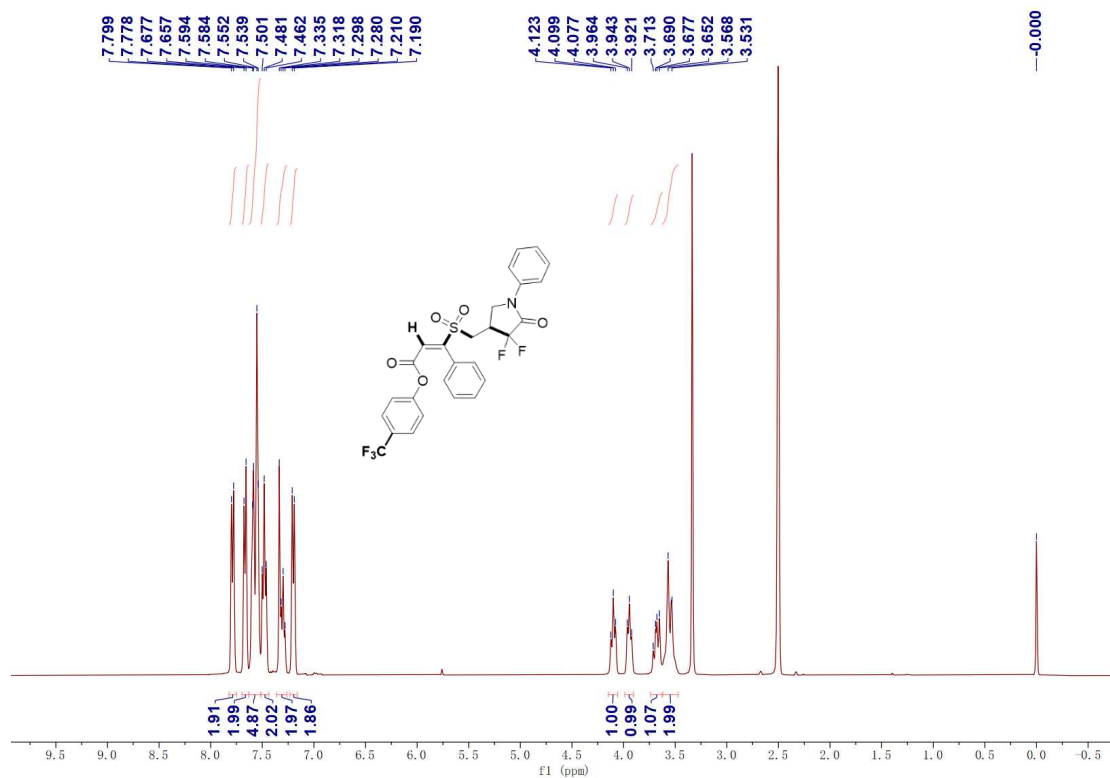

<sup>13</sup>C NMR-spectrum (101 MHz, DMSO-d<sub>6</sub>) of **3ca**

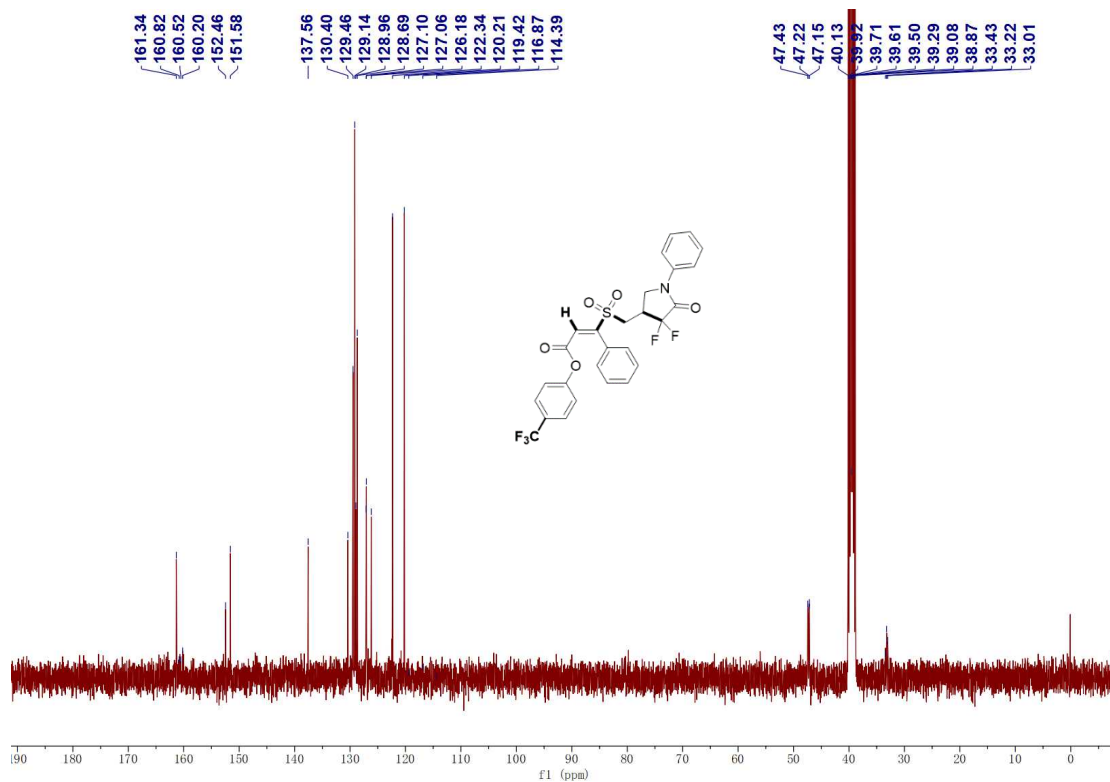

<sup>19</sup>F NMR-spectrum (376 MHz, DMSO-*d*<sub>6</sub>) of **3ca**

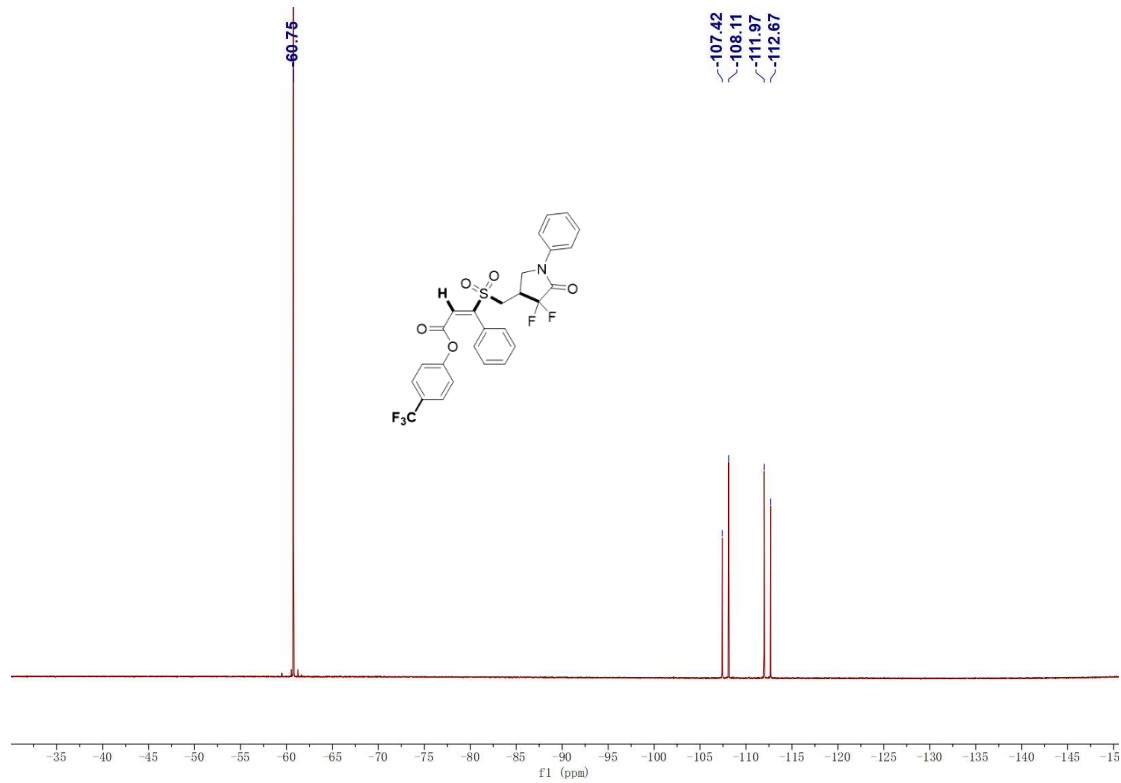

<sup>1</sup>H NMR-spectrum (400 MHz, DMSO-*d*<sub>6</sub>) of **3da**

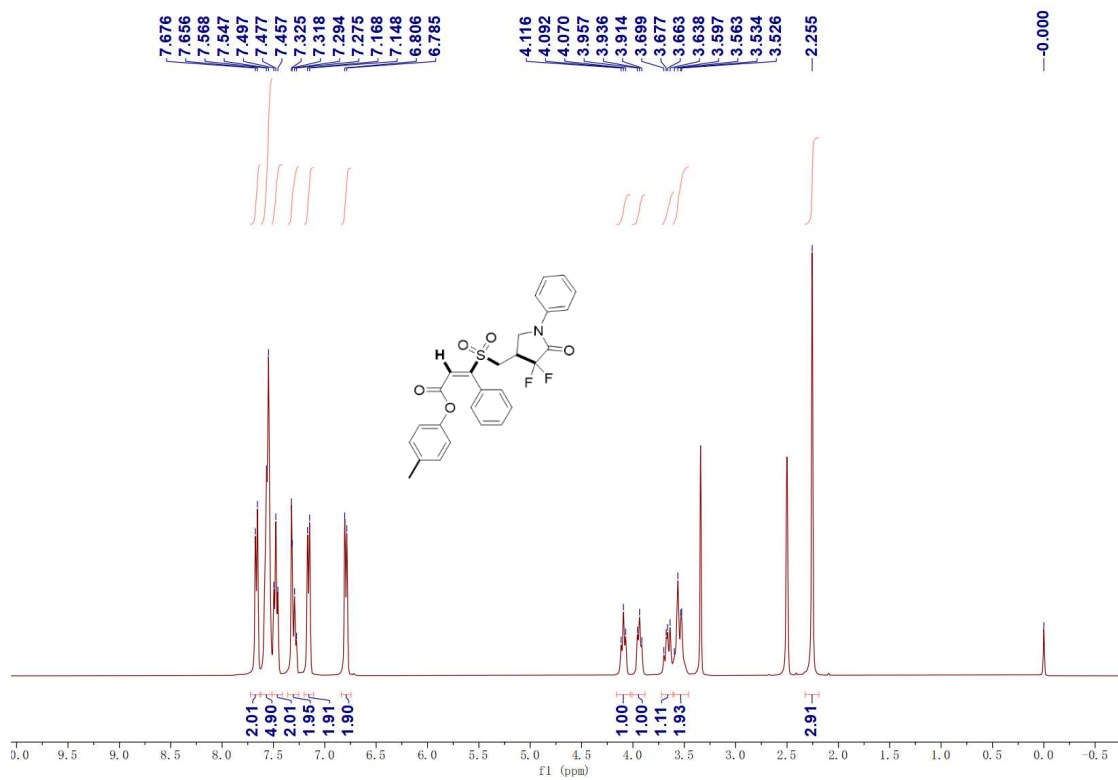

<sup>13</sup>C NMR-spectrum (101 MHz, DMSO-*d*<sub>6</sub>) of **3da**

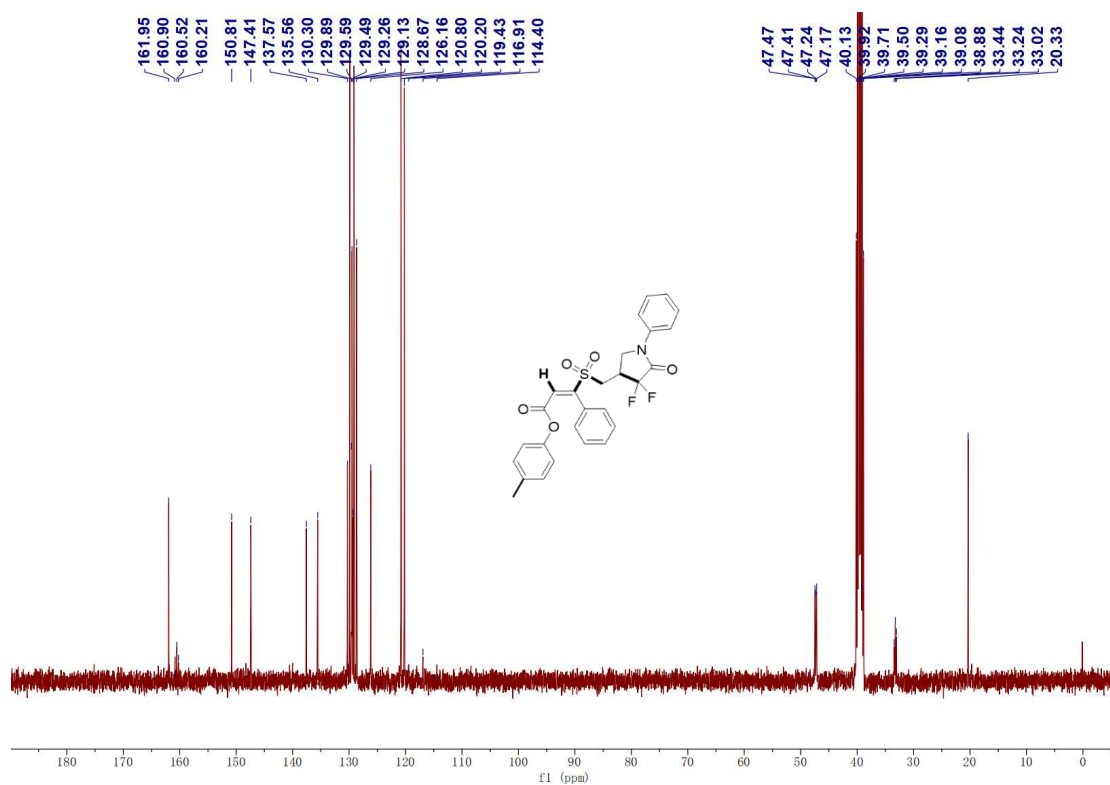

<sup>19</sup>F NMR-spectrum (376 MHz, DMSO-*d*<sub>6</sub>) of **3da**

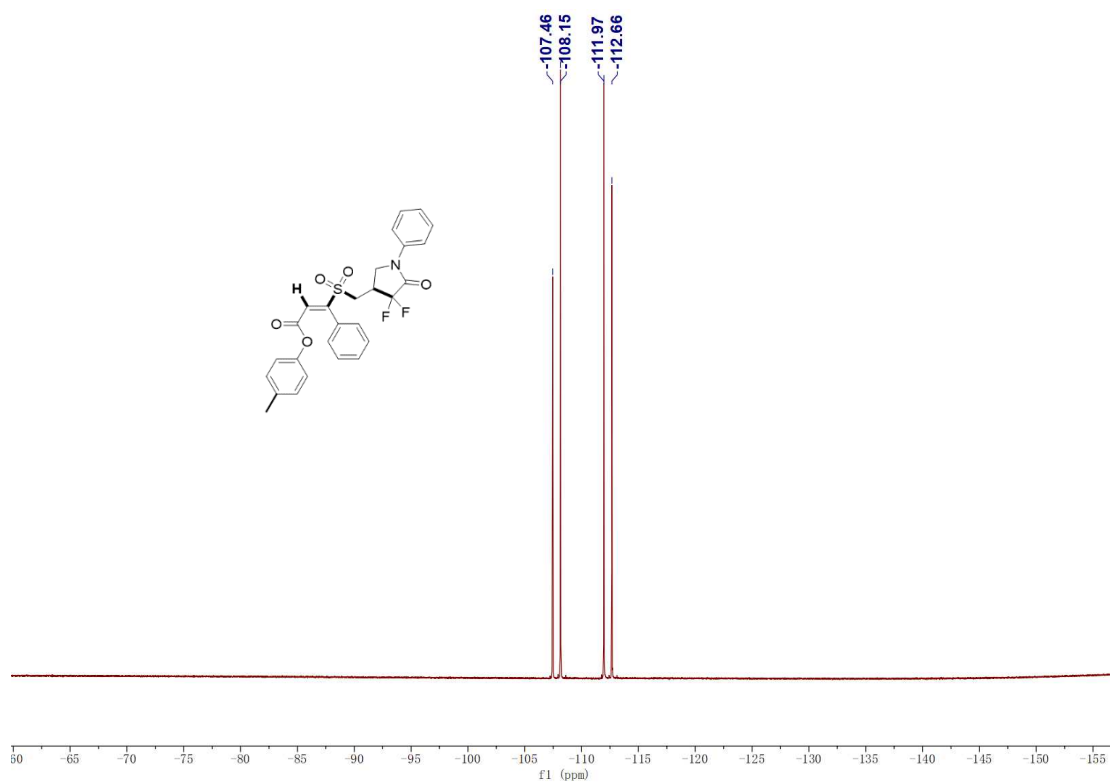

<sup>1</sup>H NMR-spectrum (400 MHz, DMSO-*d*<sub>6</sub>) of **3ea**

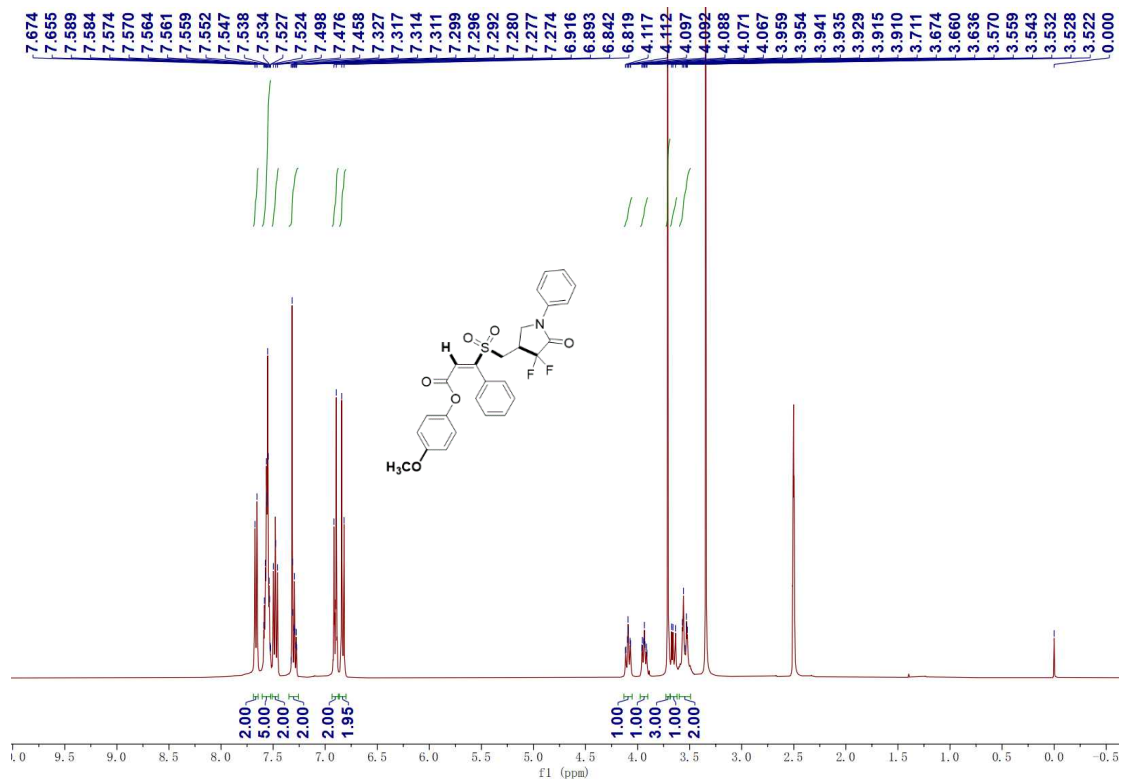

<sup>13</sup>C NMR-spectrum (101 MHz, DMSO-*d*<sub>6</sub>) of **3ea**

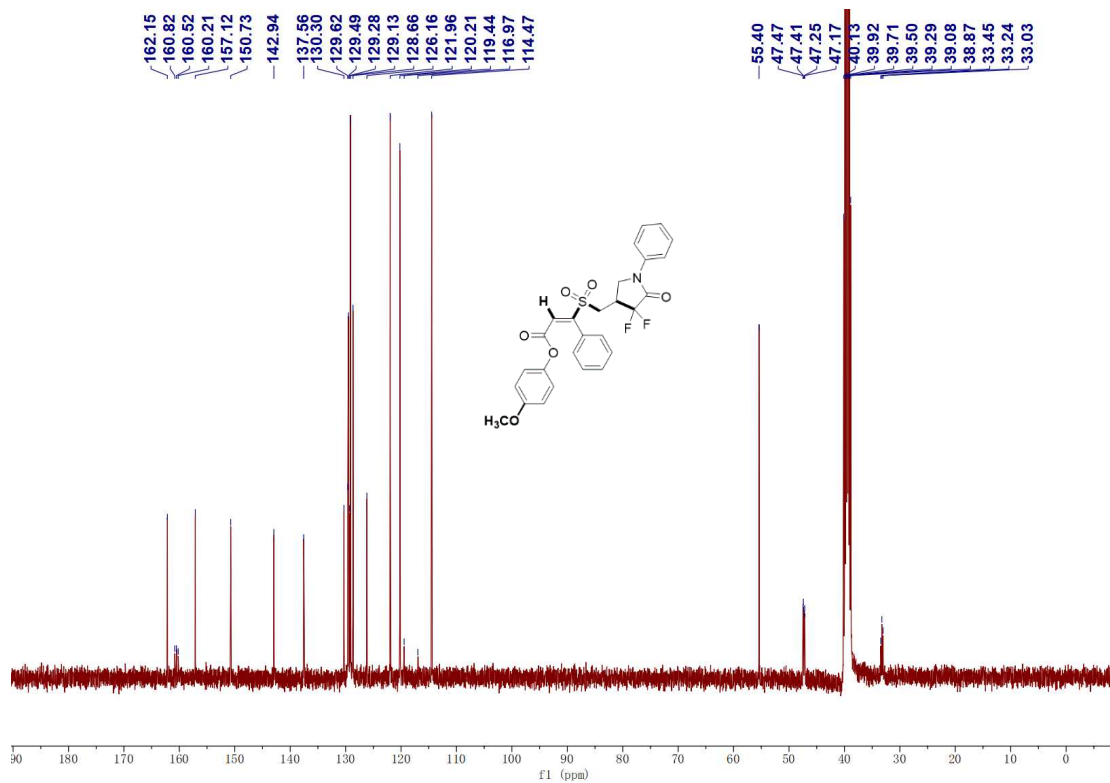

**<sup>19</sup>F NMR-spectrum (376 MHz, DMSO-*d*<sub>6</sub>) of 3ea**

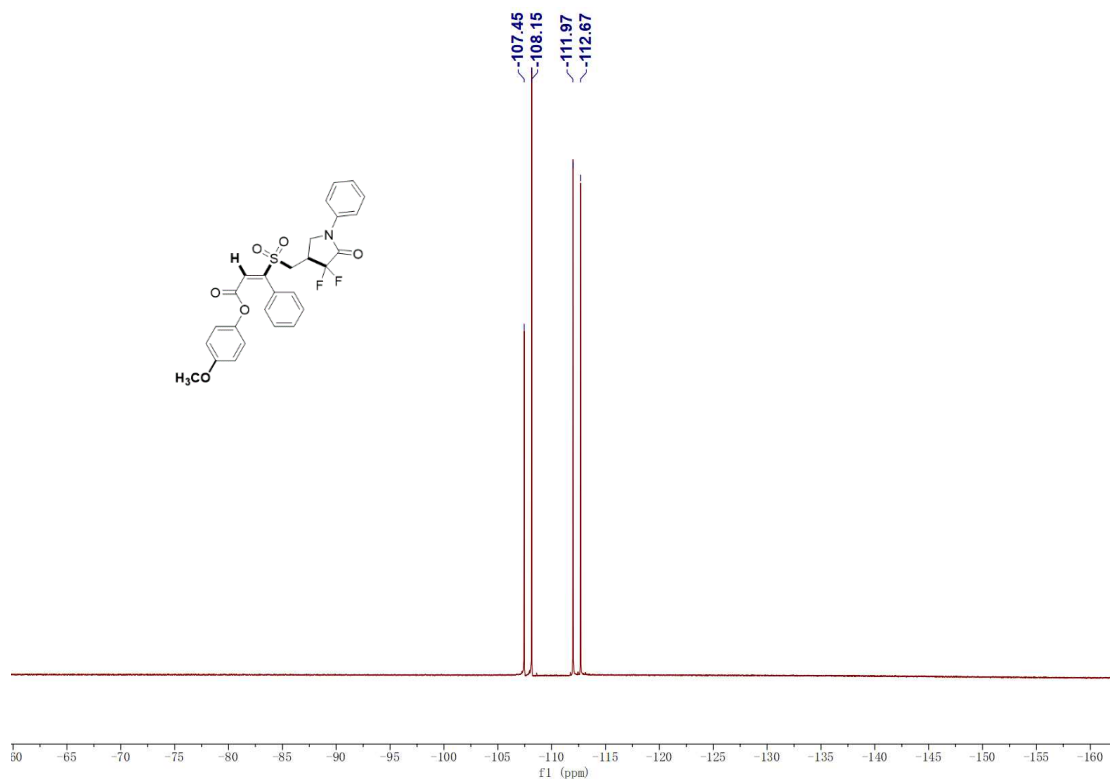

**<sup>1</sup>H NMR-spectrum (400 MHz, DMSO-*d*<sub>6</sub>) of 3fa**

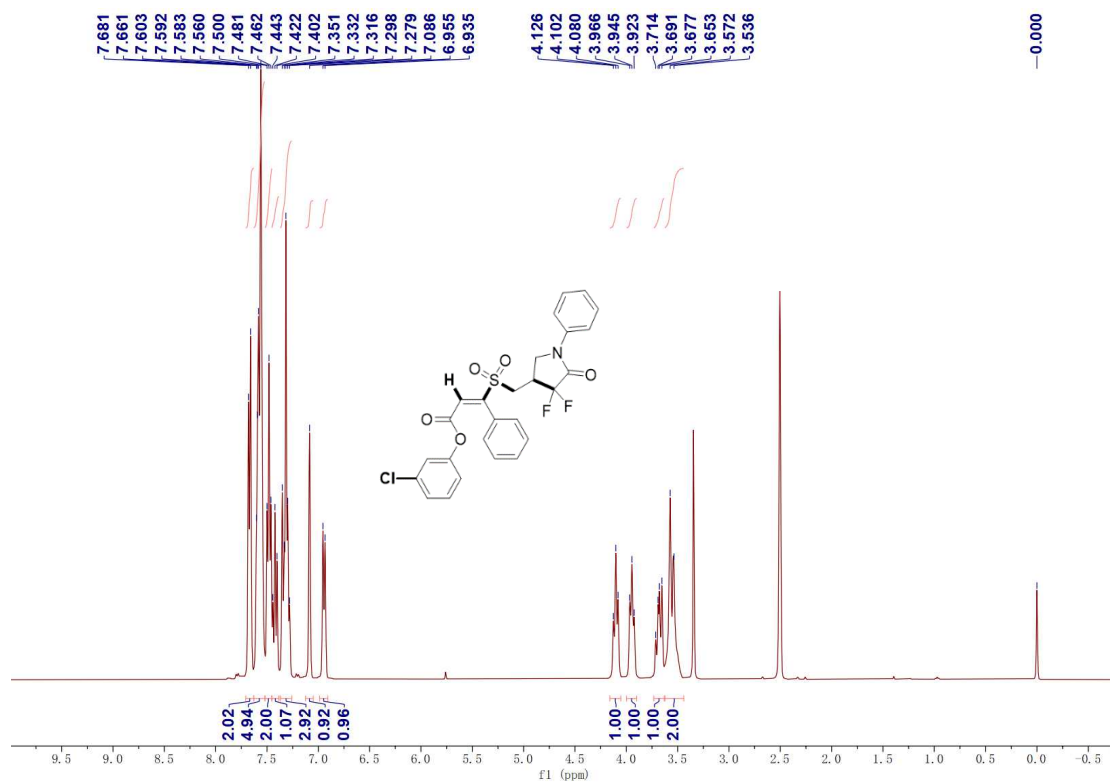

**<sup>13</sup>C NMR-spectrum (101 MHz, DMSO-*d*<sub>6</sub>) of 3fa**

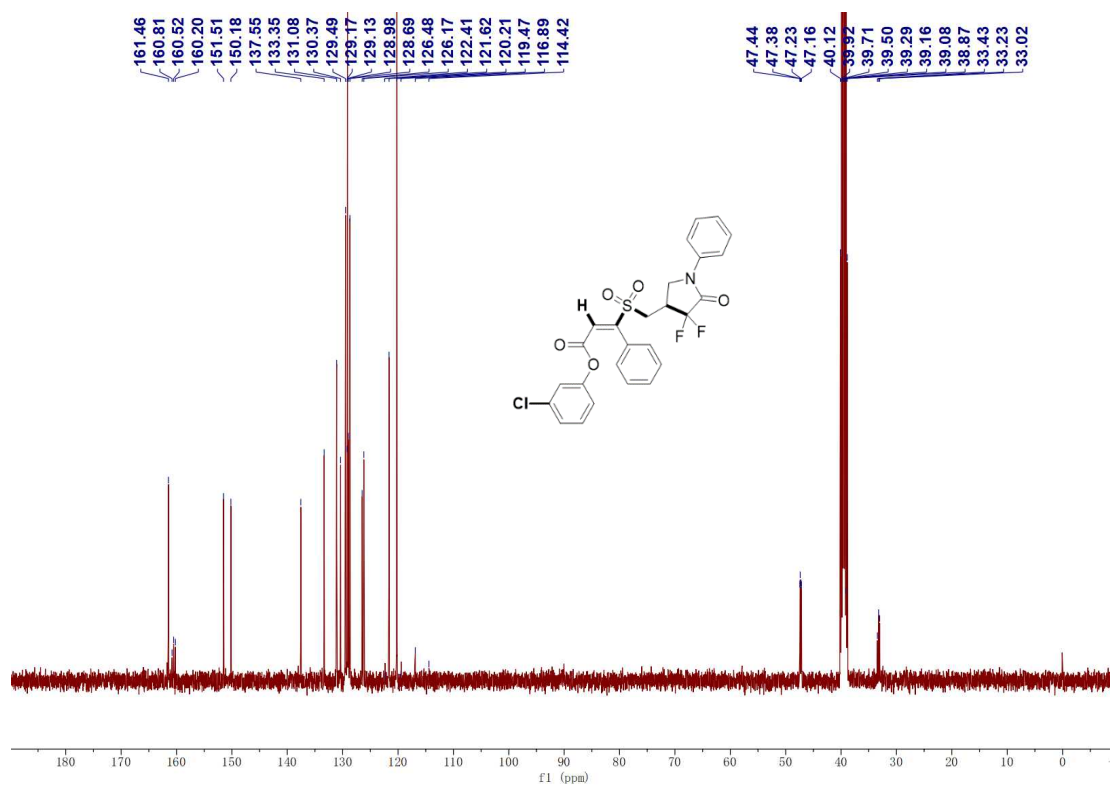

**<sup>19</sup>F NMR-spectrum (376 MHz, DMSO-*d*<sub>6</sub>) of 3fa**

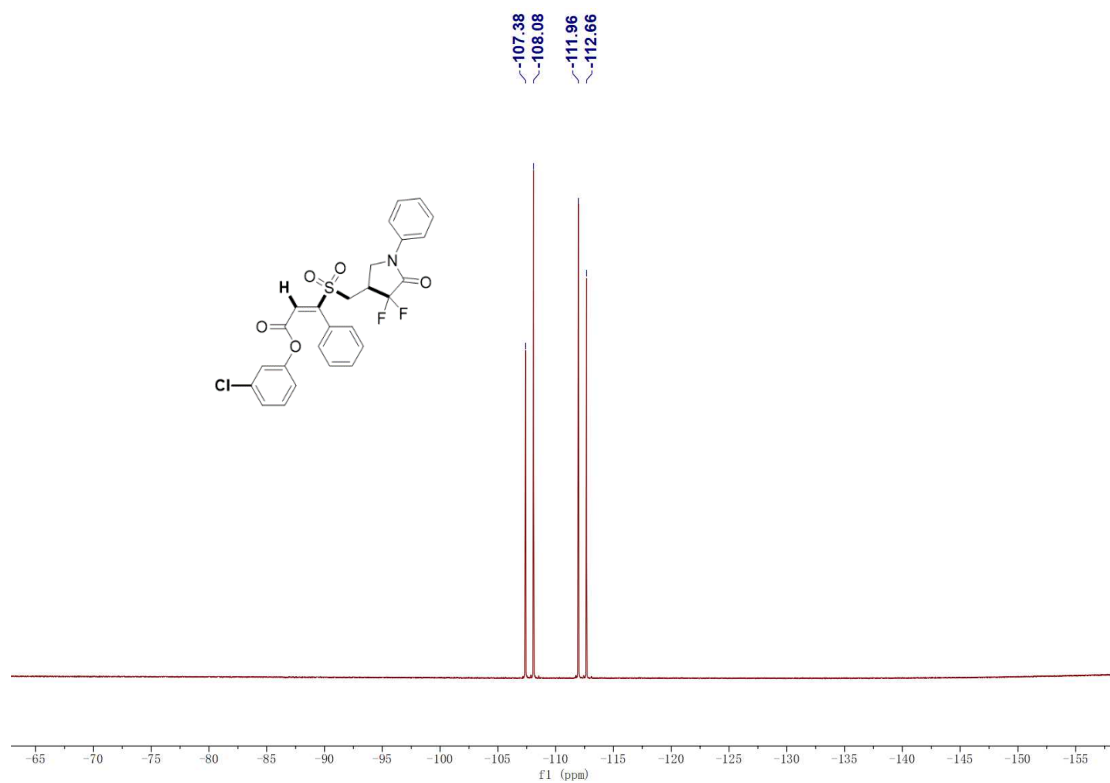

**<sup>1</sup>H NMR-spectrum (400 MHz, DMSO-*d*<sub>6</sub>) of 3ap**

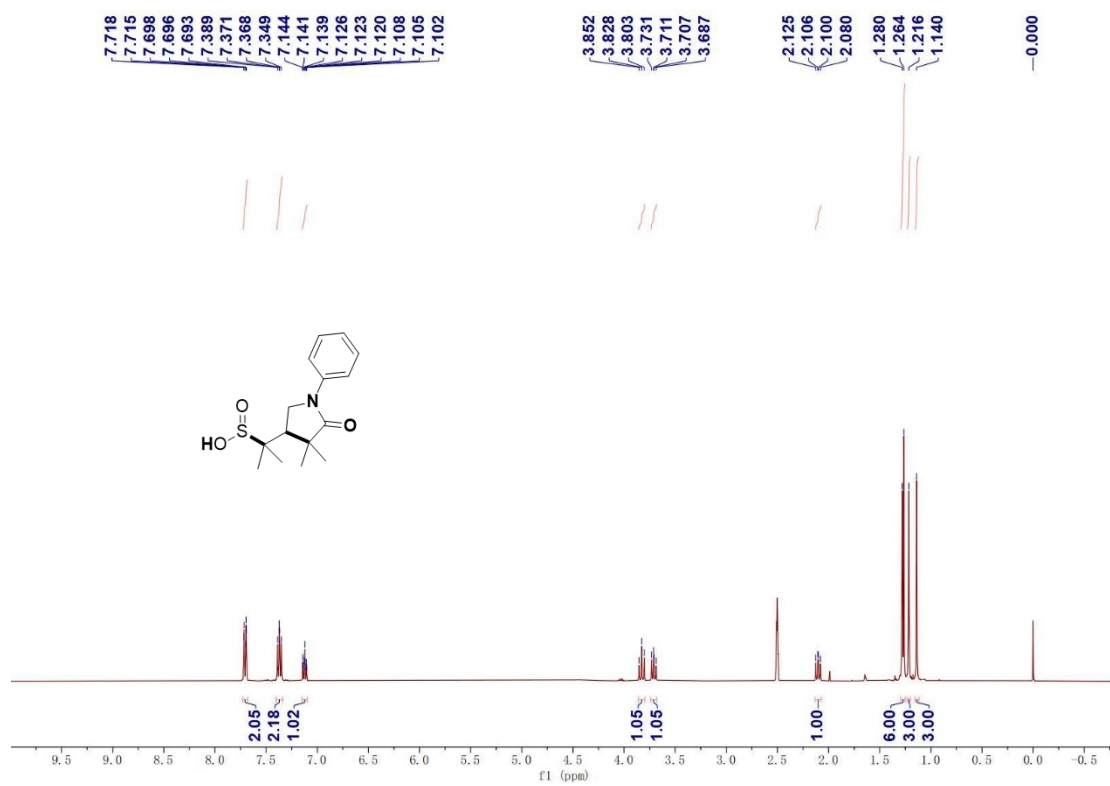

**<sup>13</sup>C NMR-spectrum (101 MHz, DMSO-*d*<sub>6</sub>) of 3ap**



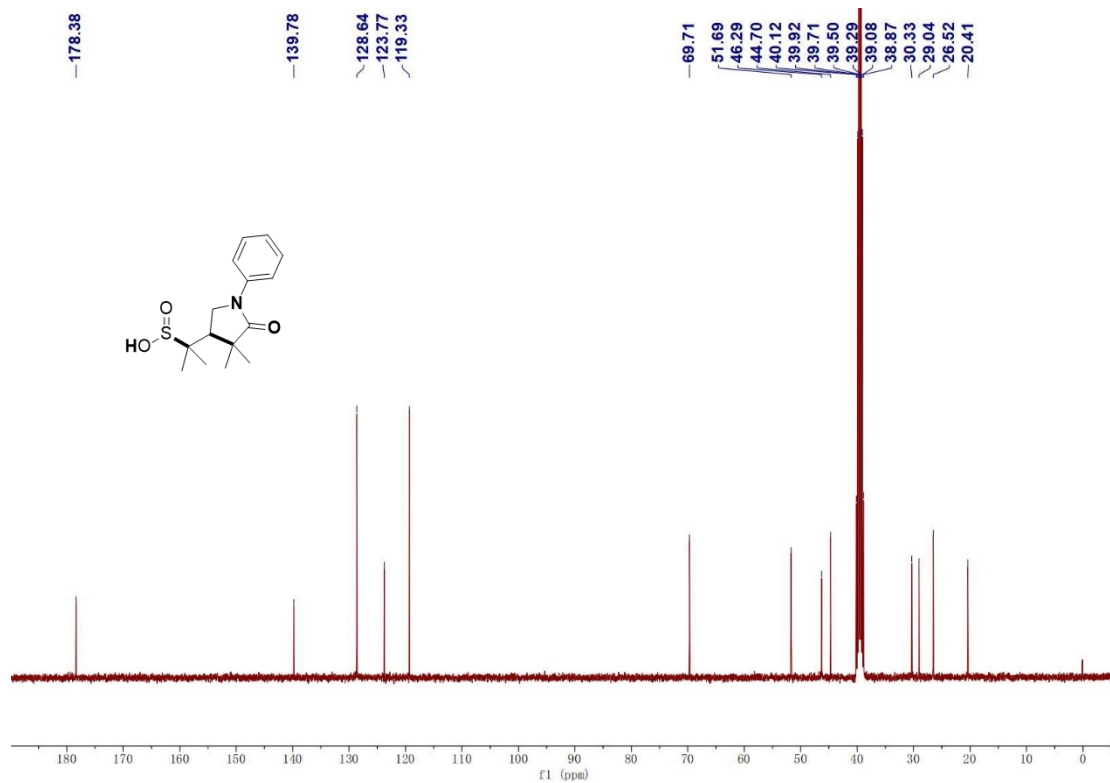

<sup>1</sup>H NMR-spectrum (400 MHz, DMSO-*d*<sub>6</sub>) of 3ma

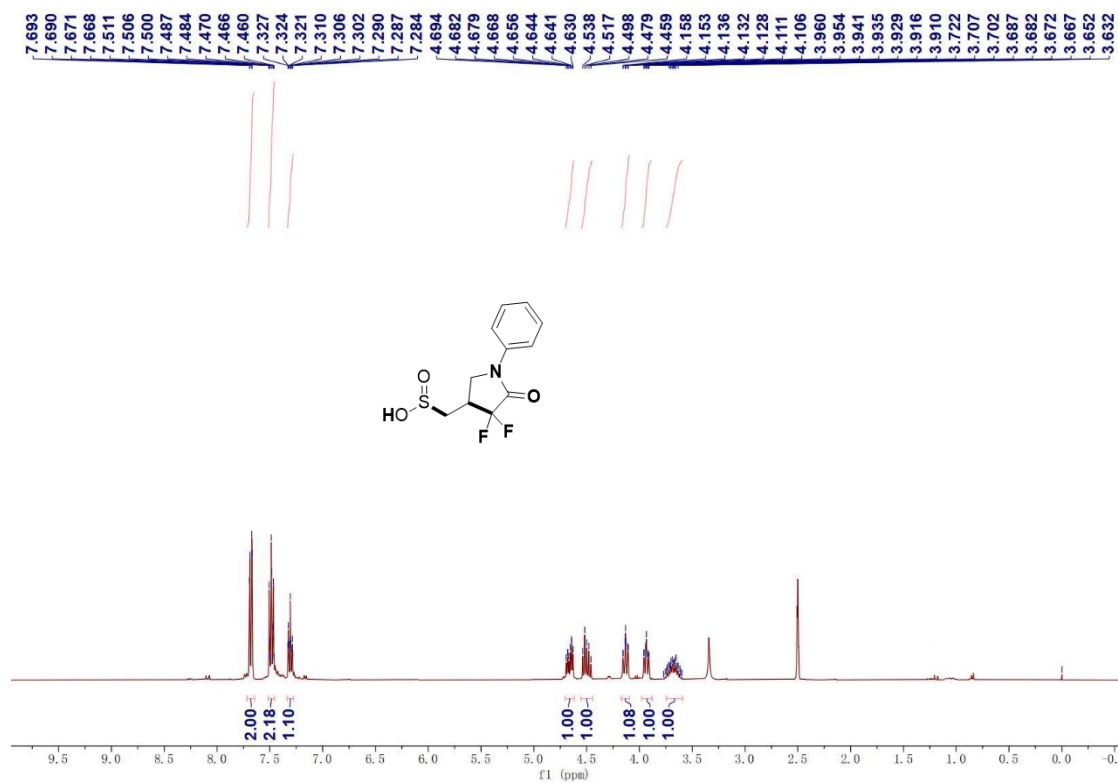

<sup>13</sup>C NMR-spectrum (101 MHz, DMSO-*d*<sub>6</sub>) of **3ma**

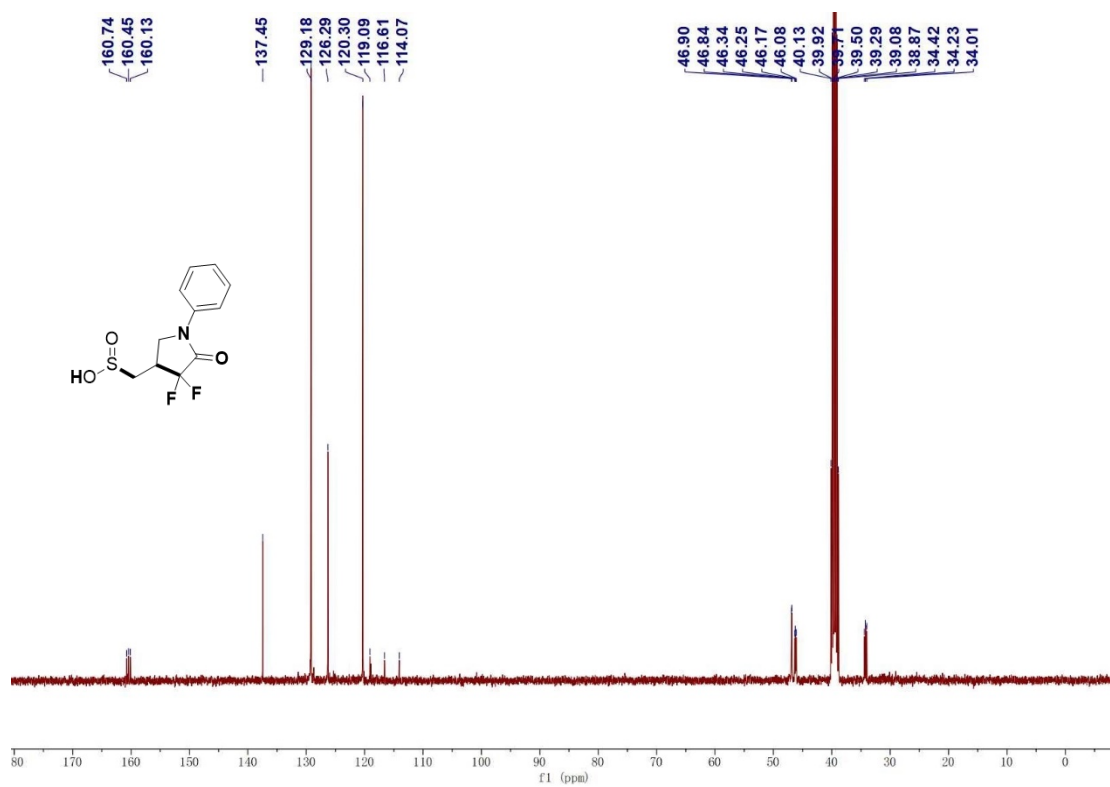

<sup>19</sup>F NMR-spectrum (376 MHz, DMSO-*d*<sub>6</sub>) of **3ma**

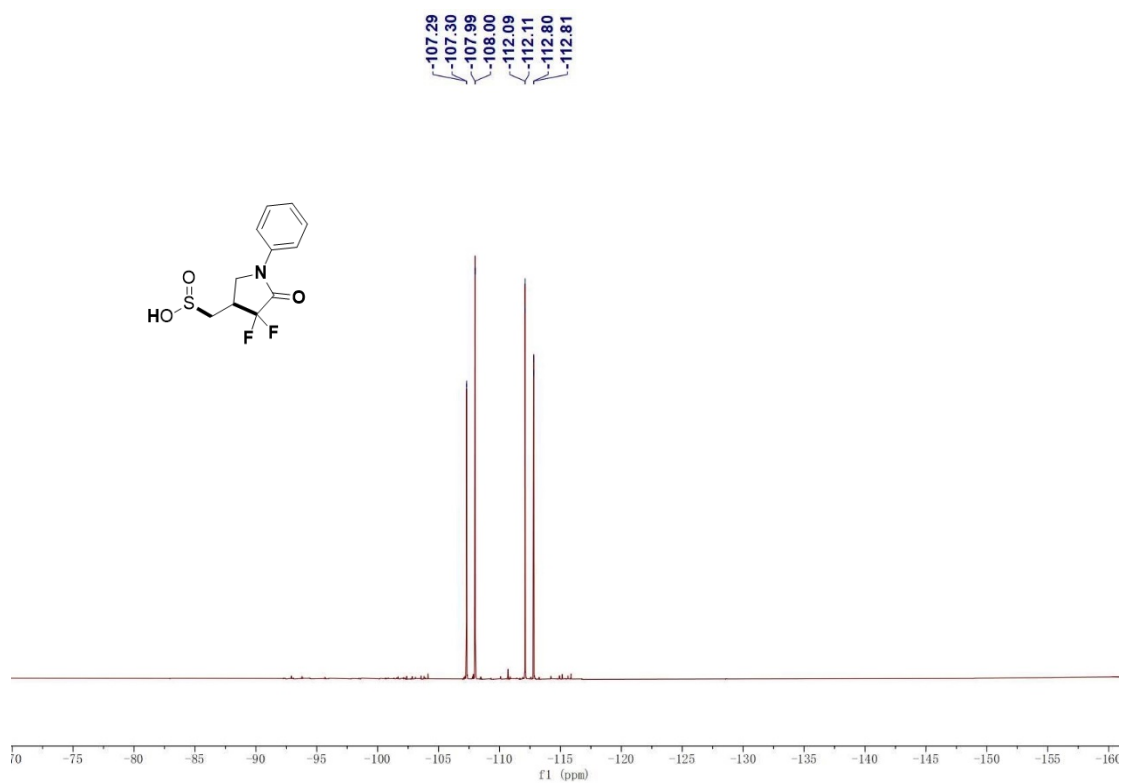

<sup>1</sup>H NMR-spectrum (400 MHz, DMSO-*d*<sub>6</sub>) of **4aa**

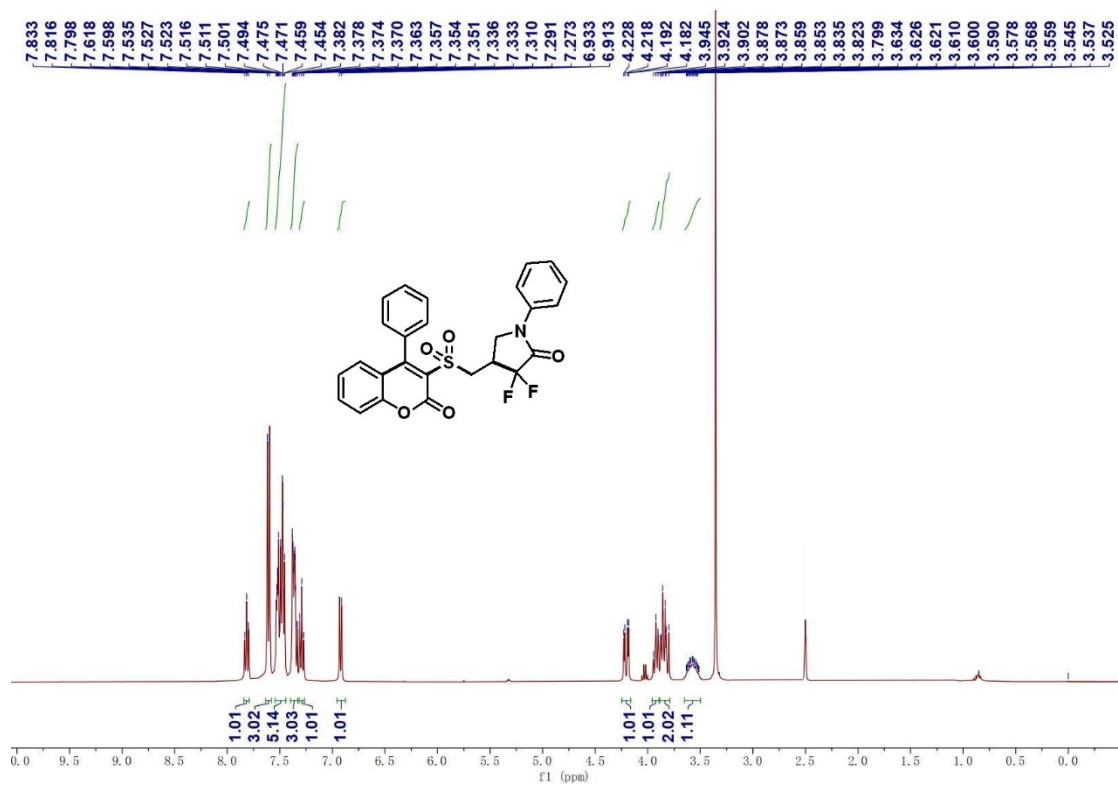

<sup>13</sup>C NMR-spectrum (101 MHz, DMSO-*d*<sub>6</sub>) of **4aa**

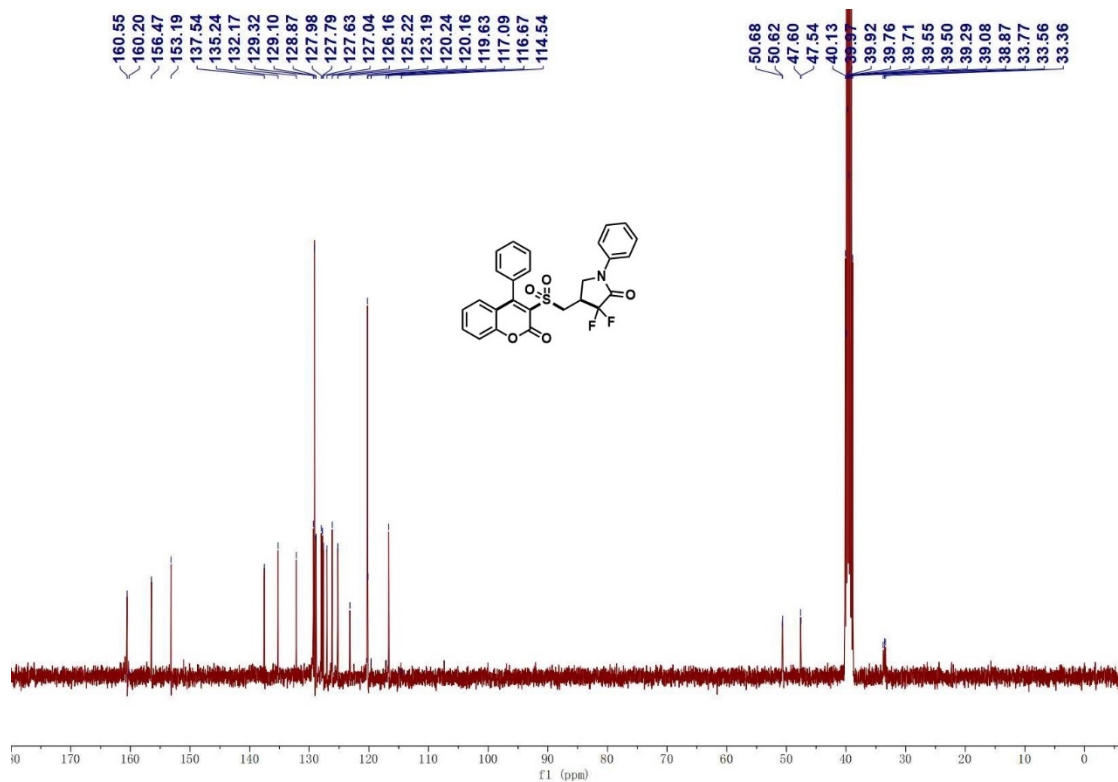

<sup>19</sup>F NMR-spectrum (376 MHz, DMSO-*d*<sub>6</sub>) of **4aa**

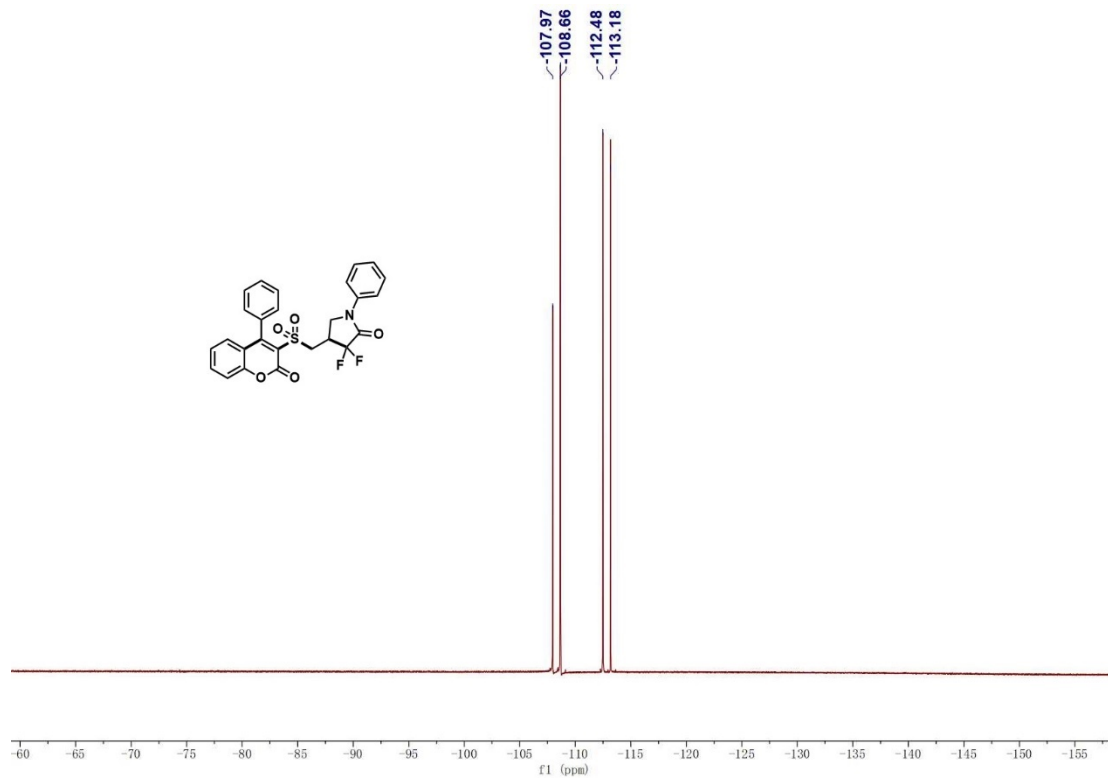

<sup>1</sup>H NMR-spectrum (400 MHz, DMSO-*d*<sub>6</sub>) of **4ab**

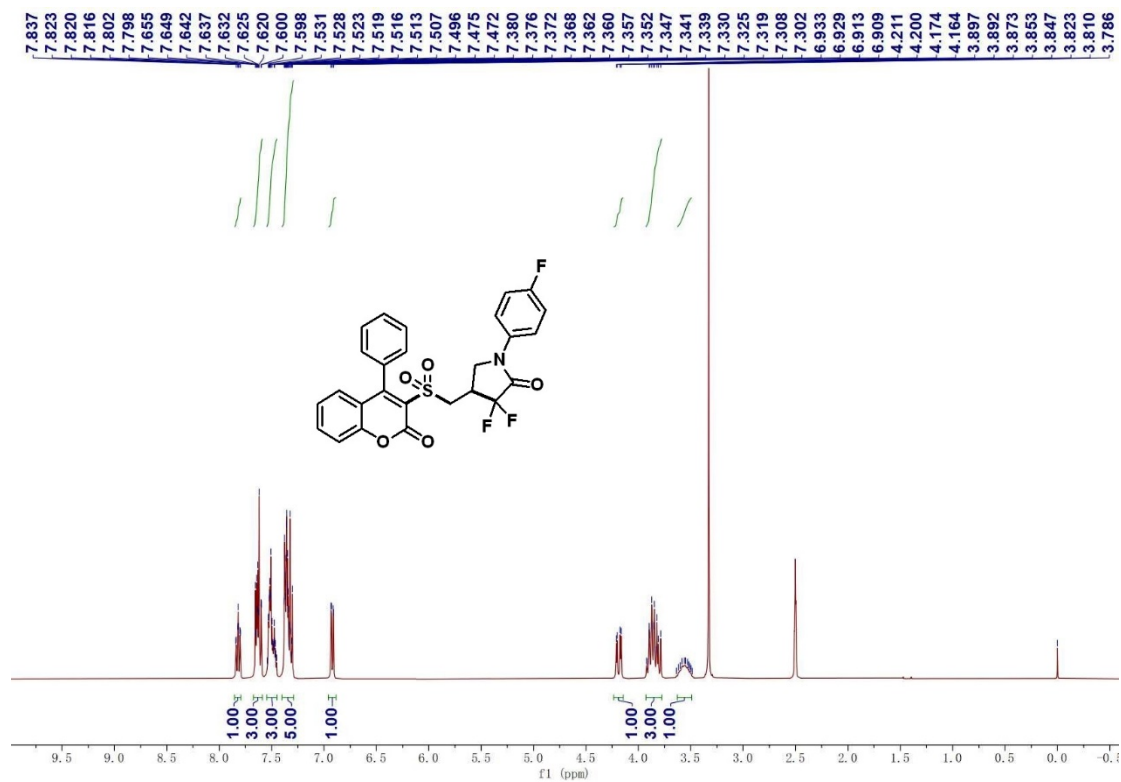

<sup>13</sup>C NMR-spectrum (101MHz, DMSO-*d*<sub>6</sub>) of **4ab**

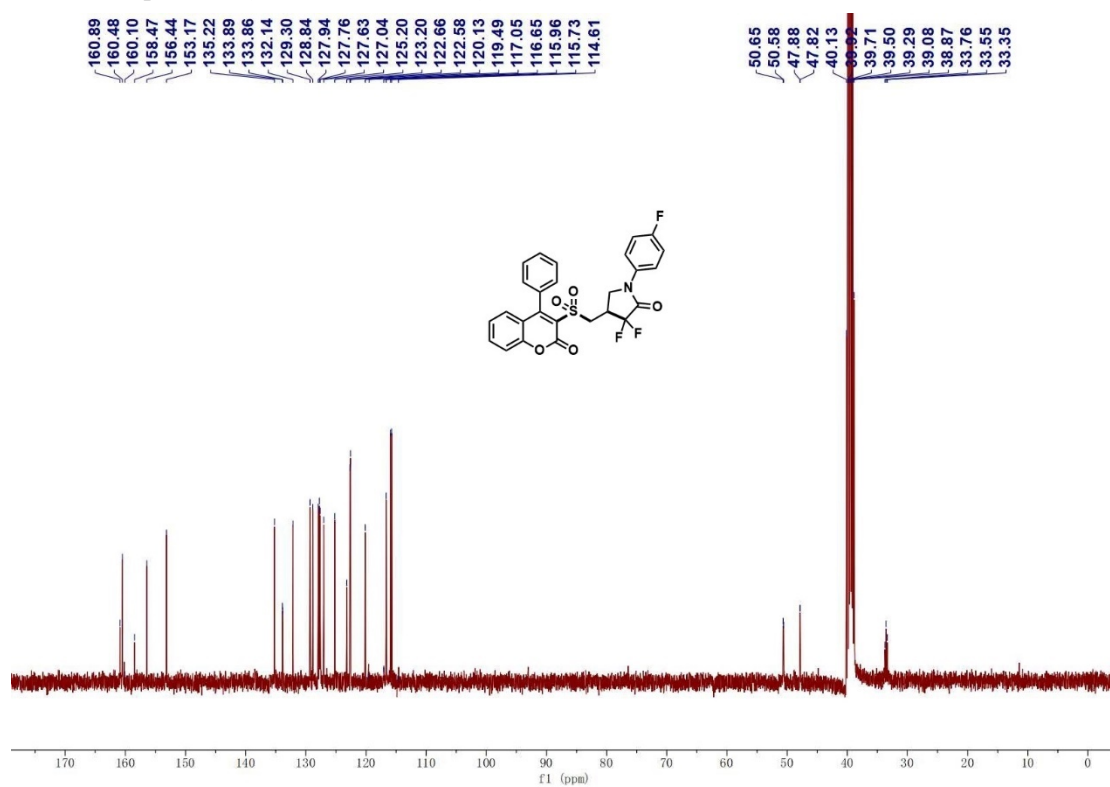

<sup>19</sup>F NMR-spectrum (376 MHz, DMSO-*d*<sub>6</sub>) of **4ab**

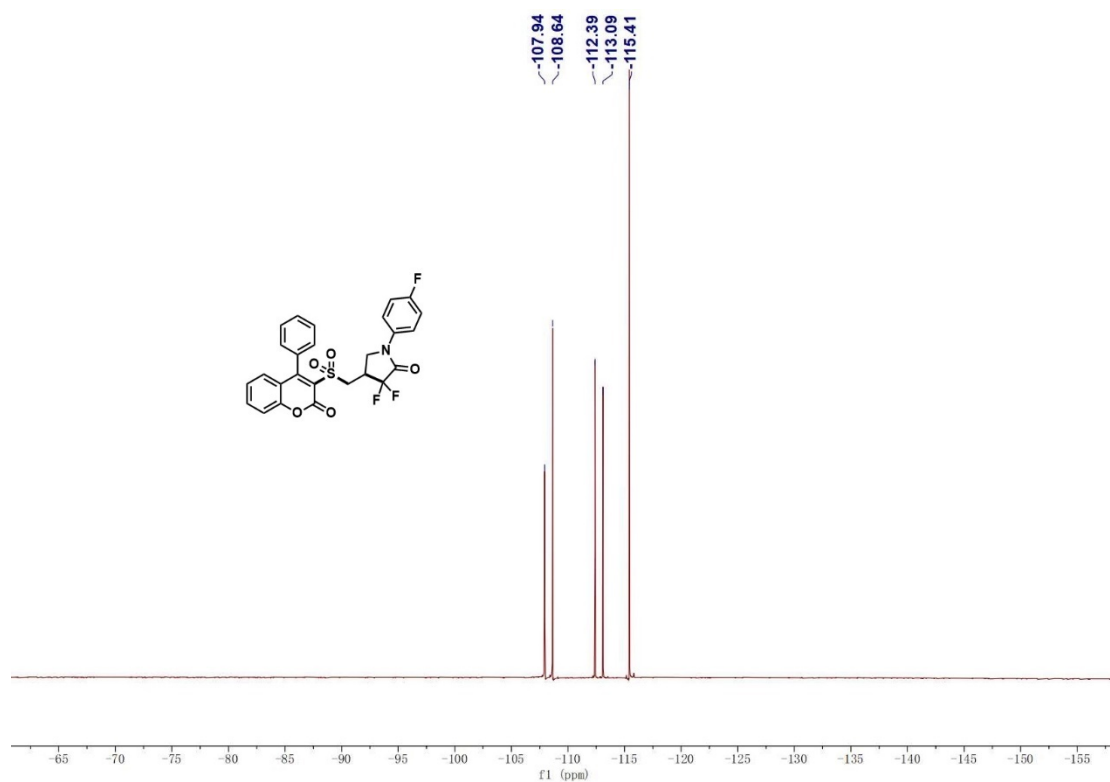

<sup>1</sup>H NMR-spectrum (400 MHz, DMSO-d<sub>6</sub>) of **4ac**

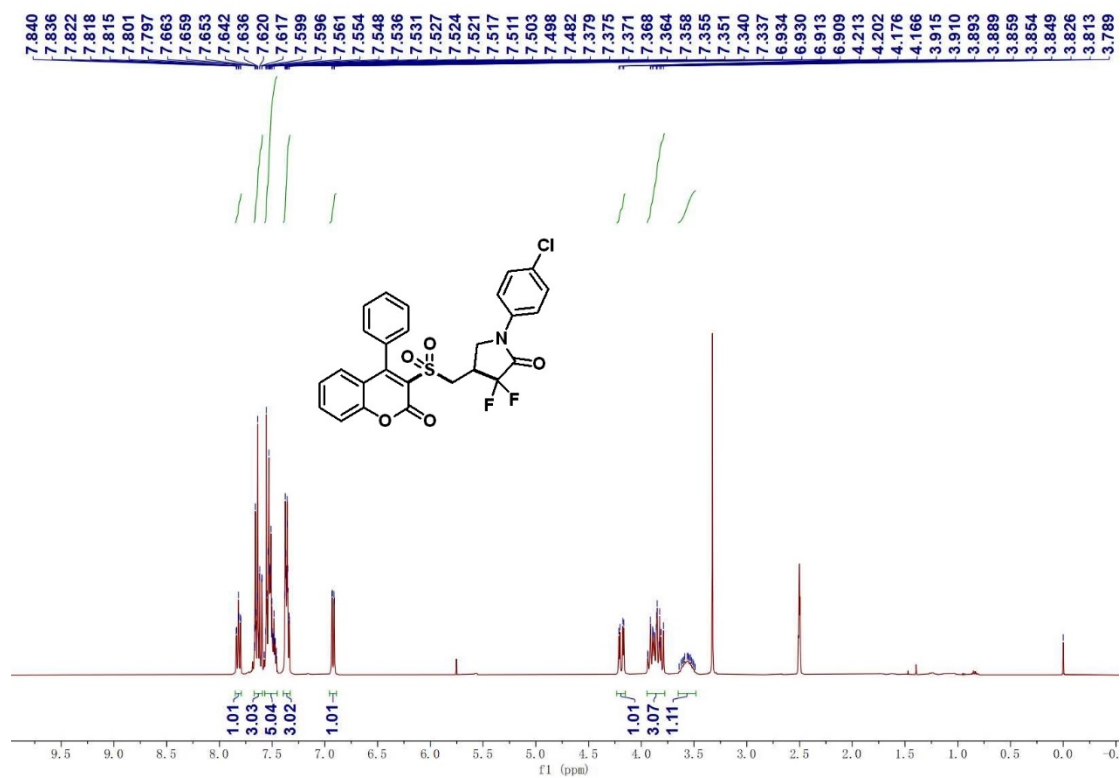

<sup>13</sup>C NMR-spectrum (101 MHz, DMSO-d<sub>6</sub>) of **4ac**

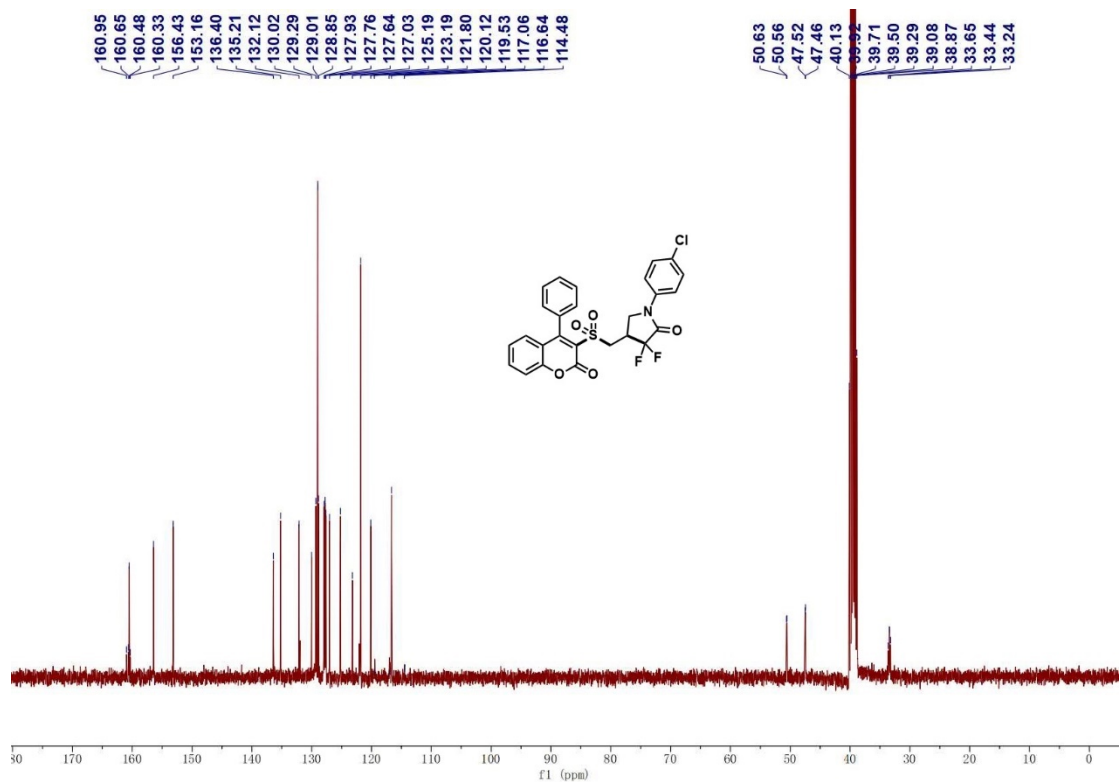

<sup>19</sup>F NMR-spectrum (376 MHz, DMSO-*d*<sub>6</sub>) of **4ac**

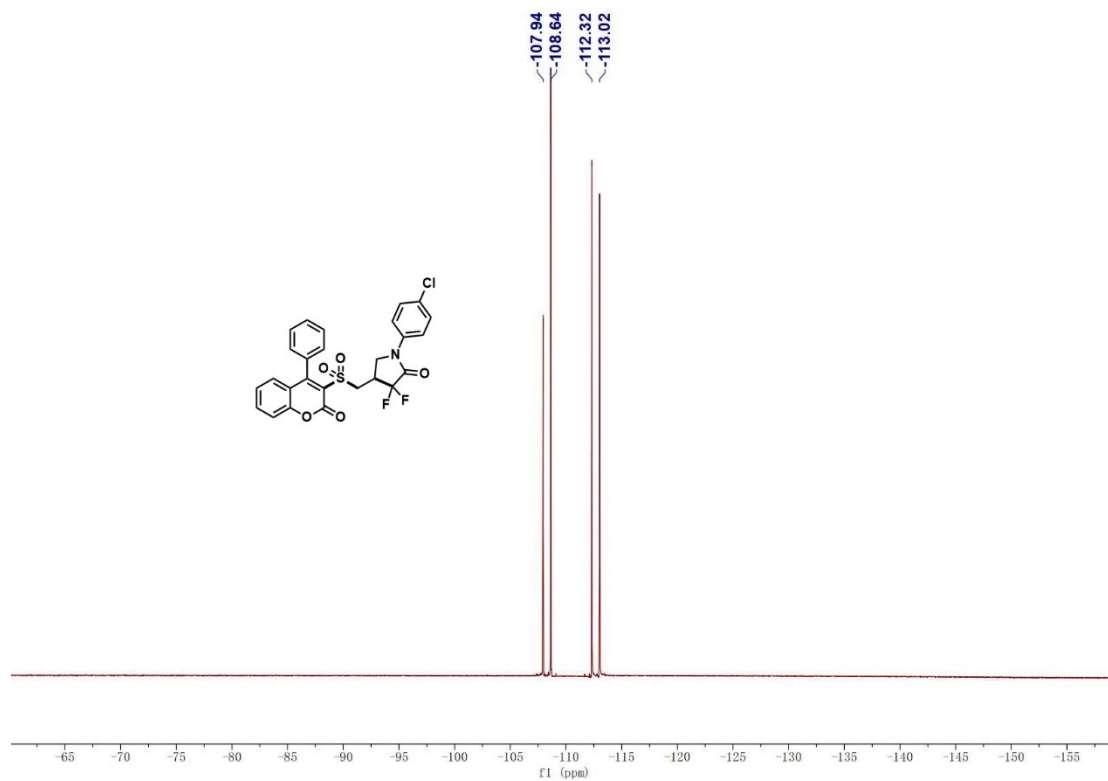

<sup>1</sup>H NMR-spectrum (400 MHz, DMSO-*d*<sub>6</sub>) of **4ad**

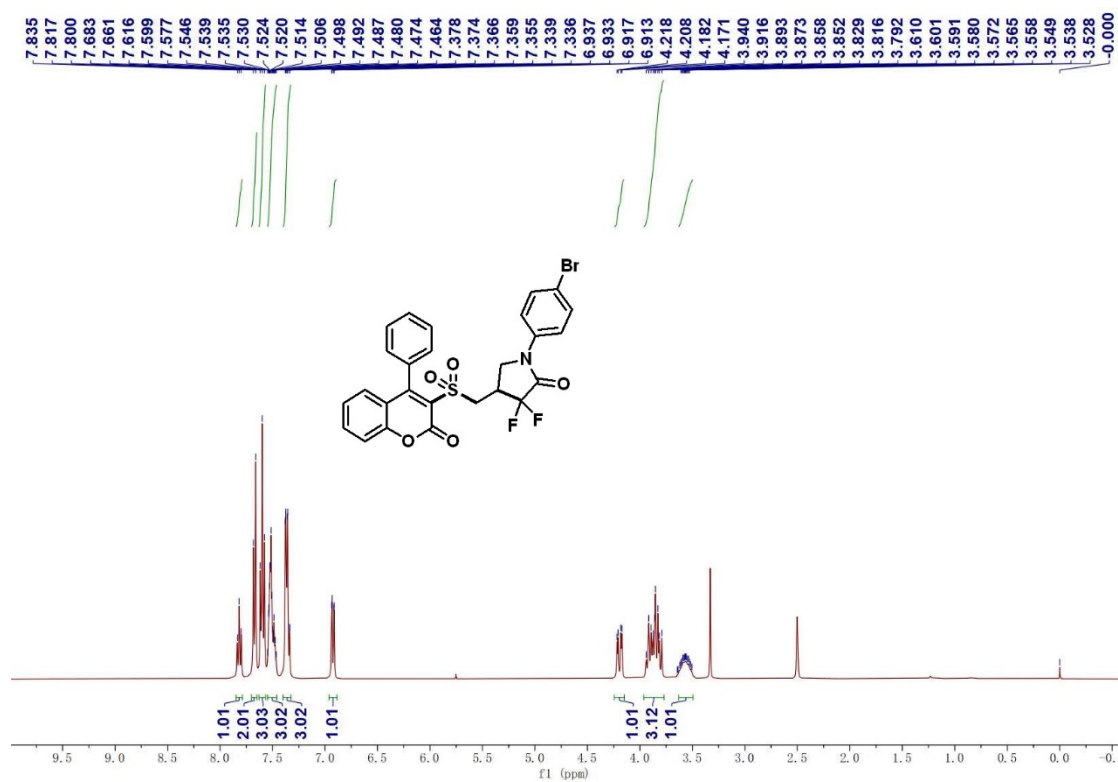

<sup>13</sup>C NMR-spectrum (101 MHz, DMSO-*d*<sub>6</sub>) of **4ad**

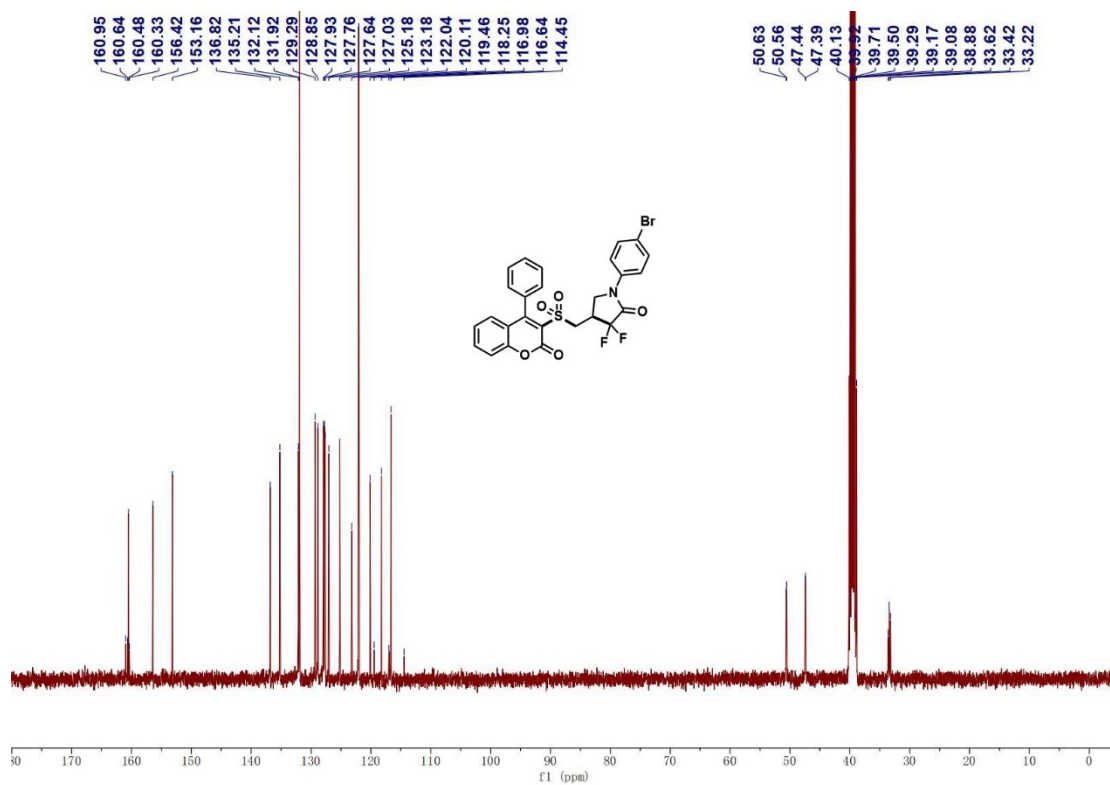

<sup>19</sup>F NMR-spectrum (376 MHz, DMSO-*d*<sub>6</sub>) of **4ad**

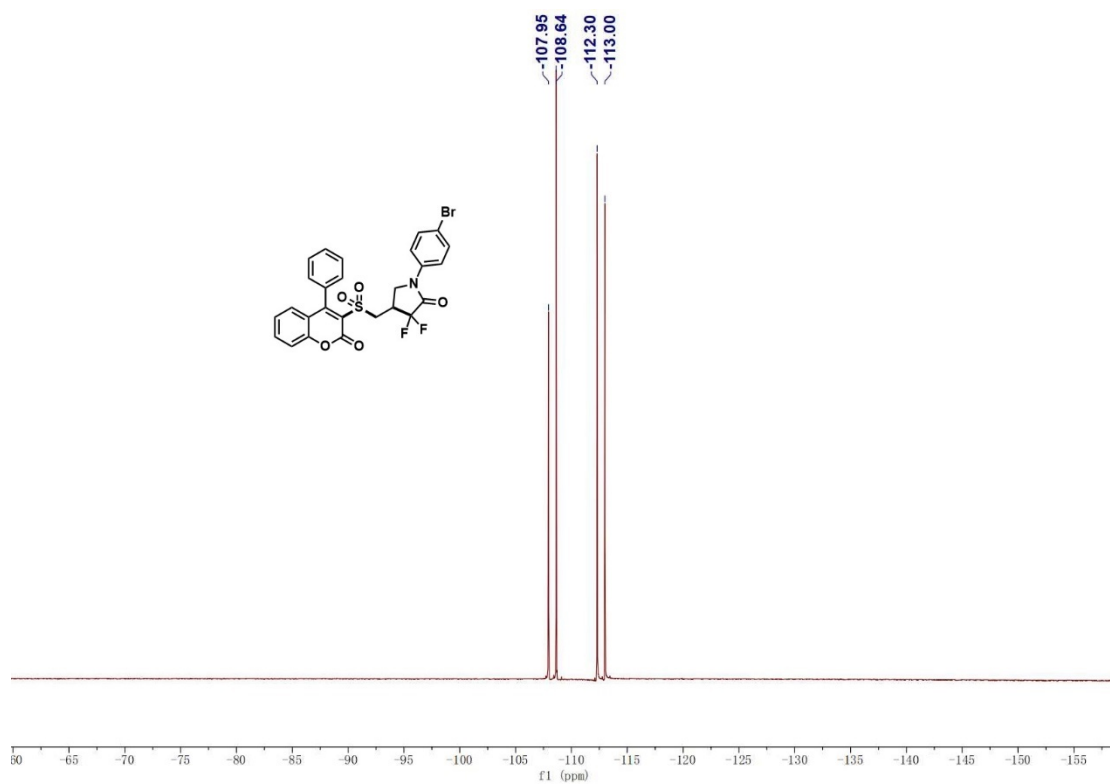



$^1\text{H}$  NMR-spectrum (400 MHz,  $\text{DMSO-}d_6$ ) of **4ae**

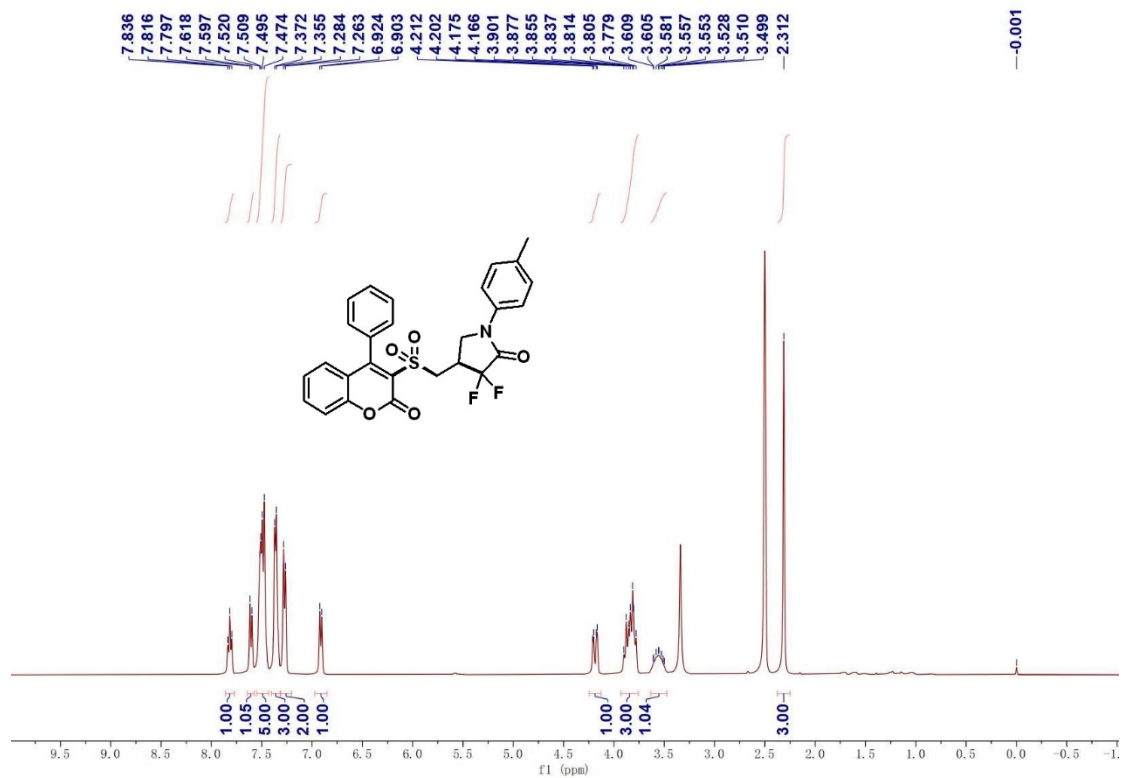

$^{13}\text{C}$  NMR-spectrum (101 MHz,  $\text{DMSO-}d_6$ ) of **4ae**

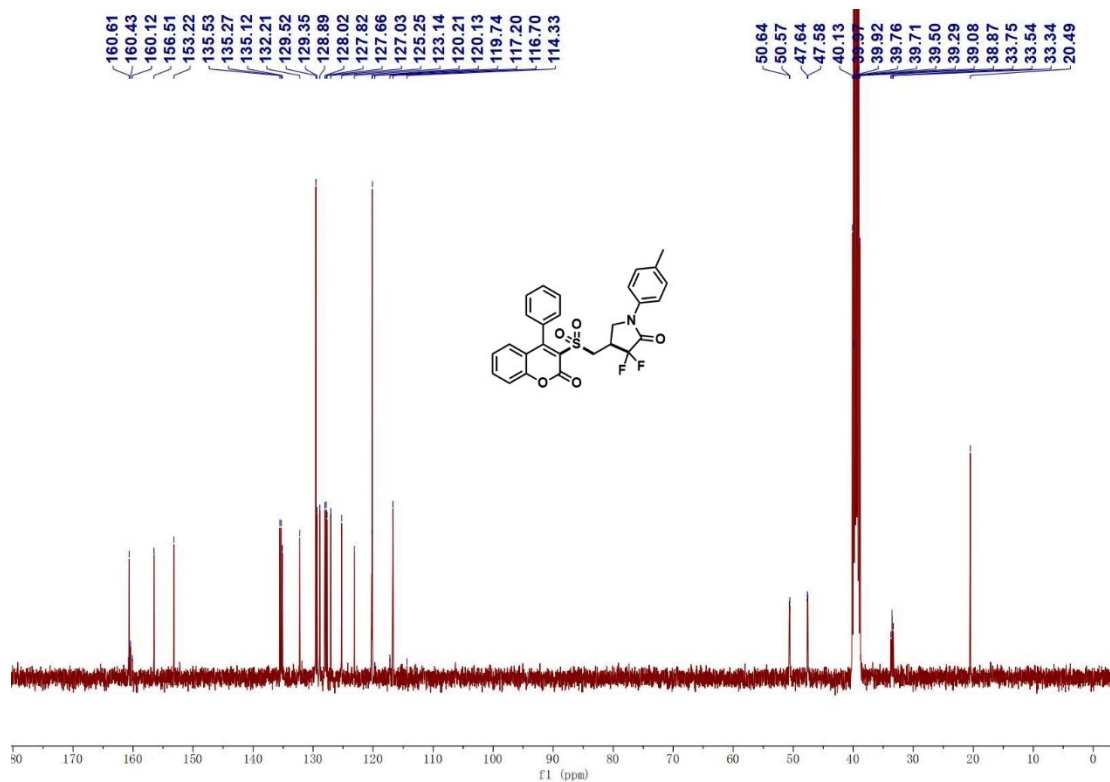

<sup>19</sup>F NMR-spectrum (376 MHz, DMSO-*d*<sub>6</sub>) of **4ae**

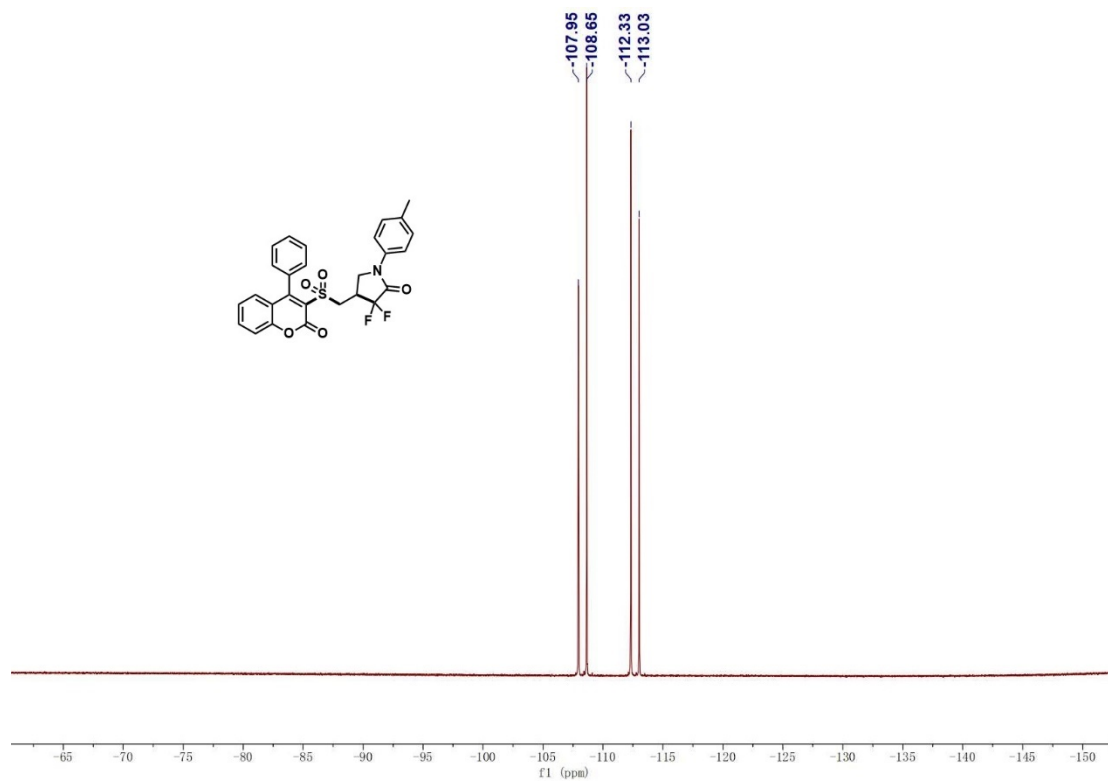

<sup>1</sup>H NMR-spectrum (400 MHz, DMSO-*d*<sub>6</sub>) of **4af**

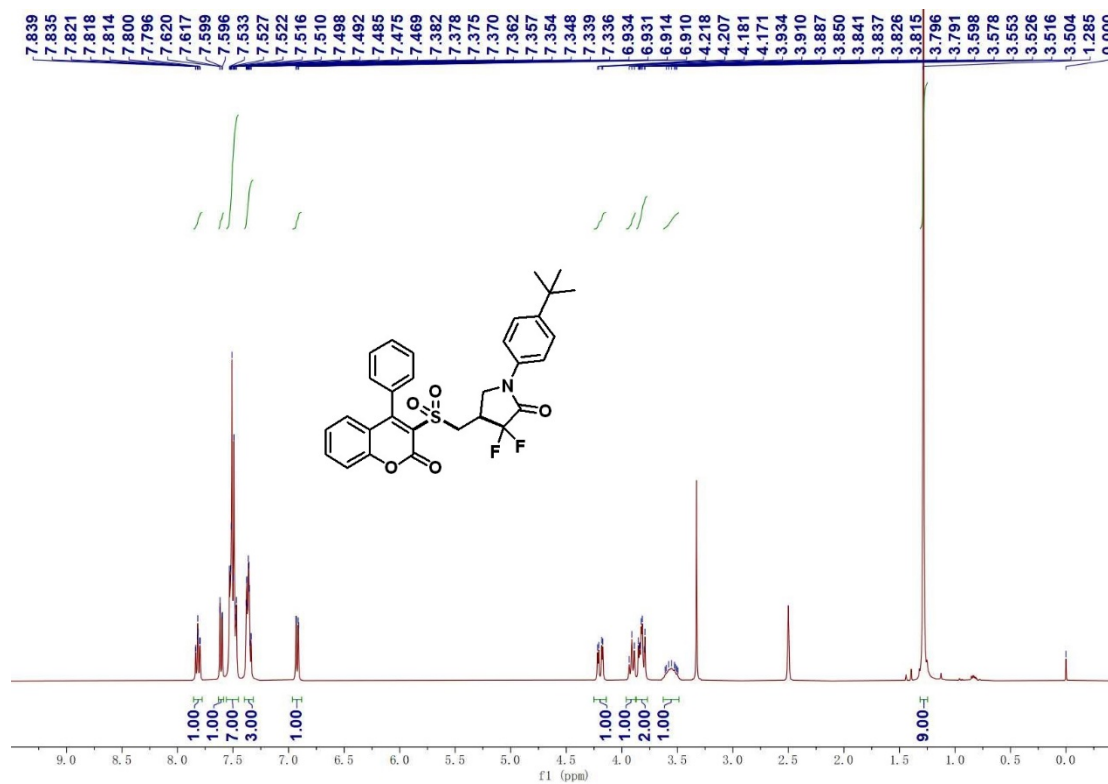

<sup>13</sup>C NMR-spectrum (101 MHz, DMSO-*d*<sub>6</sub>) of **4af**

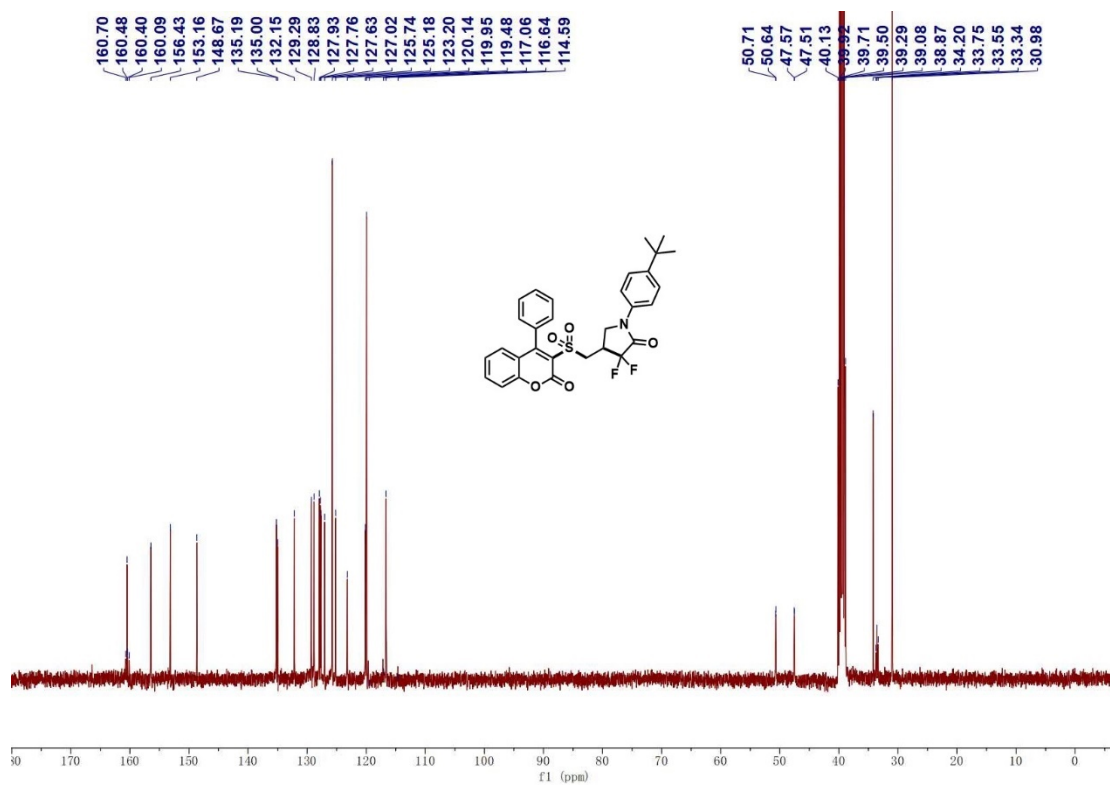

<sup>19</sup>F NMR-spectrum (376 MHz, DMSO-*d*<sub>6</sub>) of **4af**

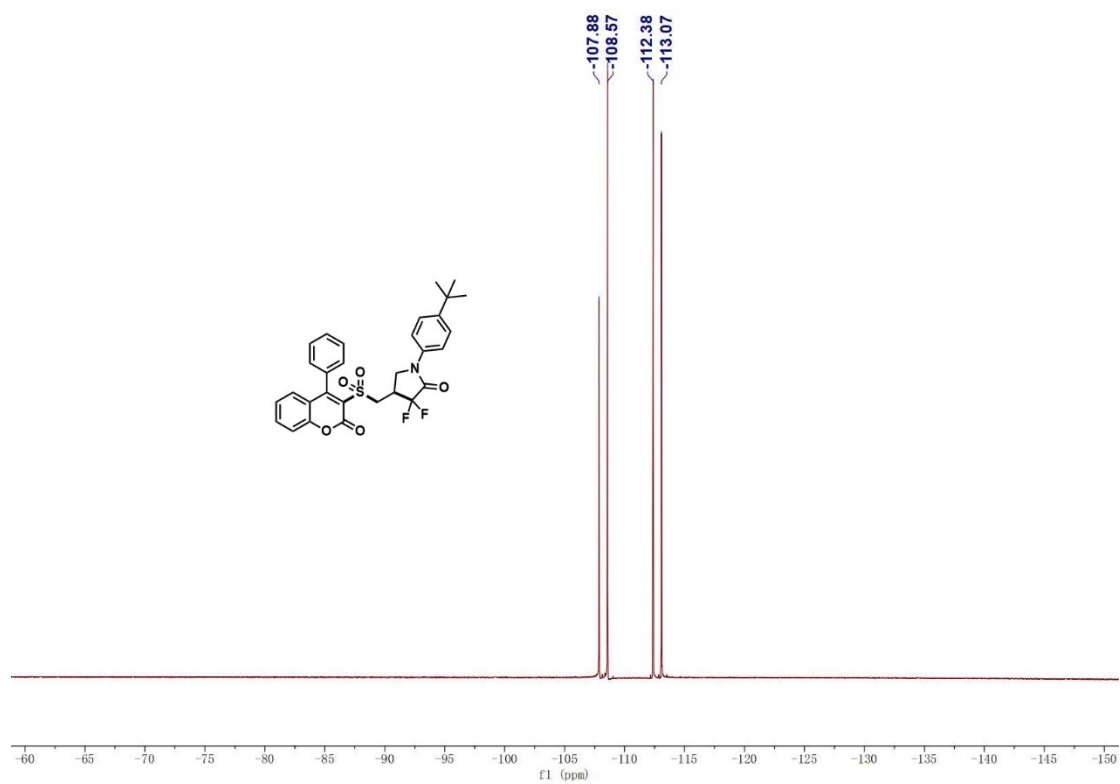

<sup>1</sup>H NMR-spectrum (400 MHz, DMSO-d<sub>6</sub>) of **4ag**

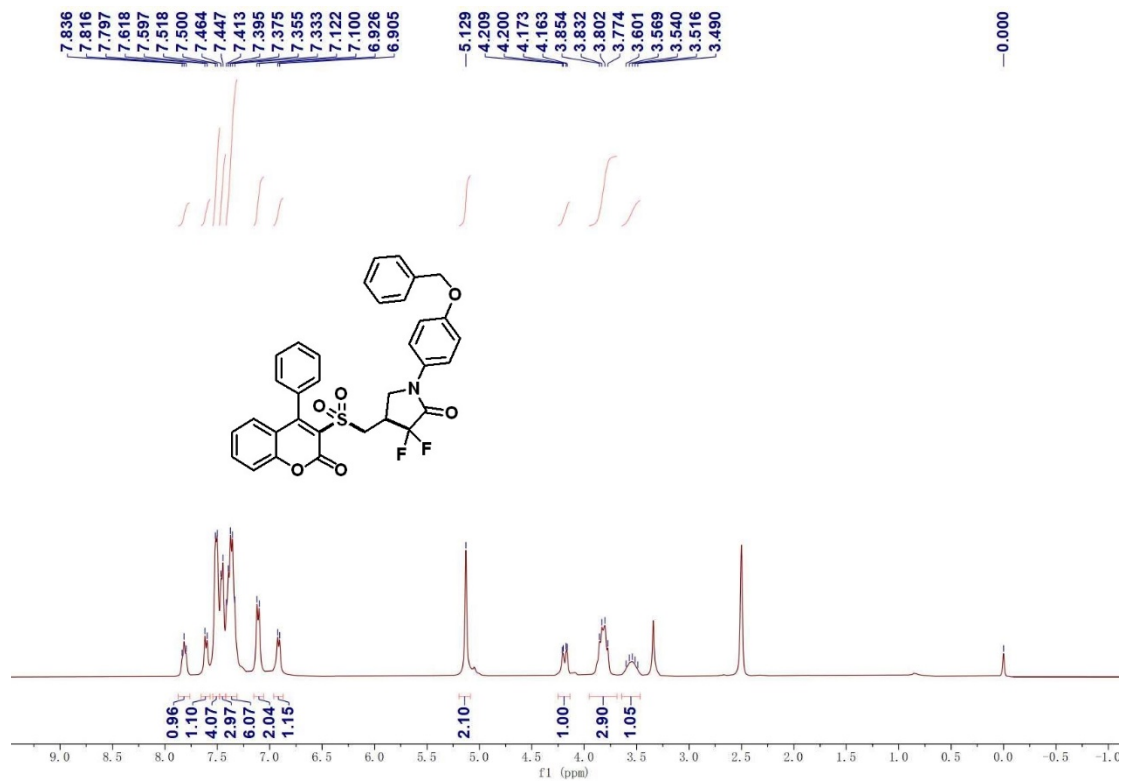

<sup>13</sup>C NMR-spectrum (101 MHz, DMSO-d<sub>6</sub>) of **4ag**

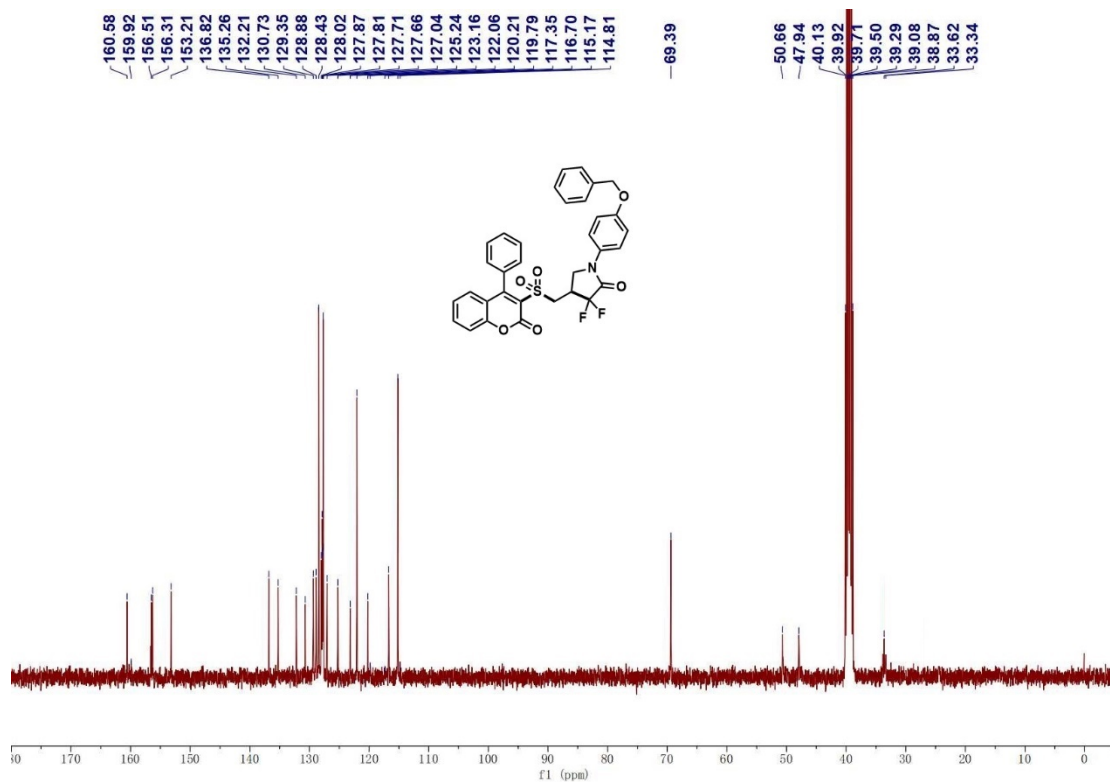

<sup>19</sup>F NMR-spectrum (376 MHz, DMSO-*d*<sub>6</sub>) of **4ag**

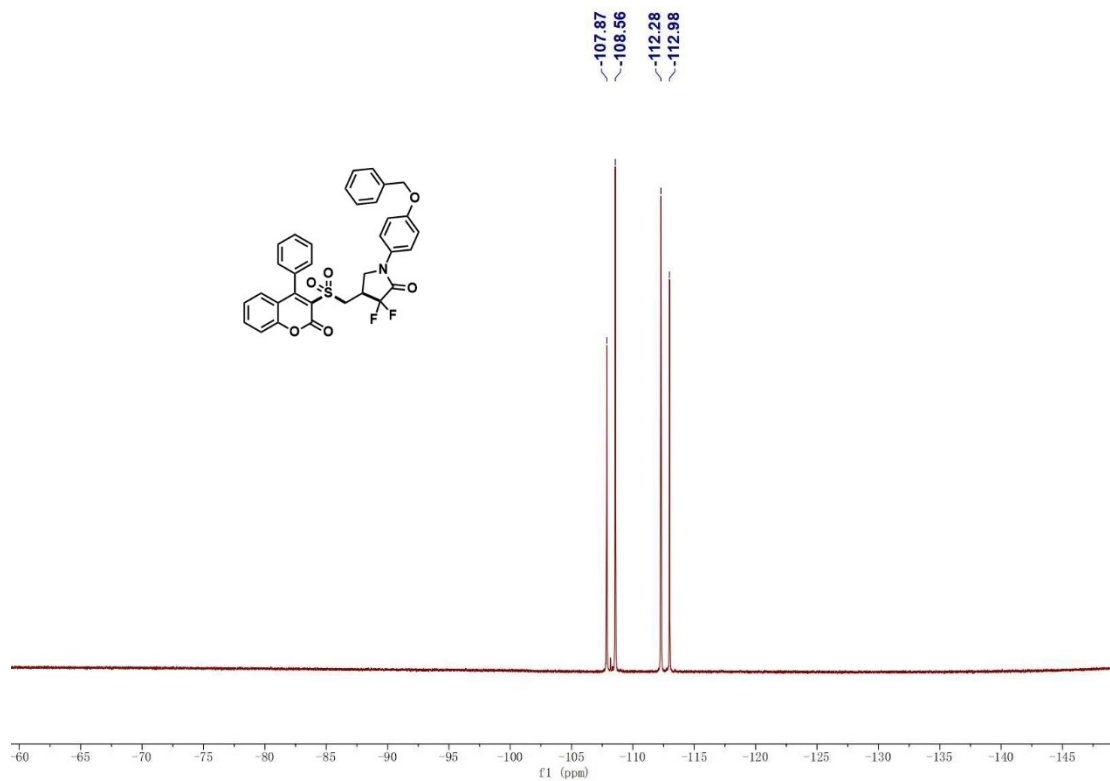

<sup>1</sup>H NMR-spectrum (400 MHz, DMSO-*d*<sub>6</sub>) of **4ah**

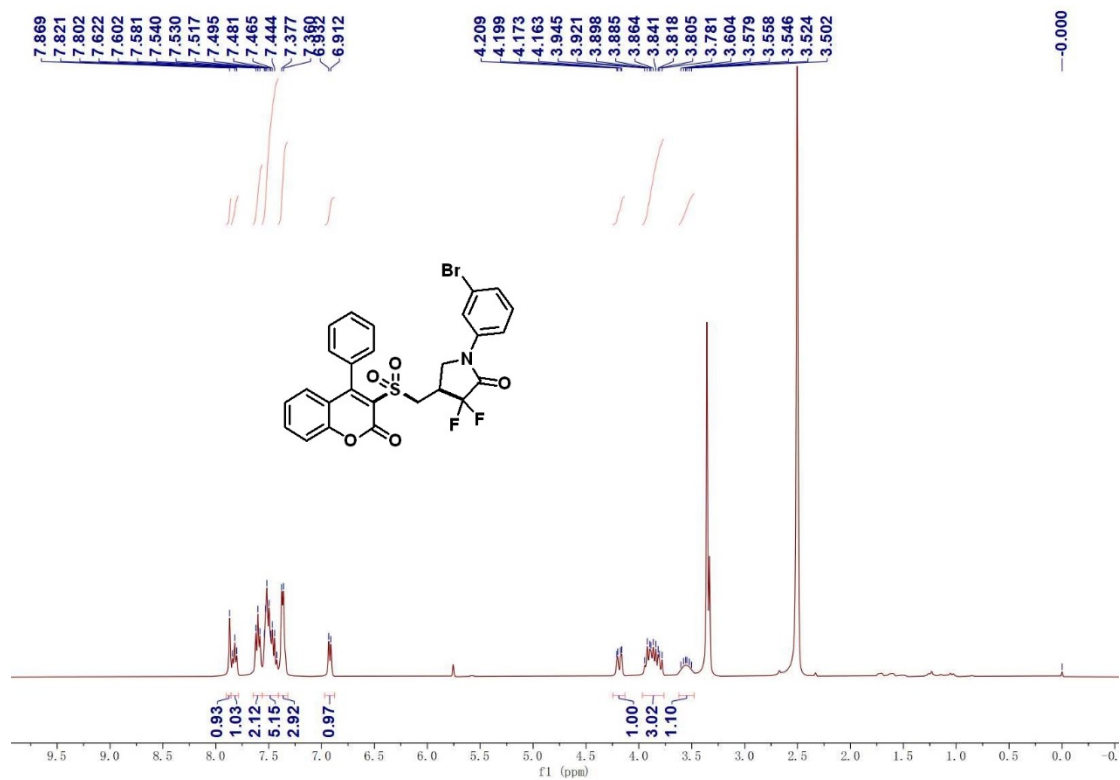

<sup>13</sup>C NMR-spectrum (101 MHz, DMSO-*d*<sub>6</sub>) of **4ah**

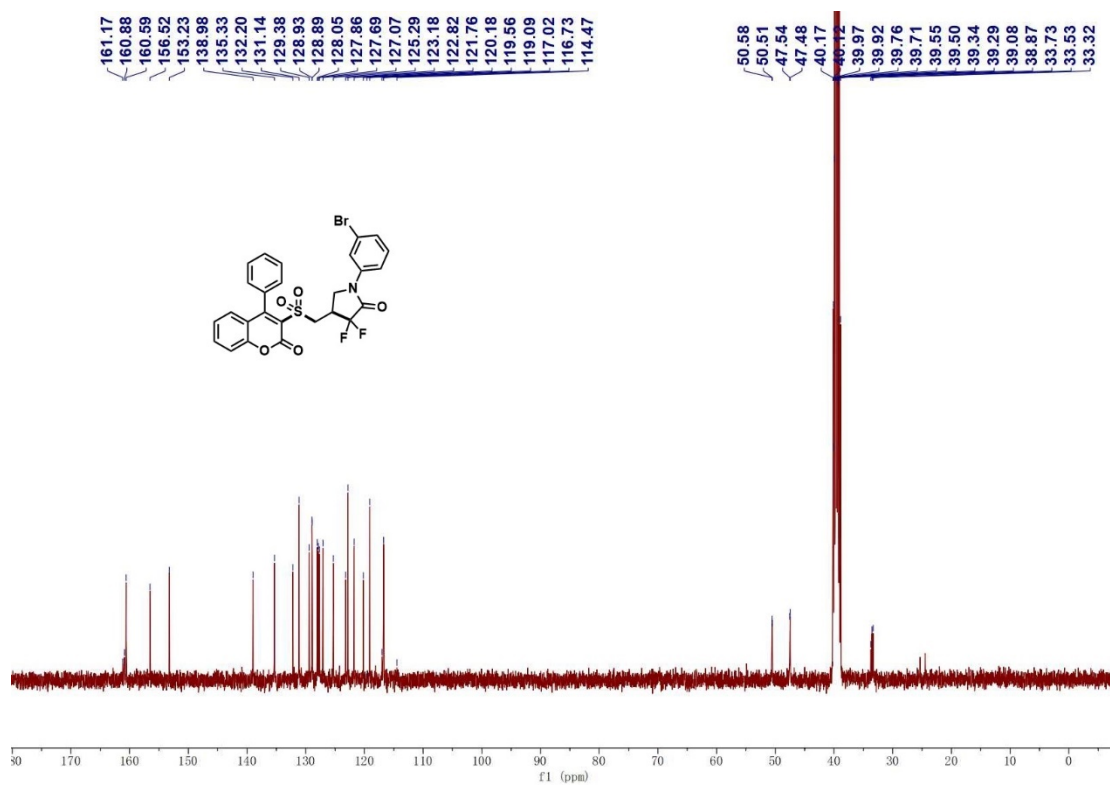

<sup>19</sup>F NMR-spectrum (376 MHz, DMSO-*d*<sub>6</sub>) of **4ah**

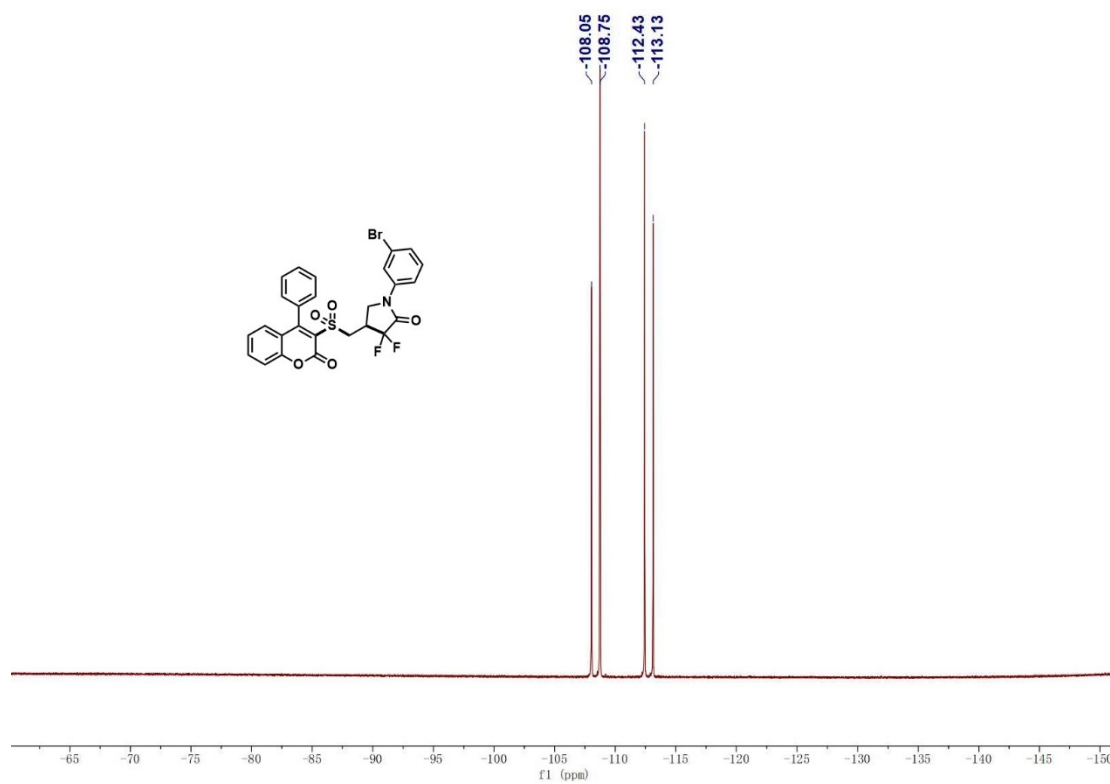

<sup>1</sup>H NMR-spectrum (400 MHz, DMSO-*d*<sub>6</sub>) of **4ai**

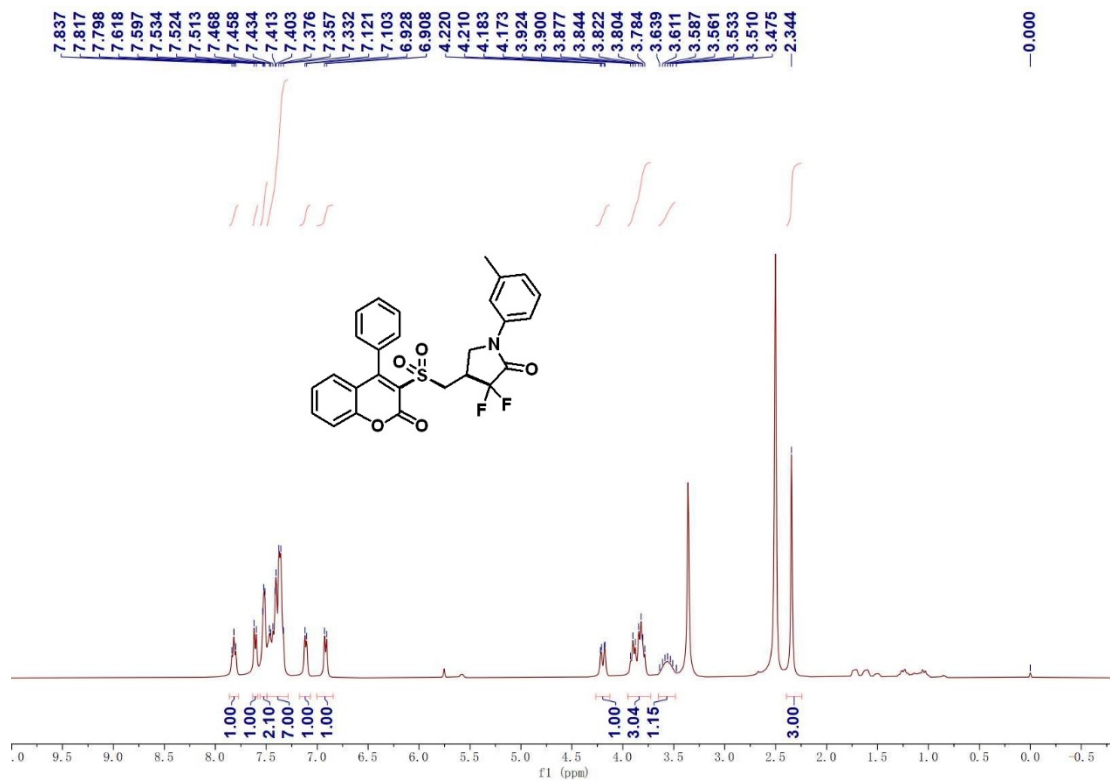

<sup>13</sup>C NMR-spectrum (101 MHz, DMSO-*d*<sub>6</sub>) of **4ai**

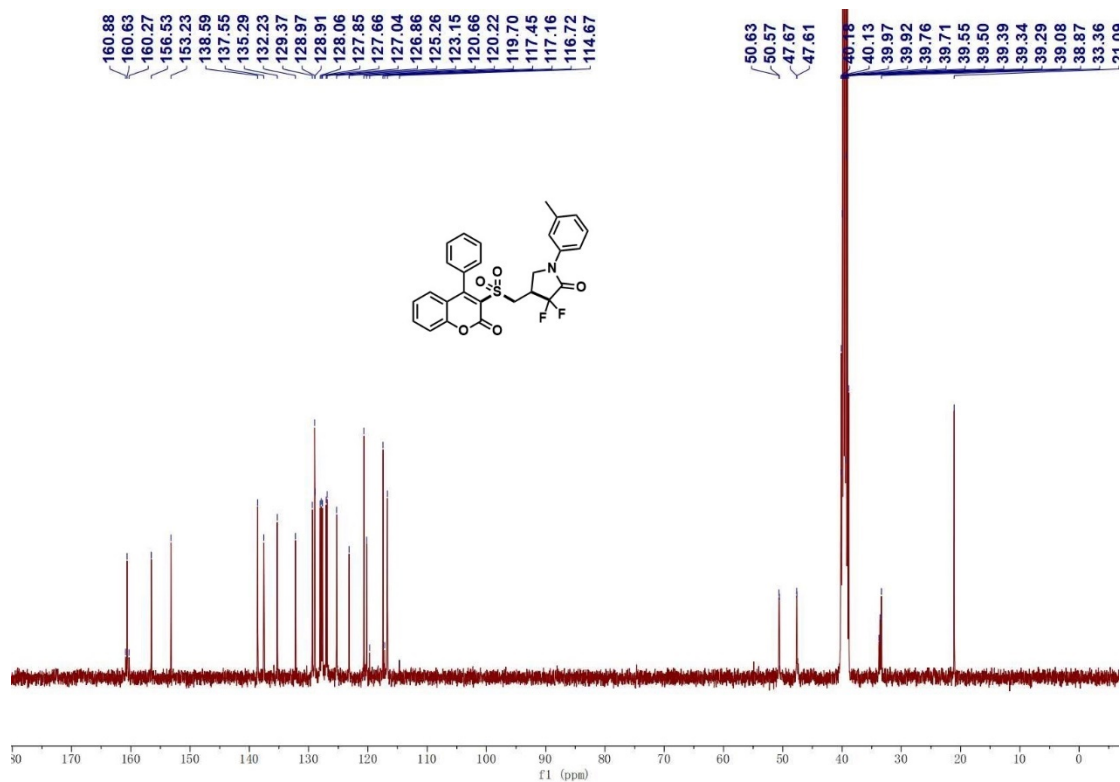

<sup>19</sup>F NMR-spectrum (376 MHz, DMSO-*d*<sub>6</sub>) of **4ai**

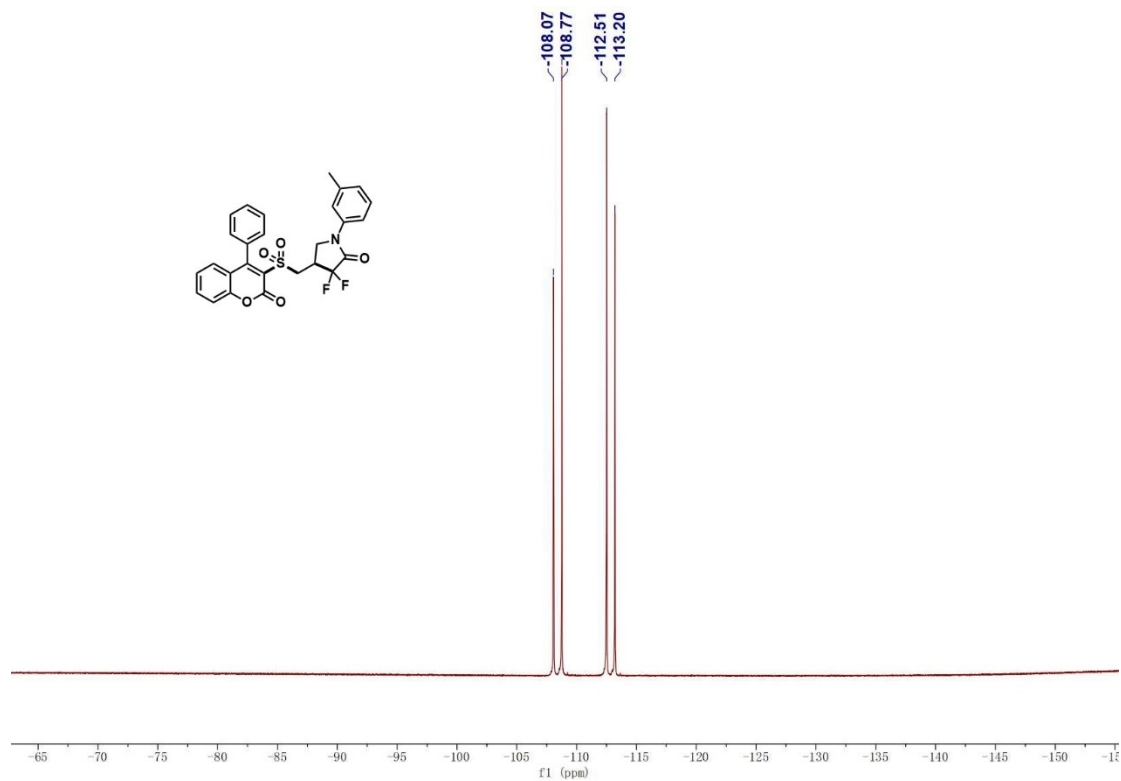

<sup>1</sup>H NMR-spectrum (400 MHz, DMSO-*d*<sub>6</sub>) of **4aj**

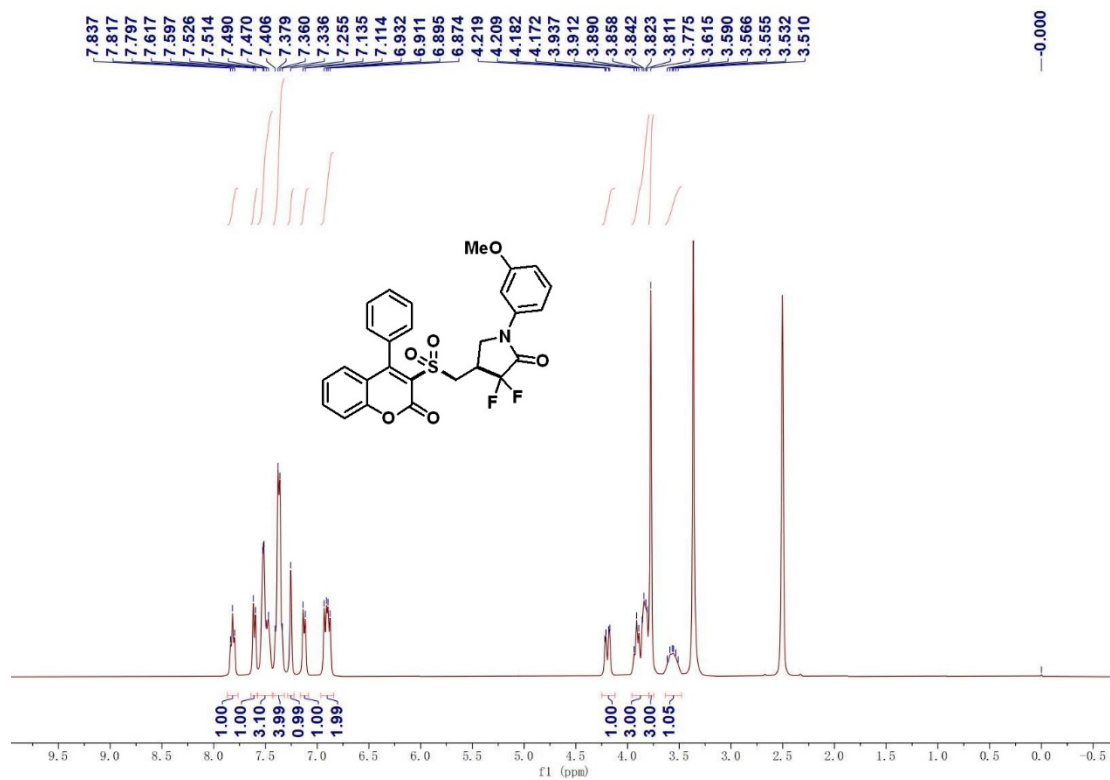



<sup>13</sup>C NMR-spectrum (101 MHz, DMSO-*d*<sub>6</sub>) of **4aj**

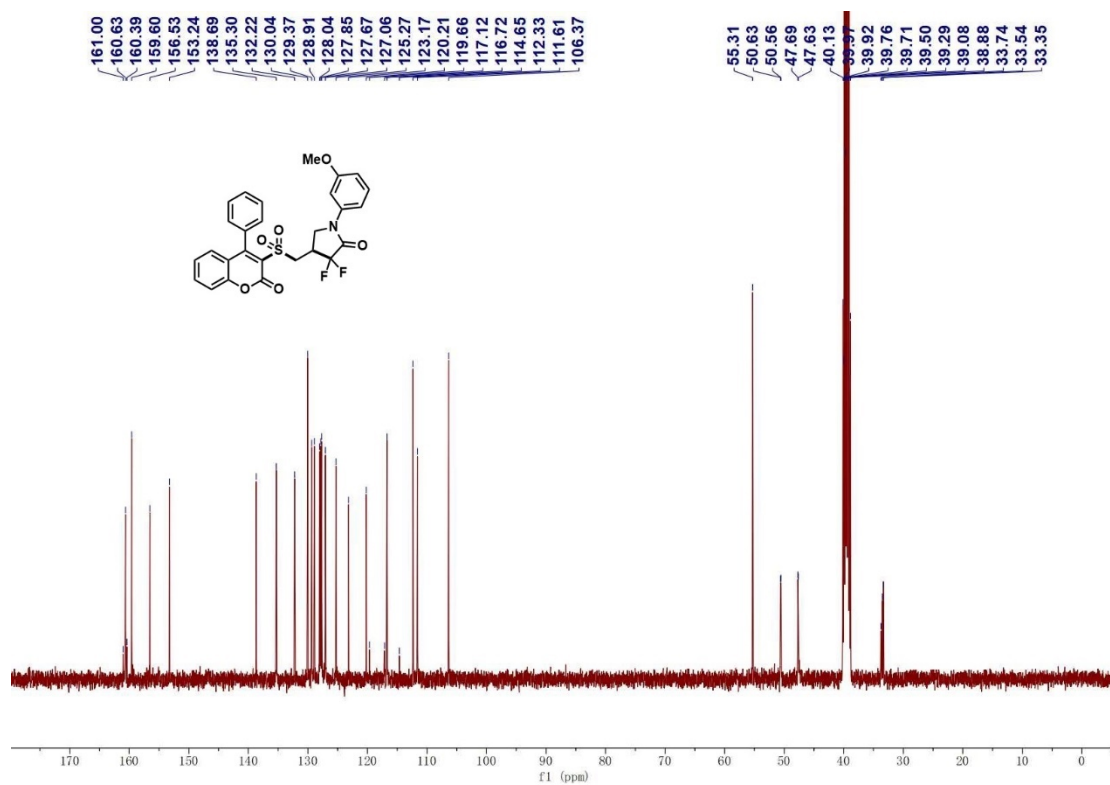

<sup>19</sup>F NMR-spectrum (376 MHz, DMSO-*d*<sub>6</sub>) of **4aj**

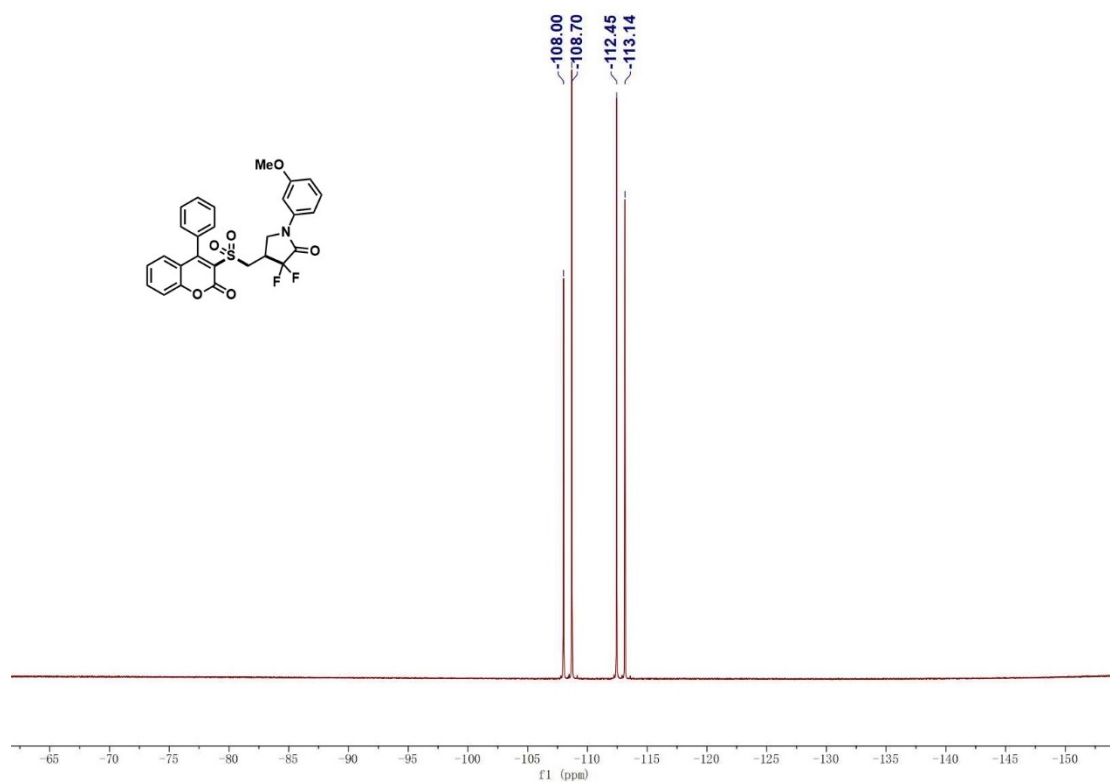

<sup>1</sup>H NMR-spectrum (400 MHz, DMSO-*d*<sub>6</sub>) of **4ak**

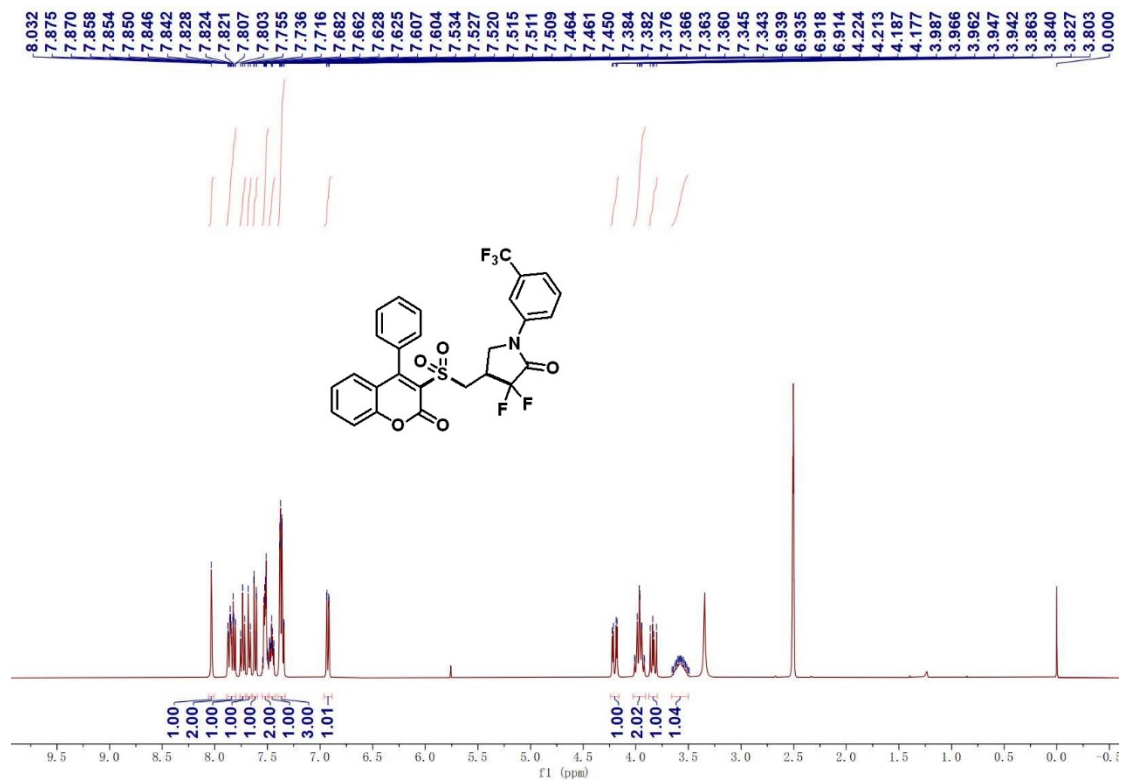

<sup>13</sup>C NMR-spectrum (101 MHz, DMSO-*d*<sub>6</sub>) of **4ak**

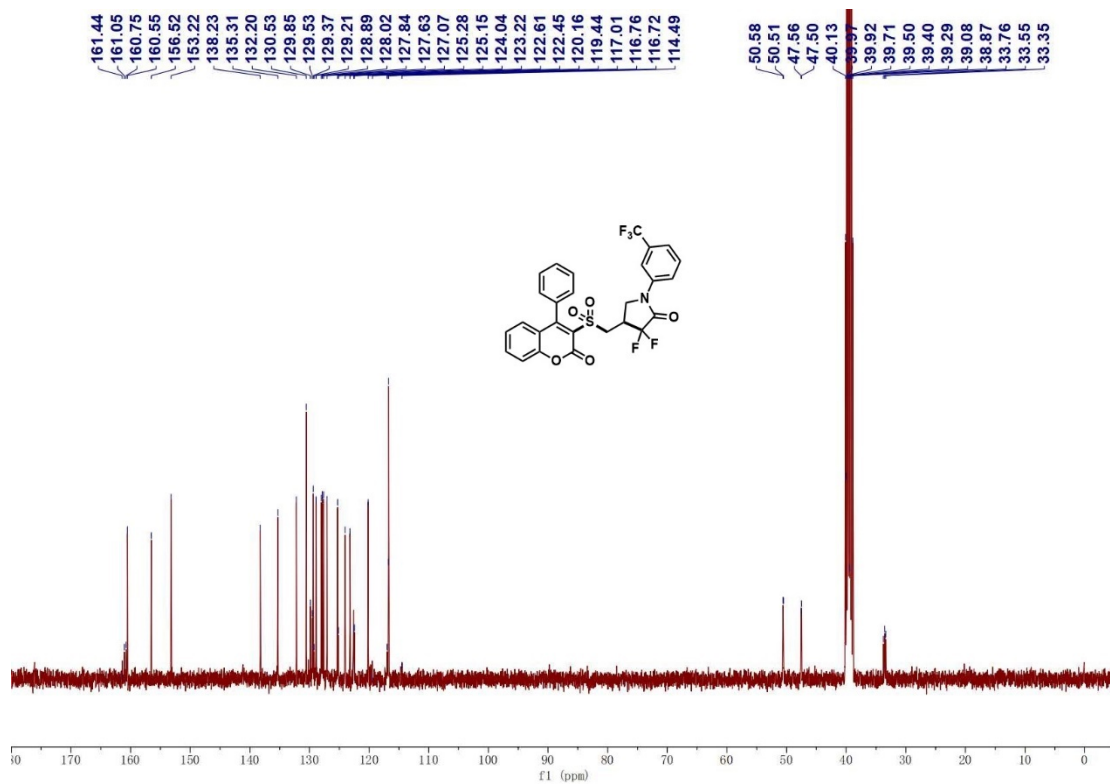

<sup>19</sup>F NMR-spectrum (376 MHz, DMSO-*d*<sub>6</sub>) of **4ak**

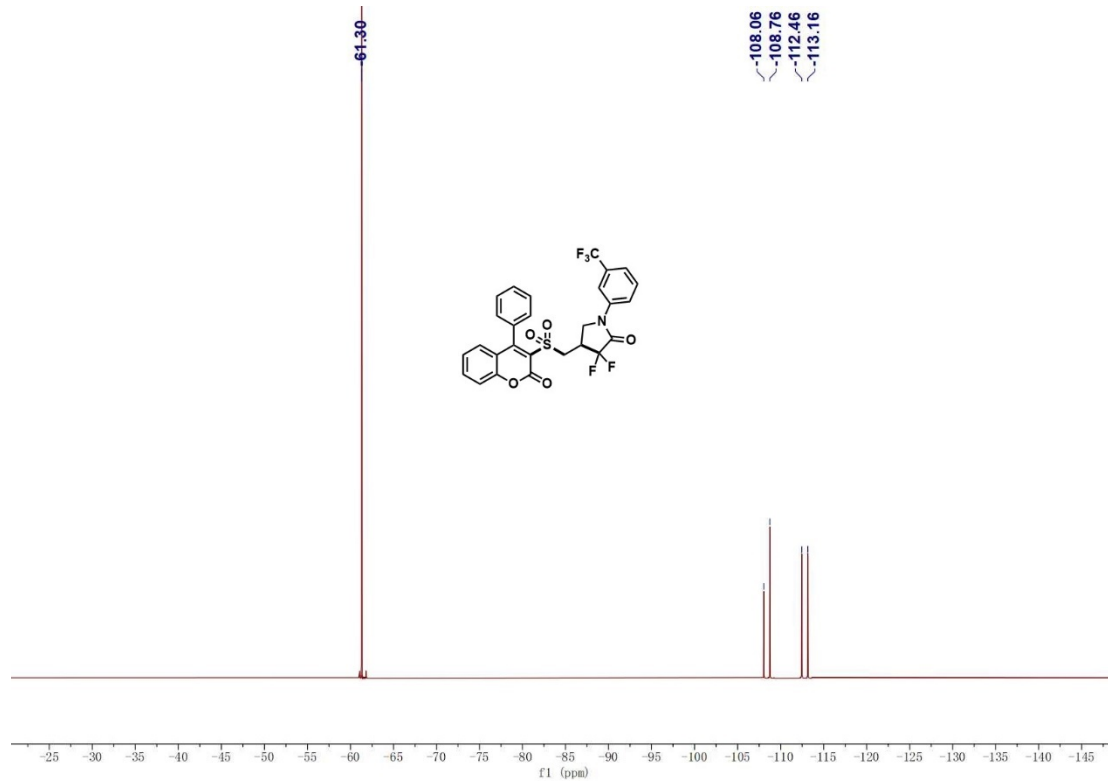

<sup>1</sup>H NMR-spectrum (400 MHz, DMSO-*d*<sub>6</sub>) of **4al**

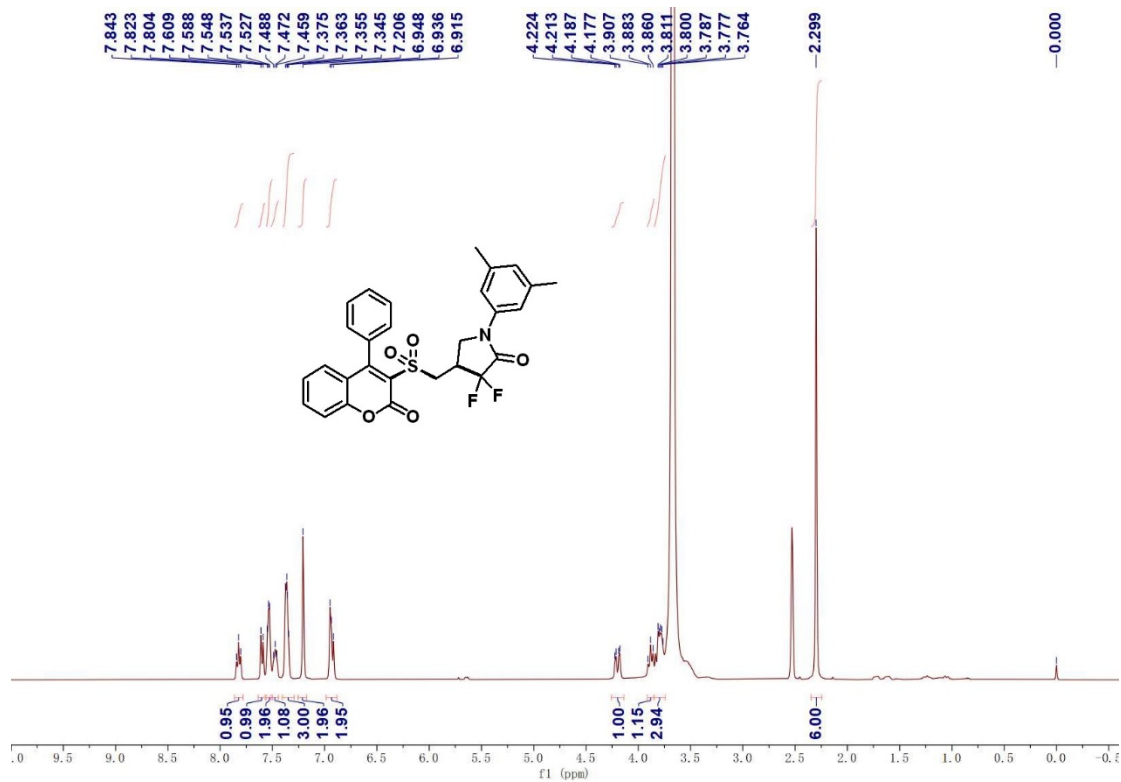

<sup>13</sup>C NMR-spectrum (101 MHz, DMSO-*d*<sub>6</sub>) of **4al**

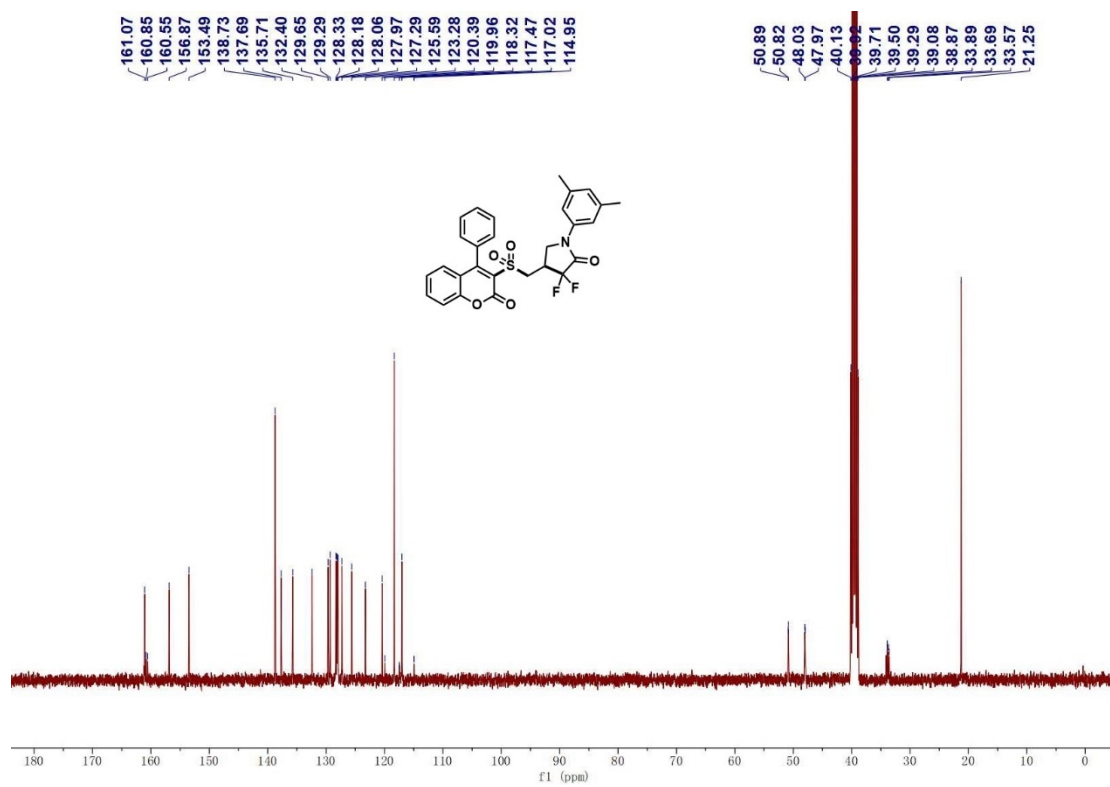

<sup>19</sup>F NMR-spectrum (376 MHz, DMSO-*d*<sub>6</sub>) of **4al**

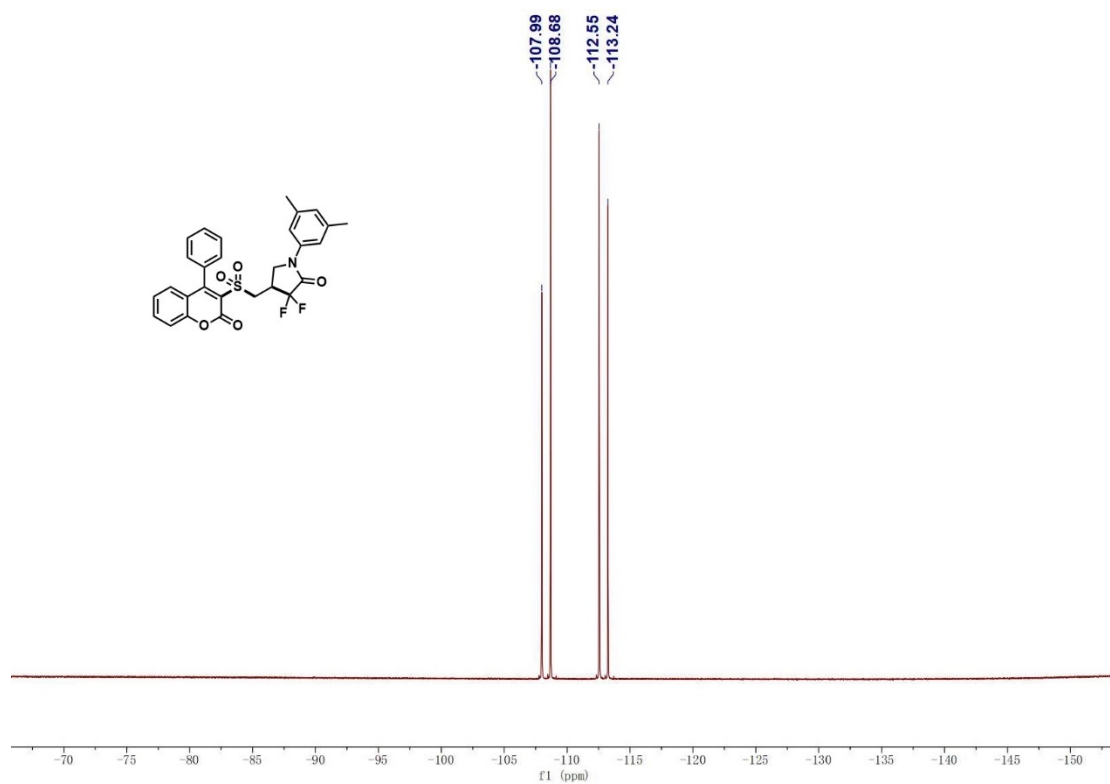

<sup>1</sup>H NMR-spectrum (400 MHz, CDCl<sub>3</sub>) of **4am**

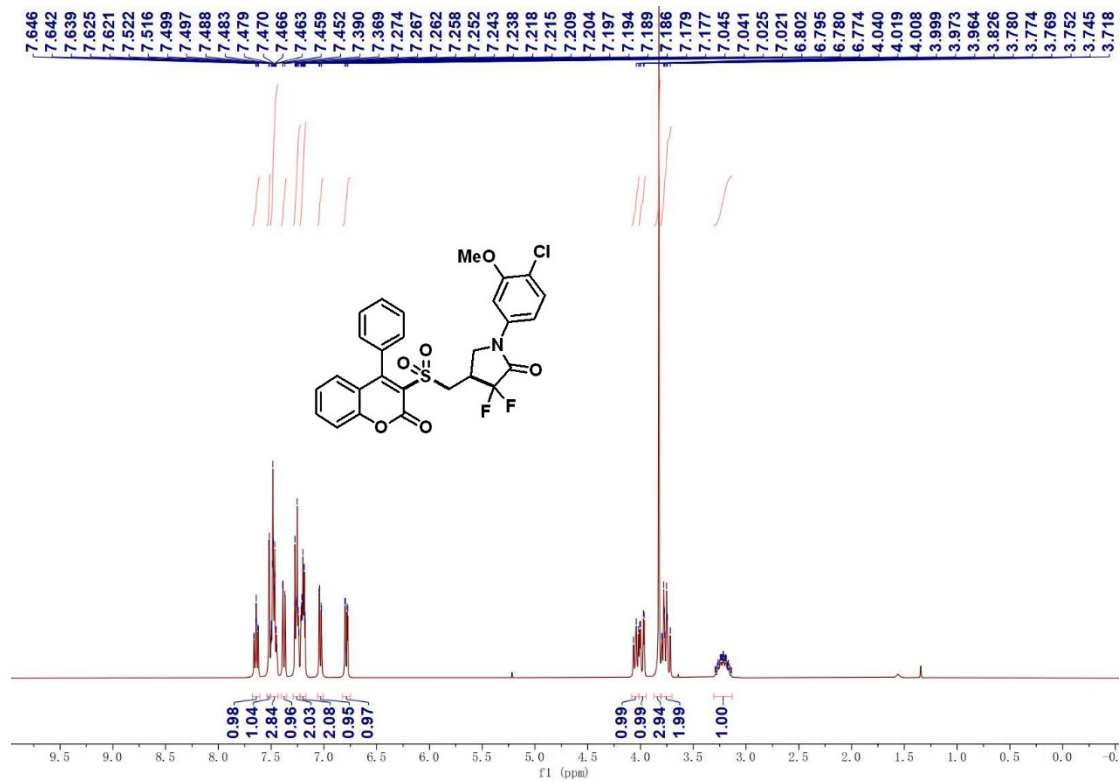

<sup>13</sup>C NMR-spectrum (101 MHz, CDCl<sub>3</sub>) of **4am**

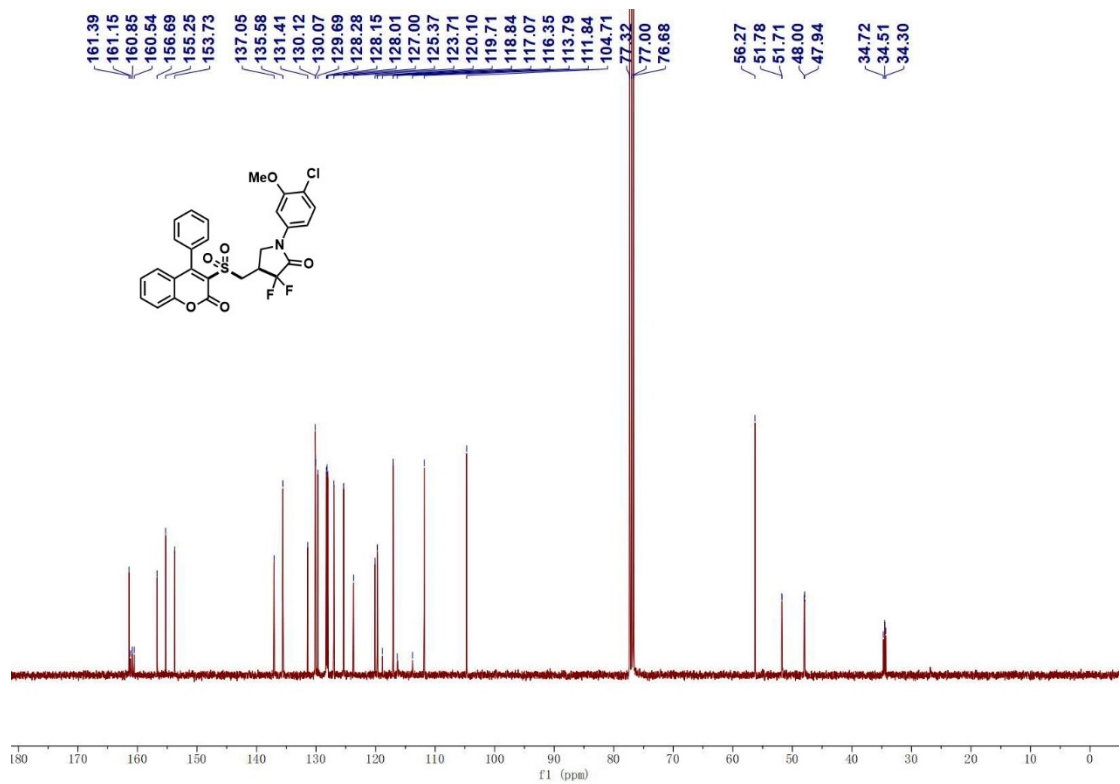

<sup>19</sup>F NMR-spectrum (376 MHz, CDCl<sub>3</sub>) of **4am**

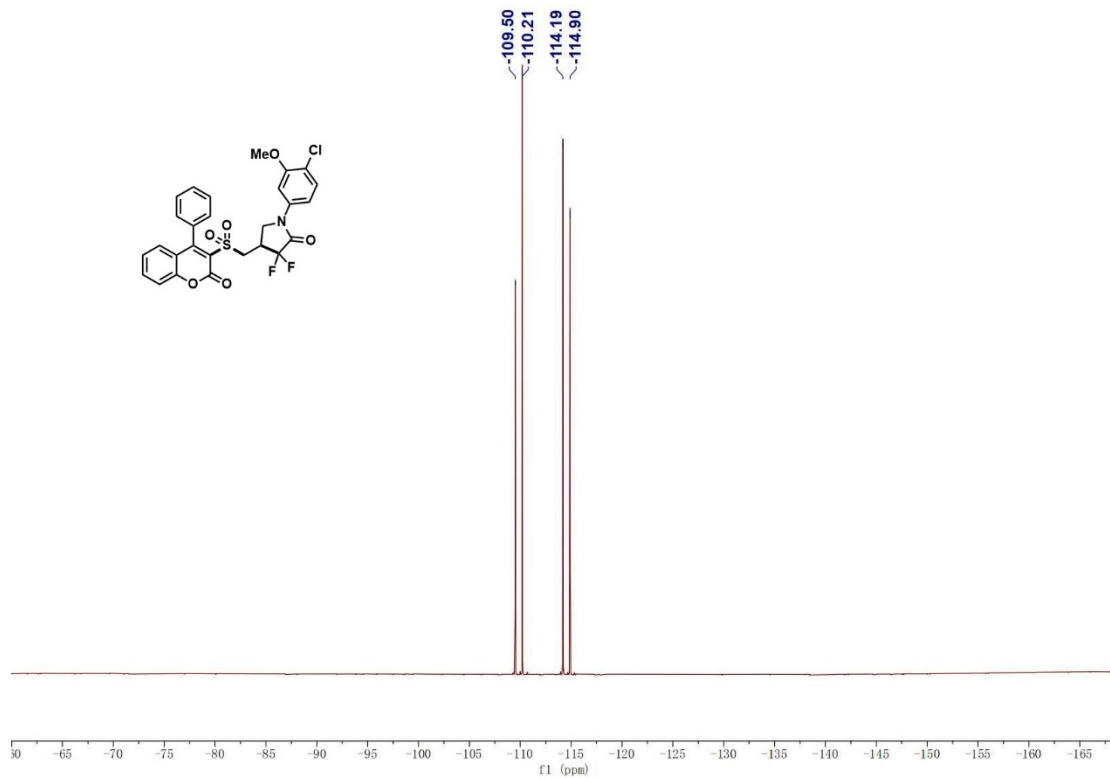

<sup>1</sup>H NMR-spectrum (400 MHz, DMSO-*d*<sub>6</sub>) of **4an**

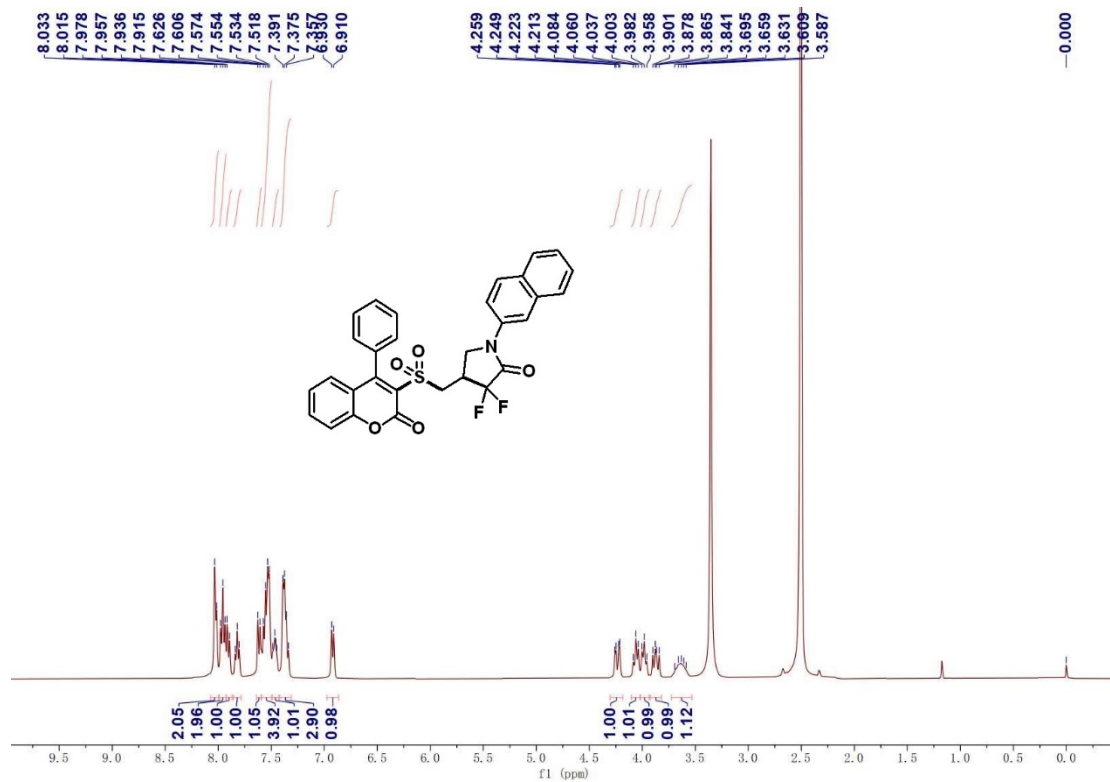

<sup>13</sup>C NMR-spectrum (101 MHz, DMSO-*d*<sub>6</sub>) of **4an**

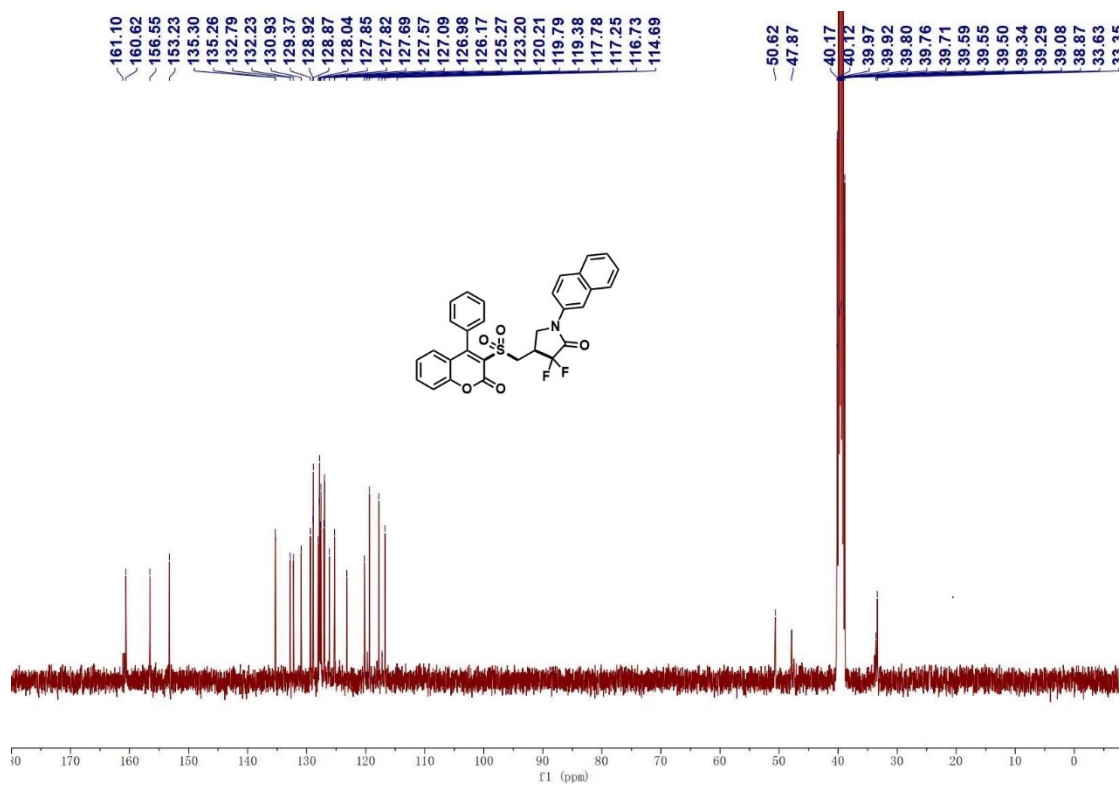

<sup>19</sup>F NMR-spectrum (376 MHz, DMSO-*d*<sub>6</sub>) of **4an**

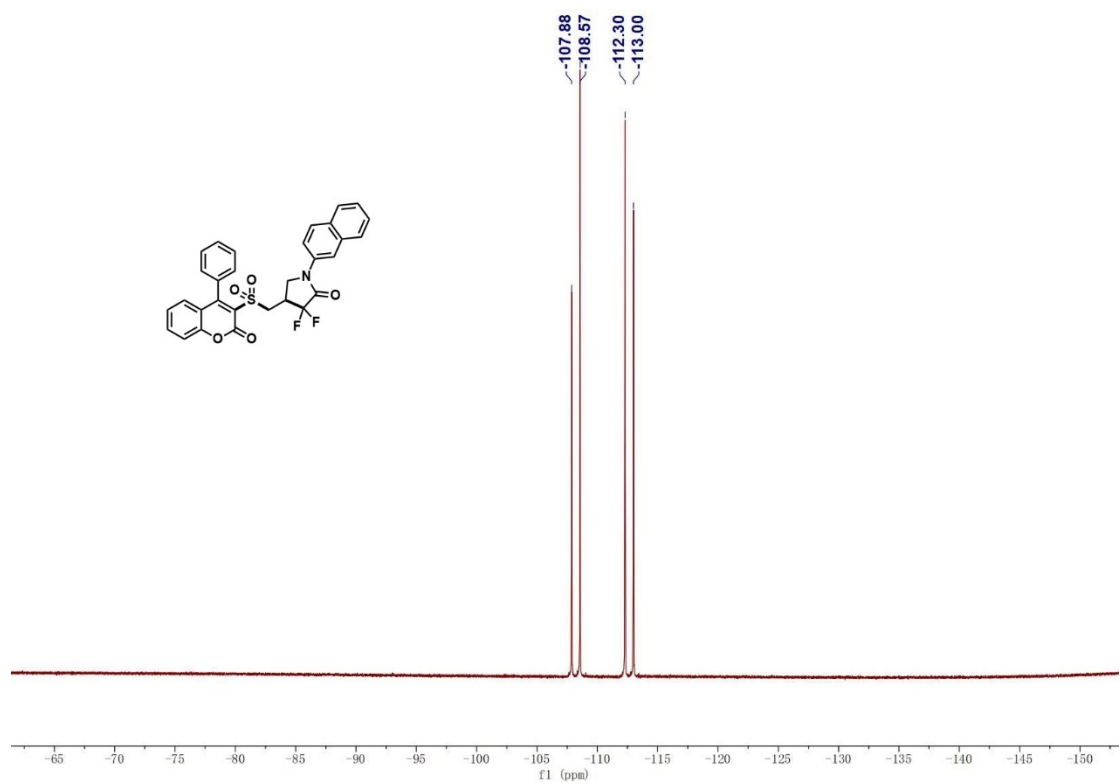

<sup>1</sup>H NMR-spectrum (400 MHz, DMSO-*d*<sub>6</sub>) of **4ao**

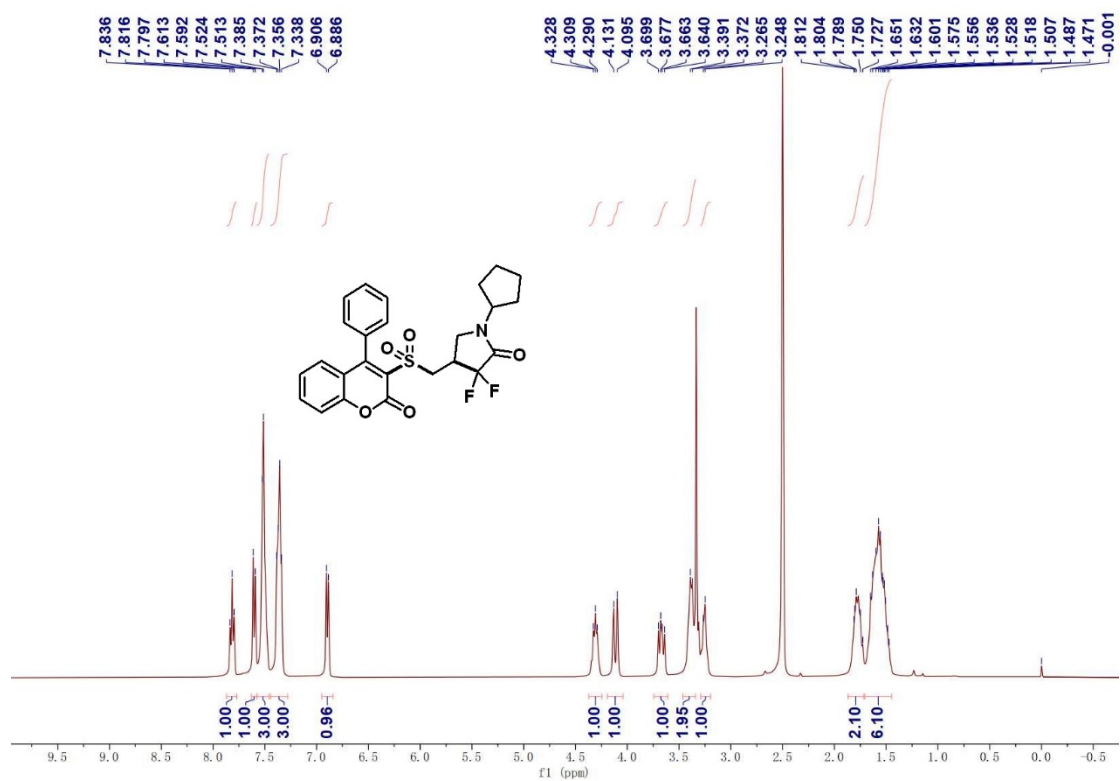

<sup>13</sup>C NMR-spectrum (101 MHz, DMSO-*d*<sub>6</sub>) of **4ao**

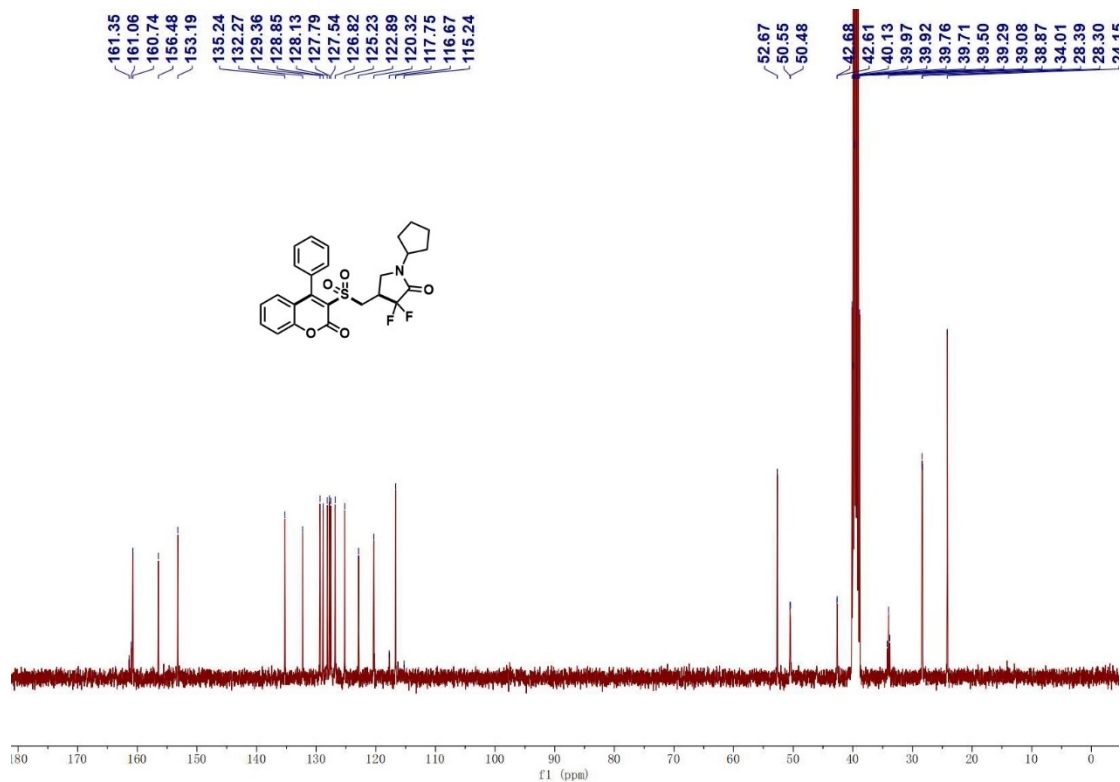



<sup>19</sup>F NMR-spectrum (376 MHz, DMSO-*d*<sub>6</sub>) of **4a**

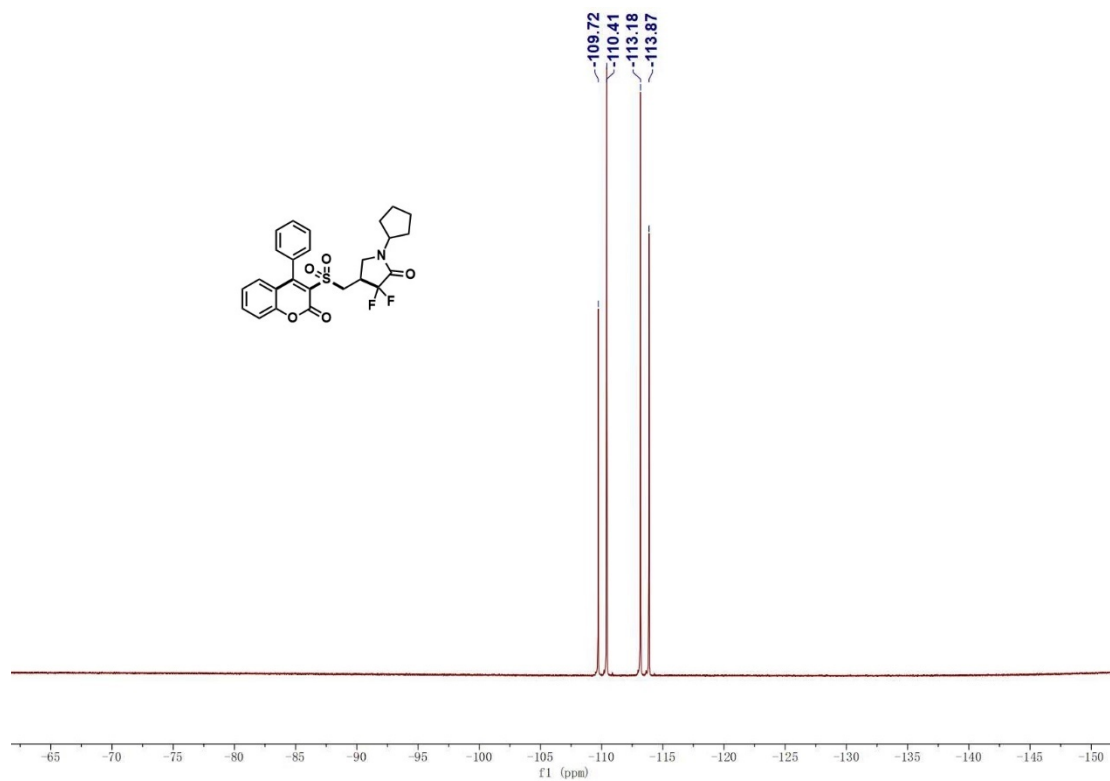

<sup>1</sup>H NMR-spectrum (400 MHz, DMSO-*d*<sub>6</sub>) of **4ba**

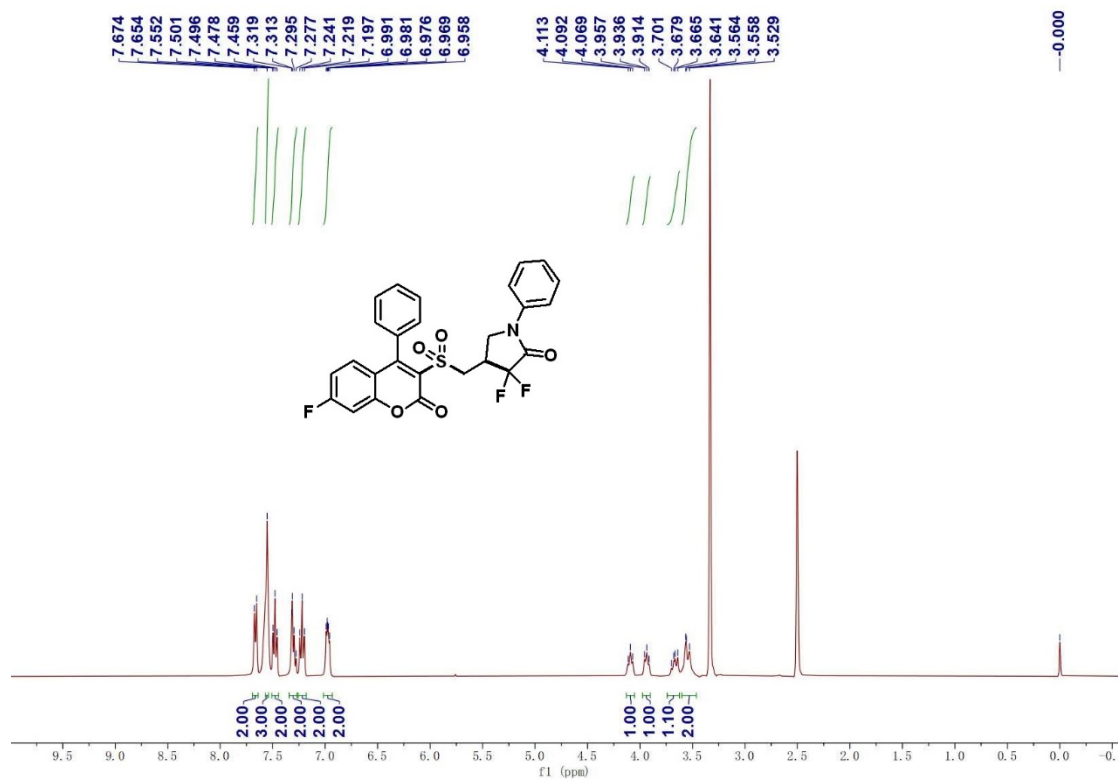

<sup>13</sup>C NMR-spectrum (101 MHz, DMSO-*d*<sub>6</sub>) of **4ba**

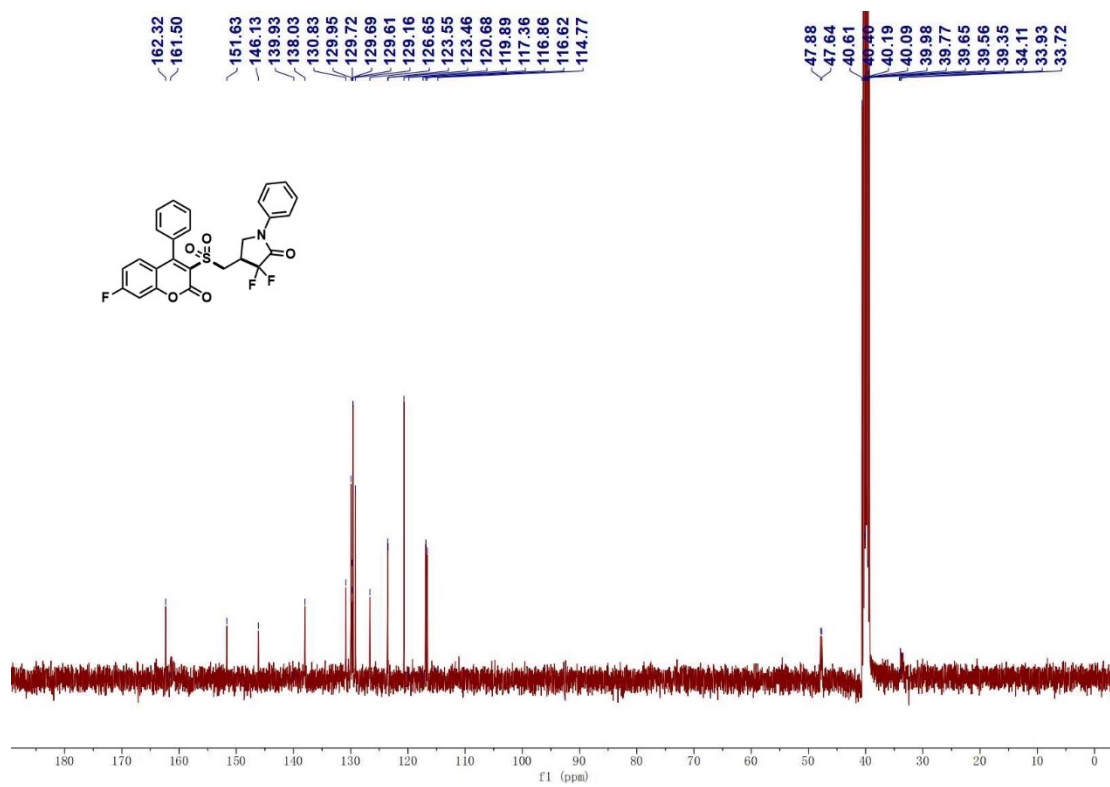

<sup>19</sup>F NMR-spectrum (376 MHz, DMSO-*d*<sub>6</sub>) of **4ba**

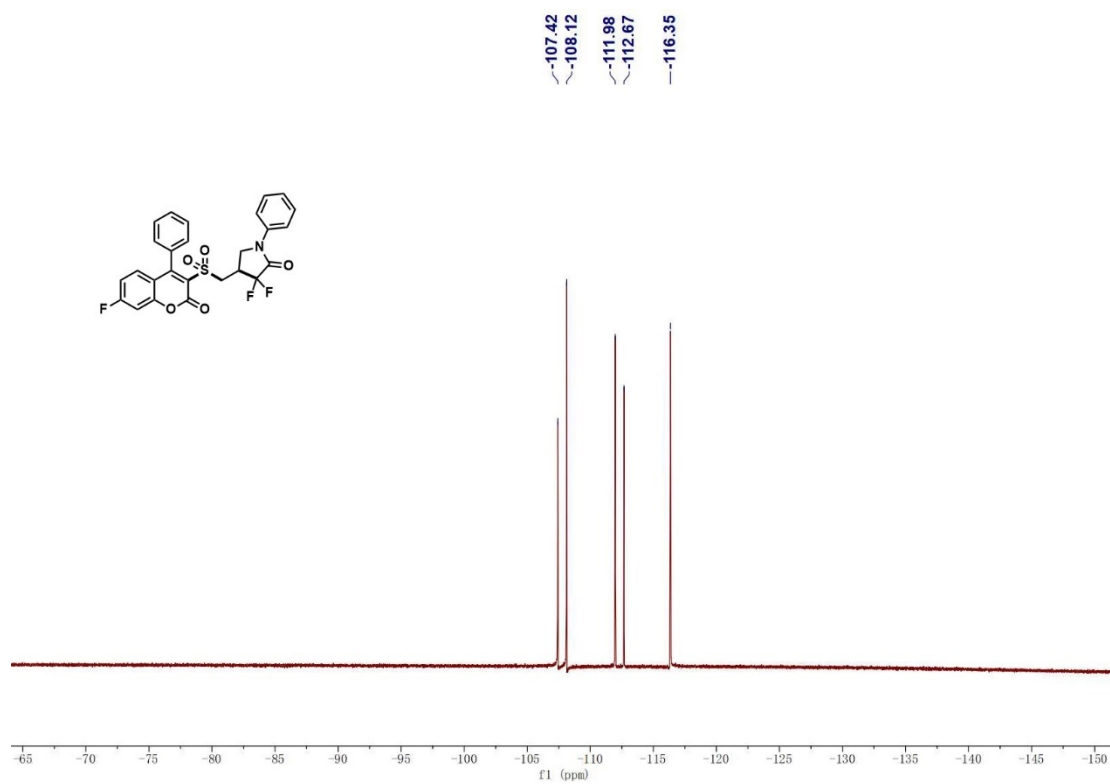

<sup>1</sup>H NMR-spectrum (400 MHz, DMSO-*d*<sub>6</sub>) of **4ca**

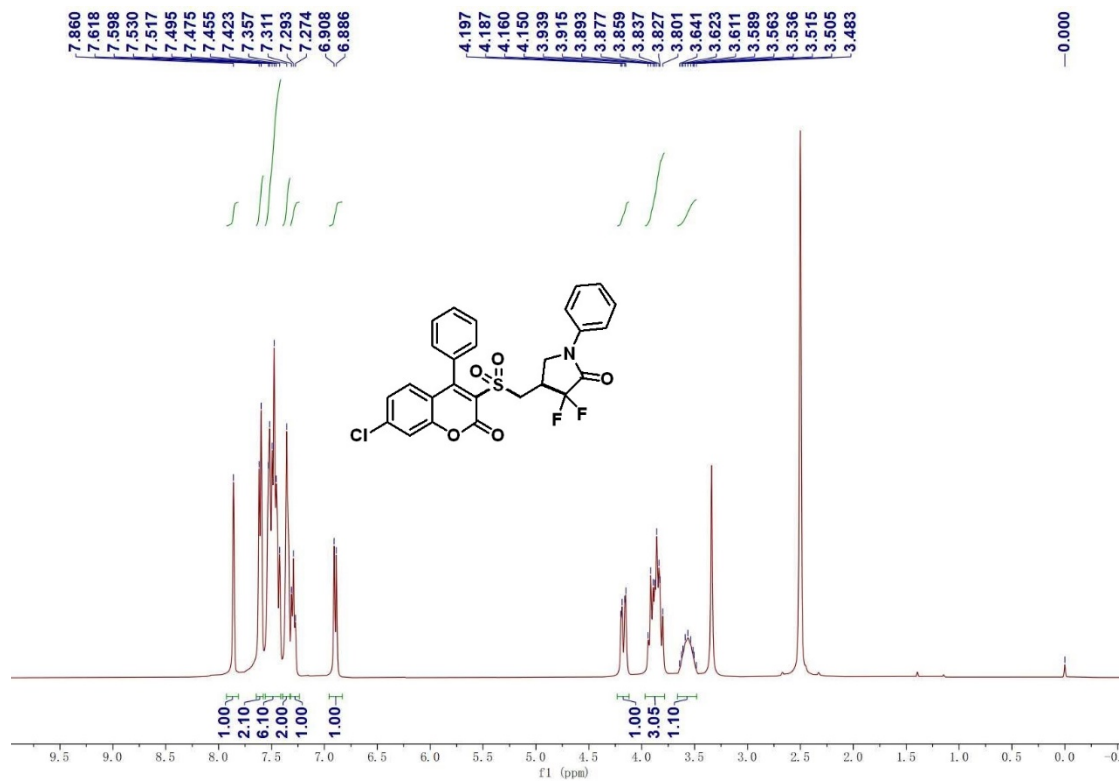

<sup>13</sup>C NMR-spectrum (101 MHz, DMSO-*d*<sub>6</sub>) of **4ca**

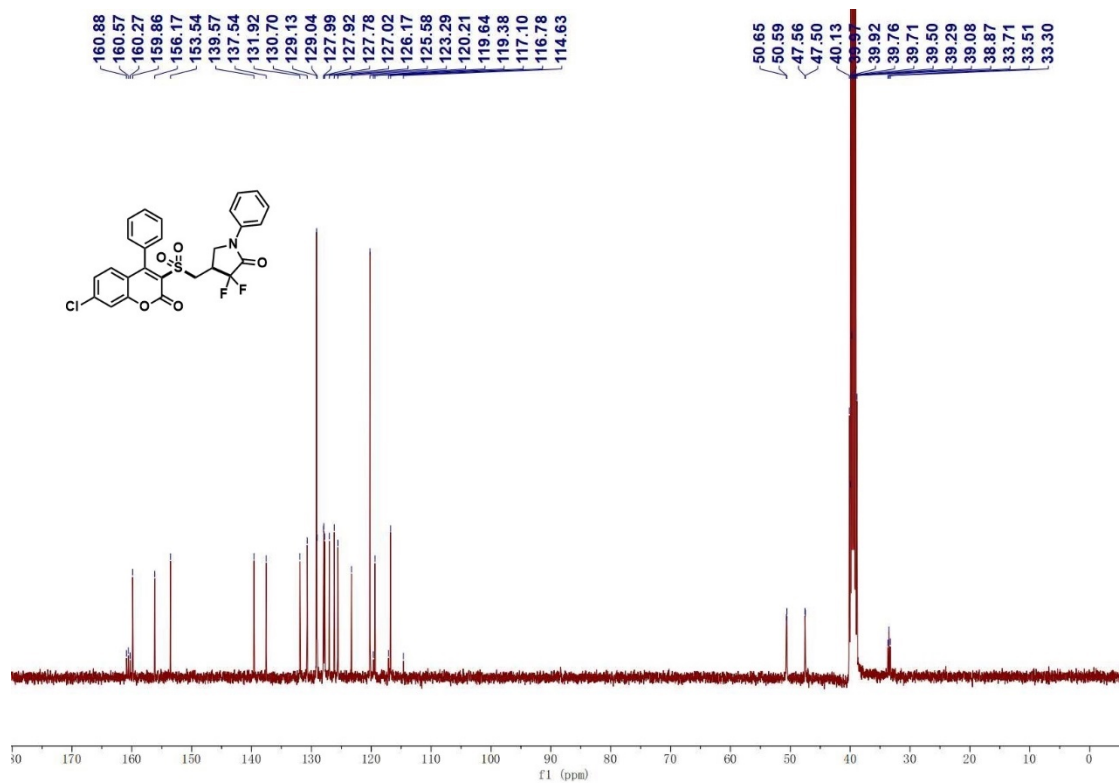

<sup>19</sup>F NMR-spectrum (376 MHz, DMSO-*d*<sub>6</sub>) of **4ca**

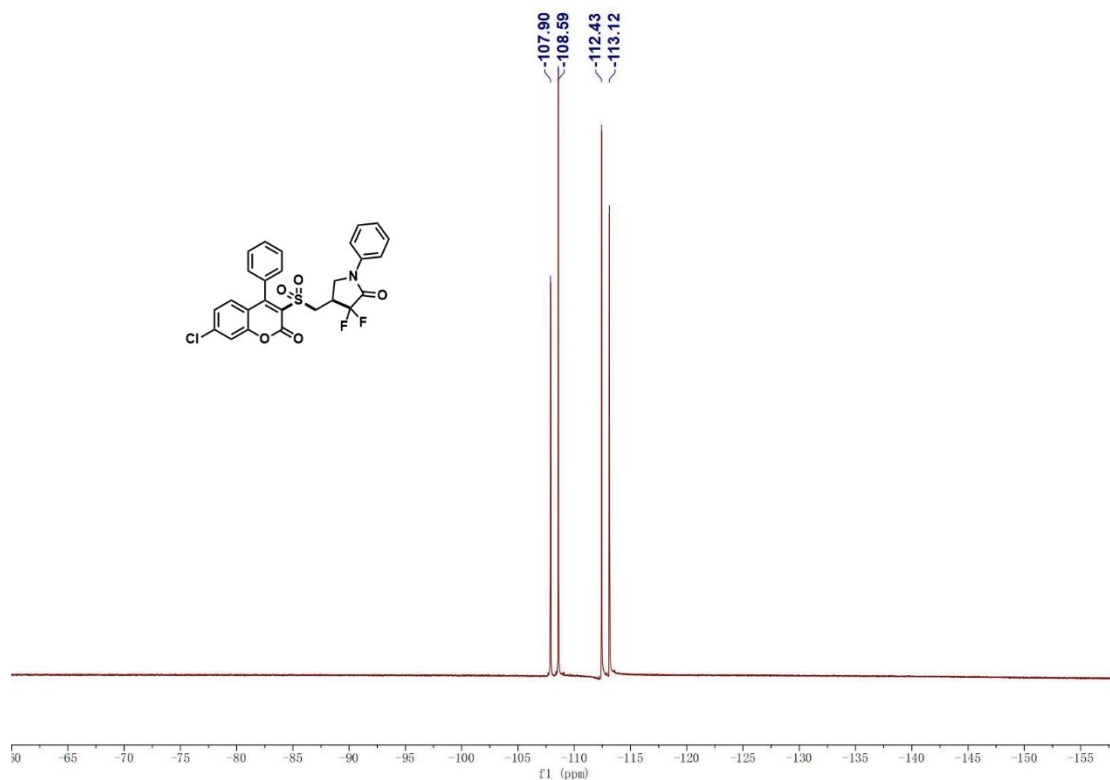

<sup>1</sup>H NMR-spectrum (400 MHz, DMSO-*d*<sub>6</sub>) of **4da**

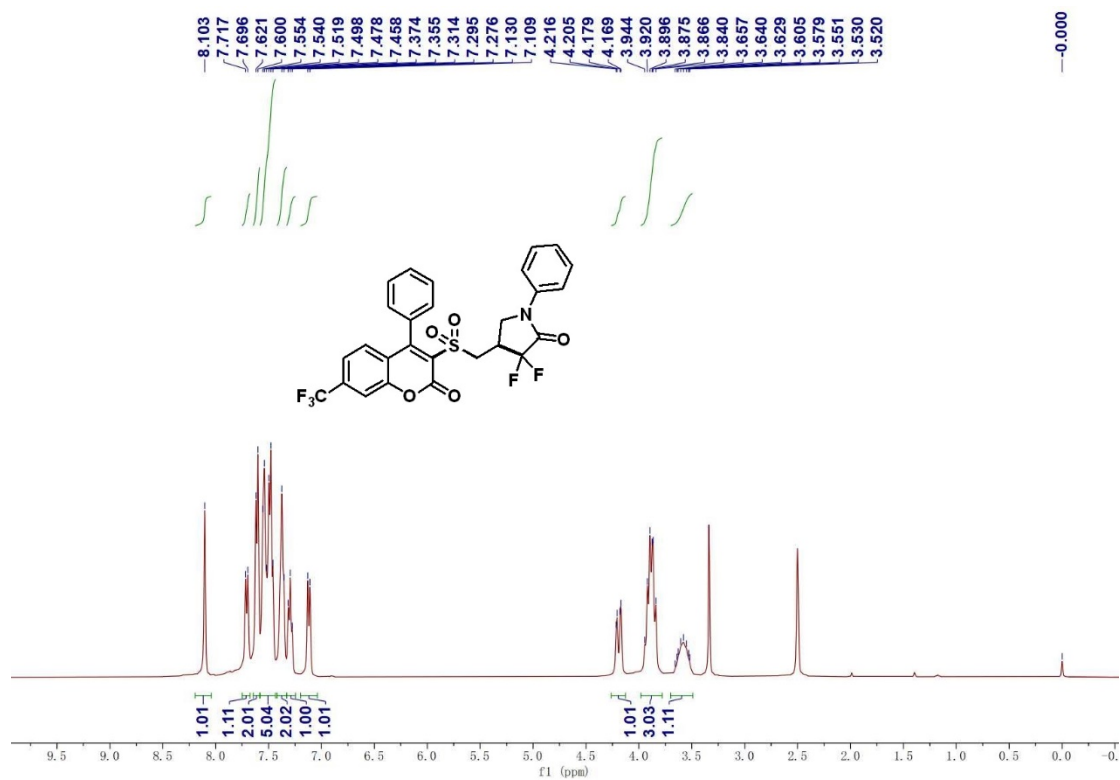

<sup>13</sup>C NMR-spectrum (101 MHz, DMSO-*d*<sub>6</sub>) of **4da**

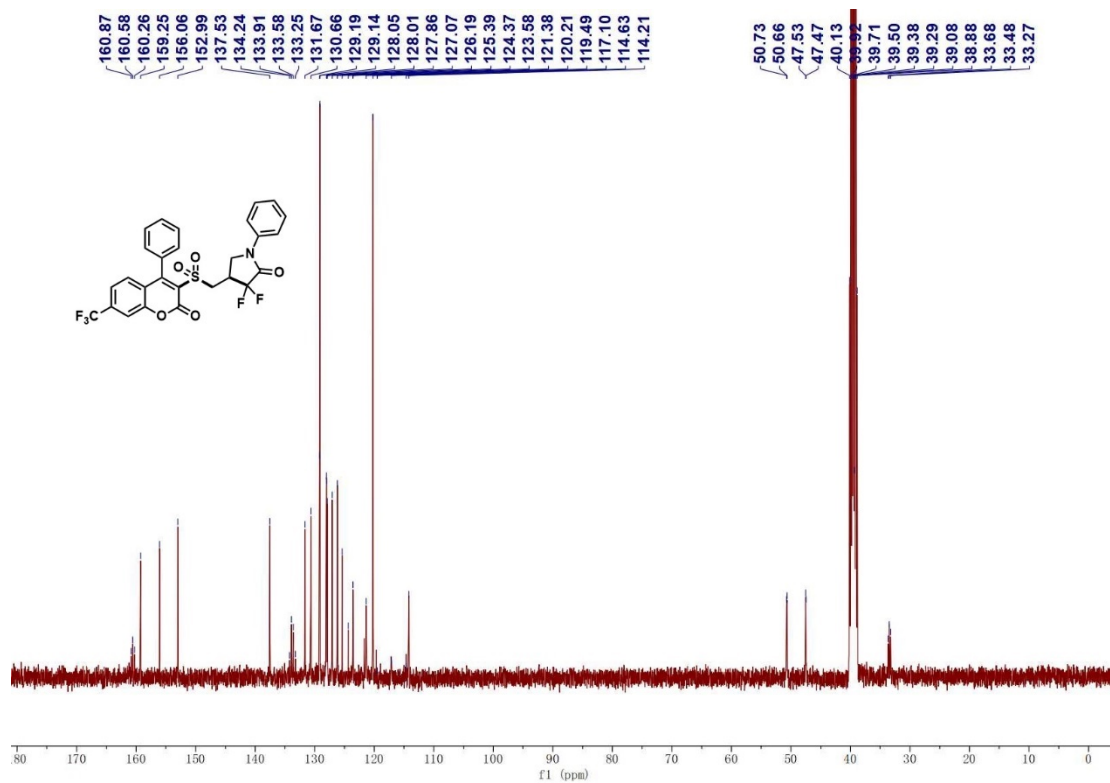

<sup>19</sup>F NMR-spectrum (376 MHz, DMSO-*d*<sub>6</sub>) of **4da**

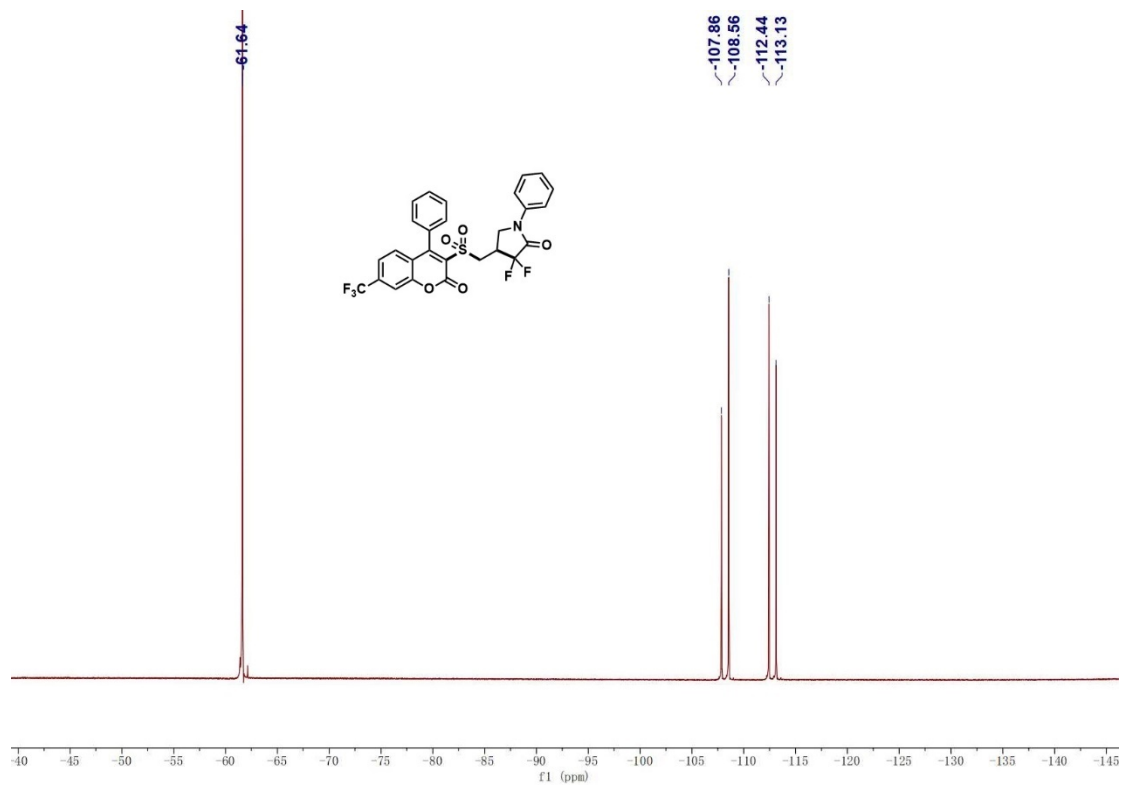

**<sup>1</sup>H NMR-spectrum (400 MHz, DMSO-*d*<sub>6</sub>) of 4ea**

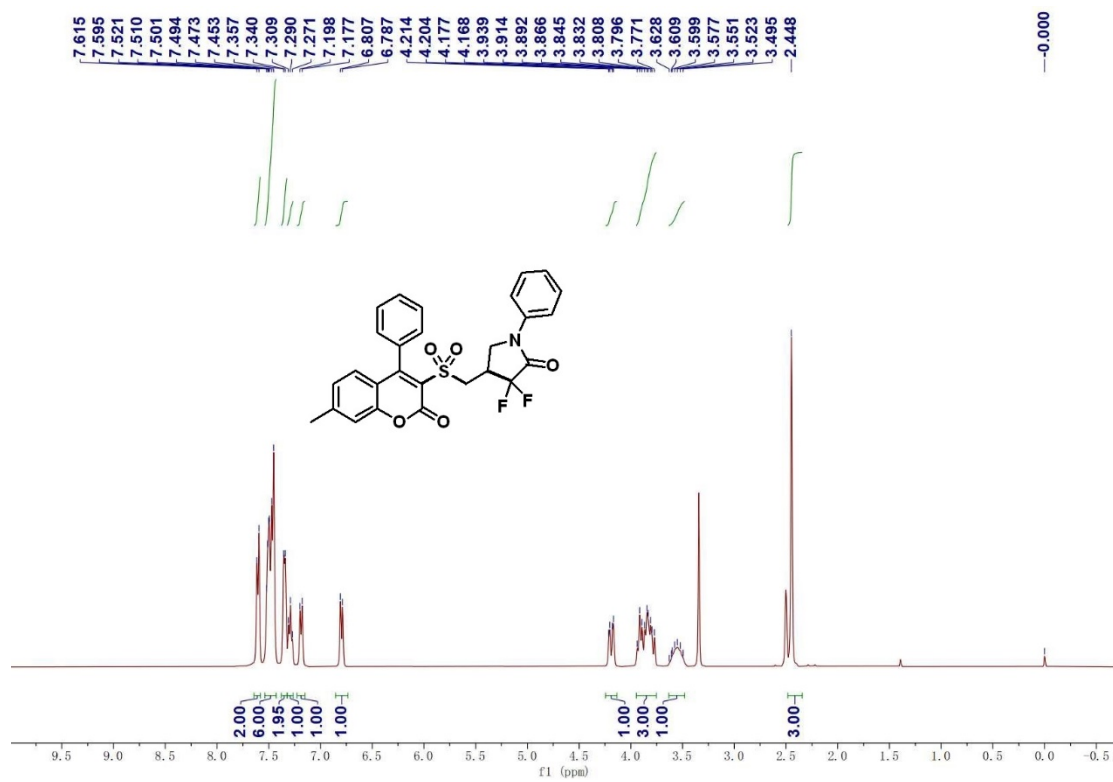

**<sup>13</sup>C NMR-spectrum (101 MHz, DMSO-*d*<sub>6</sub>) of 4ea**

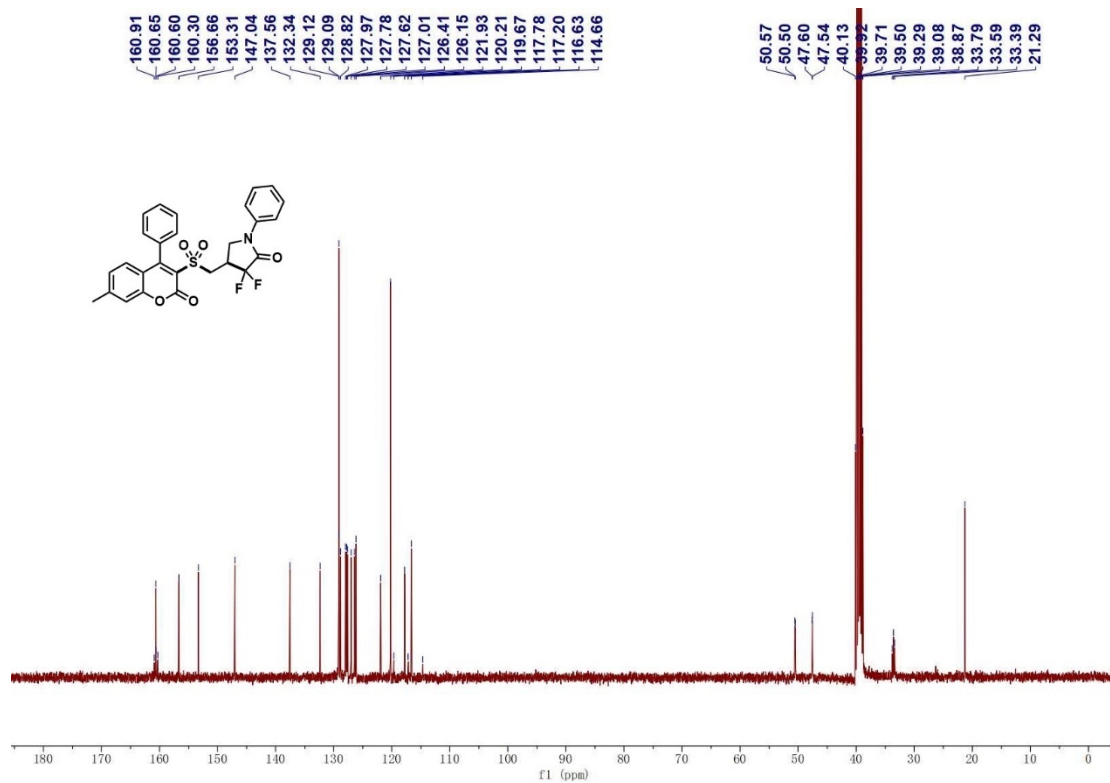

<sup>19</sup>F NMR-spectrum (376 MHz, DMSO-*d*<sub>6</sub>) of 4ea

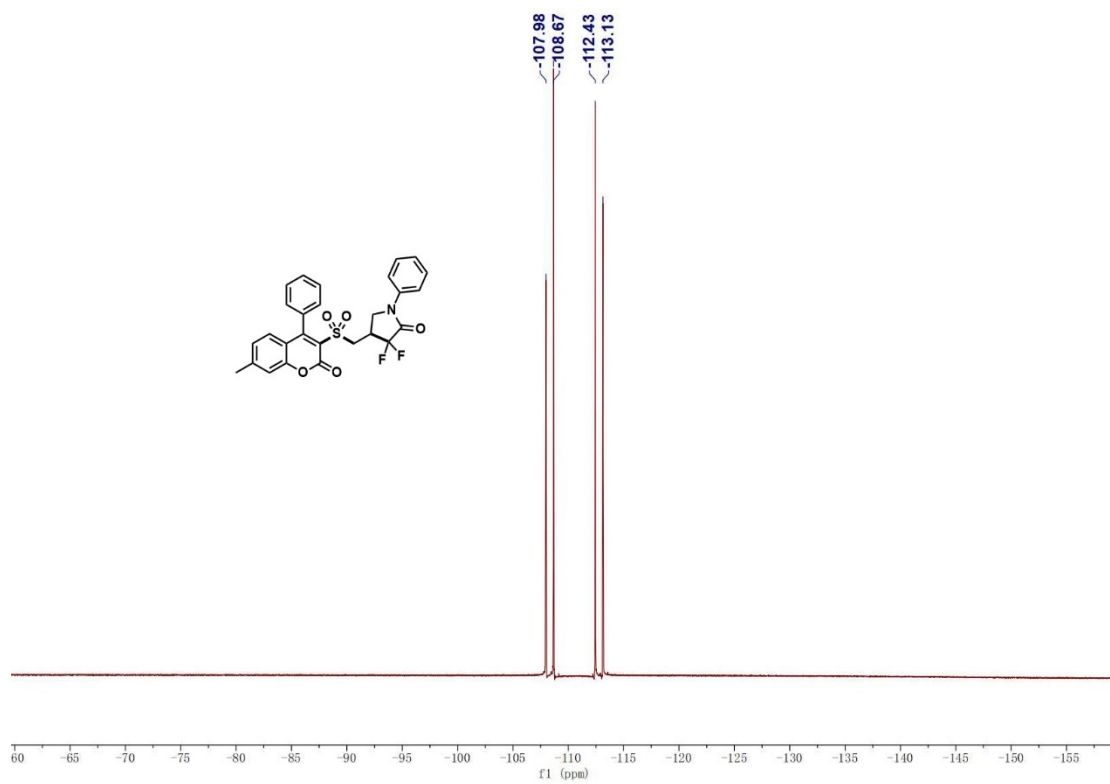

<sup>1</sup>H NMR-spectrum (400 MHz, DMSO-*d*<sub>6</sub>) of 4fa

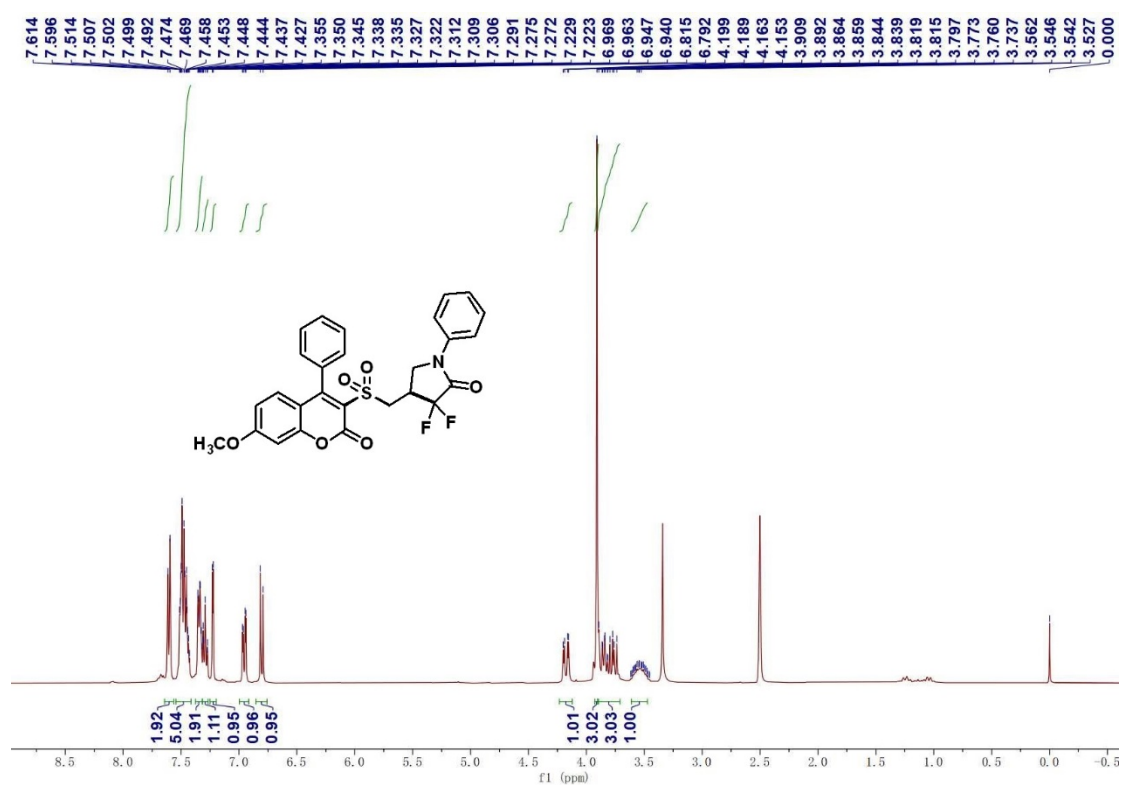

<sup>13</sup>C NMR-spectrum (101 MHz, DMSO-*d*<sub>6</sub>) of 4fa

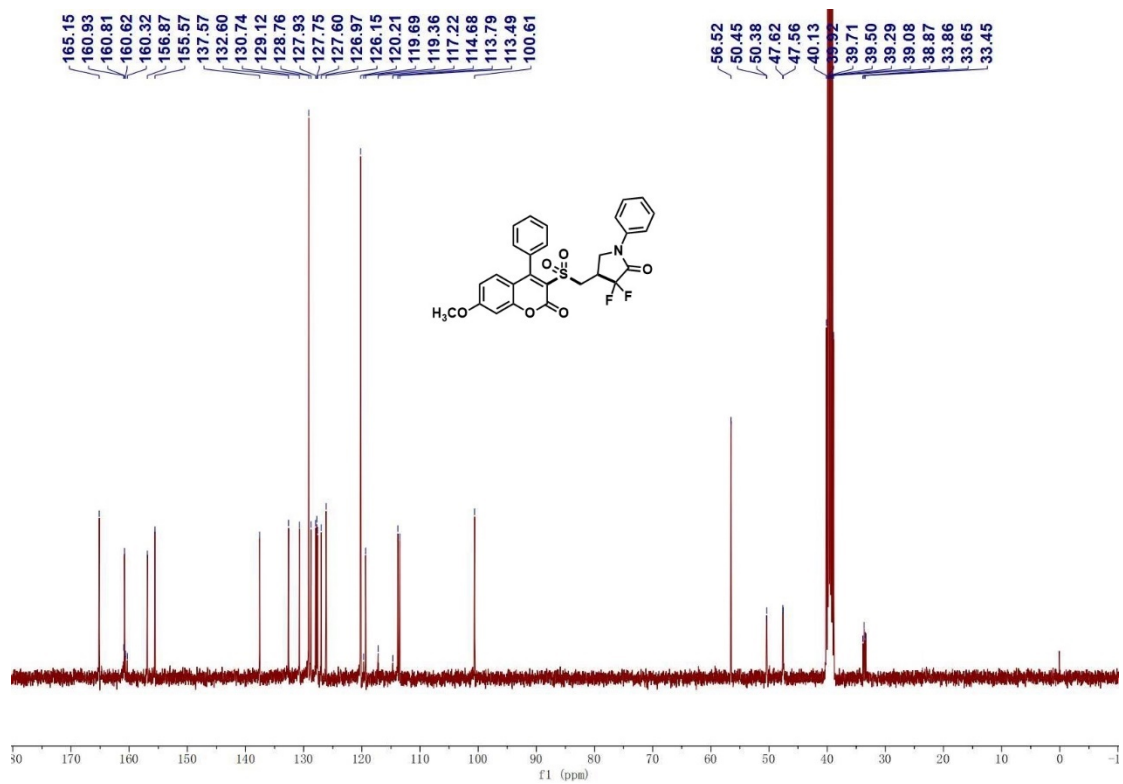



<sup>19</sup>F NMR-spectrum (376 MHz, DMSO-*d*<sub>6</sub>) of **4fa**

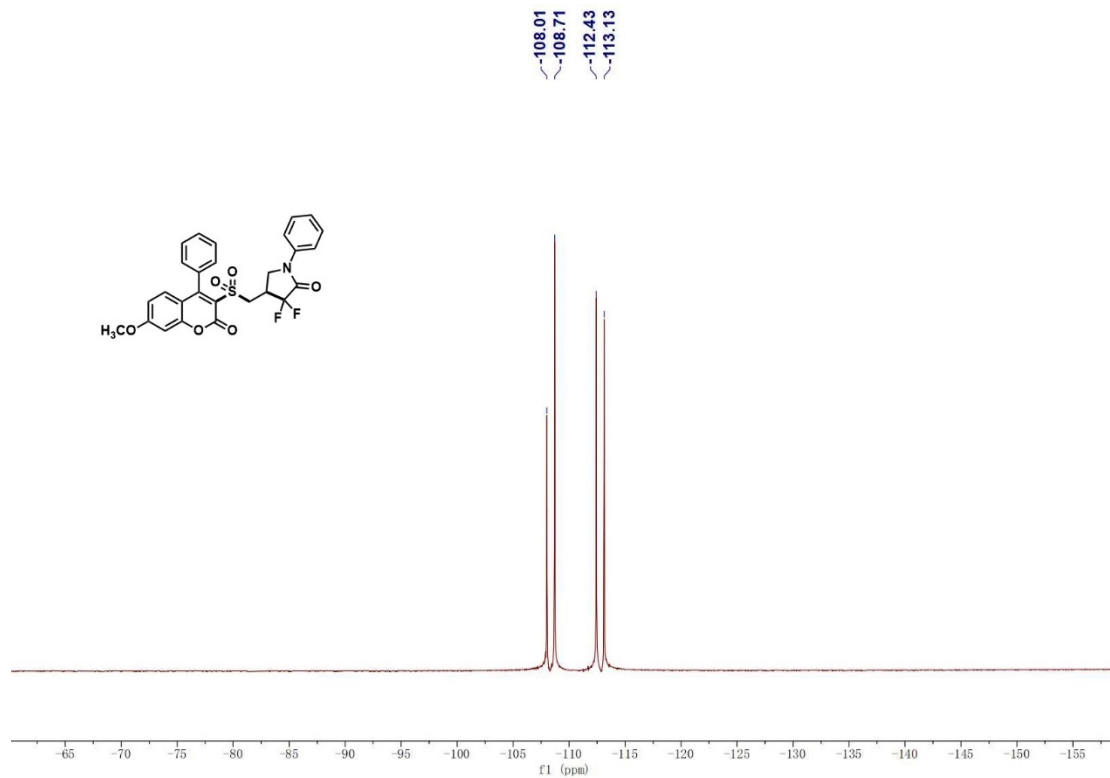

<sup>1</sup>H NMR-spectrum (400 MHz, DMSO-*d*<sub>6</sub>) of **4ga**

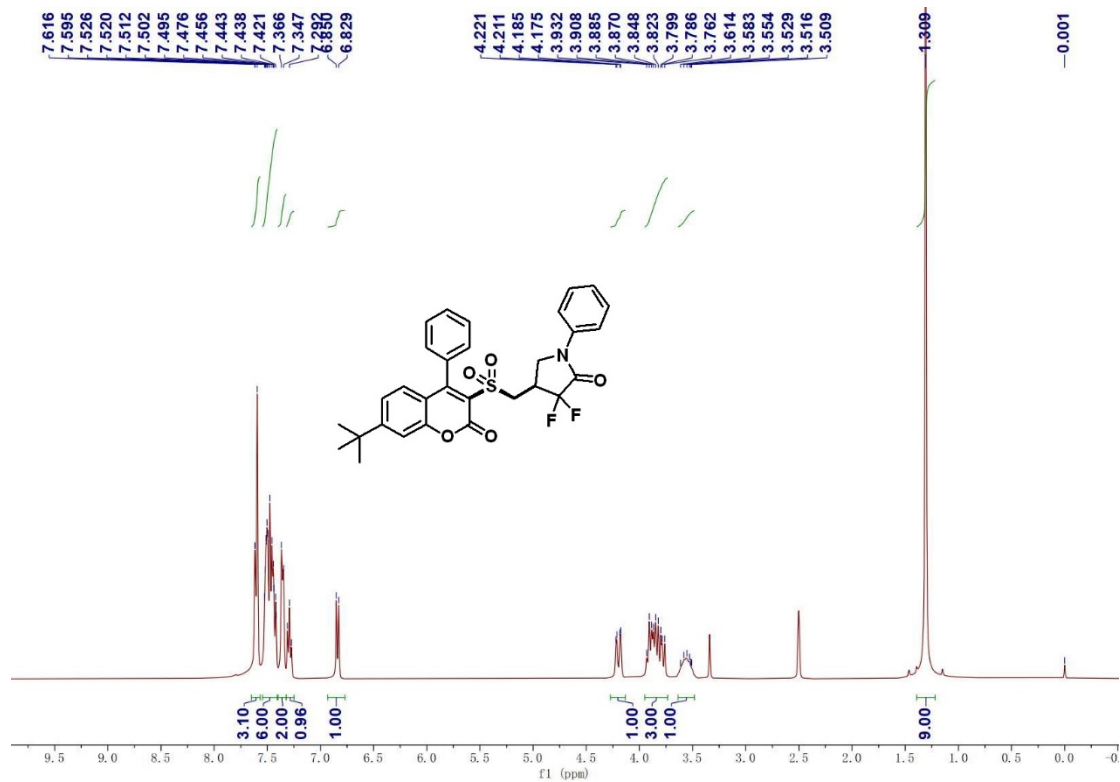

<sup>13</sup>C NMR-spectrum (101 MHz, DMSO-*d*<sub>6</sub>) of **4ga**

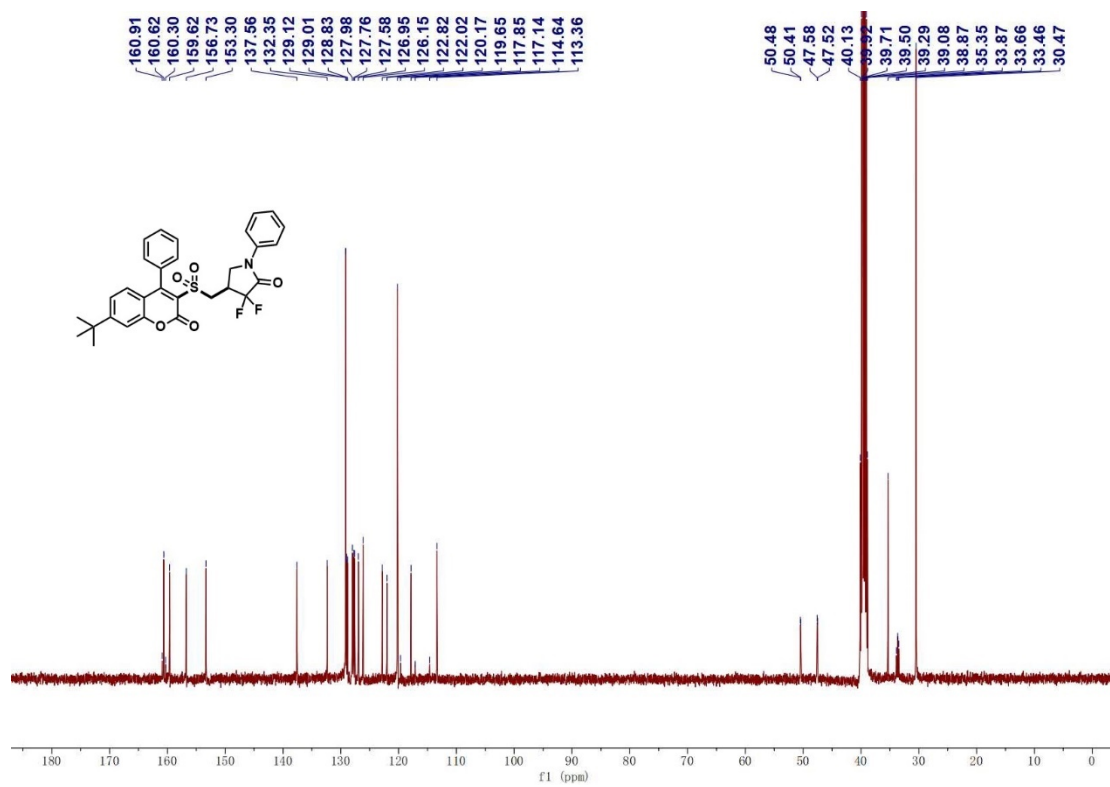

<sup>19</sup>F NMR-spectrum (376 MHz, DMSO-*d*<sub>6</sub>) of **4ga**

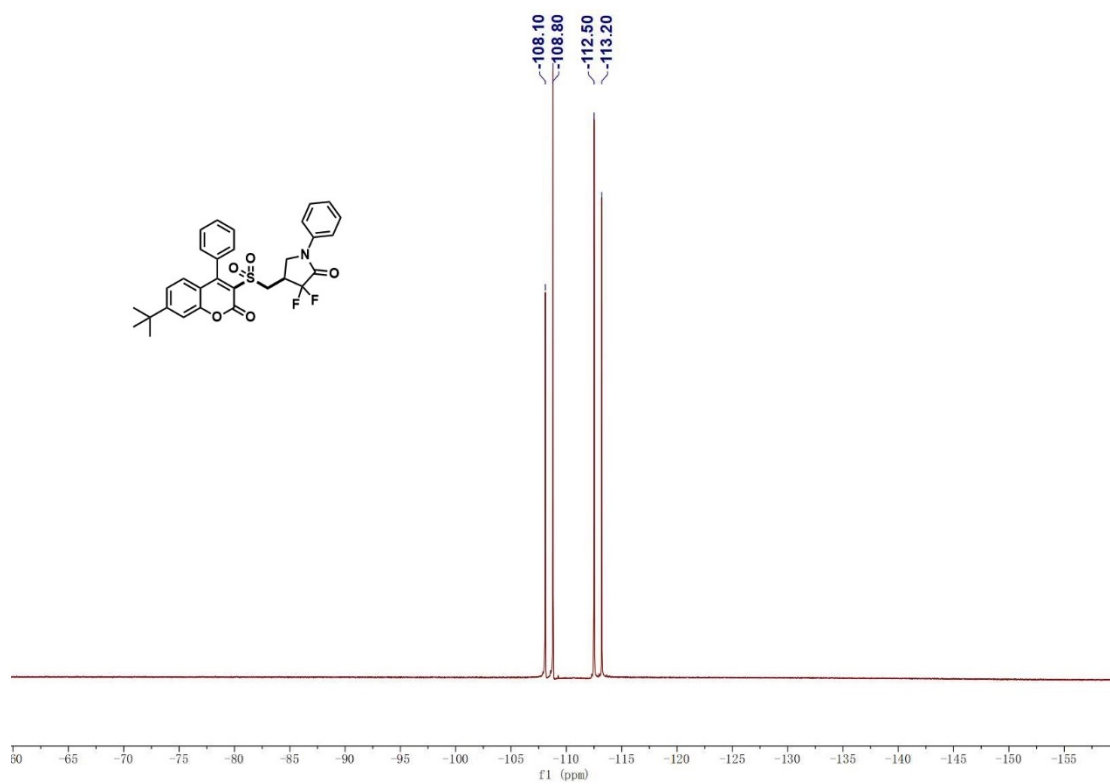

<sup>1</sup>H NMR-spectrum (400 MHz, DMSO-d<sub>6</sub>) of **4ha**

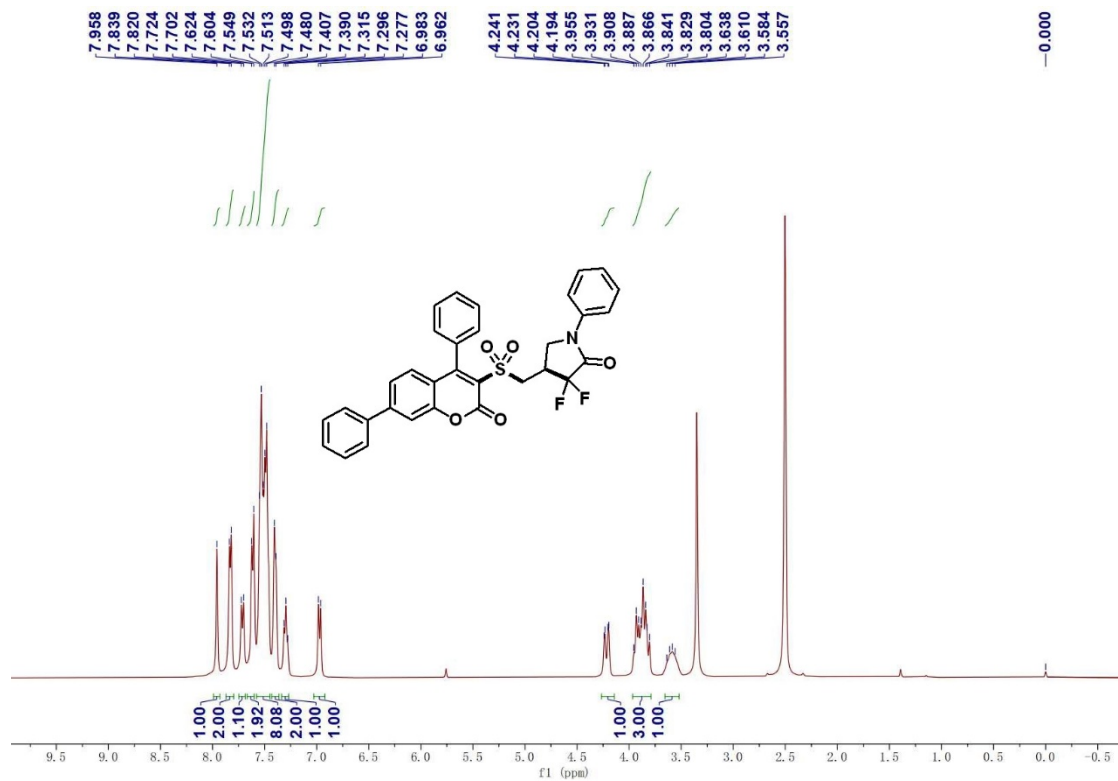

<sup>13</sup>C NMR-spectrum (101 MHz, DMSO-d<sub>6</sub>) of **4ha**

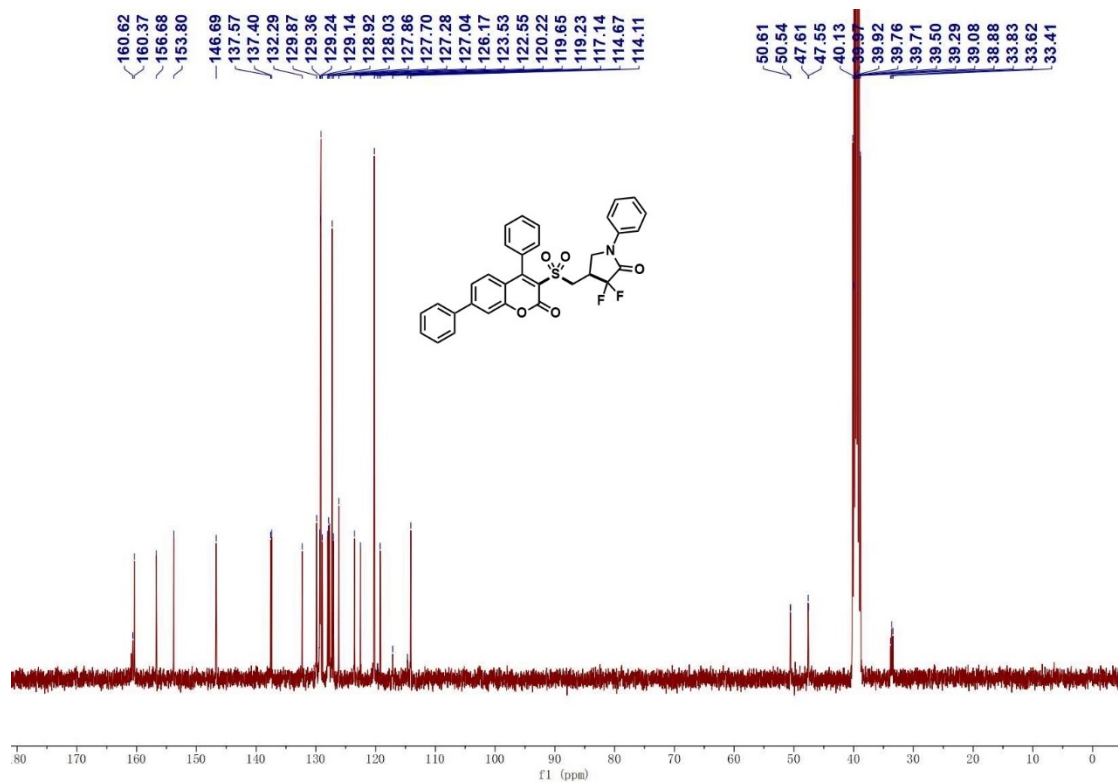

<sup>19</sup>F NMR-spectrum (376 MHz, DMSO-*d*<sub>6</sub>) of **4ha**

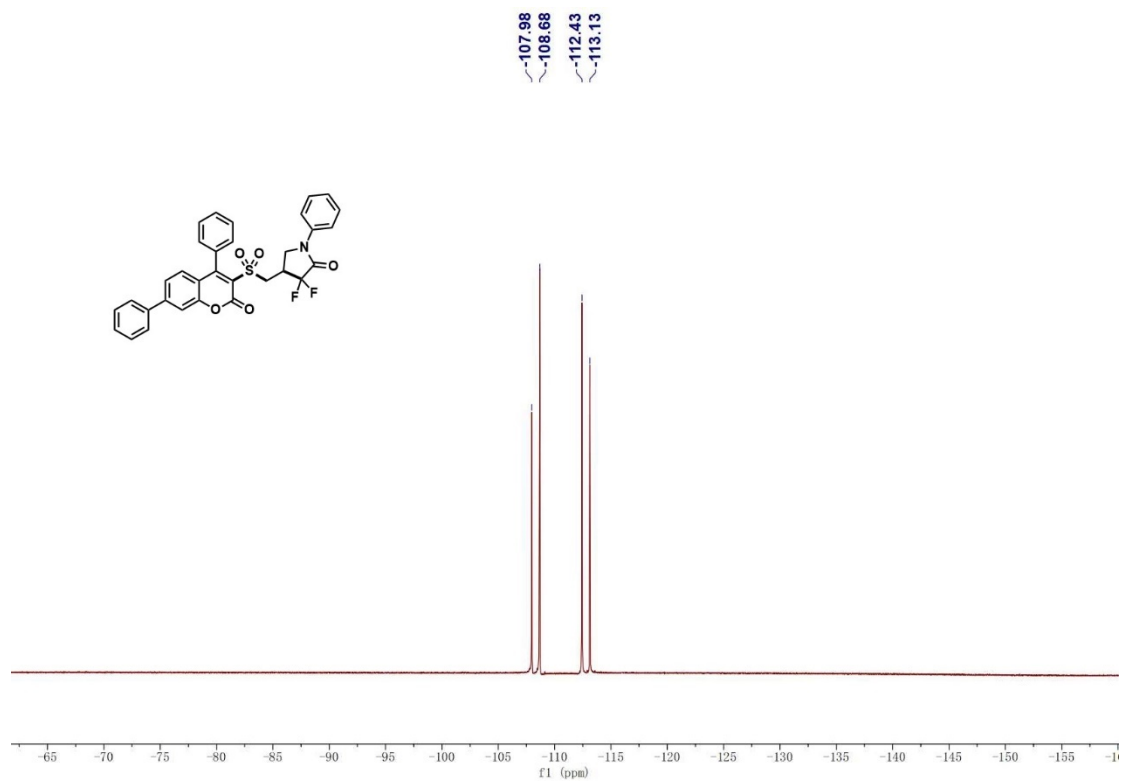

<sup>1</sup>H NMR-spectrum (400 MHz, DMSO-*d*<sub>6</sub>) of **4ia**

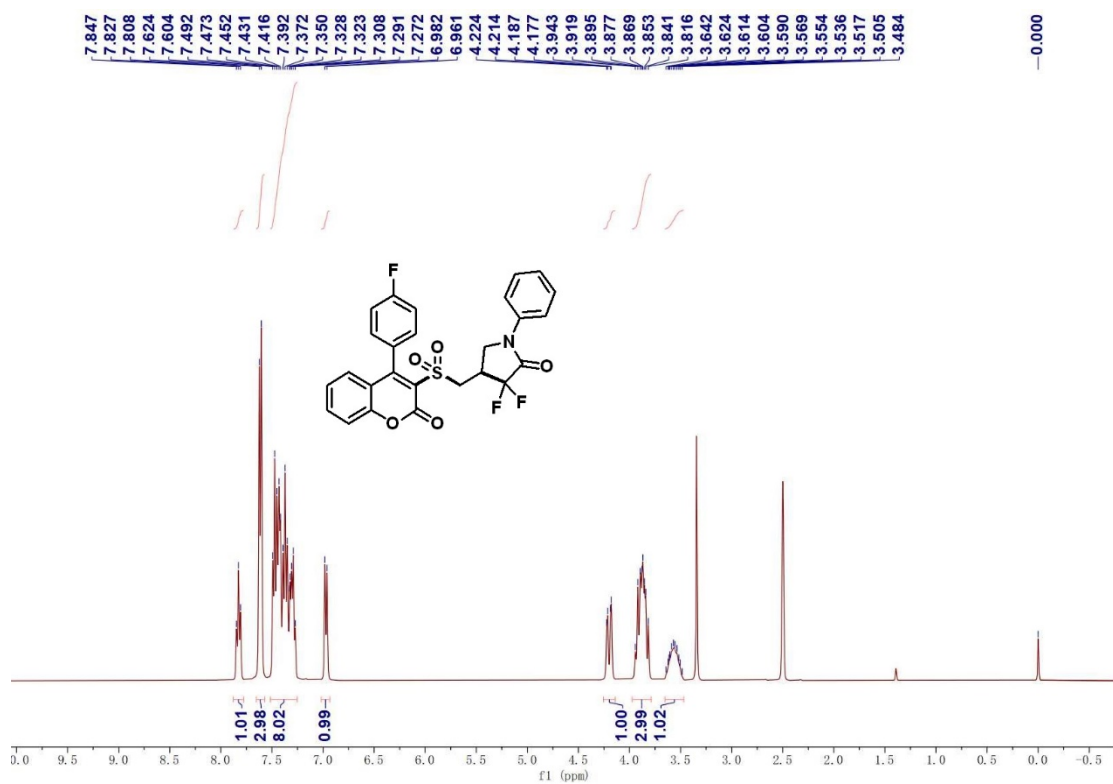

<sup>13</sup>C NMR-spectrum (101 MHz, DMSO-*d*<sub>6</sub>) of **4ia**

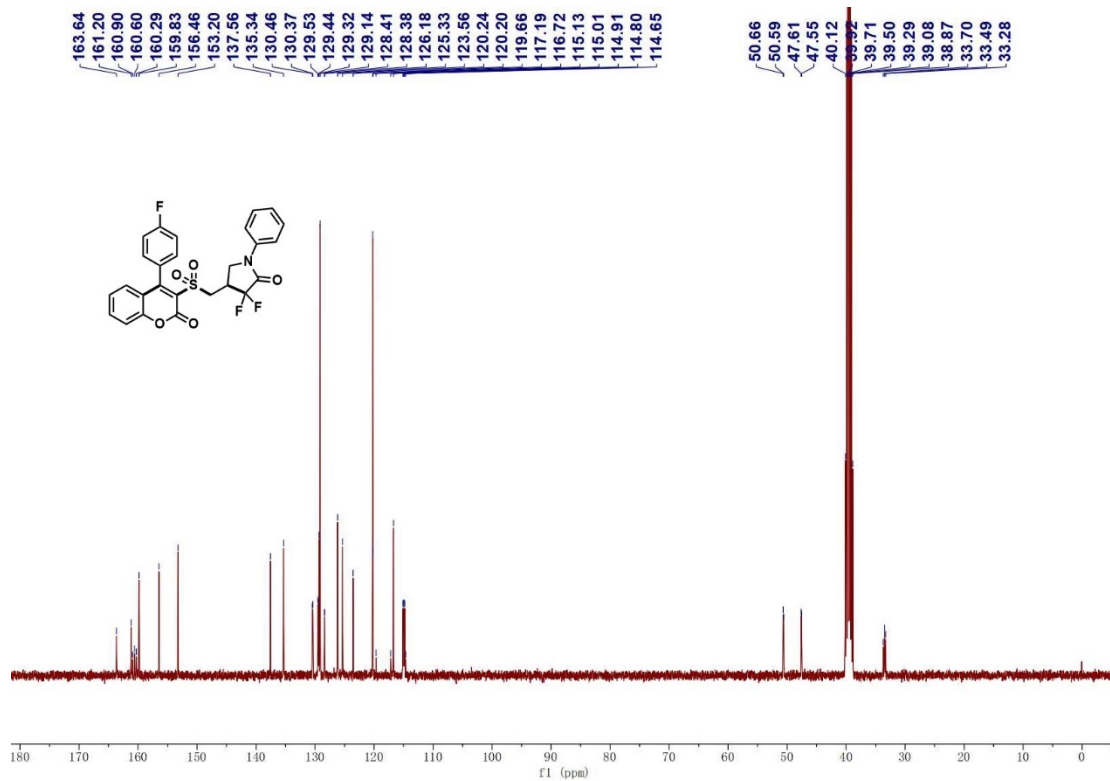

<sup>19</sup>F NMR-spectrum (376 MHz, DMSO-*d*<sub>6</sub>) of **4ia**

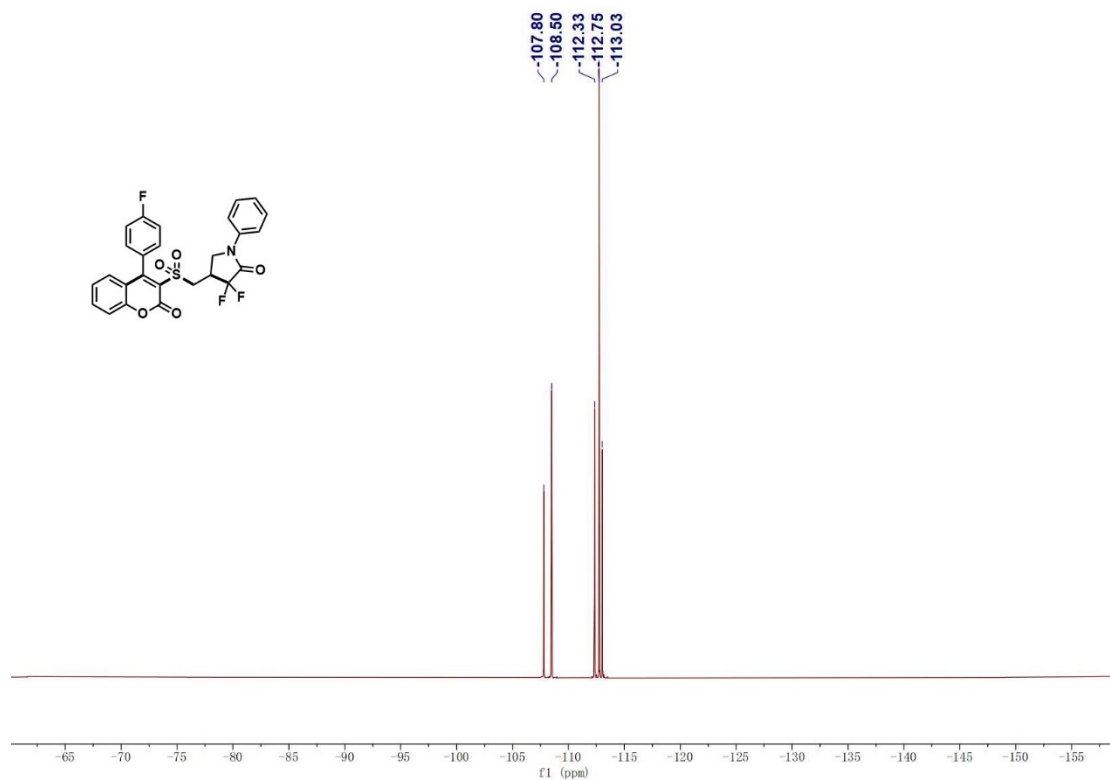

<sup>1</sup>H NMR-spectrum (400 MHz, DMSO-*d*<sub>6</sub>) of **4ja**

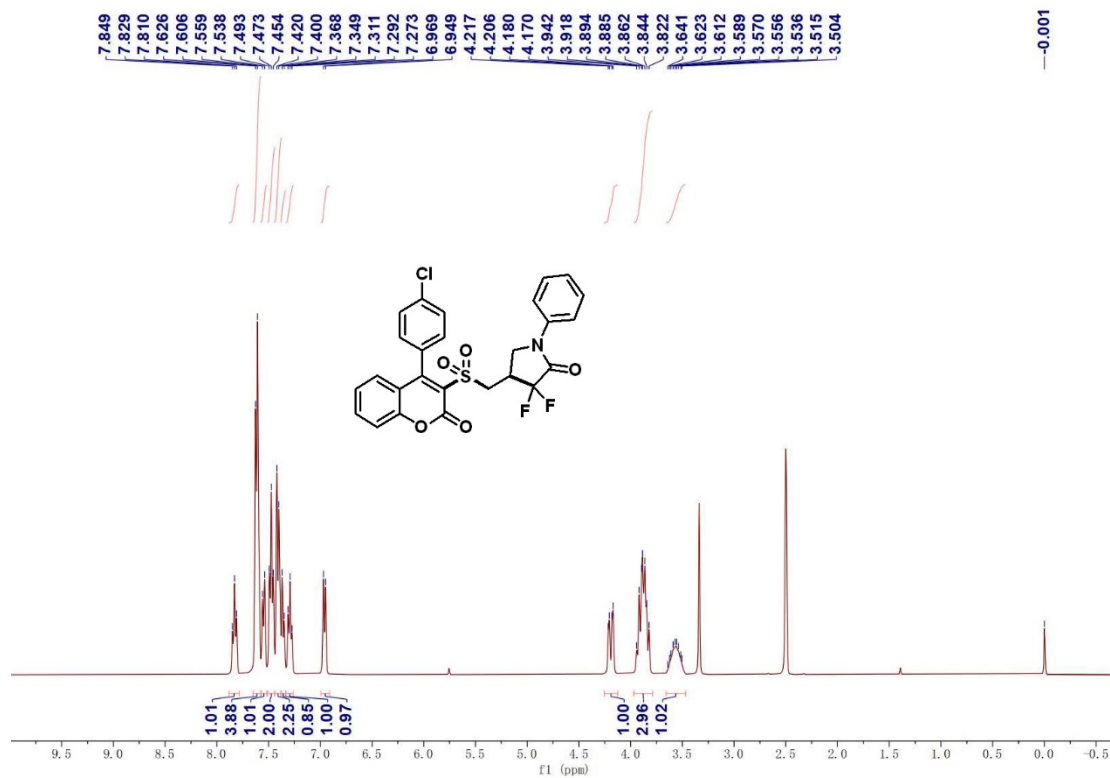

<sup>13</sup>C NMR-spectrum (101 MHz, DMSO-*d*<sub>6</sub>) of **4ja**

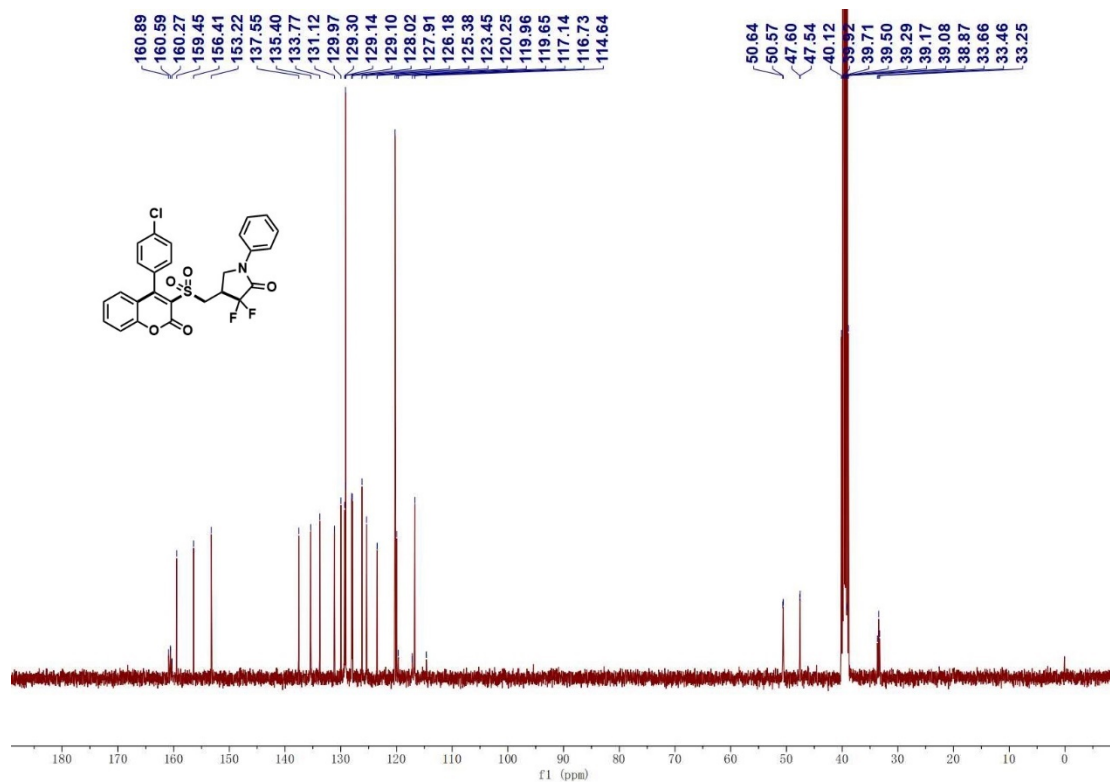

<sup>19</sup>F NMR-spectrum (376 MHz, DMSO-*d*<sub>6</sub>) of **4ja**

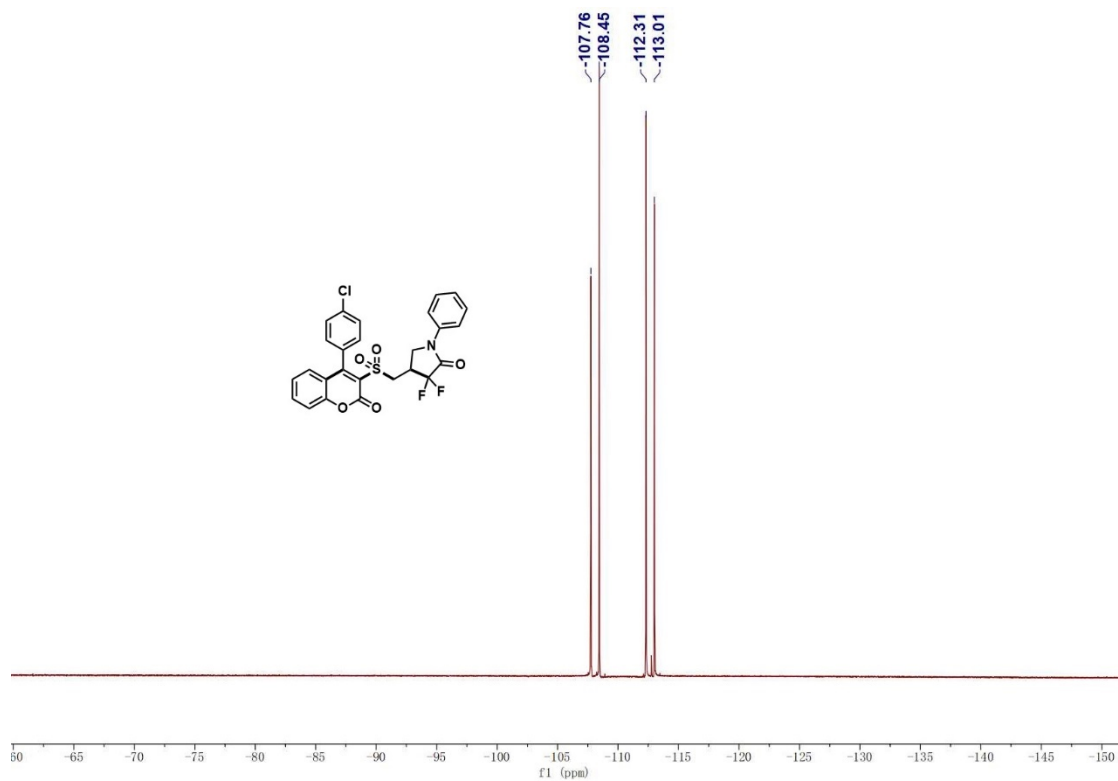

<sup>1</sup>H NMR-spectrum (400 MHz, DMSO-*d*<sub>6</sub>) of **4ka**

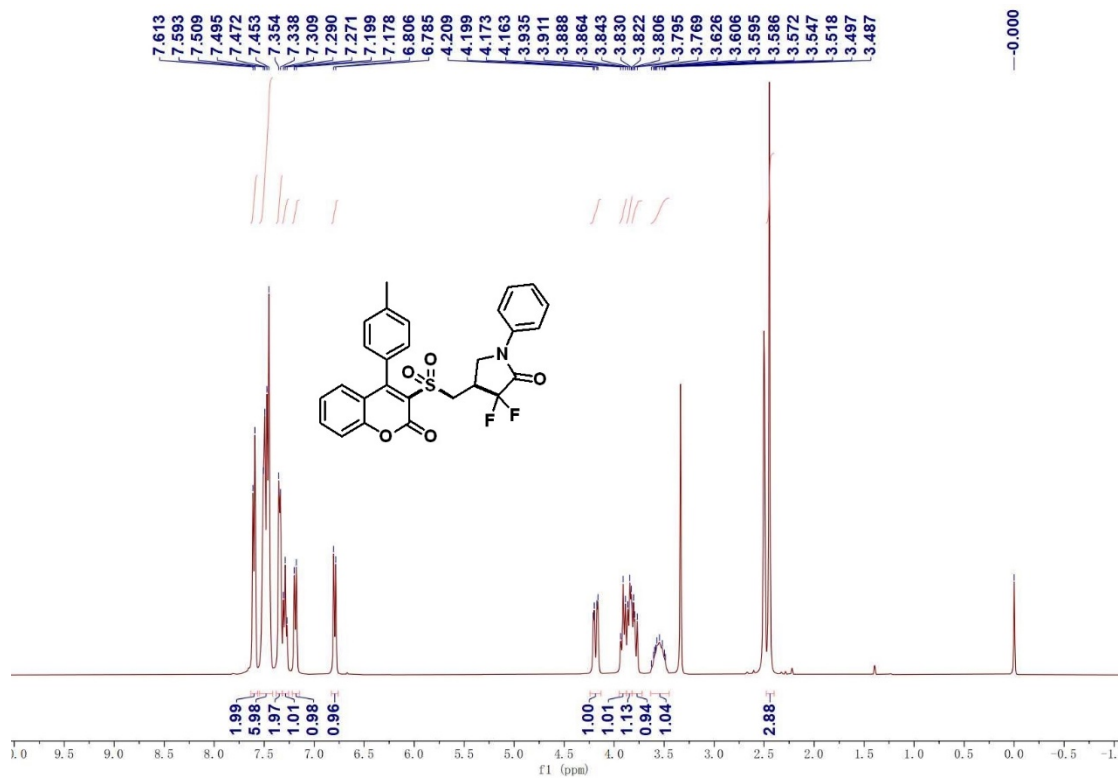

<sup>13</sup>C NMR-spectrum (101 MHz, DMSO-*d*<sub>6</sub>) of **4ka**

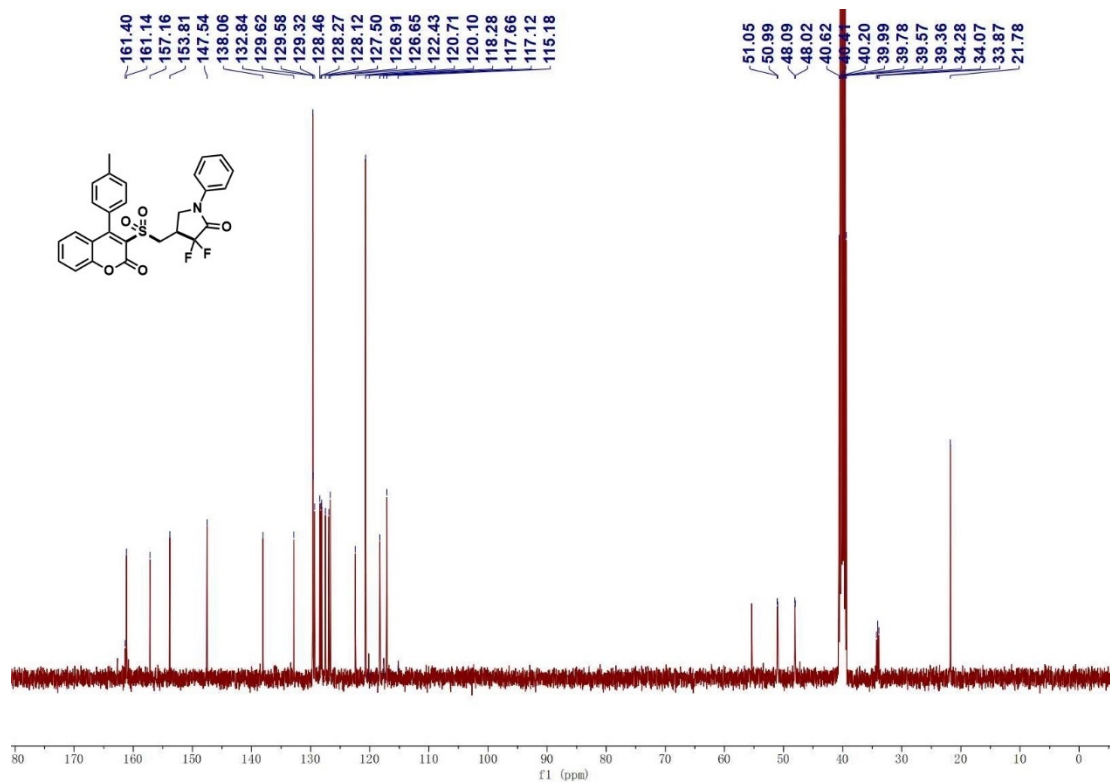

<sup>19</sup>F NMR-spectrum (376 MHz, DMSO-*d*<sub>6</sub>) of **4ka**



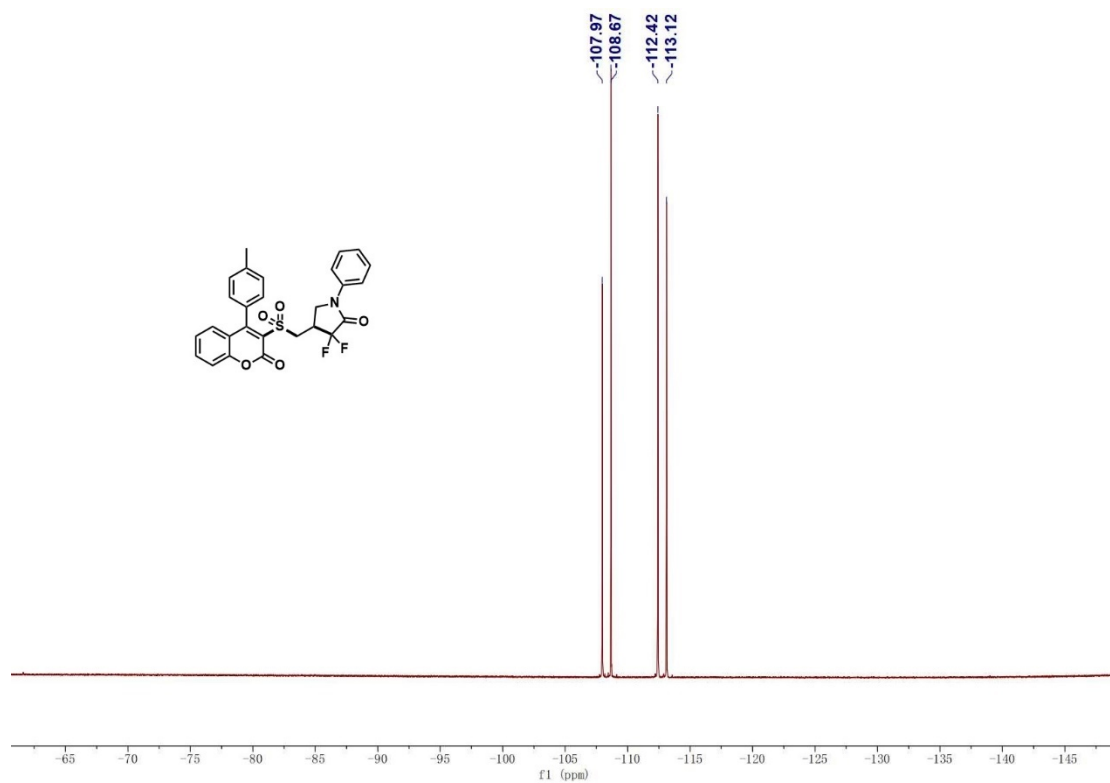

<sup>1</sup>H NMR-spectrum (400 MHz, DMSO-*d*<sub>6</sub>) of 4l*a* and 4l'*a*

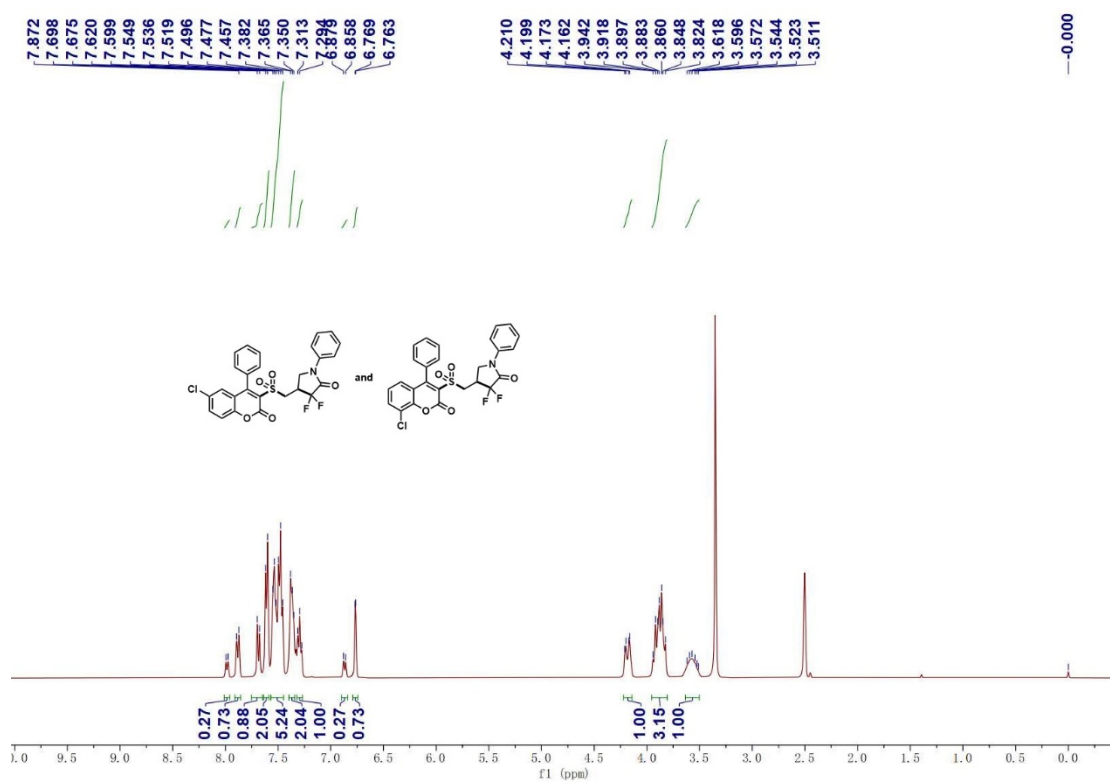

<sup>13</sup>C NMR-spectrum (101 MHz, DMSO-*d*<sub>6</sub>) of 4l*a* and 4l'*a*

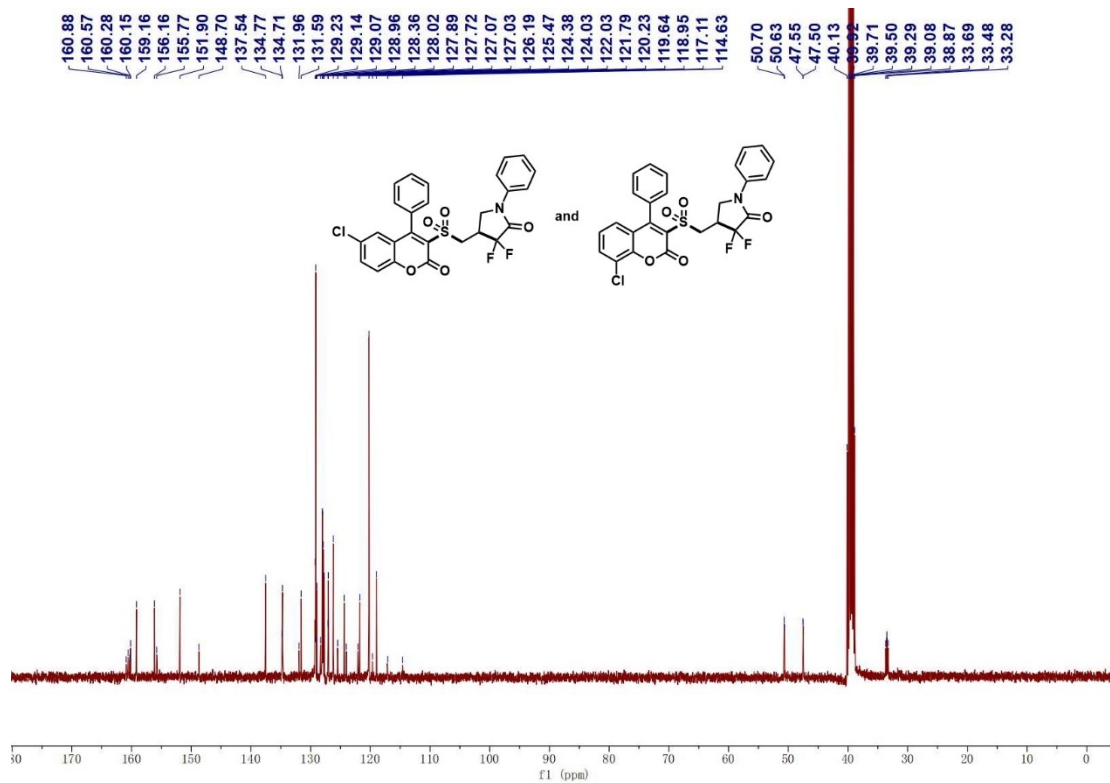

<sup>19</sup>F NMR-spectrum (376 MHz, DMSO-*d*<sub>6</sub>) of **4la** and **4l'a**

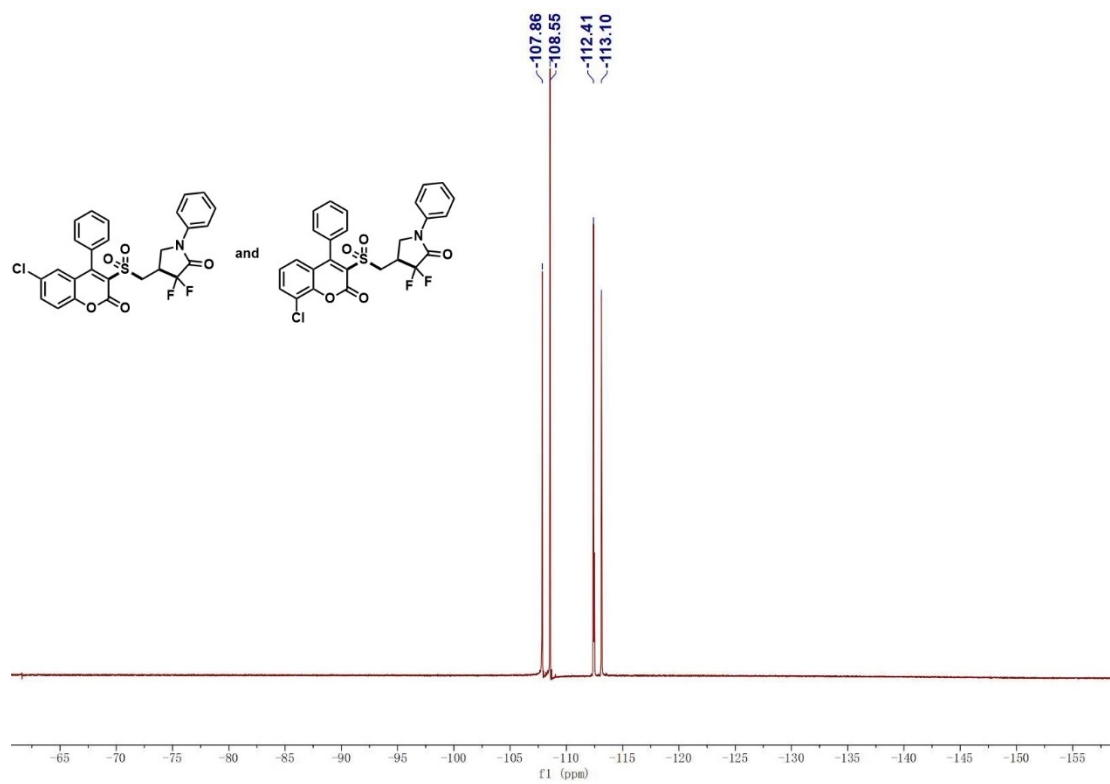

<sup>1</sup>H NMR-spectrum (400 MHz, DMSO-d<sub>6</sub>) of 4ma

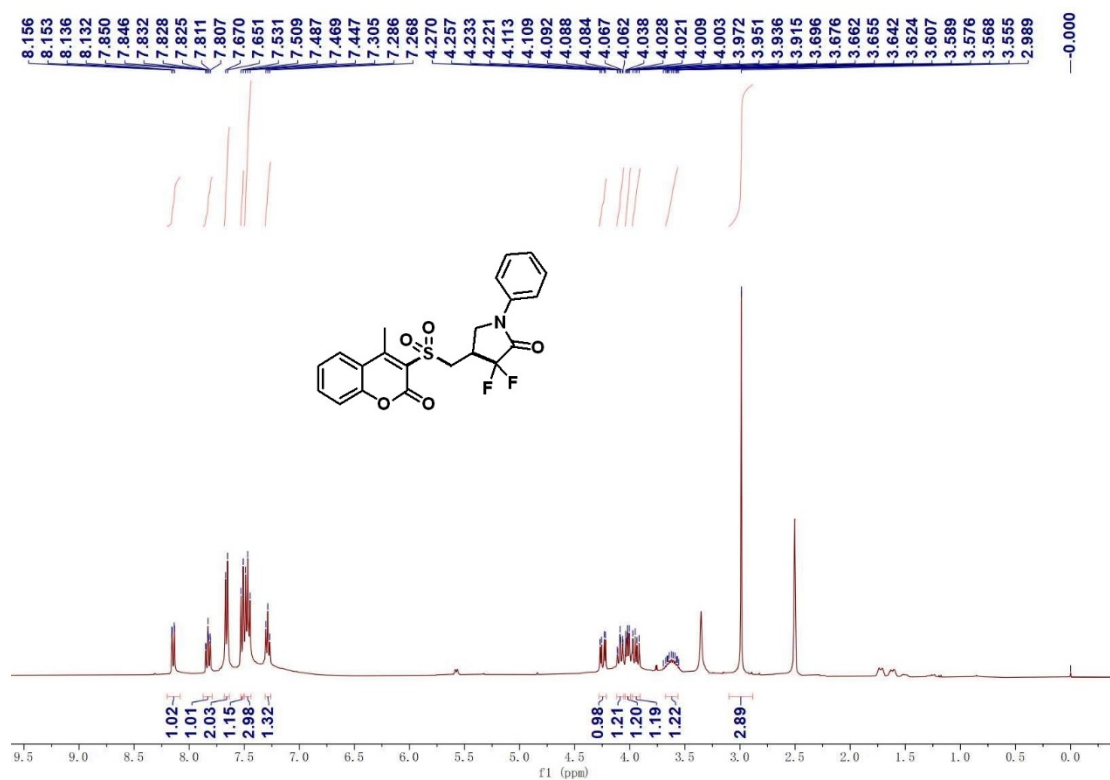

<sup>13</sup>C NMR-spectrum (101 MHz, DMSO-d<sub>6</sub>) of 4ma

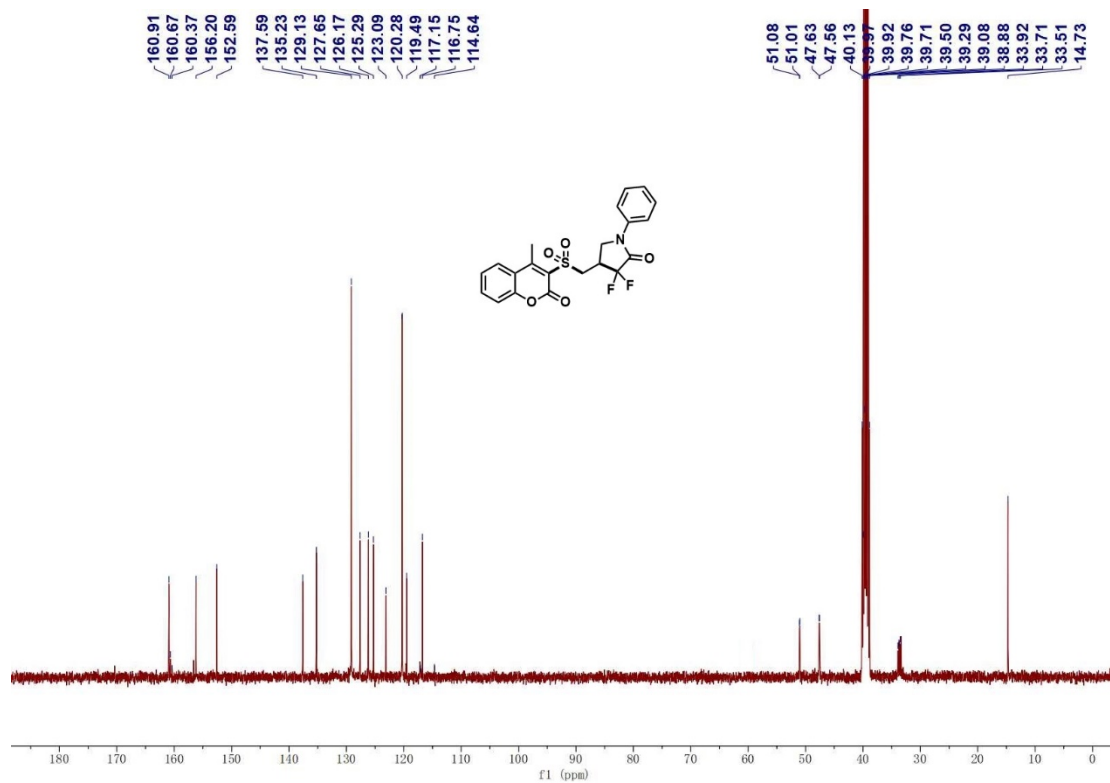

<sup>19</sup>F NMR-spectrum (376 MHz, DMSO-*d*<sub>6</sub>) of **4ma**

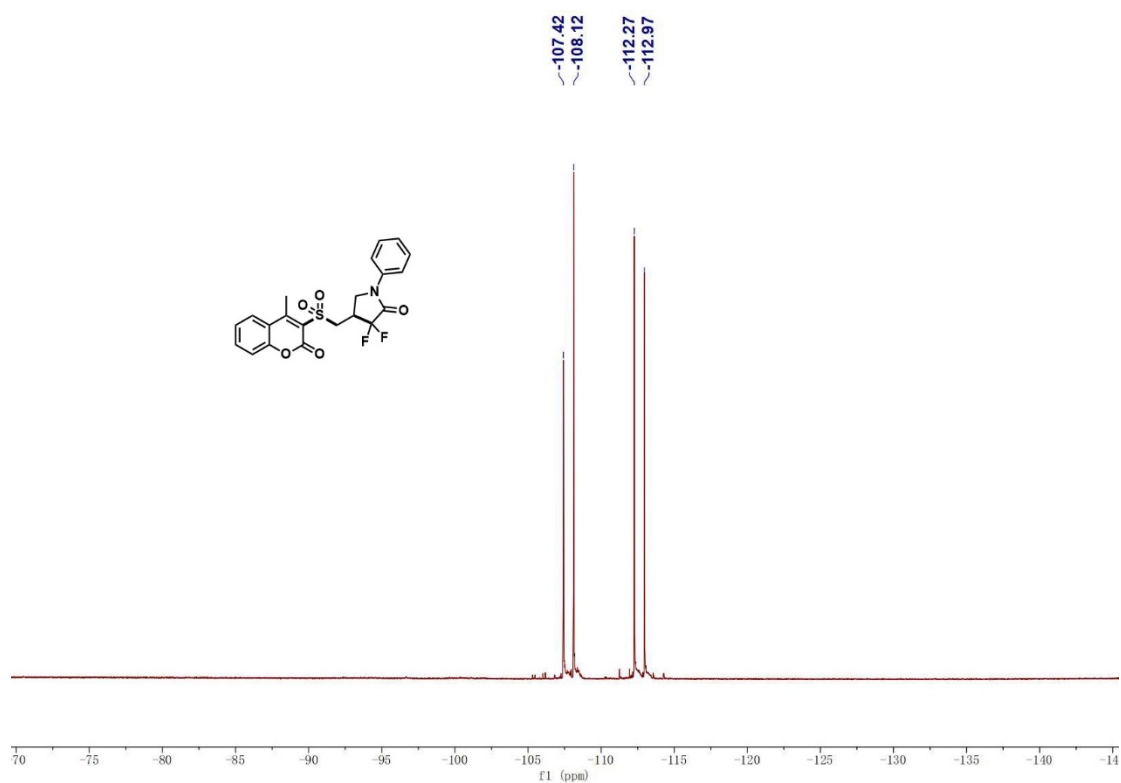

## 9.1 X-ray crystallography date of **3ac**.

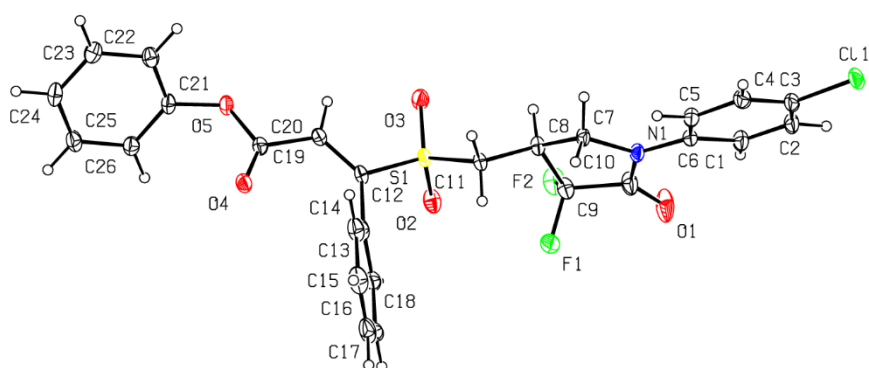

### Crystal structure determination of **3ac**.

Crystal Data for C<sub>26</sub>H<sub>20</sub>ClF<sub>2</sub>NO<sub>5</sub>S (*M* = 531.94 g/mol): triclinic, space group P-1 (no. 2), *a* = 6.3919(4) Å, *b* = 10.6731(6) Å, *c* = 18.7577(11) Å,  $\alpha$  = 73.689(2)°,  $\beta$  = 87.428(2)°,  $\gamma$  = 75.023(2)°, *V* = 1185.92(12) Å<sup>3</sup>, *Z* = 2, *T* = 170.00 K,  $\mu$ (GaK $\alpha$ ) = 1.799 mm<sup>-1</sup>, *D*<sub>calc</sub> = 1.490 g/cm<sup>3</sup>, 37998 reflections measured (7.752° ≤ 2 $\theta$  ≤ 114.212°), 4772 unique (*R*<sub>int</sub> = 0.0554, *R*<sub>sigma</sub> = 0.0415) which

were used in all calculations. The final  $R_1$  was 0.0798 ( $I > 2\sigma(I)$ ) and  $wR_2$  was 0.2236 (all data).

**Table 1 Crystal data and structure refinement for 3ac.**

|                                               |                                                               |
|-----------------------------------------------|---------------------------------------------------------------|
| Identification code                           | 3ac                                                           |
| Empirical formula                             | $C_{26}H_{20}ClF_2NO_5S$                                      |
| Formula weight                                | 531.94                                                        |
| Temperature/K                                 | 170.00                                                        |
| Crystal system                                | triclinic                                                     |
| Space group                                   | P-1                                                           |
| $a/\text{\AA}$                                | 6.3919(4)                                                     |
| $b/\text{\AA}$                                | 10.6731(6)                                                    |
| $c/\text{\AA}$                                | 18.7577(11)                                                   |
| $\alpha/^\circ$                               | 73.689(2)                                                     |
| $\beta/^\circ$                                | 87.428(2)                                                     |
| $\gamma/^\circ$                               | 75.023(2)                                                     |
| Volume/ $\text{\AA}^3$                        | 1185.92(12)                                                   |
| Z                                             | 2                                                             |
| $\rho_{\text{calc}}/\text{cm}^3$              | 1.490                                                         |
| $\mu/\text{mm}^{-1}$                          | 1.799                                                         |
| F(000)                                        | 548.0                                                         |
| Crystal size/ $\text{mm}^3$                   | $0.2 \times 0.03 \times 0.02$                                 |
| Radiation                                     | GaK $\alpha$ ( $\lambda = 1.34139$ )                          |
| $2\theta$ range for data collection/ $^\circ$ | 7.752 to 114.212                                              |
| Index ranges                                  | $-7 \leq h \leq 7, -13 \leq k \leq 13, -23 \leq l \leq 23$    |
| Reflections collected                         | 37998                                                         |
| Independent reflections                       | 4772 [ $R_{\text{int}} = 0.0554, R_{\text{sigma}} = 0.0415$ ] |
| Data/restraints/parameters                    | 4772/0/325                                                    |
| Goodness-of-fit on $F^2$                      | 1.125                                                         |
| Final R indexes [ $I \geq 2\sigma(I)$ ]       | $R_1 = 0.0798, wR_2 = 0.2190$                                 |
| Final R indexes [all data]                    | $R_1 = 0.0859, wR_2 = 0.2236$                                 |
| Largest diff. peak/hole / $e \text{\AA}^{-3}$ | 1.54/-0.52                                                    |

**Table 2 Fractional Atomic Coordinates ( $\times 10^4$ ) and Equivalent Isotropic Displacement Parameters ( $\text{\AA}^2 \times 10^3$ ) for 3ac.  $U_{\text{eq}}$  is defined as 1/3 of the trace of the orthogonalised  $U_{ij}$  tensor.**

| Atom | x            | y          | z           | $U_{\text{eq}}$ |
|------|--------------|------------|-------------|-----------------|
| Cl1  | -1142.0 (18) | 9783.9 (9) | 7618.8 (5)  | 45.8 (3)        |
| S1   | 4539.8 (13)  | 5374.5 (8) | 3097.4 (4)  | 25.4 (2)        |
| F1   | -535 (4)     | 7536 (3)   | 3387.0 (12) | 42.0 (6)        |
| O1   | -2901 (5)    | 7259 (5)   | 4781 (2)    | 71.7 (12)       |
| N1   | 420 (4)      | 7589 (3)   | 5008.1 (16) | 27.1 (6)        |
| C1   | -1845 (6)    | 8048 (4)   | 6043 (2)    | 34.8 (8)        |
| F2   | -332 (4)     | 5482 (3)   | 4048.8 (14) | 47.4 (6)        |
| O2   | 2566 (4)     | 5384 (3)   | 2768.9 (15) | 39.3 (6)        |
| C2   | -2183 (7)    | 8576 (4)   | 6648 (2)    | 39.3 (9)        |
| O3   | 5682 (5)     | 4151 (3)   | 3627.2 (15) | 40.8 (7)        |
| C3   | -713 (7)     | 9184 (4)   | 6830 (2)    | 36.3 (8)        |
| O4   | 9744 (4)     | 5952 (2)   | 1221.0 (13) | 33.1 (6)        |
| C4   | 1093 (6)     | 9305 (4)   | 6411 (2)    | 35.4 (8)        |
| O5   | 11074 (4)    | 3747 (2)   | 1836.1 (13) | 28.9 (5)        |
| C5   | 1422 (6)     | 8801 (4)   | 5795 (2)    | 31.4 (7)        |

|     |           |          |             |           |
|-----|-----------|----------|-------------|-----------|
| C6  | -26 (5)   | 8166 (3) | 5610.2 (18) | 27.9 (7)  |
| C7  | 2556 (5)  | 7424 (4) | 4670.3 (18) | 25.8 (7)  |
| C8  | 2583 (5)  | 6440 (4) | 4203.0 (19) | 27.4 (7)  |
| C9  | 220 (6)   | 6629 (4) | 4058 (2)    | 34.2 (8)  |
| C10 | -993 (6)  | 7189 (5) | 4668 (2)    | 39.7 (9)  |
| C11 | 4025 (5)  | 6705 (3) | 3530.9 (17) | 25.3 (7)  |
| C12 | 6321 (5)  | 5858 (3) | 2360.9 (17) | 25.0 (7)  |
| C13 | 5509 (6)  | 7223 (3) | 1837.7 (18) | 27.3 (7)  |
| C14 | 6736 (7)  | 8166 (4) | 1751 (2)    | 39.0 (9)  |
| C15 | 5992 (9)  | 9445 (4) | 1274 (3)    | 50.9 (12) |
| C16 | 4068 (9)  | 9793 (4) | 885 (2)     | 54.6 (13) |
| C17 | 2832 (8)  | 8884 (4) | 966 (2)     | 47.0 (11) |
| C18 | 3548 (6)  | 7588 (4) | 1444.5 (19) | 34.5 (8)  |
| C19 | 8150 (5)  | 4915 (3) | 2351.9 (18) | 26.0 (7)  |
| C20 | 9699 (5)  | 4990 (3) | 1733.7 (18) | 26.2 (7)  |
| C21 | 12755 (6) | 3582 (3) | 1330.2 (19) | 27.5 (7)  |
| C22 | 14842 (6) | 3265 (4) | 1606 (2)    | 31.6 (8)  |
| C23 | 16558 (6) | 3020 (4) | 1137 (2)    | 33.9 (8)  |
| C24 | 16149 (6) | 3092 (4) | 406 (2)     | 36.2 (8)  |
| C25 | 14038 (6) | 3411 (4) | 140 (2)     | 35.3 (8)  |
| C26 | 12313 (6) | 3655 (4) | 605 (2)     | 31.1 (7)  |

**Table 3 Anisotropic Displacement Parameters ( $\text{\AA}^2 \times 10^3$ ) for 3ac. The Anisotropic displacement factor exponent takes the form:  $-2\pi^2[h^2a^*2U_{11}+2hka^*b^*U_{12}+\dots]$ .**

| Atom | $U_{11}$  | $U_{22}$  | $U_{33}$  | $U_{23}$   | $U_{13}$  | $U_{12}$   |
|------|-----------|-----------|-----------|------------|-----------|------------|
| C11  | 71.2 (7)  | 34.2 (5)  | 24.8 (4)  | -14.0 (4)  | 9.5 (4)   | 4.2 (4)    |
| S1   | 31.0 (5)  | 24.4 (4)  | 21.8 (4)  | -8.5 (3)   | 8.3 (3)   | -8.0 (3)   |
| F1   | 35.7 (12) | 56.7 (14) | 32.8 (11) | -16.3 (10) | -3.1 (9)  | -5.6 (10)  |
| O1   | 29.7 (16) | 149 (4)   | 68 (2)    | -69 (2)    | 21.8 (15) | -39 (2)    |
| N1   | 20.9 (13) | 35.8 (15) | 26.4 (14) | -11.8 (12) | 7.4 (11)  | -8.0 (11)  |
| C1   | 31.4 (18) | 40 (2)    | 32.3 (18) | -12.0 (16) | 10.6 (14) | -7.6 (15)  |
| F2   | 49.1 (14) | 55.4 (15) | 55.5 (15) | -28.3 (12) | 13.3 (11) | -32.4 (12) |
| O2   | 40.3 (15) | 51.6 (16) | 37.6 (14) | -22.0 (13) | 12.7 (11) | -23.6 (13) |
| C2   | 41 (2)    | 39 (2)    | 29.1 (18) | -5.9 (16)  | 15.5 (15) | -1.0 (16)  |
| O3   | 49.0 (16) | 27.6 (13) | 33.0 (14) | 1.0 (11)   | 16.1 (12) | -0.3 (11)  |
| C3   | 47 (2)    | 29.4 (18) | 24.7 (17) | -8.7 (14)  | 6.0 (15)  | 4.8 (15)   |
| O4   | 39.9 (14) | 30.2 (13) | 25.1 (12) | -5.5 (10)  | 9.1 (10)  | -5.5 (10)  |
| C4   | 43 (2)    | 30.7 (18) | 30.8 (18) | -11.8 (15) | 1.9 (15)  | -3.5 (15)  |
| O5   | 33.2 (13) | 27.4 (12) | 26.7 (12) | -10.6 (10) | 10.8 (9)  | -6.8 (10)  |
| C5   | 30.4 (18) | 33.2 (18) | 29.7 (17) | -11.2 (14) | 6.8 (13)  | -5.0 (14)  |
| C6   | 28.3 (17) | 29.2 (17) | 22.0 (15) | -6.5 (13)  | 4.5 (12)  | -1.6 (13)  |
| C7   | 19.9 (15) | 36.2 (18) | 25.4 (16) | -13.6 (14) | 7.1 (12)  | -9.9 (13)  |
| C8   | 27.4 (17) | 32.6 (17) | 25.8 (16) | -12.5 (13) | 7.9 (13)  | -10.2 (13) |
| C9   | 34.1 (19) | 46 (2)    | 30.8 (18) | -17.6 (16) | 7.4 (14)  | -18.3 (16) |
| C10  | 30.4 (19) | 63 (3)    | 35 (2)    | -24.5 (19) | 10.8 (15) | -18.6 (18) |
| C11  | 27.6 (16) | 31.0 (17) | 20.8 (15) | -11.6 (13) | 6.6 (12)  | -9.9 (13)  |
| C12  | 32.0 (17) | 27.8 (16) | 19.5 (14) | -11.2 (12) | 7.2 (12)  | -11.2 (13) |
| C13  | 37.1 (18) | 25.8 (16) | 20.7 (15) | -11.7 (13) | 11.4 (13) | -7.3 (13)  |
| C14  | 55 (2)    | 34.2 (19) | 34.5 (19) | -16.5 (16) | 16.8 (17) | -17.2 (17) |
| C15  | 79 (3)    | 30 (2)    | 46 (2)    | -12.6 (18) | 26 (2)    | -20 (2)    |
| C16  | 91 (4)    | 25.6 (19) | 34 (2)    | -5.5 (16)  | 25 (2)    | 1 (2)      |

**Table 3 Anisotropic Displacement Parameters ( $\text{\AA}^2 \times 10^3$ ) for 3ac. The Anisotropic displacement factor exponent takes the form:  $-2\pi^2[h^2a^*2U_{11}+2hka^*b^*U_{12}+\dots]$ .**

| Atom | $U_{11}$  | $U_{22}$  | $U_{33}$  | $U_{23}$   | $U_{13}$  | $U_{12}$   |
|------|-----------|-----------|-----------|------------|-----------|------------|
| C17  | 66 (3)    | 37 (2)    | 22.5 (17) | -7.2 (15)  | 4.5 (17)  | 11.1 (19)  |
| C18  | 42 (2)    | 32.9 (18) | 25.1 (17) | -10.6 (14) | 6.2 (14)  | -2.6 (15)  |
| C19  | 30.6 (17) | 27.7 (16) | 20.4 (15) | -7.4 (12)  | 4.6 (12)  | -8.5 (13)  |
| C20  | 27.8 (17) | 29.5 (16) | 24.1 (16) | -11.7 (13) | 3.7 (12)  | -7.9 (13)  |
| C21  | 32.0 (18) | 24.0 (16) | 29.5 (17) | -12.2 (13) | 11.6 (13) | -9.2 (13)  |
| C22  | 37.6 (19) | 29.9 (17) | 31.4 (18) | -13.5 (14) | 6.2 (14)  | -11.3 (14) |
| C23  | 29.5 (18) | 32.8 (18) | 43 (2)    | -15.2 (16) | 7.0 (15)  | -10.0 (14) |
| C24  | 38 (2)    | 32.8 (19) | 42 (2)    | -19.0 (16) | 17.9 (16) | -10.9 (15) |
| C25  | 45 (2)    | 35.7 (19) | 28.9 (18) | -16.1 (15) | 9.1 (15)  | -9.9 (16)  |
| C26  | 32.3 (18) | 30.5 (18) | 31.2 (18) | -11.8 (14) | 5.5 (14)  | -6.4 (14)  |

**Table 4 Bond Lengths for 3ac.**

| Atom | Atom | Length/ $\text{\AA}$ | Atom | Atom | Length/ $\text{\AA}$ |
|------|------|----------------------|------|------|----------------------|
| C11  | C3   | 1.756 (4)            | C7   | C8   | 1.541 (5)            |
| S1   | O2   | 1.426 (3)            | C8   | C9   | 1.498 (5)            |
| S1   | O3   | 1.438 (3)            | C8   | C11  | 1.533 (4)            |
| S1   | C11  | 1.780 (3)            | C9   | C10  | 1.528 (5)            |
| S1   | C12  | 1.798 (3)            | C12  | C13  | 1.486 (5)            |
| F1   | C9   | 1.372 (4)            | C12  | C19  | 1.334 (5)            |
| O1   | C10  | 1.215 (5)            | C13  | C14  | 1.399 (5)            |
| N1   | C6   | 1.417 (4)            | C13  | C18  | 1.391 (5)            |
| N1   | C7   | 1.469 (4)            | C14  | C15  | 1.381 (6)            |
| N1   | C10  | 1.345 (5)            | C15  | C16  | 1.370 (8)            |
| C1   | C2   | 1.389 (5)            | C16  | C17  | 1.376 (7)            |
| C1   | C6   | 1.400 (5)            | C17  | C18  | 1.393 (5)            |
| F2   | C9   | 1.363 (4)            | C19  | C20  | 1.489 (4)            |
| C2   | C3   | 1.374 (6)            | C21  | C22  | 1.376 (5)            |
| C3   | C4   | 1.380 (6)            | C21  | C26  | 1.379 (5)            |
| O4   | C20  | 1.199 (4)            | C22  | C23  | 1.392 (5)            |
| C4   | C5   | 1.391 (5)            | C23  | C24  | 1.385 (6)            |
| O5   | C20  | 1.356 (4)            | C24  | C25  | 1.383 (6)            |
| O5   | C21  | 1.411 (4)            | C25  | C26  | 1.392 (5)            |
| C5   | C6   | 1.386 (5)            |      |      |                      |

**Table 5 Bond Angles for 3ac.**

| Atom | Atom | Atom | Angle/ $^\circ$ | Atom | Atom | Atom | Angle/ $^\circ$ |
|------|------|------|-----------------|------|------|------|-----------------|
| O2   | S1   | O3   | 118.11 (18)     | C8   | C9   | C10  | 106.6 (3)       |
| O2   | S1   | C11  | 108.77 (16)     | O1   | C10  | N1   | 129.5 (4)       |
| O2   | S1   | C12  | 108.00 (15)     | O1   | C10  | C9   | 123.3 (4)       |
| O3   | S1   | C11  | 108.15 (16)     | N1   | C10  | C9   | 107.2 (3)       |
| O3   | S1   | C12  | 109.11 (16)     | C8   | C11  | S1   | 111.5 (2)       |
| C11  | S1   | C12  | 103.78 (15)     | C13  | C12  | S1   | 115.5 (2)       |
| C6   | N1   | C7   | 121.0 (3)       | C19  | C12  | S1   | 114.9 (2)       |
| C10  | N1   | C6   | 126.1 (3)       | C19  | C12  | C13  | 129.6 (3)       |
| C10  | N1   | C7   | 112.9 (3)       | C14  | C13  | C12  | 118.9 (3)       |
| C2   | C1   | C6   | 119.6 (4)       | C18  | C13  | C12  | 121.5 (3)       |

**Table 5 Bond Angles for 3ac.**

| Atom | Atom | Atom | Angle/°   | Atom | Atom | Atom | Angle/°   |
|------|------|------|-----------|------|------|------|-----------|
| C3   | C2   | C1   | 120.0 (3) | C18  | C13  | C14  | 119.6 (3) |
| C2   | C3   | C11  | 118.7 (3) | C15  | C14  | C13  | 119.6 (4) |
| C2   | C3   | C4   | 121.1 (3) | C16  | C15  | C14  | 120.4 (4) |
| C4   | C3   | C11  | 120.1 (3) | C15  | C16  | C17  | 120.8 (4) |
| C3   | C4   | C5   | 119.2 (4) | C16  | C17  | C18  | 119.8 (4) |
| C20  | O5   | C21  | 118.2 (3) | C13  | C18  | C17  | 119.7 (4) |
| C6   | C5   | C4   | 120.5 (3) | C12  | C19  | C20  | 124.6 (3) |
| C1   | C6   | N1   | 121.1 (3) | O4   | C20  | O5   | 124.6 (3) |
| C5   | C6   | N1   | 119.3 (3) | O4   | C20  | C19  | 127.6 (3) |
| C5   | C6   | C1   | 119.5 (3) | O5   | C20  | C19  | 107.8 (3) |
| N1   | C7   | C8   | 104.5 (3) | C22  | C21  | O5   | 117.0 (3) |
| C9   | C8   | C7   | 102.6 (3) | C22  | C21  | C26  | 121.9 (3) |
| C9   | C8   | C11  | 117.8 (3) | C26  | C21  | O5   | 121.0 (3) |
| C11  | C8   | C7   | 110.8 (3) | C21  | C22  | C23  | 119.0 (3) |
| F1   | C9   | C8   | 113.2 (3) | C24  | C23  | C22  | 120.0 (4) |
| F1   | C9   | C10  | 107.7 (3) | C25  | C24  | C23  | 120.1 (3) |
| F2   | C9   | F1   | 104.9 (3) | C24  | C25  | C26  | 120.3 (3) |
| F2   | C9   | C8   | 114.6 (3) | C21  | C26  | C25  | 118.7 (3) |
| F2   | C9   | C10  | 109.7 (3) |      |      |      |           |

**Table 6 Torsion Angles for 3ac.**

| A   | B   | C   | D   | Angle/°    | A   | B   | C   | D   | Angle/°    |
|-----|-----|-----|-----|------------|-----|-----|-----|-----|------------|
| C11 | C3  | C4  | C5  | 178.8 (3)  | C7  | C8  | C11 | S1  | 167.7 (2)  |
| S1  | C12 | C13 | C14 | 121.7 (3)  | C8  | C9  | C10 | O1  | -168.2 (5) |
| S1  | C12 | C13 | C18 | -57.3 (4)  | C8  | C9  | C10 | N1  | 13.4 (4)   |
| S1  | C12 | C19 | C20 | 169.7 (3)  | C9  | C8  | C11 | S1  | -74.7 (3)  |
| F1  | C9  | C10 | O1  | 70.1 (6)   | C10 | N1  | C6  | C1  | 17.5 (6)   |
| F1  | C9  | C10 | N1  | -108.4 (3) | C10 | N1  | C6  | C5  | -165.7 (4) |
| N1  | C7  | C8  | C9  | 23.9 (3)   | C10 | N1  | C7  | C8  | -17.2 (4)  |
| N1  | C7  | C8  | C11 | 150.5 (3)  | C11 | S1  | C12 | C13 | -54.8 (3)  |
| C1  | C2  | C3  | C11 | -177.7 (3) | C11 | S1  | C12 | C19 | 127.3 (3)  |
| C1  | C2  | C3  | C4  | 1.2 (6)    | C11 | C8  | C9  | F1  | -26.5 (4)  |
| F2  | C9  | C10 | O1  | -43.6 (6)  | C11 | C8  | C9  | F2  | 93.8 (4)   |
| F2  | C9  | C10 | N1  | 138.0 (3)  | C11 | C8  | C9  | C10 | -144.7 (3) |
| O2  | S1  | C11 | C8  | 67.5 (3)   | C12 | S1  | C11 | C8  | -177.7 (2) |
| O2  | S1  | C12 | C13 | 60.5 (3)   | C12 | C13 | C14 | C15 | -179.2 (3) |
| O2  | S1  | C12 | C19 | -117.3 (3) | C12 | C13 | C18 | C17 | 179.3 (3)  |
| C2  | C1  | C6  | N1  | 177.2 (3)  | C12 | C19 | C20 | O4  | 12.3 (6)   |
| C2  | C1  | C6  | C5  | 0.4 (5)    | C12 | C19 | C20 | O5  | -166.3 (3) |
| C2  | C3  | C4  | C5  | 0.0 (6)    | C13 | C12 | C19 | C20 | -7.8 (6)   |
| O3  | S1  | C11 | C8  | -61.9 (3)  | C13 | C14 | C15 | C16 | -0.2 (6)   |
| O3  | S1  | C12 | C13 | -169.9 (2) | C14 | C13 | C18 | C17 | 0.3 (5)    |
| O3  | S1  | C12 | C19 | 12.2 (3)   | C14 | C15 | C16 | C17 | 0.6 (6)    |
| C3  | C4  | C5  | C6  | -1.0 (5)   | C15 | C16 | C17 | C18 | -0.4 (6)   |
| C4  | C5  | C6  | N1  | -176.1 (3) | C16 | C17 | C18 | C13 | 0.0 (5)    |
| C4  | C5  | C6  | C1  | 0.8 (5)    | C18 | C13 | C14 | C15 | -0.2 (5)   |
| O5  | C21 | C22 | C23 | 176.5 (3)  | C19 | C12 | C13 | C14 | -60.9 (5)  |



**Table 6 Torsion Angles for 3ac.**

| A  | B   | C   | D   | Angle/°    | A   | B   | C   | D   | Angle/°    |
|----|-----|-----|-----|------------|-----|-----|-----|-----|------------|
| O5 | C21 | C26 | C25 | -176.5 (3) | C19 | C12 | C13 | C18 | 120.2 (4)  |
| C6 | N1  | C7  | C8  | 165.1 (3)  | C20 | O5  | C21 | C22 | 114.5 (3)  |
| C6 | N1  | C10 | O1  | 2.0 (8)    | C20 | O5  | C21 | C26 | -69.4 (4)  |
| C6 | N1  | C10 | C9  | -179.7 (3) | C21 | O5  | C20 | O4  | 3.8 (5)    |
| C6 | C1  | C2  | C3  | -1.3 (6)   | C21 | O5  | C20 | C19 | -177.6 (3) |
| C7 | N1  | C6  | C1  | -165.2 (3) | C21 | C22 | C23 | C24 | -0.2 (5)   |
| C7 | N1  | C6  | C5  | 11.7 (5)   | C22 | C21 | C26 | C25 | -0.6 (5)   |
| C7 | N1  | C10 | O1  | -175.6 (5) | C22 | C23 | C24 | C25 | 0.2 (5)    |
| C7 | N1  | C10 | C9  | 2.7 (5)    | C23 | C24 | C25 | C26 | -0.3 (6)   |
| C7 | C8  | C9  | F1  | 95.5 (3)   | C24 | C25 | C26 | C21 | 0.5 (5)    |
| C7 | C8  | C9  | F2  | -144.2 (3) | C26 | C21 | C22 | C23 | 0.4 (5)    |
| C7 | C8  | C9  | C10 | -22.7 (4)  |     |     |     |     |            |

**Table 7 Hydrogen Atom Coordinates ( $\text{\AA} \times 10^4$ ) and Isotropic Displacement Parameters ( $\text{\AA}^2 \times 10^3$ ) for 3ac.**

| Atom | x        | y        | z       | U(eq) |
|------|----------|----------|---------|-------|
| H1   | -2843.49 | 7610.57  | 5922.46 | 42    |
| H2   | -3430.26 | 8515.76  | 6937.49 | 47    |
| H4   | 2098.41  | 9727.83  | 6541.24 | 42    |
| H5   | 2648.78  | 8892.56  | 5499.33 | 38    |
| H7A  | 3729.4   | 7041.39  | 5057.29 | 31    |
| H7B  | 2735.01  | 8300.31  | 4352.06 | 31    |
| H8   | 3189.91  | 5498.15  | 4521.05 | 33    |
| H11A | 5417.04  | 6795.64  | 3693.93 | 30    |
| H11B | 3306.68  | 7566     | 3166.16 | 30    |
| H14  | 8074.32  | 7926.48  | 2018.64 | 47    |
| H15  | 6820.68  | 10087.25 | 1215.63 | 61    |
| H16  | 3579.72  | 10674.06 | 555.52  | 65    |
| H17  | 1495.08  | 9138.17  | 695.74  | 56    |
| H18  | 2700.93  | 6955.42  | 1502.28 | 41    |
| H19  | 8487.3   | 4139.82  | 2769.27 | 31    |
| H22  | 15109.78 | 3214.2   | 2108.7  | 38    |
| H23  | 18008.3  | 2802.91  | 1318.5  | 41    |
| H24  | 17319.85 | 2922.55  | 86.41   | 43    |
| H25  | 13764.12 | 3464.2   | -362.72 | 42    |
| H26  | 10860.55 | 3867.93  | 425.83  | 37    |

## 9.2 X-ray crystallography data of 4fa.

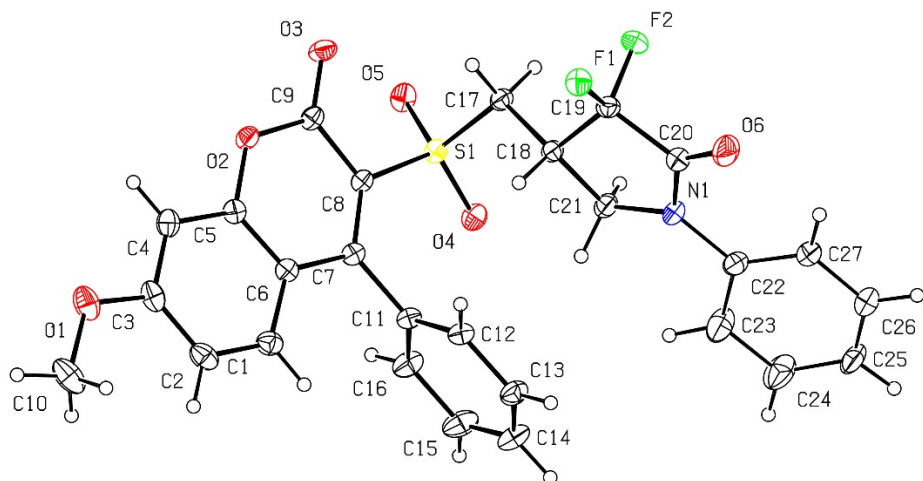

#### Crystal structure determination of 4fa.

Crystal Data for  $C_{27}H_{21}F_2NO_6S$  ( $M = 525.51$  g/mol): monoclinic, space group  $P2_1/c$  (no. 14),  $a = 10.2939(4)$  Å,  $b = 9.7381(4)$  Å,  $c = 25.5602(11)$  Å,  $\beta = 91.730(2)^\circ$ ,  $V = 2561.06(18)$  Å<sup>3</sup>,  $Z = 4$ ,  $T = 170.00$  K,  $\mu(\text{MoK}\alpha) = 0.183$  mm<sup>-1</sup>,  $D_{\text{calc}} = 1.363$  g/cm<sup>3</sup>, 61885 reflections measured ( $5.008^\circ \leq 2\theta \leq 55.026^\circ$ ), 5903 unique ( $R_{\text{int}} = 0.0797$ ,  $R_{\text{sigma}} = 0.0343$ ) which were used in all calculations. The final  $R_1$  was 0.0441 ( $I > 2\sigma(I)$ ) and  $wR_2$  was 0.1095 (all data).

**Table 1 Crystal data and structure refinement for 4fa.**

|                     |                        |
|---------------------|------------------------|
| Identification code | 4af                    |
| Empirical formula   | $C_{27}H_{21}F_2NO_6S$ |
| Formula weight      | 525.51                 |
| Temperature/K       | 170.00                 |
| Crystal system      | monoclinic             |
| Space group         | $P2_1/c$               |
| $a/\text{Å}$        | 10.2939(4)             |
| $b/\text{Å}$        | 9.7381(4)              |
| $c/\text{Å}$        | 25.5602(11)            |
| $\alpha/^\circ$     | 90                     |
| $\beta/^\circ$      | 91.730(2)              |

|                                                |                                                               |
|------------------------------------------------|---------------------------------------------------------------|
| $\gamma/^\circ$                                | 90                                                            |
| Volume/ $\text{\AA}^3$                         | 2561.06(18)                                                   |
| Z                                              | 4                                                             |
| $\rho_{\text{calc}}/\text{cm}^3$               | 1.363                                                         |
| $\mu/\text{mm}^{-1}$                           | 0.183                                                         |
| F(000)                                         | 1088.0                                                        |
| Crystal size/ $\text{mm}^3$                    | $0.4 \times 0.23 \times 0.16$                                 |
| Radiation                                      | MoK $\alpha$ ( $\lambda = 0.71073$ )                          |
| 2 $\Theta$ range for data collection/ $^\circ$ | 5.008 to 55.026                                               |
| Index ranges                                   | $-13 \leq h \leq 12, -12 \leq k \leq 12, -33 \leq l \leq 33$  |
| Reflections collected                          | 61885                                                         |
| Independent reflections                        | 5903 [ $R_{\text{int}} = 0.0797, R_{\text{sigma}} = 0.0343$ ] |
| Data/restraints/parameters                     | 5903/207/390                                                  |
| Goodness-of-fit on $F^2$                       | 1.021                                                         |
| Final R indexes [ $I \geq 2\sigma(I)$ ]        | $R_1 = 0.0441, wR_2 = 0.0998$                                 |
| Final R indexes [all data]                     | $R_1 = 0.0658, wR_2 = 0.1095$                                 |
| Largest diff. peak/hole / $e \text{\AA}^{-3}$  | 0.26/-0.31                                                    |

**Table 2 Fractional Atomic Coordinates ( $\times 10^4$ ) and Equivalent Isotropic Displacement Parameters ( $\text{\AA}^2 \times 10^3$ ) for 3fa.  $U_{\text{eq}}$  is defined as 1/3 of the trace of the orthogonalised  $U_{ij}$  tensor.**

| Atom | x           | y          | z          | $U(\text{eq})$ |
|------|-------------|------------|------------|----------------|
| S1   | 8832.0(4)   | 2251.7(5)  | 7517.4(2)  | 26.53(12)      |
| F1   | 9550.2(10)  | 6029.7(11) | 8688.7(4)  | 35.4(3)        |
| F2   | 9107.7(11)  | 4164.0(12) | 9110.2(4)  | 36.4(3)        |
| O1   | 11106.9(16) | 6836.3(16) | 5087.3(6)  | 46.6(4)        |
| O2   | 11295.3(11) | 4051.7(13) | 6561.6(5)  | 28.7(3)        |
| O3   | 11572.7(12) | 2909.8(14) | 7294.9(5)  | 34.7(3)        |
| O4   | 7448.7(12)  | 2113.4(14) | 7471.2(5)  | 32.9(3)        |
| O5   | 9601.3(13)  | 1021.0(13) | 7512.3(5)  | 34.2(3)        |
| O6   | 7280.0(15)  | 6520.0(18) | 9258.7(6)  | 52.7(4)        |
| N1   | 6400.1(15)  | 4910.8(18) | 8679.8(6)  | 33.4(4)        |
| C1   | 8484.0(19)  | 5726(2)    | 5925.8(7)  | 33.6(4)        |
| C2   | 9085(2)     | 6387(2)    | 5524.2(8)  | 38.1(5)        |
| C3   | 10423(2)    | 6241(2)    | 5470.9(7)  | 35.2(4)        |
| C4   | 11149.9(19) | 5441(2)    | 5820.2(7)  | 32.7(4)        |
| C5   | 10523.7(17) | 4796.5(18) | 6221.0(7)  | 26.4(4)        |
| C6   | 9183.9(17)  | 4902.5(18) | 6287.3(7)  | 26.2(4)        |
| C7   | 8592.7(16)  | 4142.8(17) | 6701.9(7)  | 24.8(4)        |
| C8   | 9380.5(16)  | 3348.8(17) | 7017.2(7)  | 23.4(3)        |
| C9   | 10799.3(17) | 3393.2(18) | 6984.7(7)  | 26.5(4)        |
| C10  | 10426(3)    | 7708(2)    | 4725.3(9)  | 53.8(6)        |
| C11  | 7163.9(16)  | 4347.5(18) | 6768.4(7)  | 26.2(4)        |
| C12  | 6765.2(17)  | 5514.4(19) | 7029.6(7)  | 29.2(4)        |
| C13  | 5446.2(19)  | 5743(2)    | 7101.1(8)  | 37.1(5)        |
| C14  | 4539(2)     | 4830(2)    | 6900.2(9)  | 45.0(5)        |
| C15  | 4934(2)     | 3699(2)    | 6624.4(10) | 48.2(6)        |
| C16  | 6244.9(19)  | 3443(2)    | 6557.6(9)  | 38.3(5)        |
| C17  | 9225.0(17)  | 3138.1(19) | 8111.6(7)  | 28.0(4)        |
| C18  | 8299.6(16)  | 4314.9(18) | 8225.6(7)  | 25.8(4)        |
| C19  | 8633.0(17)  | 5046.9(19) | 8730.4(7)  | 28.6(4)        |
| C20  | 7353.9(19)  | 5628(2)    | 8931.0(7)  | 34.9(4)        |

|      |            |          |            |          |
|------|------------|----------|------------|----------|
| C21  | 6874.1(17) | 3904(2)  | 8300.5(7)  | 32.2(4)  |
| C22  | 5070(6)    | 4932(17) | 8828(3)    | 36.5(13) |
| C23  | 4152(6)    | 4400(7)  | 8488(3)    | 52.9(15) |
| C24  | 2870(6)    | 4315(7)  | 8632(3)    | 60.1(15) |
| C25  | 2495(7)    | 4756(10) | 9108(3)    | 50.7(15) |
| C26  | 3398(4)    | 5414(6)  | 9425.6(15) | 56.0(11) |
| C27  | 4686(3)    | 5514(6)  | 9293.1(14) | 48.8(10) |
| C22A | 5023(11)   | 4820(40) | 8780(5)    | 39(2)    |
| C23A | 4101(11)   | 4765(12) | 8387(4)    | 33.7(18) |
| C24A | 2802(11)   | 4623(12) | 8492(4)    | 37.6(17) |
| C25A | 2441(14)   | 4550(20) | 8994(5)    | 49(2)    |
| C26A | 3360(7)    | 4456(12) | 9411(3)    | 57.6(18) |
| C27A | 4669(7)    | 4577(12) | 9292(3)    | 54.4(17) |

**Table 3 Anisotropic Displacement Parameters ( $\text{\AA}^2 \times 10^3$ ) for 3fa. The Anisotropic displacement factor exponent takes the form:  $-2\pi^2[h^2a^*2U_{11}+2hka^*b^*U_{12}+\dots]$ .**

| Atom | $U_{11}$ | $U_{22}$ | $U_{33}$ | $U_{23}$ | $U_{13}$ | $U_{12}$  |
|------|----------|----------|----------|----------|----------|-----------|
| S1   | 26.4(2)  | 20.9(2)  | 32.4(2)  | 2.25(18) | 4.15(17) | -0.52(17) |
| F1   | 34.9(6)  | 33.6(6)  | 37.7(6)  | -1.7(5)  | 2.3(5)   | -5.5(5)   |
| F2   | 38.5(6)  | 40.2(7)  | 30.3(6)  | 9.0(5)   | -3.6(5)  | 5.8(5)    |
| O1   | 65.9(10) | 40.2(9)  | 34.2(8)  | 8.4(7)   | 9.7(7)   | -4.7(7)   |
| O2   | 23.3(6)  | 29.0(7)  | 34.0(7)  | 4.5(5)   | 4.3(5)   | 1.5(5)    |
| O3   | 25.4(7)  | 34.5(8)  | 44.1(8)  | 10.4(6)  | -1.5(6)  | 5.1(6)    |
| O4   | 27.5(7)  | 31.1(7)  | 40.3(7)  | 0.1(6)   | 4.9(5)   | -6.9(5)   |
| O5   | 41.9(8)  | 19.9(7)  | 41.2(8)  | 3.9(6)   | 9.1(6)   | 5.0(6)    |
| O6   | 45.7(9)  | 66.5(11) | 45.9(9)  | -22.1(8) | 4.4(7)   | 11.5(8)   |
| N1   | 23.8(8)  | 43.0(10) | 33.7(8)  | 0.1(7)   | 5.6(6)   | 5.6(7)    |
| C1   | 35.5(10) | 30.5(10) | 34.5(10) | 0.5(8)   | -2.9(8)  | 3.1(8)    |
| C2   | 52.3(13) | 30.5(11) | 31.2(10) | 3.0(8)   | -5.0(9)  | 1.2(9)    |
| C3   | 52.4(12) | 25.9(10) | 27.5(9)  | -0.6(8)  | 6.4(9)   | -6.1(9)   |
| C4   | 37.1(10) | 28.6(10) | 32.6(10) | -3.9(8)  | 6.5(8)   | -2.7(8)   |
| C5   | 31.1(9)  | 19.4(9)  | 28.8(9)  | -1.5(7)  | 2.0(7)   | -0.2(7)   |
| C6   | 29.2(9)  | 21.0(9)  | 28.3(9)  | -1.4(7)  | 0.7(7)   | 0.1(7)    |
| C7   | 24.3(9)  | 19.6(9)  | 30.3(9)  | -5.7(7)  | -1.1(7)  | -1.2(7)   |
| C8   | 23.8(8)  | 17.9(8)  | 28.7(9)  | -1.2(7)  | 2.3(7)   | 0.2(7)    |
| C9   | 26.0(9)  | 19.7(9)  | 34.0(9)  | 0.4(7)   | 4.2(7)   | 1.8(7)    |
| C10  | 85.0(18) | 42.2(13) | 33.9(11) | 8.6(10)  | -3.1(11) | -10.6(13) |
| C11  | 22.9(9)  | 23.0(9)  | 32.6(9)  | 0.7(7)   | -1.8(7)  | 0.6(7)    |
| C12  | 25.9(9)  | 26.1(9)  | 35.4(10) | 0.3(8)   | -3.4(7)  | 1.2(7)    |
| C13  | 31.6(10) | 35.1(11) | 44.8(11) | -2.5(9)  | 0.4(8)   | 9.5(9)    |
| C14  | 23.1(10) | 46.5(13) | 65.2(14) | 0.2(11)  | 0.1(9)   | 4.9(9)    |
| C15  | 26.5(10) | 43.9(13) | 73.5(16) | -6.8(12) | -8.3(10) | -6.9(9)   |
| C16  | 29.1(10) | 30.3(11) | 55.2(13) | -9.4(9)  | -2.8(9)  | -0.4(8)   |
| C17  | 24.4(9)  | 29.2(10) | 30.4(9)  | 1.2(7)   | 1.5(7)   | 3.4(7)    |
| C18  | 23.2(9)  | 26.9(9)  | 27.5(9)  | 3.4(7)   | 2.2(7)   | 1.8(7)    |
| C19  | 26.1(9)  | 30.1(10) | 29.6(9)  | 4.8(7)   | -0.9(7)  | 1.5(7)    |
| C20  | 31.1(10) | 43.8(12) | 30.0(10) | 1.1(9)   | 2.3(8)   | 6.9(9)    |
| C21  | 24.8(9)  | 37.2(11) | 34.8(10) | -2.1(8)  | 3.9(8)   | 1.2(8)    |
| C22  | 27(2)    | 44(3)    | 38(2)    | 6(2)     | 2.6(18)  | 5.4(18)   |
| C23  | 37(2)    | 61(4)    | 61(3)    | -22(2)   | 12(2)    | -5(2)     |
| C24  | 33(2)    | 72(4)    | 76(4)    | -18(3)   | 9(3)     | -11(2)    |

|      |          |       |          |          |         |          |
|------|----------|-------|----------|----------|---------|----------|
| C25  | 27(2)    | 68(3) | 58(3)    | 7(3)     | 17(2)   | 10(2)    |
| C26  | 35.3(18) | 90(3) | 43.5(18) | -1(2)    | 9.6(14) | 15(2)    |
| C27  | 29.7(16) | 81(3) | 35.4(16) | -5.8(19) | 0.3(13) | 10.8(19) |
| C22A | 27(3)    | 56(4) | 33(3)    | 0(3)     | 8(3)    | 12(3)    |
| C23A | 25(3)    | 44(4) | 31(3)    | 13(3)    | -1(2)   | -6(3)    |
| C24A | 29(3)    | 47(4) | 37(3)    | 21(3)    | -3(3)   | -3(3)    |
| C25A | 29(3)    | 75(5) | 45(4)    | -4(4)    | 1(3)    | 0(3)     |
| C26A | 39(3)    | 97(4) | 38(3)    | -7(3)    | 13(3)   | -7(4)    |
| C27A | 33(3)    | 93(4) | 37(3)    | -3(3)    | 1(2)    | 0(3)     |

**Table 4 Bond Lengths for 4fa.**

| Atom | Atom | Length/Å   | Atom | Atom | Length/Å  |
|------|------|------------|------|------|-----------|
| S1   | O4   | 1.4317(13) | C7   | C11  | 1.499(2)  |
| S1   | O5   | 1.4367(13) | C8   | C9   | 1.466(2)  |
| S1   | C8   | 1.7716(18) | C11  | C12  | 1.386(3)  |
| S1   | C17  | 1.7828(18) | C11  | C16  | 1.389(3)  |
| F1   | C19  | 1.351(2)   | C12  | C13  | 1.393(3)  |
| F2   | C19  | 1.375(2)   | C13  | C14  | 1.378(3)  |
| O1   | C3   | 1.354(2)   | C14  | C15  | 1.376(3)  |
| O1   | C10  | 1.425(3)   | C15  | C16  | 1.388(3)  |
| O2   | C5   | 1.369(2)   | C17  | C18  | 1.524(2)  |
| O2   | C9   | 1.369(2)   | C18  | C19  | 1.505(3)  |
| O3   | C9   | 1.203(2)   | C18  | C21  | 1.538(2)  |
| O6   | C20  | 1.211(2)   | C19  | C20  | 1.535(3)  |
| N1   | C20  | 1.351(3)   | C22  | C23  | 1.366(8)  |
| N1   | C21  | 1.472(2)   | C22  | C27  | 1.385(9)  |
| N1   | C22  | 1.431(6)   | C23  | C24  | 1.383(6)  |
| N1   | C22A | 1.451(11)  | C24  | C25  | 1.357(7)  |
| C1   | C2   | 1.374(3)   | C25  | C26  | 1.375(7)  |
| C1   | C6   | 1.405(3)   | C26  | C27  | 1.382(5)  |
| C2   | C3   | 1.396(3)   | C22A | C23A | 1.362(12) |
| C3   | C4   | 1.387(3)   | C22A | C27A | 1.388(14) |
| C4   | C5   | 1.378(3)   | C23A | C24A | 1.379(11) |
| C5   | C6   | 1.399(2)   | C24A | C25A | 1.347(12) |
| C6   | C7   | 1.442(2)   | C25A | C26A | 1.407(13) |
| C7   | C8   | 1.366(2)   | C26A | C27A | 1.395(9)  |

**Table 5 Bond Angles for 4fa.**

| Atom | Atom | Atom | Angle/°    | Atom | Atom | Atom | Angle/°    |
|------|------|------|------------|------|------|------|------------|
| O4   | S1   | O5   | 117.90(8)  | C16  | C11  | C7   | 122.06(16) |
| O4   | S1   | C8   | 109.57(8)  | C11  | C12  | C13  | 119.86(17) |
| O4   | S1   | C17  | 108.38(8)  | C14  | C13  | C12  | 120.02(19) |
| O5   | S1   | C8   | 107.98(8)  | C15  | C14  | C13  | 120.02(19) |
| O5   | S1   | C17  | 107.50(8)  | C14  | C15  | C16  | 120.7(2)   |
| C8   | S1   | C17  | 104.70(9)  | C15  | C16  | C11  | 119.47(19) |
| C3   | O1   | C10  | 117.95(19) | C18  | C17  | S1   | 113.58(12) |
| C5   | O2   | C9   | 121.84(14) | C17  | C18  | C21  | 115.62(15) |
| C20  | N1   | C21  | 113.97(15) | C19  | C18  | C17  | 113.11(14) |
| C20  | N1   | C22  | 123.6(4)   | C19  | C18  | C21  | 102.13(14) |
| C20  | N1   | C22A | 130.4(9)   | F1   | C19  | F2   | 105.33(14) |
| C22  | N1   | C21  | 121.5(5)   | F1   | C19  | C18  | 114.20(15) |

|      |     |     |            |      |      |      |            |
|------|-----|-----|------------|------|------|------|------------|
| C22A | N1  | C21 | 114.8(11)  | F1   | C19  | C20  | 111.95(16) |
| C2   | C1  | C6  | 121.66(19) | F2   | C19  | C18  | 112.09(15) |
| C1   | C2  | C3  | 119.55(19) | F2   | C19  | C20  | 106.54(14) |
| O1   | C3  | C2  | 124.30(19) | C18  | C19  | C20  | 106.57(15) |
| O1   | C3  | C4  | 115.10(19) | O6   | C20  | N1   | 129.76(18) |
| C4   | C3  | C2  | 120.60(18) | O6   | C20  | C19  | 124.60(18) |
| C5   | C4  | C3  | 118.62(18) | N1   | C20  | C19  | 105.62(16) |
| O2   | C5  | C4  | 116.02(16) | N1   | C21  | C18  | 104.20(15) |
| O2   | C5  | C6  | 121.16(15) | C23  | C22  | N1   | 118.4(6)   |
| C4   | C5  | C6  | 122.81(17) | C23  | C22  | C27  | 119.4(5)   |
| C1   | C6  | C7  | 123.81(17) | C27  | C22  | N1   | 122.2(5)   |
| C5   | C6  | C1  | 116.76(16) | C22  | C23  | C24  | 120.1(6)   |
| C5   | C6  | C7  | 119.40(16) | C25  | C24  | C23  | 121.3(6)   |
| C6   | C7  | C11 | 116.90(15) | C24  | C25  | C26  | 118.1(6)   |
| C8   | C7  | C6  | 117.89(16) | C25  | C26  | C27  | 121.7(4)   |
| C8   | C7  | C11 | 125.13(16) | C26  | C27  | C22  | 118.8(4)   |
| C7   | C8  | S1  | 124.81(13) | C23A | C22A | N1   | 122.3(10)  |
| C7   | C8  | C9  | 121.64(16) | C23A | C22A | C27A | 119.5(10)  |
| C9   | C8  | S1  | 113.48(12) | C27A | C22A | N1   | 117.6(11)  |
| O2   | C9  | C8  | 117.03(15) | C22A | C23A | C24A | 121.2(9)   |
| O3   | C9  | O2  | 116.68(16) | C25A | C24A | C23A | 119.1(10)  |
| O3   | C9  | C8  | 126.29(17) | C24A | C25A | C26A | 121.8(11)  |
| C12  | C11 | C7  | 117.99(15) | C27A | C26A | C25A | 117.4(9)   |
| C12  | C11 | C16 | 119.89(17) | C22A | C27A | C26A | 120.1(8)   |

**Table 6 Torsion Angles for 4fa.**

| A  | B    | C    | D    | Angle/°     | A   | B   | C    | D    | Angle/°     |
|----|------|------|------|-------------|-----|-----|------|------|-------------|
| S1 | C8   | C9   | O2   | 170.56(12)  | C10 | O1  | C3   | C4   | -178.01(18) |
| S1 | C8   | C9   | O3   | -9.7(2)     | C11 | C7  | C8   | S1   | 7.8(3)      |
| S1 | C17  | C18  | C19  | 179.46(12)  | C11 | C7  | C8   | C9   | -168.90(16) |
| S1 | C17  | C18  | C21  | 62.19(18)   | C11 | C12 | C13  | C14  | -1.7(3)     |
| F1 | C19  | C20  | O6   | -37.3(3)    | C12 | C11 | C16  | C15  | -1.9(3)     |
| F1 | C19  | C20  | N1   | 144.53(16)  | C12 | C13 | C14  | C15  | -0.7(3)     |
| F2 | C19  | C20  | O6   | 77.3(2)     | C13 | C14 | C15  | C16  | 1.8(4)      |
| F2 | C19  | C20  | N1   | -100.82(17) | C14 | C15 | C16  | C11  | -0.5(4)     |
| O1 | C3   | C4   | C5   | -179.80(17) | C16 | C11 | C12  | C13  | 3.0(3)      |
| O2 | C5   | C6   | C1   | 178.09(16)  | C17 | S1  | C8   | C7   | -104.52(16) |
| O2 | C5   | C6   | C7   | -4.0(3)     | C17 | S1  | C8   | C9   | 72.43(14)   |
| O4 | S1   | C8   | C7   | 11.54(18)   | C17 | C18 | C19  | F1   | 84.14(19)   |
| O4 | S1   | C8   | C9   | -171.51(12) | C17 | C18 | C19  | F2   | -35.5(2)    |
| O4 | S1   | C17  | C18  | -40.07(15)  | C17 | C18 | C19  | C20  | -151.72(15) |
| O5 | S1   | C8   | C7   | 141.15(15)  | C17 | C18 | C21  | N1   | 148.10(15)  |
| O5 | S1   | C8   | C9   | -41.91(15)  | C18 | C19 | C20  | O6   | -162.8(2)   |
| O5 | S1   | C17  | C18  | -168.52(12) | C18 | C19 | C20  | N1   | 19.0(2)     |
| N1 | C22  | C23  | C24  | 175.6(8)    | C19 | C18 | C21  | N1   | 24.84(18)   |
| N1 | C22  | C27  | C26  | -175.8(9)   | C20 | N1  | C21  | C18  | -14.6(2)    |
| N1 | C22A | C23A | C24A | 177.4(18)   | C20 | N1  | C22  | C23  | 167.0(8)    |
| N1 | C22A | C27A | C26A | -179.0(16)  | C20 | N1  | C22  | C27  | -10.7(16)   |
| C1 | C2   | C3   | O1   | 179.37(18)  | C20 | N1  | C22A | C23A | 141.5(19)   |
| C1 | C2   | C3   | C4   | -0.2(3)     | C20 | N1  | C22A | C27A | -48(3)      |
| C1 | C6   | C7   | C8   | 178.09(17)  | C21 | N1  | C20  | O6   | 179.6(2)    |

|     |     |     |     |             |      |      |      |      |             |
|-----|-----|-----|-----|-------------|------|------|------|------|-------------|
| C1  | C6  | C7  | C11 | -4.9(3)     | C21  | N1   | C20  | C19  | -2.3(2)     |
| C2  | C1  | C6  | C5  | 0.5(3)      | C21  | N1   | C22  | C23  | -24.6(15)   |
| C2  | C1  | C6  | C7  | -177.32(18) | C21  | N1   | C22  | C27  | 157.8(9)    |
| C2  | C3  | C4  | C5  | -0.2(3)     | C21  | N1   | C22A | C23A | -50(3)      |
| C3  | C4  | C5  | O2  | -178.27(16) | C21  | N1   | C22A | C27A | 121(2)      |
| C3  | C4  | C5  | C6  | 0.7(3)      | C21  | C18  | C19  | F1   | -150.92(15) |
| C4  | C5  | C6  | C1  | -0.9(3)     | C21  | C18  | C19  | F2   | 89.40(17)   |
| C4  | C5  | C6  | C7  | 177.01(17)  | C21  | C18  | C19  | C20  | -26.78(18)  |
| C5  | O2  | C9  | O3  | -171.13(16) | C22  | N1   | C20  | O6   | -11.1(8)    |
| C5  | O2  | C9  | C8  | 8.7(2)      | C22  | N1   | C20  | C19  | 166.9(7)    |
| C5  | C6  | C7  | C8  | 0.4(2)      | C22  | N1   | C21  | C18  | 175.8(6)    |
| C5  | C6  | C7  | C11 | 177.33(16)  | C22  | C23  | C24  | C25  | 0.2(12)     |
| C6  | C1  | C2  | C3  | 0.1(3)      | C23  | C22  | C27  | C26  | 6.6(16)     |
| C6  | C7  | C8  | S1  | -175.48(13) | C23  | C24  | C25  | C26  | 6.3(12)     |
| C6  | C7  | C8  | C9  | 7.8(2)      | C24  | C25  | C26  | C27  | -6.3(12)    |
| C6  | C7  | C11 | C12 | -79.7(2)    | C25  | C26  | C27  | C22  | -0.1(11)    |
| C6  | C7  | C11 | C16 | 97.4(2)     | C27  | C22  | C23  | C24  | -6.7(17)    |
| C7  | C8  | C9  | O2  | -12.4(2)    | C22A | N1   | C20  | O6   | -11.3(17)   |
| C7  | C8  | C9  | O3  | 167.39(18)  | C22A | N1   | C20  | C19  | 166.7(16)   |
| C7  | C11 | C12 | C13 | -179.85(17) | C22A | N1   | C21  | C18  | 174.5(12)   |
| C7  | C11 | C16 | C15 | -178.90(19) | C22A | C23A | C24A | C25A | 1(3)        |
| C8  | S1  | C17 | C18 | 76.81(14)   | C23A | C22A | C27A | C26A | -8(4)       |
| C8  | C7  | C11 | C12 | 97.1(2)     | C23A | C24A | C25A | C26A | -8(3)       |
| C8  | C7  | C11 | C16 | -85.8(2)    | C24A | C25A | C26A | C27A | 6(3)        |
| C9  | O2  | C5  | C4  | 178.19(16)  | C25A | C26A | C27A | C22A | 2(2)        |
| C9  | O2  | C5  | C6  | -0.8(2)     | C27A | C22A | C23A | C24A | 7(4)        |
| C10 | O1  | C3  | C2  | 2.4(3)      |      |      |      |      |             |
